# Supplementary material for: Rpv29, Rpv30 and Rpv31: Three Novel Genomic Loci Associated With Resistance to Plasmopara viticola in Vitis vinifera
Source: Front Plant Sci. 2020 Oct 8;11:562432. doi: 10.3389/fpls.2020.562432 (PMC7583455; doi:10.3389/fpls.2020.562432)
Supplement: Supplementary Table S2 — SNP profiles of 132 grapevine accessions, belonging to a Mgaloblishvili self-pollinated population (84) and Georgian germplasm population (48), genotyped at 18 k loci. Row data were filtered based on SNP call quality (p50GC) < 0.54, GenTrain score > 0.6, marker missing rate > 20% and minor allele frequency (MAF) > 5%, resulting in 12,825 SNP loci used for GWAS. “AA”: homozygous for dominant allele; “AB”: heterozygous for dominant allele; “BB”: homozygous for recessive allele; “NC”: missing data. [file Table_2.xlsx]

## Sheet: Sheet1
Supplementary Table 2. SNP profiles of 132 grapevine accessions, belonging to a Mgaloblishvili self-pollinated (84) and Georgian germplasm population (48), genotyped at 18k loci. Row data were filtered based on SNP call quality (p50GC) < 0.54, GenTrain score > 0.6, marker missing rate < 20% and minor allele frequency (MAF) > 5%, resulting in 12,825 SNP loci used for GWAS. “AA”: homozygous for dom…
SNP ID	Chromosome	Position	Strand	SNP	Mgaloblishvili self-population
					ID 40	ID 181	ID LIB 66	ID 99	ID 65	ID 157 M	ID 124	ID 95	ID LIB 70	ID 42	ID 182	ID 121	ID L22A	ID LIB 16	ID 176	ID 43	ID 97	ID LIB 13	ID 69	ID 122	ID 21	ID 153	ID LIB 56	ID 94	ID 61	ID 207	ID 116	ID 87	ID LIB 60	ID 155	ID 114	ID 153 M	ID 210	ID 89	ID LIB 63	ID 199	ID 67	ID 115	ID 155 M	ID 14	ID 138	ID LIB 48	ID 55	ID 196	ID LIB 145
chr1_10027559_G_T	1	10027559	TOP	[A/C]	AB	AB	AA	AA	AB	AB	BB	AA	BB	AB	BB	AB	AB	BB	AB	AA	BB	AB	BB	AB	AB	AB	AB	AB	AA	AB	AB	AA	AA	BB	AB	NC	AB	AB	BB	AB	BB	AB	AB	AA	AB	AB	BB	AB	BB
cn_C_T_chr1_10028280	1	10028280	BOT	[T/C]	BB	BB	BB	BB	BB	BB	BB	BB	BB	BB	BB	BB	BB	BB	BB	BB	BB	BB	BB	BB	BB	BB	BB	BB	BB	BB	BB	BB	BB	BB	BB	BB	BB	BB	BB	BB	BB	BB	BB	BB	BB	BB	BB	BB	BB
chr1_10048792_C_T	1	10048792	BOT	[T/C]	AA	AA	NC	NC	AA	AA	AA	NC	AA	AA	AA	AA	AA	AA	AA	NC	AA	AA	AA	AA	AA	AA	AA	AA	NC	AA	AA	NC	NC	AA	AA	AA	AA	AA	AA	AA	AA	AA	AA	NC	AA	AA	AA	AA	AA
chr1_10064124_A_G	1	10064124	BOT	[T/C]	AA	AA	AA	AA	AA	AA	AA	AA	AA	AA	AA	AA	AA	AA	AA	AA	AA	AA	AA	AA	AA	AA	AA	AA	AA	AA	AA	AA	AA	AA	AA	AA	AA	AA	AA	AA	AA	AA	AA	AA	AA	AA	AA	AA	AA
SNP851_110	1	10068071	TOP	[A/G]	BB	BB	BB	BB	BB	BB	BB	BB	BB	BB	BB	BB	BB	BB	BB	BB	BB	BB	BB	BB	BB	BB	BB	BB	BB	BB	BB	BB	BB	BB	BB	NC	BB	BB	BB	BB	BB	BB	BB	BB	BB	BB	BB	BB	BB
chr1_10103455_C_T	1	10103455	TOP	[A/G]	BB	BB	BB	BB	BB	BB	BB	BB	BB	BB	BB	BB	BB	BB	BB	BB	BB	BB	BB	BB	BB	BB	BB	BB	BB	BB	BB	BB	BB	BB	BB	BB	BB	BB	BB	BB	BB	BB	BB	BB	BB	BB	BB	BB	BB
mu_s_T_C_chr1_10130173	1	10130173	BOT	[T/C]	AA	AA	AA	AA	AA	AA	AA	AA	AA	AA	AA	AA	AA	AA	AA	AA	AA	AA	AA	AA	AA	AA	AA	AA	AA	AA	AA	AA	AA	AA	AA	AA	AA	AA	AA	AA	AA	AA	AA	AA	AA	AA	AA	AA	AA
chr1_10136235_A_G	1	10136235	TOP	[A/G]	AA	AA	AA	AA	AA	AA	AA	AA	AA	AA	AA	AA	AA	AA	AA	AA	AA	AA	AA	AA	AA	AA	AA	AA	AA	AA	AA	AA	AA	AA	AA	AA	AA	AA	AA	AA	AA	AA	AA	AA	AA	AA	AA	AA	AA
chr1_10198406_G_T	1	10198406	TOP	[A/C]	AB	AB	BB	BB	AB	AB	AA	BB	AA	AB	AA	AB	AB	AA	AB	BB	AA	AB	AA	AB	AB	AB	AB	AB	BB	AB	AB	BB	BB	AA	AB	NC	AB	AA	AA	AB	AA	AB	AB	BB	AB	AB	AA	AB	AA
chr1_10215474_A_G	1	10215474	TOP	[A/G]	BB	BB	BB	BB	BB	BB	BB	BB	BB	BB	BB	BB	BB	BB	BB	BB	BB	BB	BB	BB	BB	BB	BB	BB	BB	BB	BB	BB	BB	BB	BB	BB	BB	BB	BB	BB	BB	BB	BB	BB	BB	BB	BB	BB	BB
chr1_10248041_A_G	1	10248041	TOP	[A/G]	AA	AA	AA	AA	AA	AA	AA	AA	AA	AA	AA	AA	AA	AA	AA	AA	AA	AA	AA	AA	AA	AA	AA	AA	AA	AA	AA	AA	AA	AA	AA	AA	AA	AA	AA	AA	AA	AA	AA	AA	AA	AA	AA	AA	AA
chr1_10279151_A_G	1	10279151	TOP	[A/G]	AB	AB	AA	AA	AB	AB	BB	AA	BB	AB	BB	AB	AB	BB	AB	AA	BB	AB	BB	AB	AB	AB	AB	AB	AA	AB	AB	AA	AA	BB	AB	NC	AB	BB	BB	AB	BB	AB	AB	AA	AB	AB	BB	AB	BB
chr1_10306186_C_T	1	10306186	BOT	[T/C]	AA	AA	AA	AA	AA	AA	AA	AA	AA	AA	AA	AA	AA	AA	AA	AA	AA	AA	AA	AA	AA	AA	AA	AA	AA	AA	AA	AA	AA	AA	AA	AA	AA	AA	AA	AA	AA	AA	AA	AA	AA	AA	AA	AA	AA
chr1_10346685_G_T	1	10346685	BOT	[T/G]	BB	BB	BB	BB	BB	BB	BB	BB	BB	BB	BB	BB	BB	BB	BB	BB	BB	BB	BB	BB	BB	BB	BB	BB	BB	BB	BB	BB	BB	BB	BB	BB	BB	BB	BB	BB	BB	BB	BB	BB	BB	BB	BB	BB	BB
chr1_10348071_C_T	1	10348071	BOT	[T/C]	AB	AB	BB	BB	AB	AB	AA	BB	AA	AB	AA	AB	AB	AA	AB	BB	AA	AB	AA	AB	AB	AB	AB	AB	BB	AB	AB	BB	BB	AA	AB	NC	AB	AA	AA	AB	AA	AB	AB	BB	AB	AB	AA	AB	AA
chr1_10352546_C_T	1	10352546	TOP	[A/G]	BB	BB	BB	BB	BB	BB	BB	BB	BB	BB	BB	BB	BB	BB	BB	BB	BB	BB	BB	BB	BB	BB	BB	BB	BB	BB	BB	BB	BB	BB	BB	BB	BB	BB	BB	BB	BB	BB	BB	BB	BB	BB	BB	BB	BB
chr1_10384689_A_G	1	10384689	BOT	[T/C]	BB	BB	BB	BB	BB	BB	BB	BB	BB	BB	BB	BB	BB	BB	BB	BB	BB	BB	BB	BB	BB	BB	BB	BB	BB	BB	BB	BB	BB	BB	BB	BB	BB	BB	BB	BB	BB	BB	BB	BB	BB	BB	BB	BB	BB
chr1_10422513_C_T	1	10422513	TOP	[A/G]	AB	AB	BB	BB	AB	AB	AA	BB	AA	AB	AA	AB	AB	AA	AB	BB	AA	AB	AA	AB	AB	AB	AB	AB	BB	AB	AB	BB	BB	AA	AB	NC	AB	AA	AA	AB	AA	AB	AB	BB	AB	AB	AA	AB	AA
chr1_10492345_A_G	1	10492345	TOP	[A/G]	AB	AB	AA	AA	AB	AB	BB	AA	BB	AB	BB	AB	AB	BB	AB	AA	BB	AB	BB	AB	AB	AB	AB	AB	AA	AB	AB	AA	AA	BB	AB	NC	AB	BB	BB	AB	BB	AB	AB	AA	AB	AB	BB	AB	BB
be_T_C_chr1_10532241	1	10532241	TOP	[A/G]	AA	AA	AA	AA	AA	AA	AA	AA	AA	AA	AA	AA	AA	AA	AA	AA	AA	AA	AA	AA	AA	AA	AA	AA	AA	AA	AA	AA	AA	AA	AA	AA	AA	AA	AA	AA	AA	AA	AA	AA	AA	AA	AA	AA	AA
cn_G_A_chr1_10540772	1	10540772	BOT	[T/C]	BB	BB	BB	BB	BB	BB	BB	BB	BB	BB	BB	BB	BB	BB	BB	BB	BB	BB	BB	BB	BB	BB	BB	BB	BB	BB	BB	BB	BB	BB	BB	BB	BB	BB	BB	BB	BB	BB	BB	BB	BB	BB	BB	BB	BB
lb_C_A_chr1_10543015	1	10543015	BOT	[T/G]	BB	BB	BB	BB	BB	BB	BB	BB	BB	BB	BB	BB	BB	BB	BB	BB	BB	BB	BB	BB	BB	BB	BB	BB	BB	BB	BB	BB	BB	BB	BB	BB	BB	BB	BB	BB	BB	BB	BB	BB	BB	BB	BB	BB	BB
chr1_10567353_C_T	1	10567353	TOP	[A/G]	AB	AB	AA	AA	AB	BB	BB	AA	BB	AB	BB	AB	AB	BB	AB	AA	BB	AB	BB	AB	AB	AB	AB	AB	AA	AB	AB	AA	AA	BB	AB	NC	AB	BB	BB	AB	BB	AB	AB	AA	AB	AB	BB	AB	BB
chr1_10601560_C_T	1	10601560	TOP	[A/G]	AA	AA	AA	AA	AA	AA	AA	AA	AA	AA	AA	AA	AA	AA	AA	AA	AA	AA	AA	AA	AA	AA	AA	AA	AA	AA	AA	AA	AA	AA	AA	AA	AA	AA	AA	AA	AA	AA	AA	AA	AA	AA	AA	AA	AA
chr1_10636113_A_G	1	10636113	BOT	[T/C]	AB	AB	AA	AA	AB	BB	BB	AA	BB	AB	BB	AB	AB	BB	AB	AA	BB	AB	BB	AB	AB	AB	AB	AB	AA	AB	AB	AA	AA	BB	AB	NC	AB	BB	BB	AB	BB	AA	AB	AA	AB	AB	BB	AB	BB
chr1_10645223_A_C	1	10645223	BOT	[T/G]	BB	BB	BB	BB	BB	BB	BB	BB	BB	BB	BB	BB	BB	BB	BB	BB	BB	BB	BB	BB	BB	BB	BB	BB	BB	BB	BB	BB	BB	BB	BB	BB	BB	BB	BB	BB	BB	BB	BB	BB	BB	BB	BB	BB	BB
chr1_10686955_C_T	1	10686955	TOP	[A/G]	BB	BB	BB	BB	BB	BB	BB	BB	BB	BB	BB	BB	BB	BB	BB	BB	BB	BB	BB	BB	BB	BB	BB	BB	BB	BB	BB	BB	BB	BB	BB	NC	BB	BB	BB	BB	BB	BB	BB	BB	BB	BB	BB	BB	BB
chr1_10707573_A_G	1	10707573	BOT	[T/C]	AB	AB	AA	AA	AB	BB	BB	AA	BB	AB	BB	AB	AB	BB	AB	AA	BB	AB	BB	AB	AB	AB	AB	AB	AA	AB	AB	AA	AA	BB	AB	NC	AB	BB	BB	AB	BB	AA	AB	AA	AB	AA	BB	AB	BB
chr1_10751301_A_C	1	10751301	BOT	[T/G]	BB	BB	BB	BB	BB	BB	BB	BB	BB	BB	BB	BB	BB	BB	BB	BB	BB	BB	BB	BB	BB	BB	BB	BB	BB	BB	BB	BB	BB	BB	BB	BB	BB	BB	BB	BB	BB	BB	BB	BB	BB	BB	BB	BB	BB
chr1_10778771_A_G	1	10778771	TOP	[A/G]	BB	BB	BB	BB	BB	BB	BB	BB	BB	BB	BB	BB	BB	BB	BB	BB	BB	BB	BB	BB	BB	BB	BB	BB	BB	BB	BB	BB	BB	BB	BB	BB	BB	BB	BB	BB	BB	BB	BB	BB	BB	BB	BB	BB	BB
chr1_10815671_A_G	1	10815671	BOT	[T/C]	AB	AB	BB	BB	AB	AA	AA	BB	AA	AB	AA	AB	AB	AA	AB	BB	AA	AB	AA	AB	AB	AB	AB	AB	BB	AB	AB	BB	BB	AA	AB	NC	AB	AA	AA	AB	AA	BB	AB	BB	AB	BB	AA	AB	AA
chr1_10848183_C_T	1	10848183	TOP	[A/G]	AB	AB	AA	AA	AB	BB	BB	AA	BB	AB	BB	AB	AB	BB	AB	AA	BB	AB	BB	AB	AB	AB	AB	AB	AA	AB	AB	AA	AA	BB	AB	NC	AB	BB	BB	AB	BB	AA	AB	AA	AB	AA	BB	AB	BB
chr1_1087116_A_G	1	1087116	BOT	[T/C]	BB	BB	BB	BB	BB	BB	BB	BB	BB	BB	BB	BB	BB	BB	BB	BB	BB	BB	BB	BB	BB	BB	BB	BB	BB	BB	BB	BB	BB	BB	BB	BB	BB	BB	BB	BB	BB	BB	BB	BB	BB	BB	BB	BB	BB
chr1_10879621_G_T	1	10879621	TOP	[A/C]	BB	BB	BB	BB	BB	BB	BB	BB	BB	BB	BB	BB	BB	BB	BB	BB	BB	BB	BB	BB	BB	BB	BB	BB	BB	BB	BB	BB	BB	BB	BB	BB	BB	BB	BB	BB	BB	BB	BB	BB	BB	BB	BB	BB	BB
chr1_10913571_C_T	1	10913571	TOP	[A/G]	BB	BB	BB	BB	BB	BB	BB	BB	BB	BB	BB	BB	BB	BB	BB	BB	BB	BB	BB	BB	BB	BB	BB	BB	BB	BB	BB	BB	BB	BB	BB	BB	BB	BB	BB	BB	BB	BB	BB	BB	BB	BB	BB	BB	BB
chr1_10976077_G_T	1	10976077	TOP	[A/C]	AA	AA	AA	AA	AA	AA	AA	AA	AA	AA	AA	AA	AA	AA	AA	AA	AA	AA	AA	AA	AA	AA	AA	AA	AA	AA	AA	AA	AA	AA	AA	AA	AA	AA	AA	AA	AA	AA	AA	AA	AA	AA	AA	AA	AA
chr1_11007311_G_T	1	11007311	TOP	[A/C]	AB	AB	BB	BB	AB	AA	AA	BB	AA	AB	AA	AB	AB	AA	AB	BB	AA	AB	AA	AB	AB	AB	AB	AB	BB	AB	AB	BB	BB	AA	AB	AB	AB	AA	AA	AB	AA	BB	AB	BB	AB	BB	AA	AB	AA
chr1_11010707_G_T	1	11010707	BOT	[T/G]	AA	AA	AA	AA	AA	AA	AA	AA	AA	AA	AA	AA	AA	AA	AA	AA	AA	AA	AA	AA	AA	AA	AA	AA	AA	AA	AA	AA	AA	AA	AA	AA	AA	AA	AA	AA	AA	AA	AA	AA	AA	AA	AA	AA	AA
mu_s_T_C_chr1_11011678	1	11011678	BOT	[T/C]	AA	AA	AA	AA	AA	AA	AA	AA	AA	AA	AA	AA	AA	AA	AA	AA	AA	AA	AA	AA	AA	AA	AA	AA	AA	AA	AA	AA	AA	AA	AA	AA	AA	AA	AA	AA	AA	AA	AA	AA	AA	AA	AA	AA	AA
lb_A_G_chr1_11023569	1	11023569	TOP	[A/G]	AA	AA	AA	AA	AA	AA	AA	AA	AA	AA	AA	AA	AA	AA	AA	AA	AA	AA	AA	AA	AA	AA	AA	AA	AA	AA	AA	AA	AA	AA	AA	AA	AA	AA	AA	AA	AA	AA	AA	AA	AA	AA	AA	AA	AA
chr1_11027925_C_T	1	11027925	TOP	[A/G]	AA	AA	AA	AA	AA	AA	AA	AA	AA	AA	AA	AA	AA	AA	AA	AA	AA	AA	AA	AA	AA	AA	AA	AA	AA	AA	AA	AA	AA	AA	AA	AA	AA	AA	AA	AA	AA	AA	AA	AA	AA	AA	AA	AA	AA
ae_A_C_chr1_11028575	1	11028575	BOT	[T/G]	AA	AA	AA	AA	AA	AA	AA	AA	AA	AA	AA	AA	AA	AA	AA	AA	AA	AA	AA	AA	AA	AA	AA	AA	AA	AA	AA	AA	AA	AA	AA	AA	AA	AA	AA	AA	AA	AA	AA	AA	AA	AA	AA	AA	AA
chr1_11183949_C_T	1	11183949	BOT	[T/C]	BB	BB	NC	NC	BB	BB	BB	NC	BB	BB	BB	BB	BB	BB	BB	NC	BB	BB	BB	BB	BB	BB	BB	BB	NC	BB	BB	NC	NC	BB	BB	BB	BB	BB	BB	BB	BB	NC	BB	NC	BB	NC	BB	BB	BB
chr1_11313468_C_T	1	11313468	TOP	[A/G]	AB	AB	BB	BB	AB	AA	AA	BB	AA	AB	AA	AB	AB	AA	AB	BB	AA	AB	AB	AB	AB	AB	AB	AB	BB	AB	AB	BB	BB	AA	AB	NC	AB	AA	AA	AB	AA	BB	AB	BB	AB	BB	AB	AB	AA
chr1_11324024_A_G	1	11324024	TOP	[A/G]	BB	BB	BB	BB	BB	BB	BB	BB	BB	BB	BB	BB	BB	BB	BB	BB	BB	BB	BB	BB	BB	BB	BB	BB	BB	BB	BB	BB	BB	BB	BB	BB	BB	BB	BB	BB	BB	BB	BB	BB	BB	BB	BB	BB	BB
chr1_11333731_C_T	1	11333731	TOP	[A/G]	AB	AB	AA	AA	AB	BB	BB	AA	BB	AB	BB	AB	AB	BB	AB	AA	BB	AB	AB	AB	AB	AB	AB	AB	AA	AB	AB	AA	AA	BB	AB	NC	AB	BB	BB	AB	BB	AA	AB	AA	AB	AA	AB	AB	BB
chr1_11384586_A_G	1	11384586	BOT	[T/C]	BB	BB	BB	BB	BB	BB	BB	BB	BB	BB	BB	BB	BB	BB	BB	BB	BB	BB	BB	BB	BB	BB	BB	BB	BB	BB	BB	BB	BB	BB	BB	BB	BB	BB	BB	BB	BB	BB	BB	BB	BB	BB	BB	BB	BB
chr1_11414632_C_T	1	11414632	TOP	[A/G]	BB	BB	BB	BB	BB	BB	BB	BB	BB	BB	BB	BB	BB	BB	BB	BB	BB	BB	BB	BB	BB	BB	BB	BB	BB	BB	BB	BB	BB	BB	BB	BB	BB	BB	BB	BB	BB	BB	BB	BB	BB	BB	BB	BB	BB
chr1_11428082_C_T	1	11428082	TOP	[A/G]	BB	BB	BB	BB	BB	BB	BB	BB	BB	BB	BB	BB	BB	BB	BB	BB	BB	BB	BB	BB	BB	BB	BB	BB	BB	BB	BB	BB	BB	BB	BB	BB	BB	BB	BB	BB	BB	BB	BB	BB	BB	BB	BB	BB	BB
ae_G_T_chr1_11452836	1	11452836	BOT	[T/G]	BB	BB	BB	BB	BB	BB	BB	BB	BB	BB	BB	BB	BB	BB	BB	BB	BB	BB	BB	BB	BB	BB	BB	BB	BB	BB	BB	BB	BB	BB	BB	BB	BB	BB	BB	BB	BB	BB	BB	BB	BB	BB	BB	BB	BB
chr1_11457396_C_T	1	11457396	TOP	[A/G]	BB	BB	BB	BB	BB	BB	BB	BB	BB	BB	BB	BB	BB	BB	BB	BB	BB	BB	BB	BB	BB	BB	BB	BB	BB	BB	BB	BB	BB	BB	BB	BB	BB	BB	BB	BB	BB	BB	BB	BB	BB	BB	BB	BB	BB
cn_T_G_chr1_11473611	1	11473611	TOP	[A/C]	AA	AA	AA	AA	AA	AA	AA	AA	AA	AA	AA	AA	AA	AA	AA	AA	AA	AA	AA	AA	AA	AA	AA	AA	AA	AA	AA	AA	AA	AA	AA	AA	AA	AA	AA	AA	AA	AA	AA	AA	AA	AA	AA	AA	AA
be_G_A_chr1_11505475	1	11505475	BOT	[T/C]	BB	BB	BB	BB	BB	BB	BB	BB	BB	BB	BB	BB	BB	BB	BB	BB	BB	BB	BB	BB	BB	BB	BB	BB	BB	BB	BB	BB	BB	BB	BB	BB	BB	BB	BB	BB	BB	BB	BB	BB	BB	BB	BB	BB	BB
lb_C_T_chr1_11518301	1	11518301	TOP	[A/G]	BB	BB	BB	BB	BB	BB	BB	BB	BB	BB	BB	BB	BB	BB	BB	BB	BB	BB	BB	BB	BB	BB	BB	BB	BB	BB	BB	BB	BB	BB	BB	BB	BB	BB	BB	BB	BB	BB	BB	BB	BB	BB	BB	BB	BB
mu_s_A_G_chr1_11525271	1	11525271	BOT	[T/C]	AA	AA	AA	AA	AA	AA	AA	AA	AA	AA	AA	AA	AA	AA	AA	AA	AA	AA	AA	AA	AA	AA	AA	AA	AA	AA	AA	AA	AA	AA	AA	AA	AA	AA	AA	AA	AA	AA	AA	AA	AA	AA	AA	AA	AA
chr1_11527964_A_G	1	11527964	TOP	[A/G]	BB	BB	BB	BB	BB	BB	BB	BB	BB	BB	BB	BB	BB	BB	BB	BB	BB	BB	BB	BB	BB	BB	BB	BB	BB	BB	BB	BB	BB	BB	BB	BB	BB	BB	BB	BB	BB	BB	BB	BB	BB	BB	BB	BB	BB
chr1_11576311_A_C	1	11576311	TOP	[A/C]	AA	AA	AA	AA	AA	AA	AA	AA	AA	AA	AA	AA	AA	AA	AA	AA	AA	AA	AA	AA	AA	AA	AA	AA	AA	AA	AA	AA	AA	AA	AA	AA	AA	AA	AA	AA	AA	AA	AA	AA	AA	AA	AA	AA	AA
chr1_11600448_A_G	1	11600448	TOP	[A/G]	AA	AA	AA	AA	AA	AA	AA	AA	AA	AA	AA	AA	AA	AA	AA	AA	AA	AA	AA	AA	AA	AA	AA	AA	AA	AA	AA	AA	AA	AA	AA	AA	AA	AA	AA	AA	AA	AA	AA	AA	AA	AA	AA	AA	AA
chr1_11622136_A_G	1	11622136	BOT	[T/C]	AB	AB	AA	AA	AB	BB	BB	AA	BB	AB	BB	AB	AB	BB	AB	AA	BB	AB	AB	AB	AB	AB	AB	AB	AA	AB	AB	AA	AB	BB	AB	NC	AB	BB	BB	AB	BB	AA	AB	AA	AB	AA	AB	AB	BB
chr1_1163551_A_G	1	1163551	BOT	[T/C]	BB	BB	AB	AA	AB	AB	AB	AB	AA	AB	BB	AB	AB	AB	BB	AA	AA	BB	BB	AB	AB	AB	BB	BB	AA	AB	AA	AB	AA	AB	BB	BB	AB	AB	AB	AB	AB	BB	AB	AB	AB	AB	BB	AB	BB
chr1_1164056_G_T	1	1164056	TOP	[A/C]	AA	AA	AB	BB	AB	AB	AB	AB	BB	AB	AA	AB	AB	AB	AA	BB	BB	AA	AA	AB	AB	AB	AA	AA	BB	AB	BB	AB	BB	AB	AA	NC	AB	AB	AB	AB	AB	AA	AB	AB	AB	AB	AA	AB	AA
chr1_11675585_A_G	1	11675585	TOP	[A/G]	BB	BB	BB	BB	BB	BB	BB	BB	BB	BB	BB	BB	BB	BB	BB	BB	BB	BB	BB	BB	BB	BB	BB	BB	BB	BB	BB	BB	BB	BB	BB	BB	BB	BB	BB	BB	BB	BB	BB	BB	BB	BB	BB	BB	BB
chr1_11680867_A_G	1	11680867	TOP	[A/G]	AA	AA	AA	AA	AA	AA	AA	AA	AA	AA	AA	AA	AA	AA	AA	AA	AA	AA	AA	AA	AA	AA	AA	AA	AA	AA	AA	AA	AA	AA	AA	NC	AA	AA	AA	AA	AA	AA	AA	AA	AA	AA	AA	AA	AA
chr1_11709592_A_G	1	11709592	TOP	[A/G]	BB	BB	BB	BB	BB	BB	BB	BB	BB	BB	BB	BB	BB	BB	BB	BB	BB	BB	BB	BB	BB	BB	BB	BB	BB	BB	BB	BB	BB	BB	BB	BB	BB	BB	BB	BB	BB	BB	BB	BB	BB	BB	BB	BB	BB
chr1_1173370_G_T	1	1173370	TOP	[A/C]	AA	AA	AA	AA	AA	AA	AA	AA	AA	AA	AA	AA	AA	AA	AA	AA	AA	AA	AA	AA	AA	AA	AA	AA	AA	AA	AA	AA	AA	AA	AA	AA	AA	AA	AA	AA	AA	AA	AA	AA	AA	AA	AA	AA	AA
chr1_11738703_C_T	1	11738703	BOT	[T/C]	BB	BB	BB	BB	BB	BB	BB	BB	BB	BB	BB	BB	BB	BB	BB	BB	BB	BB	BB	BB	BB	BB	BB	BB	BB	BB	BB	BB	BB	BB	BB	BB	BB	BB	BB	BB	BB	BB	BB	BB	BB	BB	BB	BB	BB
chr1_11739249_C_T	1	11739249	BOT	[T/C]	AA	AA	AA	AA	AA	AA	AA	AA	AA	AA	AA	AA	AA	AA	AA	AA	AA	AA	AA	AA	AA	AA	AA	AA	AA	AA	AA	AA	AA	AA	AA	NC	AA	AA	AA	AA	AA	AA	AA	AA	AA	AA	AA	AA	AA
chr1_11818337_C_T	1	11818337	TOP	[A/G]	AA	AA	AA	AA	AA	AA	AA	AA	AA	AA	AA	AA	AA	AA	AA	AA	AA	AA	AA	AA	AA	AA	AA	AA	AA	AA	AA	AA	AA	AA	AA	AA	AA	AA	AA	AA	AA	AA	AA	AA	AA	AA	AA	AA	AA
chr1_11853324_A_G	1	11853324	TOP	[A/G]	BB	BB	BB	BB	BB	BB	BB	BB	BB	BB	BB	BB	BB	BB	BB	BB	BB	BB	BB	BB	BB	BB	BB	BB	BB	BB	BB	BB	BB	BB	BB	BB	BB	BB	BB	BB	BB	BB	BB	BB	BB	BB	BB	BB	BB
chr1_11858923_A_G	1	11858923	TOP	[A/G]	AB	AB	AA	AA	AB	BB	BB	AB	BB	AB	BB	AB	AB	BB	AB	AA	BB	AB	AB	BB	AB	AB	AB	AB	AA	AB	AB	AA	AB	BB	AB	BB	AB	BB	BB	AB	BB	AA	AB	AA	AB	AA	AB	AB	BB
chr1_11874008_C_T	1	11874008	BOT	[T/C]	AA	AA	AA	AA	AA	AA	AA	AA	AA	AA	AA	AA	AA	AA	AA	AA	AA	AA	AA	AA	AA	AA	AA	AA	AA	AA	AA	AA	AA	AA	AA	AA	AA	AA	AA	AA	AA	AA	AA	AA	AA	AA	AA	AA	AA
chr1_119067_G_T	1	119067	BOT	[T/G]	AA	AA	AA	AA	AA	AA	AA	AA	AA	AA	AA	AA	AA	AA	AA	AA	AA	AA	AA	AA	AA	AA	AA	AA	AA	AA	AA	AA	AA	AA	AA	AA	AA	AA	AA	AA	AA	AA	AA	AA	AA	AA	AA	AA	AA
chr1_11969030_A_G	1	11969030	TOP	[A/G]	BB	BB	BB	BB	BB	BB	BB	BB	BB	BB	BB	BB	BB	BB	BB	BB	BB	BB	BB	BB	BB	BB	BB	BB	BB	BB	BB	BB	BB	BB	BB	BB	BB	BB	BB	BB	BB	BB	BB	BB	BB	BB	BB	BB	BB
chr1_11988940_A_C	1	11988940	TOP	[A/C]	AA	AA	AA	AA	AA	AA	AA	AA	AA	AA	AA	AA	AA	AA	AA	AA	AA	AA	AA	AA	AA	AA	AA	AA	AA	AA	AA	AA	AA	AA	AA	AA	AA	AA	AA	AA	AA	AA	AA	AA	AA	AA	AA	AA	AA
chr1_11996175_C_T	1	11996175	BOT	[T/C]	BB	BB	BB	BB	BB	BB	BB	BB	BB	BB	BB	BB	BB	BB	BB	BB	BB	BB	BB	BB	BB	BB	BB	BB	BB	BB	BB	BB	BB	BB	BB	BB	BB	BB	BB	BB	BB	BB	BB	BB	BB	BB	BB	BB	BB
cn_T_C_chr1_11998584	1	11998584	TOP	[A/G]	AA	AA	AA	AA	AA	AA	AA	AA	AA	AA	AA	AA	AA	AA	AA	AA	AA	AA	AA	AA	AA	AA	AA	AA	AA	AA	AA	AA	AA	AA	AA	AA	AA	AA	AA	AA	AA	AA	AA	AA	AA	AA	AA	AA	AA
lb_G_A_chr1_12005500	1	12005500	BOT	[T/C]	BB	BB	BB	BB	BB	BB	BB	BB	BB	BB	BB	BB	BB	BB	BB	BB	BB	BB	BB	BB	BB	BB	BB	BB	BB	BB	BB	BB	BB	BB	BB	BB	BB	BB	BB	BB	BB	BB	BB	BB	BB	BB	BB	BB	BB
ae_A_G_chr1_12009877	1	12009877	TOP	[A/G]	AA	AA	AA	AA	AA	AA	AA	AA	AA	AA	AA	AA	AA	AA	AA	AA	AA	AA	AA	AA	AA	AA	AA	AA	AA	AA	AA	AA	AA	AA	AA	AA	AA	AA	AA	AA	AA	AA	AA	AA	AA	AA	AA	AA	AA
chr1_12012741_C_T	1	12012741	TOP	[A/G]	AA	AA	AA	AA	AA	AA	AA	AA	AA	AA	AA	AA	AA	AA	AA	AA	AA	AA	AA	AA	AA	AA	AA	AA	AA	AA	AA	AA	AA	AA	AA	AA	AA	AA	AA	AA	AA	AA	AA	AA	AA	AA	AA	AA	AA
chr1_12046683_A_G	1	12046683	TOP	[A/G]	BB	BB	BB	BB	BB	BB	BB	BB	BB	BB	BB	BB	BB	BB	BB	BB	BB	BB	BB	BB	BB	BB	BB	BB	BB	BB	BB	BB	BB	BB	BB	BB	BB	BB	BB	BB	BB	BB	BB	BB	BB	BB	BB	BB	BB
chr1_12056309_C_T	1	12056309	BOT	[T/C]	AA	AA	AA	AA	AA	AA	AA	AA	AA	AA	AA	AA	AA	AA	AA	AA	AA	AA	AA	AA	AA	AA	AA	AA	AA	AA	AA	AA	AA	AA	AA	AA	AA	AA	AA	AA	AA	AA	AA	AA	AA	AA	AA	AA	AA
ae_G_T_chr1_1206278	1	1206278	TOP	[A/C]	BB	BB	BB	BB	BB	BB	BB	BB	BB	BB	BB	BB	BB	BB	BB	BB	BB	BB	BB	BB	BB	BB	BB	BB	BB	BB	BB	BB	BB	BB	BB	BB	BB	BB	BB	BB	BB	BB	BB	BB	BB	BB	BB	BB	BB
SNP517_224	1	12081808	TOP	[A/G]	AB	AB	BB	BB	AB	AA	AA	AB	AA	AB	AA	AB	AB	AA	AB	BB	AA	AB	AB	AA	AB	AB	AB	AB	BB	AB	AB	BB	AB	AA	AB	AB	AB	AA	AA	AB	AA	BB	AB	BB	AB	BB	AB	AB	AA
chr1_12092270_C_T	1	12092270	BOT	[T/C]	AA	AA	AA	AA	AA	AA	AA	AA	AA	AA	AA	AA	AA	AA	AA	AA	AA	AA	AA	AA	AA	AA	AA	AA	AA	AA	AA	AA	AA	AA	AA	AA	AA	AA	AA	AA	AA	AA	AA	AA	AA	AA	AA	AA	AA
cn_C_T_chr1_1211000	1	1211000	BOT	[T/C]	BB	BB	AB	AA	AB	AB	AB	AB	AA	AB	BB	AB	AB	AB	BB	AA	AA	BB	BB	AB	AB	AB	BB	BB	AA	AB	AA	AB	AA	AB	BB	NC	AB	AB	BB	AB	BB	BB	AB	AB	AB	AB	BB	AB	BB
chr1_12168156_C_T	1	12168156	BOT	[T/C]	AB	AB	BB	BB	AB	AA	AA	AB	AA	NC	AA	AB	AB	AA	AB	BB	AA	AB	AB	AA	AB	AB	AB	AB	BB	AB	AB	BB	AB	AA	AB	AB	AB	AA	AA	AB	AA	BB	AB	BB	AB	BB	AB	AB	AA
li_A_G_chr1_12170046	1	12170046	TOP	[A/G]	AA	AA	AA	AA	AA	AA	AA	AA	AA	AA	AA	AA	AA	AA	AA	AA	AA	AA	AA	AA	AA	AA	AA	AA	AA	AA	AA	AA	AA	AA	AA	AA	AA	AA	AA	AA	AA	AA	AA	AA	AA	AA	AA	AA	AA
chr1_12212304_C_T	1	12212304	BOT	[T/C]	BB	BB	BB	BB	BB	BB	BB	BB	BB	BB	BB	BB	BB	BB	BB	BB	BB	BB	BB	BB	BB	BB	BB	BB	BB	BB	BB	BB	BB	BB	BB	BB	BB	BB	BB	BB	BB	BB	BB	BB	BB	BB	BB	BB	BB
chr1_12214564_A_G	1	12214564	BOT	[T/C]	AA	AA	AA	AA	AA	AA	AA	AA	AA	AA	AA	AA	AA	AA	AA	AA	AA	AA	AA	AA	AA	AA	AA	AA	AA	AA	AA	AA	AA	AA	AA	AA	AA	AA	AA	AA	AA	AA	AA	AA	AA	AA	AA	AA	AA
chr1_1222768_G_T	1	1222768	TOP	[A/C]	AA	AA	AA	AA	AA	AA	AA	AA	AA	AA	AA	AA	AA	AA	AA	AA	AA	AA	AA	AA	AA	AA	AA	AA	AA	AA	AA	AA	AA	AA	AA	AA	AA	AA	AA	AA	AA	AA	AA	AA	AA	AA	AA	AA	AA
chr1_12241211_A_G	1	12241211	TOP	[A/G]	BB	BB	BB	BB	BB	BB	BB	BB	BB	BB	BB	BB	BB	BB	BB	BB	BB	BB	BB	BB	BB	BB	BB	BB	BB	BB	BB	BB	BB	BB	BB	NC	BB	BB	BB	BB	BB	BB	BB	BB	BB	BB	BB	BB	BB
lb_A_G_chr1_1225518	1	1225518	BOT	[T/C]	AA	AA	AA	AA	AA	AA	AA	AA	AA	AA	AA	AA	AA	AA	AA	AA	AA	AA	AA	AA	AA	AA	AA	AA	AA	AA	AA	AA	AA	AA	AA	AA	AA	AA	AA	AA	AA	AA	AA	AA	AA	AA	AA	AA	AA
chr1_12284201_G_T	1	12284201	TOP	[A/C]	BB	BB	BB	BB	BB	BB	BB	BB	BB	BB	BB	BB	BB	BB	BB	BB	BB	BB	BB	BB	BB	BB	BB	BB	BB	BB	BB	BB	BB	BB	BB	BB	BB	BB	BB	BB	BB	BB	BB	BB	BB	BB	BB	BB	BB
chr1_12352034_C_T	1	12352034	TOP	[A/G]	BB	BB	BB	BB	BB	BB	BB	BB	BB	BB	BB	BB	BB	BB	BB	BB	BB	BB	BB	BB	BB	BB	BB	BB	BB	BB	BB	BB	BB	BB	BB	NC	BB	BB	BB	BB	BB	BB	BB	BB	BB	BB	BB	BB	BB
chr1_12361877_A_G	1	12361877	BOT	[T/C]	AA	AA	AA	AA	AA	AA	AA	AA	AA	AA	AA	AA	AA	AA	AA	AA	AA	AA	AA	AA	AA	AA	AA	AA	AA	AA	AA	AA	AA	AA	AA	AA	AA	AA	AA	AA	AA	AA	AA	AA	AA	AA	AA	AA	AA
chr1_12400623_A_G	1	12400623	TOP	[A/G]	BB	BB	BB	BB	BB	BB	BB	BB	BB	BB	BB	BB	BB	BB	BB	BB	BB	BB	BB	BB	BB	BB	BB	BB	BB	BB	BB	BB	BB	BB	BB	BB	BB	BB	BB	BB	BB	BB	BB	BB	BB	BB	BB	BB	BB
mu_o_A_G_chr1_12406900	1	12406900	TOP	[A/G]	AA	AA	AA	AA	AA	AA	AA	AA	AA	AA	AA	AA	AA	AA	AA	AA	AA	AA	AA	AA	AA	AA	AA	AA	AA	AA	AA	AA	AA	AA	AA	AA	AA	AA	AA	AA	AA	AA	AA	AA	AA	AA	AA	AA	AA
mu_o_G_A_chr1_12407396	1	12407396	BOT	[T/C]	BB	BB	BB	BB	BB	BB	BB	BB	BB	BB	BB	BB	BB	BB	BB	BB	BB	BB	BB	BB	BB	BB	BB	BB	BB	BB	BB	BB	BB	BB	BB	BB	BB	BB	BB	BB	BB	BB	BB	BB	BB	BB	BB	BB	BB
cn_C_A_chr1_12492185	1	12492185	TOP	[A/C]	AB	AB	AB	AB	AB	BB	BB	AB	BB	AB	BB	AB	AB	BB	AB	AB	BB	AB	AB	BB	AB	AB	AB	AB	AB	AB	AB	AB	AB	BB	AB	AB	AB	BB	BB	AB	BB	AB	AB	AB	AB	NC	AB	AB	BB
ae_G_T_chr1_12492270	1	12492270	TOP	[A/C]	BB	BB	BB	BB	BB	BB	BB	BB	BB	BB	BB	BB	BB	BB	BB	BB	BB	BB	BB	BB	BB	BB	BB	BB	BB	BB	BB	BB	BB	BB	BB	BB	BB	BB	BB	BB	BB	BB	BB	BB	BB	BB	BB	BB	BB
lb_A_G_chr1_12493897	1	12493897	TOP	[A/G]	AB	AB	BB	BB	AB	AA	AA	AB	AA	NC	AA	AB	AB	AA	AB	BB	AA	AB	AB	AA	AB	AB	AB	AB	BB	AB	AB	BB	AB	AA	AB	AB	AB	AA	AA	AB	AA	BB	AB	BB	AB	BB	AB	AB	AA
chr1_12552777_A_G	1	12552777	BOT	[T/C]	AA	AA	AA	AA	AA	AA	AA	AA	AA	AA	AA	AA	AA	AA	AA	AA	AA	AA	AA	AA	AA	AA	AA	AA	AA	AA	AA	AA	AA	AA	AA	NC	AA	AA	AA	AA	AA	AA	AA	AA	AA	AA	AA	AA	AA
chr1_12560573_A_G	1	12560573	BOT	[T/C]	AB	AB	BB	BB	NC	AA	AA	AB	AA	NC	AA	AB	AB	AA	AB	BB	AA	AB	AB	AA	AB	AB	AB	AB	BB	AB	AB	BB	AB	AA	AB	AB	AB	AA	AA	AB	AA	BB	AB	BB	AB	BB	AB	AB	AA
SNP1439_90	1	1259215	TOP	[A/G]	AA	AA	AA	AA	AA	AA	AA	AA	AA	AA	AA	AA	AA	AA	AA	AA	AA	AA	AA	AA	AA	AA	AA	AA	AA	AA	AA	AA	AA	AA	AA	AA	AA	AA	AA	AA	AA	AA	AA	AA	AA	AA	AA	AA	AA
chr1_1261165_A_C	1	1261165	BOT	[T/G]	BB	BB	BB	BB	BB	BB	BB	BB	BB	BB	BB	BB	BB	BB	BB	BB	BB	BB	BB	BB	BB	BB	BB	BB	BB	BB	BB	BB	BB	BB	BB	BB	BB	BB	BB	BB	BB	BB	BB	BB	BB	BB	BB	BB	BB
chr1_12648747_A_C	1	12648747	TOP	[A/C]	AA	AA	AA	AA	AA	AA	AA	AA	AA	AA	AA	AA	AA	AA	AA	AA	AA	AA	AA	AA	AA	AA	AA	AA	AA	AA	AA	AA	AA	AA	AA	AA	AA	AA	AA	AA	AA	AA	AA	AA	AA	AA	AA	AA	AA
chr1_12655926_A_C	1	12655926	TOP	[A/C]	AB	AB	AA	AA	NC	BB	BB	AB	BB	AB	BB	AB	AB	BB	AB	AA	BB	AB	AB	BB	AB	AB	AB	AB	AA	AB	AB	AA	AB	BB	AB	AB	AB	BB	BB	AB	BB	AA	AB	AA	AB	AA	AB	AB	BB
chr1_12668414_A_G	1	12668414	TOP	[A/G]	BB	BB	BB	BB	BB	BB	BB	BB	BB	BB	BB	BB	BB	BB	BB	BB	BB	BB	BB	BB	BB	BB	BB	BB	BB	BB	BB	BB	BB	BB	BB	BB	BB	BB	BB	BB	BB	BB	BB	BB	BB	BB	BB	BB	BB
mu_o_A_G_chr1_1274657	1	1274657	BOT	[T/C]	AA	AA	AA	AA	AA	AA	AA	AA	AA	AA	AA	AA	AA	AA	AA	AA	AA	AA	AA	AA	AA	AA	AA	AA	AA	AA	AA	AA	AA	AA	AA	AA	AA	AA	AA	AA	AA	AA	AA	AA	AA	AA	AA	AA	AA
chr1_1304398_C_T	1	1304398	BOT	[T/C]	AA	AA	AA	AA	AA	AA	AA	AA	AA	AA	AA	AA	AA	AA	AA	AA	AA	AA	AA	AA	AA	AA	AA	AA	AA	AA	AA	AA	AA	AA	AA	AA	AA	AA	AA	AA	AA	AA	AA	AA	AA	AA	AA	AA	AA
chr1_1336961_G_T	1	1336961	TOP	[A/C]	BB	BB	BB	BB	BB	BB	BB	BB	BB	BB	BB	BB	BB	BB	BB	BB	BB	BB	BB	BB	BB	BB	BB	BB	BB	BB	BB	BB	BB	BB	BB	BB	BB	BB	BB	BB	BB	BB	BB	BB	BB	BB	BB	BB	BB
cn_T_C_chr1_13469251	1	13469251	BOT	[T/C]	AA	AA	AA	AA	AA	AA	AA	AA	AA	AA	AA	AA	AA	AA	AA	AA	AA	AA	AA	AA	AA	AA	AA	AA	AA	AA	AA	AA	AA	AA	AA	AA	AA	AA	AA	AA	AA	AA	AA	AA	AA	AA	AA	AA	AA
ae_C_T_chr1_13587632	1	13587632	BOT	[T/C]	BB	BB	BB	BB	BB	BB	BB	BB	BB	BB	BB	BB	BB	BB	BB	BB	BB	BB	BB	BB	BB	BB	BB	BB	BB	BB	BB	BB	BB	BB	BB	BB	BB	BB	BB	BB	BB	BB	BB	BB	BB	BB	BB	BB	BB
chr1_13669728_C_T	1	13669728	BOT	[T/C]	BB	BB	BB	BB	BB	BB	BB	BB	BB	BB	BB	BB	BB	BB	BB	BB	BB	BB	BB	BB	BB	BB	BB	BB	BB	BB	BB	BB	BB	BB	BB	BB	BB	BB	BB	BB	BB	BB	BB	BB	BB	BB	BB	BB	BB
chr1_13680311_A_G	1	13680311	TOP	[A/G]	AA	AA	AA	AA	AA	AA	AA	AA	AA	AA	AA	AA	AA	AA	AA	AA	AA	AA	AA	AA	AA	AA	AA	AA	AA	AA	AA	AA	AA	AA	AA	AA	AA	AA	AA	AA	AA	AA	AA	AA	AA	AA	AA	AA	AA
mu_s_A_G_chr1_13715815	1	13715815	TOP	[A/G]	AA	AA	AA	AA	AA	AA	AA	AA	AA	AA	AA	AA	AA	AA	AA	AA	AA	AA	AA	AA	AA	AA	AA	AA	AA	AA	AA	AA	AA	AA	AA	AA	AA	AA	AA	AA	AA	AA	AA	AA	AA	AA	AA	AA	AA
chr1_1372222_C_T	1	1372222	BOT	[T/C]	AA	AA	AA	AA	AA	AA	AA	AA	AA	AA	AA	AA	AA	AA	AA	AA	AA	AA	AA	AA	AA	AA	AA	AA	AA	AA	AA	AA	AA	AA	AA	AA	AA	AA	AA	AA	AA	AA	AA	AA	AA	AA	AA	AA	AA
chr1_13811691_C_T	1	13811691	BOT	[T/C]	AA	AA	AA	AA	AA	AA	AA	AA	AA	AA	AA	AA	AA	AA	AA	AA	AA	AA	AA	AA	AA	AA	AA	AA	AA	AA	AA	AA	AA	AA	AA	AA	AA	AA	AA	AA	AA	AA	AA	AA	AA	AA	AA	AA	AA
chr1_13836783_C_T	1	13836783	TOP	[A/G]	AB	AB	BB	BB	AB	AA	AA	AB	AA	BB	AA	AB	AB	AA	AB	BB	AA	AB	AB	AA	AB	AB	AB	AB	BB	AB	AB	BB	AB	AA	AB	AB	AB	AA	AA	AB	NC	BB	AB	BB	AB	BB	AB	AB	AA
chr1_13920137_A_G	1	13920137	BOT	[T/C]	AB	AB	AA	AA	AB	BB	BB	AB	BB	AA	BB	AB	AB	BB	AB	AA	BB	AB	AB	BB	AB	AB	AB	AB	AA	AB	AB	AA	AB	BB	AB	AB	AB	BB	BB	AB	BB	AA	AB	AA	AB	AA	AB	AB	BB
chr1_13921759_G_T	1	13921759	BOT	[T/G]	BB	BB	BB	BB	BB	BB	BB	BB	BB	BB	BB	BB	BB	BB	BB	BB	BB	BB	BB	BB	BB	BB	BB	BB	BB	BB	BB	BB	BB	BB	BB	BB	BB	BB	BB	BB	BB	BB	BB	BB	BB	BB	BB	BB	BB
lb_C_T_chr1_13961488	1	13961488	TOP	[A/G]	AB	AB	AA	AA	AB	BB	BB	AB	BB	AA	BB	AB	AB	BB	AB	AA	BB	AB	AB	BB	AB	AB	AB	AB	AA	AB	AB	AA	AB	BB	AB	AB	AB	BB	BB	AB	BB	AA	AB	AA	AB	AA	AB	AB	BB
ae_G_A_chr1_13964176	1	13964176	BOT	[T/C]	BB	BB	BB	BB	BB	BB	BB	BB	BB	BB	BB	BB	BB	BB	BB	BB	BB	BB	BB	BB	BB	BB	BB	BB	BB	BB	BB	BB	BB	BB	BB	BB	BB	BB	BB	BB	BB	BB	BB	BB	BB	BB	BB	BB	BB
be_T_G_chr1_13967545	1	13967545	TOP	[A/C]	AA	AA	AA	AA	AA	AA	AA	AA	AA	AA	AA	AA	AA	AA	AA	AA	AA	AA	AA	AA	AA	AA	AA	AA	AA	AA	AA	AA	AA	AA	AA	AA	AA	AA	AA	AA	AA	AA	AA	AA	AA	AA	AA	AA	AA
chr1_13972387_G_T	1	13972387	BOT	[T/G]	AA	AA	AA	AA	AA	AA	AA	AA	AA	AA	AA	AA	AA	AA	AA	AA	AA	AA	AA	AA	AA	AA	AA	AA	AA	AA	AA	AA	AA	AA	AA	AA	AA	AA	AA	AA	AA	AA	AA	AA	AA	AA	AA	AA	AA
chr1_13989145_A_C	1	13989145	TOP	[A/C]	AA	AA	AA	AA	AA	AA	AA	AA	AA	AA	AA	AA	AA	AA	AA	AA	AA	AA	AA	AA	AA	AA	AA	AA	AA	AA	AA	AA	AA	AA	AA	AA	AA	AA	AA	AA	AA	AA	AA	AA	AA	AA	AA	AA	AA
chr1_14006648_C_T	1	14006648	BOT	[T/C]	AA	AA	AA	AA	AA	AA	AA	AA	AA	AA	AA	AA	AA	AA	AA	AA	AA	AA	AA	AA	AA	AA	AA	AA	AA	AA	AA	AA	AA	AA	AA	AA	AA	AA	AA	AA	AA	AA	AA	AA	AA	AA	AA	AA	AA
chr1_1403770_C_T	1	1403770	BOT	[T/C]	BB	BB	BB	BB	BB	BB	BB	BB	BB	BB	BB	BB	BB	BB	BB	BB	BB	BB	BB	BB	BB	BB	BB	BB	BB	BB	BB	BB	BB	BB	BB	BB	BB	BB	BB	BB	BB	BB	BB	BB	BB	BB	BB	BB	BB
chr1_14044589_A_G	1	14044589	TOP	[A/G]	BB	BB	BB	BB	BB	BB	BB	BB	BB	BB	BB	BB	BB	BB	BB	BB	BB	BB	BB	BB	BB	BB	BB	BB	BB	BB	BB	BB	BB	BB	BB	BB	BB	BB	BB	BB	BB	BB	BB	BB	BB	BB	BB	BB	BB
chr1_14059862_G_T	1	14059862	BOT	[T/G]	AA	AA	AA	AA	AA	AA	AA	AA	AA	AA	AA	AA	AA	AA	AA	AA	AA	AA	AA	AA	AA	AA	AA	AA	AA	AA	AA	AA	AA	AA	AA	AA	AA	AA	AA	AA	AA	AA	AA	AA	AA	AA	AA	AA	AA
chr1_14163808_C_T	1	14163808	TOP	[A/G]	BB	BB	BB	BB	BB	BB	BB	BB	BB	BB	BB	BB	BB	BB	BB	BB	BB	BB	BB	BB	BB	BB	BB	BB	BB	BB	BB	BB	BB	BB	BB	BB	BB	BB	BB	BB	BB	BB	BB	BB	BB	BB	BB	BB	BB
mu_o_C_T_chr1_14163969	1	14163969	BOT	[T/C]	BB	BB	BB	BB	BB	BB	BB	BB	BB	BB	BB	BB	BB	BB	BB	BB	BB	BB	BB	BB	BB	BB	BB	BB	BB	BB	BB	BB	BB	BB	BB	BB	BB	BB	BB	BB	BB	BB	BB	BB	BB	BB	BB	BB	BB
mu_o_T_C_chr1_14164870	1	14164870	BOT	[T/C]	AA	AA	AA	AA	AA	AA	AA	AA	AA	AA	AA	AA	AA	AA	AA	AA	AA	AA	AA	AA	AA	AA	AA	AA	AA	AA	AA	AA	AA	AA	AA	AA	AA	AA	AA	AA	AA	AA	AA	AA	AA	AA	AA	AA	AA
mu_s_G_A_chr1_14196830	1	14196830	BOT	[T/C]	BB	BB	BB	BB	BB	BB	BB	BB	BB	BB	BB	BB	BB	BB	BB	BB	BB	BB	BB	BB	BB	BB	BB	BB	BB	BB	BB	BB	BB	BB	BB	BB	BB	BB	BB	BB	BB	BB	BB	BB	BB	BB	BB	BB	BB
chr1_14215925_A_G	1	14215925	BOT	[T/C]	AA	AA	AA	AA	AA	AA	AA	AA	AA	AA	AA	AA	AA	AA	AA	AA	AA	AA	AA	AA	AA	AA	AA	AA	AA	AA	AA	AA	AA	AA	AA	AA	AA	AA	AA	AA	AA	AA	AA	AA	AA	AA	AA	AA	AA
chr1_14217751_G_T	1	14217751	BOT	[T/G]	BB	BB	BB	BB	BB	BB	BB	BB	BB	BB	BB	BB	BB	BB	BB	BB	BB	BB	BB	BB	BB	BB	BB	BB	BB	BB	BB	BB	BB	BB	BB	BB	BB	BB	BB	BB	BB	BB	BB	BB	BB	BB	BB	BB	BB
chr1_14232730_C_T	1	14232730	BOT	[T/C]	AA	AA	AA	AA	AA	AA	AA	AA	AA	AA	AA	AA	AA	AA	AA	AA	AA	AA	AA	AA	AA	AA	AA	AA	AA	AA	AA	AA	AA	AA	AA	AA	AA	AA	AA	AA	AA	AA	AA	AA	AA	AA	AA	AA	AA
chr1_14302982_C_T	1	14302982	BOT	[T/C]	AB	AB	AB	NC	AB	AB	BB	BB	AB	AB	BB	AB	AB	AB	AB	AB	AB	BB	BB	BB	AB	NC	AB	AB	AB	AB	NC	BB	NC	AB	AB	AB	AB	AB	AB	BB	AB	AB	AB	AB	BB	NC	AB	AB	BB
chr1_14309754_A_C	1	14309754	BOT	[T/G]	BB	BB	BB	BB	BB	BB	BB	BB	BB	BB	BB	BB	BB	BB	BB	BB	BB	BB	BB	BB	BB	BB	BB	BB	BB	BB	BB	BB	BB	BB	BB	BB	BB	BB	BB	BB	BB	BB	BB	BB	BB	BB	BB	BB	BB
lb_G_T_chr1_14453117	1	14453117	BOT	[T/G]	AB	AB	AA	AA	NC	BB	BB	AB	BB	AA	BB	AB	AB	BB	AB	AA	BB	AB	AB	BB	AB	AB	AB	AB	AA	AB	AB	AA	AB	BB	AB	AB	AB	BB	BB	AB	NC	AA	AB	AA	AB	AA	AB	AB	BB
chr1_1449213_C_T	1	1449213	BOT	[T/C]	BB	BB	AB	AA	AB	AB	AB	AB	AA	AB	BB	BB	AB	AB	BB	AA	AA	BB	BB	AB	AB	AB	BB	BB	AA	AB	AA	AB	AA	AB	BB	BB	AB	AB	BB	AB	BB	BB	AB	AB	AB	AB	BB	AB	BB
chr1_14575102_C_T	1	14575102	TOP	[A/G]	AA	AA	AA	AA	AA	AA	AA	AA	AA	AA	AA	AA	AA	AA	AA	AA	AA	AA	AA	AA	AA	AA	AA	AA	AA	AA	AA	AA	AA	AA	AA	AA	AA	AA	AA	AA	AA	AA	AA	AA	AA	AA	AA	AA	AA
chr1_14581112_A_G	1	14581112	BOT	[T/C]	AB	AB	AA	AA	AB	BB	BB	AB	BB	AA	BB	AB	AB	BB	AB	AA	BB	AB	AB	BB	AB	AB	AB	AB	AA	AB	AB	AA	AB	BB	AB	AB	AB	BB	BB	AB	BB	AA	AB	AA	AB	AA	AB	AB	BB
chr1_1458632_A_G	1	1458632	TOP	[A/G]	BB	BB	BB	BB	BB	BB	BB	BB	BB	BB	BB	BB	BB	BB	BB	BB	BB	BB	BB	BB	BB	BB	BB	BB	BB	BB	BB	BB	BB	BB	BB	BB	BB	BB	BB	BB	BB	BB	BB	BB	BB	BB	BB	BB	BB
chr1_14624429_C_T	1	14624429	BOT	[T/C]	AA	AA	AA	AA	AA	AA	AA	AA	AA	AA	AA	AA	AA	AA	AA	AA	AA	AA	AA	AA	AA	AA	AA	AA	AA	AA	AA	AA	AA	AA	AA	AA	AA	AA	AA	AA	AA	AA	AA	AA	AA	AA	AA	AA	AA
chr1_14667660_C_T	1	14667660	BOT	[T/C]	AA	AA	AA	AA	AA	AA	AA	AA	AA	AA	AA	AA	AA	AA	AA	AA	AA	AA	AA	AA	AA	AA	AA	AA	AA	AA	AA	AA	AA	AA	AA	AA	AA	AA	AA	AA	AA	AA	AA	AA	AA	AA	AA	AA	AA
chr1_14668769_C_T	1	14668769	TOP	[A/G]	AB	AB	BB	BB	AB	AA	AA	AB	AA	BB	AA	AB	AB	AA	AB	BB	AA	AB	AB	AA	AB	AB	AB	AB	BB	AB	AB	BB	AB	AA	AB	AB	AB	AA	AA	AB	AA	BB	AB	BB	AB	BB	AB	AB	AA
chr1_1482338_G_T	1	1482338	TOP	[A/C]	BB	BB	BB	BB	BB	BB	BB	BB	BB	BB	BB	BB	BB	BB	BB	BB	BB	BB	BB	BB	BB	BB	BB	BB	BB	BB	BB	BB	BB	BB	BB	BB	BB	BB	BB	BB	BB	BB	BB	BB	BB	BB	BB	BB	BB
chr1_1482634_C_T	1	1482634	TOP	[A/G]	AA	AA	AA	AA	AA	AA	AA	AA	AA	AA	AA	AA	AA	AA	AA	AA	AA	AA	AA	AA	AA	AA	AA	AA	AA	AA	AA	AA	AA	AA	AA	AA	AA	AA	AA	AA	AA	AA	AA	AA	AA	AA	AA	AA	AA
chr1_14842859_C_T	1	14842859	TOP	[A/G]	BB	BB	BB	BB	BB	BB	BB	BB	BB	BB	BB	BB	BB	BB	BB	BB	BB	BB	BB	BB	BB	BB	BB	BB	BB	BB	BB	BB	BB	BB	BB	BB	BB	BB	BB	BB	BB	BB	BB	BB	BB	BB	BB	BB	BB
chr1_14860048_A_G	1	14860048	TOP	[A/G]	AA	AA	AA	AA	AA	AA	AA	AA	AA	AA	AA	AA	AA	AA	AA	AA	AA	AA	AA	AA	AA	AA	AA	AA	AA	AA	AA	AA	AA	AA	AA	AA	AA	AA	AA	AA	AA	AA	AA	AA	AA	AA	AA	AA	AA
chr1_14954166_G_T	1	14954166	TOP	[A/C]	BB	BB	BB	BB	BB	BB	BB	BB	BB	BB	BB	BB	BB	BB	BB	BB	BB	BB	BB	BB	BB	BB	BB	BB	BB	BB	BB	BB	BB	BB	BB	BB	BB	BB	BB	BB	BB	BB	BB	BB	BB	BB	BB	BB	BB
chr1_14958139_A_G	1	14958139	TOP	[A/G]	AA	AA	AA	AA	AA	AA	AA	AA	AA	AA	AA	AA	AA	AA	AA	AA	AA	AA	AA	AA	AA	AA	AA	AA	AA	AA	AA	AA	AA	AA	AA	AA	AA	AA	AA	AA	AA	AA	AA	AA	AA	AA	AA	AA	AA
ae_T_C_chr1_14975908	1	14975908	TOP	[A/G]	AA	AA	AA	AA	AA	AA	AA	AA	AA	AA	AA	AA	AA	AA	AA	AA	AA	AA	AA	AA	AA	AA	AA	AA	AA	AA	AA	AA	AA	AA	AA	AA	AA	AA	AA	AA	AA	AA	AA	AA	AA	AA	AA	AA	AA
chr1_14983549_A_G	1	14983549	TOP	[A/G]	AA	AA	AA	AA	AA	AA	AA	AA	AA	AA	AA	AA	AA	AA	AA	AA	AA	AA	AA	AA	AA	AA	AA	AA	AA	AA	AA	AA	AA	AA	AA	AA	AA	AA	AA	AA	AA	AA	AA	AA	AA	AA	AA	AA	AA
chr1_15016961_A_G	1	15016961	BOT	[T/C]	AA	AA	AA	AA	AA	AA	AA	AA	AA	AA	AA	AA	AA	AA	AA	AA	AA	AA	AA	AA	AA	AA	AA	AA	AA	AA	AA	AA	AA	AA	AA	AA	AA	AA	AA	AA	AA	AA	AA	AA	AA	AA	AA	AA	AA
cn_A_C_chr1_15026120	1	15026120	TOP	[A/C]	AA	AA	AA	AA	AA	AA	AA	AA	AA	AA	AA	AA	AA	AA	AA	AA	AA	AA	AA	AA	AA	AA	AA	AA	AA	AA	AA	AA	AA	AA	AA	AA	AA	AA	AA	AA	AA	AA	AA	AA	AA	AA	AA	AA	AA
chr1_1513844_A_C	1	1513844	BOT	[T/G]	BB	BB	BB	BB	BB	BB	BB	BB	BB	BB	BB	BB	BB	BB	BB	BB	BB	BB	BB	BB	BB	BB	BB	BB	BB	BB	BB	BB	BB	BB	BB	BB	BB	BB	BB	BB	BB	BB	BB	BB	BB	BB	BB	BB	BB
mu_s_A_G_chr1_15463723	1	15463723	TOP	[A/G]	AA	AA	AA	AA	AA	AA	AA	AA	AA	AA	AA	AA	AA	AA	AA	AA	AA	AA	AA	AA	AA	AA	AA	AA	AA	AA	AA	AA	AA	AA	AA	AA	AA	AA	AA	AA	AA	AA	AA	AA	AA	AA	AA	AA	AA
ae_A_G_chr1_15463774	1	15463774	BOT	[T/C]	AA	AA	AA	AA	AA	AA	AA	AA	AA	AA	AA	AA	AA	AA	AA	AA	AA	AA	AA	AA	AA	AA	AA	AA	AA	AA	AA	AA	AA	AA	AA	AA	AA	AA	AA	AA	AA	AA	AA	AA	AA	AA	AA	AA	AA
cn_C_T_chr1_15547251	1	15547251	BOT	[T/C]	BB	BB	BB	BB	BB	BB	BB	BB	BB	BB	BB	BB	BB	BB	BB	BB	BB	BB	BB	BB	BB	BB	BB	BB	BB	BB	BB	BB	BB	BB	BB	BB	BB	BB	BB	BB	BB	BB	BB	BB	BB	BB	BB	BB	BB
chr1_15601334_A_G	1	15601334	BOT	[T/C]	AA	AA	AA	AA	AA	AA	AA	AA	AA	AA	AA	AA	AA	AA	AA	AA	AA	AA	AA	AA	AA	AA	AA	AA	AA	AA	AA	AA	AA	AA	AA	AA	AA	AA	AA	AA	AA	AA	AA	AA	AA	AA	AA	AA	AA
chr1_15605027_A_G	1	15605027	BOT	[T/C]	BB	BB	BB	BB	BB	BB	BB	BB	BB	BB	BB	BB	BB	BB	BB	BB	BB	BB	BB	BB	BB	BB	BB	BB	BB	BB	BB	BB	BB	BB	BB	BB	BB	BB	BB	BB	BB	BB	BB	BB	BB	BB	BB	BB	BB
chr1_1562688_A_C	1	1562688	TOP	[A/C]	BB	BB	BB	BB	BB	BB	BB	BB	BB	BB	BB	BB	BB	BB	BB	BB	BB	BB	BB	BB	BB	BB	BB	BB	BB	BB	BB	BB	BB	BB	BB	BB	BB	BB	BB	BB	BB	BB	BB	BB	BB	BB	BB	BB	BB
SNP229_112	1	1563978	BOT	[T/G]	AA	AA	AB	BB	AB	AB	AB	AB	BB	AB	AA	AA	AB	AB	AA	BB	BB	AA	AA	AB	AB	AB	AA	AA	BB	AB	BB	AB	BB	AB	AA	NC	AB	AB	AA	AB	AA	AA	AB	BB	AB	AB	AA	AB	AA
chr1_15657631_G_T	1	15657631	BOT	[T/G]	BB	BB	BB	BB	BB	BB	BB	BB	BB	BB	BB	BB	BB	BB	BB	BB	BB	BB	BB	BB	BB	BB	BB	BB	BB	BB	BB	BB	BB	BB	BB	BB	BB	BB	BB	BB	BB	BB	BB	BB	BB	BB	BB	BB	BB
chr1_15659319_C_T	1	15659319	TOP	[A/G]	AA	AA	AA	AA	AA	AA	AA	AA	AA	AA	AA	AA	AA	AA	AA	AA	AA	AA	AA	AA	AA	AA	AA	AA	AA	AA	AA	AA	AA	AA	AA	AA	AA	AA	AA	AA	AA	AA	AA	AA	AA	AA	AA	AA	AA
chr1_15702664_A_G	1	15702664	BOT	[T/C]	BB	BB	BB	BB	BB	BB	BB	BB	BB	BB	BB	BB	BB	BB	BB	BB	BB	BB	BB	BB	BB	BB	BB	BB	BB	BB	BB	BB	BB	BB	BB	NC	BB	BB	BB	BB	BB	BB	BB	BB	BB	BB	BB	BB	BB
chr1_15717010_A_C	1	15717010	TOP	[A/C]	AA	AA	AA	AA	AA	AA	AA	AA	AA	AA	AA	AA	AA	AA	AA	AA	AA	AA	AA	AA	AA	AA	AA	AA	AA	AA	AA	AA	AA	AA	AA	AA	AA	AA	AA	AA	AA	AA	AA	AA	AA	AA	AA	AA	AA
chr1_15717071_C_T	1	15717071	TOP	[A/G]	BB	BB	BB	BB	BB	BB	BB	BB	BB	BB	BB	BB	BB	BB	BB	BB	BB	BB	BB	BB	BB	BB	BB	BB	BB	BB	BB	BB	BB	BB	BB	BB	BB	BB	BB	BB	BB	BB	BB	BB	BB	BB	BB	BB	BB
chr1_15804771_A_G	1	15804771	BOT	[T/C]	BB	BB	BB	BB	BB	BB	BB	BB	BB	BB	BB	BB	BB	BB	BB	BB	BB	BB	BB	BB	BB	BB	BB	BB	BB	BB	BB	BB	BB	BB	BB	BB	BB	BB	BB	BB	BB	BB	BB	BB	BB	BB	BB	BB	BB
chr1_1583561_A_G	1	1583561	TOP	[A/G]	AA	AA	AA	AA	AA	AA	AA	AA	AA	AA	AA	AA	AA	AA	AA	AA	AA	AA	AA	AA	AA	AA	AA	AA	AA	AA	AA	AA	AA	AA	AA	AA	AA	AA	AA	AA	AA	AA	AA	AA	AA	AA	AA	AA	AA
chr1_15843271_A_G	1	15843271	TOP	[A/G]	AA	AA	AA	AA	AA	AA	AA	AA	AA	AA	AA	AA	AA	AA	AA	AA	AA	AA	AA	AA	AA	AA	AA	AA	AA	AA	AA	AA	AA	AA	AA	AA	AA	AA	AA	AA	AA	AA	AA	AA	AA	AA	AA	AA	AA
SNP683_120	1	1587657	BOT	[T/C]	BB	BB	BB	BB	BB	BB	BB	BB	BB	BB	BB	BB	BB	BB	BB	BB	BB	BB	BB	BB	BB	BB	BB	BB	BB	BB	BB	BB	BB	BB	BB	BB	BB	BB	BB	BB	BB	BB	BB	BB	BB	BB	BB	BB	BB
chr1_15882089_C_T	1	15882089	BOT	[T/C]	AA	AA	AA	AA	AA	AA	AA	AA	AA	AA	AA	AA	AA	AA	AA	AA	AA	AA	AA	AA	AA	AA	AA	AA	AA	AA	AA	AA	AA	AA	AA	AA	AA	AA	AA	AA	AA	AA	AA	AA	AA	AA	AA	AA	AA
chr1_15889332_A_G	1	15889332	TOP	[A/G]	BB	BB	BB	BB	BB	BB	BB	BB	BB	BB	BB	BB	BB	BB	BB	BB	BB	BB	BB	BB	BB	BB	BB	BB	BB	BB	BB	BB	BB	BB	BB	NC	BB	BB	BB	BB	BB	BB	BB	BB	BB	BB	BB	BB	BB
cn_G_T_chr1_15890810	1	15890810	BOT	[T/G]	BB	BB	BB	BB	BB	BB	BB	BB	BB	BB	BB	BB	BB	BB	BB	BB	BB	BB	BB	BB	BB	BB	BB	BB	BB	BB	BB	BB	BB	BB	BB	BB	BB	BB	BB	BB	BB	BB	BB	BB	BB	BB	BB	BB	BB
SNP1375_272	1	15892180	BOT	[T/C]	AB	AB	AA	AA	AB	BB	BB	AB	BB	AA	BB	AB	AB	BB	AB	AA	BB	AB	AB	BB	AB	AB	AB	AB	AA	AB	AB	AA	AB	BB	AB	AB	AB	BB	BB	AB	BB	AA	AB	AA	BB	AA	AB	AB	BB
be_G_T_chr1_15907392	1	15907392	BOT	[T/G]	BB	BB	BB	BB	BB	BB	BB	BB	BB	BB	BB	BB	BB	BB	BB	BB	BB	BB	BB	BB	BB	BB	BB	BB	BB	BB	BB	BB	BB	BB	BB	BB	BB	BB	BB	BB	BB	BB	BB	BB	BB	BB	BB	BB	BB
chr1_15909374_C_T	1	15909374	BOT	[T/C]	AB	AB	BB	BB	AB	AA	AA	AB	AA	BB	AA	AB	AB	AA	AB	BB	AA	AB	AB	AA	AB	AB	AB	AB	BB	AB	AB	BB	AB	AA	AB	AB	AB	AA	AA	AB	AA	BB	AB	BB	AA	BB	AB	AB	AA
chr1_15927368_A_G	1	15927368	TOP	[A/G]	BB	BB	BB	BB	BB	BB	BB	BB	BB	BB	BB	BB	BB	BB	BB	BB	BB	BB	BB	BB	BB	BB	BB	BB	BB	BB	BB	BB	BB	BB	BB	BB	BB	BB	BB	BB	BB	BB	BB	BB	BB	BB	BB	BB	BB
lb_T_C_chr1_15928681	1	15928681	BOT	[T/C]	AA	AA	AA	AA	AA	AA	AA	AA	AA	AA	AA	AA	AA	AA	AA	AA	AA	AA	AA	AA	AA	AA	AA	AA	AA	AA	AA	AA	AA	AA	AA	AA	AA	AA	AA	AA	AA	AA	AA	AA	AA	AA	AA	AA	AA
chr1_15934554_C_T	1	15934554	TOP	[A/G]	AB	AB	BB	BB	NC	AA	AA	AB	AA	BB	AA	AB	AB	AA	AB	BB	AA	AB	AB	AA	AB	AB	AB	AB	BB	AB	AB	BB	AB	AA	AB	AB	AB	AA	AA	AB	AA	BB	AB	BB	AA	BB	AB	AB	AA
ae_T_C_chr1_15943292	1	15943292	BOT	[T/C]	AA	AA	AA	AA	AA	AA	AA	AA	AA	AA	AA	AA	AA	AA	AA	AA	AA	AA	AA	AA	AA	AA	AA	AA	AA	AA	AA	AA	AA	AA	AA	AA	AA	AA	AA	AA	AA	AA	AA	AA	AA	AA	AA	AA	AA
chr1_159994_G_T	1	159994	BOT	[T/G]	AA	AA	AA	AA	AA	AA	AA	AA	AA	AA	AA	AA	AA	AA	AA	AA	AA	AA	AA	AA	AA	AA	AA	AA	AA	AA	AA	AA	AA	AA	AA	AA	AA	AA	AA	AA	AA	AA	AA	AA	AA	AA	AA	AA	AA
li_G_A_chr1_16000145	1	16000145	TOP	[A/G]	BB	BB	BB	BB	BB	BB	BB	BB	BB	BB	BB	BB	BB	BB	BB	BB	BB	BB	BB	BB	BB	BB	BB	BB	BB	BB	BB	BB	BB	BB	BB	BB	BB	BB	BB	BB	BB	BB	BB	BB	BB	BB	BB	BB	BB
chr1_1611098_A_C	1	1611098	TOP	[A/C]	BB	BB	AB	AA	AB	AB	AB	AB	AA	AB	BB	BB	AB	AB	BB	AA	AA	BB	BB	AB	AB	AB	BB	BB	AA	AB	AA	AB	AA	AB	BB	NC	AB	AB	BB	AB	BB	BB	AB	AA	AB	AB	BB	AB	BB
chr1_16159075_C_T	1	16159075	BOT	[T/C]	AB	AB	AA	AA	AB	AB	AB	AB	AB	AA	AB	AB	AB	AB	AB	AA	AB	AB	AB	AB	AB	AB	AB	AB	AA	AB	AB	AA	AB	AB	AB	AB	AB	AB	AB	AB	AB	AA	AB	AA	AB	AA	AB	AB	AB
chr1_16197622_A_G	1	16197622	TOP	[A/G]	BB	BB	BB	BB	BB	BB	BB	BB	BB	BB	BB	BB	BB	BB	BB	BB	BB	BB	BB	BB	BB	BB	BB	BB	BB	BB	BB	BB	BB	BB	BB	BB	BB	BB	BB	BB	BB	BB	BB	BB	BB	BB	BB	BB	BB
chr1_16205431_A_C	1	16205431	TOP	[A/C]	AB	AB	AA	AA	AB	BB	BB	AB	BB	AA	BB	AB	AB	BB	AB	AA	BB	AB	AB	BB	AB	AB	AB	AB	AA	AB	AB	AA	AB	BB	AB	AB	AB	BB	BB	AB	BB	AA	AB	AA	BB	AA	AB	AB	BB
chr1_1620902_C_T	1	1620902	BOT	[T/C]	BB	BB	AB	AA	AB	AB	AB	AB	AA	AB	BB	BB	AB	AB	BB	AA	AA	BB	BB	AB	AB	AB	BB	BB	AA	AB	AA	AB	AA	AB	BB	BB	AB	AB	BB	AB	BB	BB	AB	AA	AB	AB	BB	AB	BB
chr1_16242814_C_T	1	16242814	BOT	[T/C]	AA	AA	AA	AA	AA	AA	AA	AA	AA	AA	AA	AA	AA	AA	AA	AA	AA	AA	AA	AA	AA	AA	AA	AA	AA	AA	AA	AA	AA	AA	AA	AA	AA	AA	AA	AA	AA	AA	AA	AA	AA	AA	AA	AA	AA
chr1_16384739_A_G	1	16384739	BOT	[T/C]	AA	AA	AA	AA	AA	AA	AA	AA	AA	AA	AA	AA	AA	AA	AA	AA	AA	AA	AA	AA	AA	AA	AA	AA	AA	AA	AA	AA	AA	AA	AA	NC	AA	AA	AA	AA	AA	AA	AA	AA	AA	AA	AA	AA	AA
lb_G_A_chr1_16391144	1	16391144	TOP	[A/G]	AB	AB	AA	AA	AB	BB	BB	AB	BB	AA	BB	AB	AB	BB	AB	AA	BB	AB	AB	BB	AB	AB	AB	AB	AA	AB	AB	AA	AB	BB	AB	AB	AB	BB	BB	AB	BB	AA	AB	AA	BB	AA	AB	AB	BB
chr1_16444162_C_T	1	16444162	BOT	[T/C]	BB	BB	BB	BB	BB	BB	BB	BB	BB	BB	BB	BB	BB	BB	BB	BB	BB	BB	BB	BB	BB	BB	BB	BB	BB	BB	BB	BB	BB	BB	BB	BB	BB	BB	BB	BB	BB	BB	BB	BB	BB	BB	BB	BB	BB
chr1_16479147_A_G	1	16479147	BOT	[T/C]	AA	AA	AA	AA	AA	AA	AA	AA	AA	AA	AA	AA	AA	AA	AA	AA	AA	AA	AA	AA	AA	AA	AA	AA	AA	AA	AA	AA	AA	AA	AA	AA	AA	AA	AA	AA	AA	AA	AA	AA	AA	AA	AA	AA	AA
chr1_16513552_C_T	1	16513552	BOT	[T/C]	AB	AB	BB	BB	AB	AA	AA	AB	AA	BB	AA	AB	AB	AA	AB	BB	AA	AB	AB	AA	AB	AB	AB	AB	BB	AB	AB	BB	AB	AA	AB	AB	AB	AA	AA	AB	AA	BB	AB	BB	AA	BB	AB	AB	AA
chr1_16550466_A_G	1	16550466	BOT	[T/C]	AA	AA	AA	AA	AA	AA	AA	AA	AA	AA	AA	AA	AA	AA	AA	AA	AA	AA	AA	AA	AA	AA	AA	AA	AA	AA	AA	AA	AA	AA	AA	AA	AA	AA	AA	AA	AA	AA	AA	AA	AA	AA	AA	AA	AA
chr1_1655940_C_T	1	1655940	BOT	[T/C]	BB	BB	BB	BB	BB	BB	BB	BB	BB	BB	BB	BB	BB	BB	BB	BB	BB	BB	BB	BB	BB	BB	BB	BB	BB	BB	BB	BB	BB	BB	BB	BB	BB	BB	BB	BB	BB	BB	BB	BB	BB	BB	BB	BB	BB
chr1_16586426_A_C	1	16586426	TOP	[A/C]	BB	BB	BB	BB	BB	BB	BB	BB	BB	BB	BB	BB	BB	BB	BB	BB	BB	BB	BB	BB	BB	BB	BB	BB	BB	BB	BB	BB	BB	BB	BB	NC	BB	BB	BB	BB	BB	BB	BB	BB	BB	BB	BB	BB	BB
chr1_16623814_C_T	1	16623814	BOT	[T/C]	AB	AB	BB	BB	AB	AA	AA	AB	AA	BB	AA	AB	AB	AA	AB	AB	AA	AB	AB	AA	AB	AB	AB	AB	BB	AB	AB	BB	AB	AA	AB	AB	AB	AA	AA	AB	AA	BB	AB	BB	AA	BB	AB	AB	AA
chr1_16694690_G_T	1	16694690	TOP	[A/C]	BB	BB	BB	BB	BB	BB	BB	BB	BB	BB	BB	BB	BB	BB	BB	BB	BB	BB	BB	BB	BB	BB	BB	BB	BB	BB	BB	BB	BB	BB	BB	BB	BB	BB	BB	BB	BB	BB	BB	BB	BB	BB	BB	BB	BB
cn_G_A_chr1_16861410	1	16861410	TOP	[A/G]	BB	BB	BB	BB	BB	BB	BB	BB	BB	BB	BB	BB	BB	BB	BB	BB	BB	BB	BB	BB	BB	BB	BB	BB	BB	BB	BB	BB	BB	BB	BB	BB	BB	BB	BB	BB	BB	BB	BB	BB	BB	BB	BB	BB	BB
chr1_16866207_A_G	1	16866207	TOP	[A/G]	AB	AB	BB	BB	AB	AA	AA	AB	AA	BB	AA	AB	AB	AA	AB	AB	AA	AB	AB	AA	AB	AB	AB	AB	BB	AB	AB	BB	AB	AA	AB	AB	AB	AA	AA	AB	AA	BB	AB	AB	AA	BB	AB	AB	AA
lb_A_G_chr1_16898215	1	16898215	TOP	[A/G]	AA	AA	AA	AA	AA	AA	AA	AA	AA	AA	AA	AA	AA	AA	AA	AA	AA	AA	AA	AA	AA	AA	AA	AA	AA	AA	AA	AA	AA	AA	AA	AA	AA	AA	AA	AA	AA	AA	AA	AA	AA	AA	AA	AA	AA
ae_G_A_chr1_16901068	1	16901068	TOP	[A/G]	BB	BB	BB	BB	BB	BB	BB	BB	BB	BB	BB	BB	BB	BB	BB	BB	BB	BB	BB	BB	BB	BB	BB	BB	BB	BB	BB	BB	BB	BB	BB	BB	BB	BB	BB	BB	BB	BB	BB	BB	BB	BB	BB	BB	BB
be_T_C_chr1_16901696	1	16901696	BOT	[T/C]	AA	AA	AA	AA	AA	AA	AA	AA	AA	AA	AA	AA	AA	AA	AA	AA	AA	AA	AA	AA	AA	AA	AA	AA	AA	AA	AA	AA	AA	AA	AA	AA	AA	AA	AA	AA	AA	AA	AA	AA	AA	AA	AA	AA	AA
chr1_16904389_C_T	1	16904389	BOT	[T/C]	BB	BB	BB	BB	BB	BB	BB	BB	BB	BB	BB	BB	BB	BB	BB	BB	BB	BB	BB	BB	BB	BB	BB	BB	BB	BB	BB	BB	BB	BB	BB	BB	BB	BB	BB	BB	BB	BB	BB	BB	BB	BB	BB	BB	BB
chr1_16906729_A_C	1	16906729	TOP	[A/C]	AB	AB	BB	BB	AB	AA	AA	AB	AA	BB	AA	AB	AB	AA	AB	AB	AA	AB	AB	AA	AB	AB	AB	AB	BB	AB	AB	BB	AB	AA	AB	AB	AB	AA	AA	AB	AA	BB	AB	AB	AA	BB	AB	AB	AA
cn_C_T_chr1_1693732	1	1693732	BOT	[T/C]	BB	BB	BB	BB	BB	BB	BB	BB	BB	BB	BB	BB	BB	BB	BB	BB	BB	BB	BB	BB	BB	BB	BB	BB	BB	BB	BB	BB	BB	BB	BB	BB	BB	BB	BB	BB	BB	BB	BB	BB	BB	BB	BB	BB	BB
chr1_1695157_A_G	1	1695157	BOT	[T/C]	AA	AA	AB	BB	AB	AB	AB	AB	BB	AB	AA	AA	AB	AB	AA	BB	BB	AA	AA	AB	AB	AB	AA	AA	BB	AB	BB	AB	BB	AB	AA	NC	AB	AB	AA	AB	AA	AA	AB	BB	AB	AB	AA	AB	AA
chr1_16967062_A_G	1	16967062	TOP	[A/G]	AA	AA	AA	AA	AA	AA	AA	AA	AA	AA	AA	AA	AA	AA	AA	AA	AA	AA	AA	AA	AA	AA	AA	AA	AA	AA	AA	AA	AA	AA	AA	AA	AA	AA	AA	AA	AA	AA	AA	AA	AA	AA	AA	AA	AA
chr1_16977489_A_G	1	16977489	TOP	[A/G]	AA	AA	AA	AA	AA	AA	AA	AA	AA	AA	AA	AA	AA	AA	AA	AA	AA	AA	AA	AA	AA	AA	AA	AA	AA	AA	AA	AA	AA	AA	AA	NC	AA	AA	AA	AA	AA	AA	AA	AA	AA	AA	AA	AA	AA
chr1_17025792_C_T	1	17025792	BOT	[T/C]	BB	BB	BB	BB	BB	BB	BB	BB	BB	BB	BB	BB	BB	BB	BB	BB	BB	BB	BB	BB	BB	BB	BB	BB	BB	BB	BB	BB	BB	BB	BB	BB	BB	BB	BB	BB	BB	BB	BB	BB	BB	BB	BB	BB	BB
chr1_17048242_A_G	1	17048242	TOP	[A/G]	AA	AA	AA	AA	AA	AA	AA	AA	AA	AA	AA	AA	AA	AA	AA	AA	AA	AA	AA	AA	AA	AA	AA	AA	AA	AA	AA	AA	AA	AA	AA	AA	AA	AA	AA	AA	AA	AA	AA	AA	AA	AA	AA	AA	AA
be_C_T_chr1_1705248	1	1705248	BOT	[T/C]	BB	BB	BB	BB	BB	BB	BB	BB	BB	BB	BB	BB	BB	BB	BB	BB	BB	BB	BB	BB	BB	BB	BB	BB	BB	BB	BB	BB	BB	BB	BB	BB	BB	BB	BB	BB	BB	BB	BB	BB	BB	BB	BB	BB	BB
chr1_17139876_A_G	1	17139876	TOP	[A/G]	AB	AB	AA	AA	NC	BB	BB	AB	BB	AA	BB	AB	AB	BB	AB	AB	BB	AB	AB	BB	AB	AB	AB	AB	AA	AB	AB	AA	AB	BB	AB	AB	AB	BB	BB	AB	BB	AA	AB	AB	BB	AA	AB	AB	BB
chr1_17202271_A_G	1	17202271	TOP	[A/G]	BB	BB	BB	BB	BB	BB	BB	BB	BB	BB	BB	BB	BB	BB	BB	BB	BB	BB	BB	BB	BB	BB	BB	BB	BB	BB	BB	BB	BB	BB	BB	BB	BB	BB	BB	BB	BB	BB	BB	BB	BB	BB	BB	BB	BB
chr1_17217214_A_G	1	17217214	TOP	[A/G]	BB	BB	BB	BB	BB	BB	BB	BB	BB	BB	BB	BB	BB	BB	BB	BB	BB	BB	BB	BB	BB	BB	BB	BB	BB	BB	BB	BB	BB	BB	BB	NC	BB	BB	BB	BB	BB	BB	BB	BB	BB	BB	BB	BB	BB
chr1_17218476_A_G	1	17218476	TOP	[A/G]	BB	BB	BB	BB	BB	BB	BB	BB	BB	BB	BB	BB	BB	BB	BB	BB	BB	BB	BB	BB	BB	BB	BB	BB	BB	BB	BB	BB	BB	BB	BB	BB	BB	BB	BB	BB	BB	BB	BB	BB	BB	BB	BB	BB	BB
chr1_17218655_A_G	1	17218655	BOT	[T/C]	AA	AA	AA	AA	AA	AA	AA	AA	AA	AA	AA	AA	AA	AA	AA	AA	AA	AA	AA	AA	AA	AA	AA	AA	AA	AA	AA	AA	AA	AA	AA	AA	AA	AA	AA	AA	AA	AA	AA	AA	AA	AA	AA	AA	AA
lb_A_C_chr1_1729237	1	1729237	TOP	[A/C]	AA	AA	AA	AA	AA	AA	AA	AA	AA	AA	AA	AA	AA	AA	AA	AA	AA	AA	AA	AA	AA	AA	AA	AA	AA	AA	AA	AA	AA	AA	AA	AA	AA	AA	AA	AA	AA	AA	AA	AA	AA	AA	AA	AA	AA
chr1_17324608_G_T	1	17324608	BOT	[T/G]	AA	AA	AA	AA	AA	AA	AA	AA	AA	AA	AA	AA	AA	AA	AA	AA	AA	AA	AA	AA	AA	AA	AA	AA	AA	AA	AA	AA	AA	AA	AA	AA	AA	AA	AA	AA	AA	AA	AA	AA	AA	AA	AA	AA	AA
lb_T_C_chr1_17397267	1	17397267	BOT	[T/C]	AA	AA	AA	AA	AA	AA	AA	AA	AA	AA	AA	AA	AA	AA	AA	AA	AA	AA	AA	AA	AA	AA	AA	AA	AA	AA	AA	AA	AA	AA	AA	AA	AA	AA	AA	AA	AA	AA	AA	AA	AA	AA	AA	AA	AA
be_A_G_chr1_17398456	1	17398456	BOT	[T/C]	AA	AA	AA	AA	AA	AA	AA	AA	AA	AA	AA	AA	AA	AA	AA	AA	AA	AA	AA	AA	AA	AA	AA	AA	AA	AA	AA	AA	AA	AA	AA	AA	AA	AA	AA	AA	AA	AA	AA	AA	AA	AA	AA	AA	AA
chr1_17402591_C_T	1	17402591	BOT	[T/C]	AB	AB	AA	AA	AB	BB	BB	AB	BB	AA	BB	AB	AB	BB	AB	AB	BB	AB	AB	BB	AB	AB	AB	AB	AA	AB	AB	AA	AB	BB	AB	AB	AB	BB	BB	AB	BB	AA	AB	AB	BB	AA	AB	AB	BB
chr1_17451211_A_G	1	17451211	TOP	[A/G]	AB	AB	BB	BB	AB	AA	AA	AB	AA	BB	AA	AB	AB	AA	AB	AB	AA	AB	AB	AA	AB	AB	AB	AB	BB	AB	AB	BB	AB	AA	AB	AB	AB	AA	AA	AB	AA	BB	AB	AB	AA	BB	AB	AB	AA
chr1_17472553_A_G	1	17472553	BOT	[T/C]	BB	BB	BB	BB	BB	BB	BB	BB	BB	BB	BB	BB	BB	BB	BB	BB	BB	BB	BB	BB	BB	BB	BB	BB	BB	BB	BB	BB	BB	BB	BB	BB	BB	BB	BB	BB	BB	BB	BB	BB	BB	BB	BB	BB	BB
chr1_17513172_A_G	1	17513172	BOT	[T/C]	AA	AA	AA	AA	AA	AA	AA	AA	AA	AA	AA	AA	AA	AA	AA	AA	AA	AA	AA	AA	AA	AA	AA	AA	AA	AA	AA	AA	AA	AA	AA	AA	AA	AA	AA	AA	AA	AA	AA	AA	AA	AA	AA	AA	AA
chr1_17549134_A_G	1	17549134	TOP	[A/G]	AA	AA	AA	AA	AA	AA	AA	AA	AA	AA	AA	AA	AA	AA	AA	AA	AA	AA	AA	AA	AA	AA	AA	AA	AA	AA	AA	AA	AA	AA	AA	AA	AA	AA	AA	AA	AA	AA	AA	AA	AA	AA	AA	AA	AA
chr1_17556282_A_G	1	17556282	BOT	[T/C]	BB	BB	BB	BB	BB	BB	BB	BB	BB	BB	BB	BB	BB	BB	BB	BB	BB	BB	BB	BB	BB	BB	BB	BB	BB	BB	BB	BB	BB	BB	BB	BB	BB	BB	BB	BB	BB	BB	BB	BB	BB	BB	BB	BB	BB
chr1_17557827_C_T	1	17557827	TOP	[A/G]	BB	BB	BB	BB	BB	BB	BB	BB	BB	BB	BB	BB	BB	BB	BB	BB	BB	BB	BB	BB	BB	BB	BB	BB	BB	BB	BB	BB	BB	BB	BB	BB	BB	BB	BB	BB	BB	BB	BB	BB	BB	BB	BB	BB	BB
chr1_1764767_A_G	1	1764767	TOP	[A/G]	AA	AA	AA	AA	AA	AA	AA	AA	AA	AA	AA	AA	AA	AA	AA	AA	AA	AA	AA	AA	AA	AA	AA	AA	AA	AA	AA	AA	AA	AA	AA	AA	AA	AA	AA	AA	AA	AA	AA	AA	AA	AA	AA	AA	AA
lb_A_G_chr1_17880537	1	17880537	BOT	[T/C]	AA	AA	AA	AA	AA	AA	AA	AA	AA	AA	AA	AA	AA	AA	AA	AA	AA	AA	AA	AA	AA	AA	AA	AA	AA	AA	AA	AA	AA	AA	AA	AA	AA	AA	AA	AA	AA	AA	AA	AA	AA	AA	AA	AA	AA
chr1_17880631_A_G	1	17880631	TOP	[A/G]	AA	AA	AA	AA	AA	AA	AA	AA	AA	AA	AA	AA	AA	AA	AA	AA	AA	AA	AA	AA	AA	AA	AA	AA	AA	AA	AA	AA	AA	AA	AA	AA	AA	AA	AA	AA	AA	AA	AA	AA	AA	AA	AA	AA	AA
chr1_17880961_A_G	1	17880961	TOP	[A/G]	AA	AA	AA	AA	AA	AA	AA	AA	AA	AA	AA	AA	AA	AA	AA	AA	AA	AA	AA	AA	AA	AA	AA	AA	AA	AA	AA	AA	AA	AA	AA	AA	AA	AA	AA	AA	AA	AA	AA	AA	AA	AA	AA	AA	AA
chr1_17908184_C_T	1	17908184	BOT	[T/C]	BB	BB	BB	BB	BB	BB	BB	BB	BB	BB	BB	BB	BB	BB	BB	BB	BB	BB	BB	BB	BB	BB	BB	BB	BB	BB	BB	BB	BB	BB	BB	BB	BB	BB	BB	BB	BB	BB	BB	BB	BB	BB	BB	BB	BB
chr1_17917599_A_G	1	17917599	TOP	[A/G]	BB	BB	BB	BB	BB	BB	BB	BB	BB	BB	BB	BB	BB	BB	BB	BB	BB	BB	BB	BB	BB	BB	BB	BB	BB	BB	BB	BB	BB	BB	BB	BB	BB	BB	BB	BB	BB	BB	BB	BB	BB	BB	BB	BB	BB
chr1_17951118_A_C	1	17951118	TOP	[A/C]	AA	AA	AA	AA	AA	AA	AA	AA	AA	AA	AA	AA	AA	AA	AA	AA	AA	AA	AA	AA	AA	AA	AA	AA	AA	AA	AA	AA	AA	AA	AA	AA	AA	AA	AA	AA	AA	AA	AA	AA	AA	AA	AA	AA	AA
chr1_17969189_C_T	1	17969189	TOP	[A/G]	BB	BB	BB	BB	BB	BB	BB	BB	BB	BB	BB	BB	BB	BB	BB	BB	BB	BB	BB	BB	BB	BB	BB	BB	BB	BB	BB	BB	BB	BB	BB	BB	BB	BB	BB	BB	BB	BB	BB	BB	BB	BB	BB	BB	BB
chr1_18013177_C_T	1	18013177	TOP	[A/G]	AA	AA	AA	AA	AA	AA	AA	AA	AA	AA	AA	AA	AA	AA	AA	AA	AA	AA	AA	AA	AA	AA	AA	AA	AA	AA	AA	AA	AA	AA	AA	AA	AA	AA	AA	AA	AA	AA	AA	AA	AA	AA	AA	AA	AA
chr1_18021871_A_G	1	18021871	TOP	[A/G]	BB	BB	BB	BB	BB	BB	BB	BB	BB	BB	BB	BB	BB	BB	BB	BB	BB	BB	BB	BB	BB	BB	BB	BB	BB	BB	BB	BB	BB	BB	BB	NC	BB	BB	BB	BB	BB	BB	BB	BB	BB	BB	BB	BB	BB
chr1_18047795_A_G	1	18047795	TOP	[A/G]	AA	AA	AA	AA	AA	AA	AA	AA	AA	AA	AA	AA	AA	AA	AA	AA	AA	AA	AA	AA	AA	AA	AA	AA	AA	AA	AA	AA	AA	AA	AA	AA	AA	AA	AA	AA	AA	AA	AA	AA	AA	AA	AA	AA	AA
chr1_18083420_G_T	1	18083420	TOP	[A/C]	AA	AA	AA	AA	AA	AA	AA	AA	AA	AA	AA	AA	AA	AA	AA	AA	AA	AA	AA	AA	AA	AA	AA	AA	AA	AA	AA	AA	AA	AA	AA	AA	AA	AA	AA	AA	AA	AA	AA	AA	AA	AA	AA	AA	AA
chr1_18105883_C_T	1	18105883	TOP	[A/G]	BB	BB	BB	BB	BB	BB	BB	BB	BB	BB	BB	BB	BB	BB	BB	BB	BB	BB	BB	BB	BB	BB	BB	BB	BB	BB	BB	BB	BB	BB	BB	BB	BB	BB	BB	BB	BB	BB	BB	BB	BB	BB	BB	BB	BB
chr1_1813511_A_G	1	1813511	BOT	[T/C]	AA	AA	AA	AA	AA	AA	AA	AA	AA	AA	AA	AA	AA	AA	AA	AA	AA	AA	AA	AA	AA	AA	AA	AA	AA	AA	AA	AA	AA	AA	AA	AA	AA	AA	AA	AA	AA	AA	AA	AA	AA	AA	AA	AA	AA
chr1_18157904_A_G	1	18157904	BOT	[T/C]	BB	BB	BB	BB	BB	BB	BB	BB	BB	BB	BB	BB	BB	BB	BB	BB	BB	BB	BB	BB	BB	BB	BB	BB	BB	BB	BB	BB	BB	BB	BB	NC	BB	BB	BB	BB	BB	BB	BB	BB	BB	BB	BB	BB	BB
chr1_18181446_C_T	1	18181446	BOT	[T/C]	AA	AA	AA	AA	AA	AA	AA	AA	AA	AA	AA	AA	AA	AA	AA	AA	AA	AA	AA	AA	AA	AA	AA	AA	AA	AA	AA	AA	AA	AA	AA	NC	AA	AA	AA	AA	AA	AA	AA	AA	AA	AA	AA	AA	AA
chr1_18207009_C_T	1	18207009	TOP	[A/G]	AA	AA	AA	AA	AA	AA	AA	AA	AA	AA	AA	AA	AA	AA	AA	AA	AA	AA	AA	AA	AA	AA	AA	AA	AA	AA	AA	AA	AA	AA	AA	AA	AA	AA	AA	AA	AA	AA	AA	AA	AA	AA	AA	AA	AA
chr1_18321760_C_T	1	18321760	TOP	[A/G]	BB	BB	BB	BB	BB	BB	BB	BB	BB	BB	BB	BB	BB	BB	BB	BB	BB	BB	BB	BB	BB	BB	BB	BB	BB	BB	BB	BB	BB	BB	BB	BB	BB	BB	BB	BB	BB	BB	BB	BB	BB	BB	BB	BB	BB
chr1_18353212_A_G	1	18353212	BOT	[T/C]	BB	BB	BB	BB	BB	BB	BB	BB	BB	BB	BB	BB	BB	BB	BB	BB	BB	BB	BB	BB	BB	BB	BB	BB	BB	BB	BB	BB	BB	BB	BB	BB	BB	BB	BB	BB	BB	BB	BB	BB	BB	BB	BB	BB	BB
chr1_1836149_A_G	1	1836149	TOP	[A/G]	BB	BB	AB	AA	AB	AB	AB	AB	AA	AB	BB	BB	AB	AB	BB	AA	AA	BB	BB	AB	AB	AB	BB	BB	AA	AB	AA	AB	AA	AB	BB	NC	AB	AB	BB	AB	BB	BB	AB	AA	AB	AB	BB	AB	BB
cn_G_A_chr1_18363246	1	18363246	TOP	[A/G]	BB	BB	BB	BB	BB	BB	BB	BB	BB	BB	BB	BB	BB	BB	BB	BB	BB	BB	BB	BB	BB	BB	BB	BB	BB	BB	BB	BB	BB	BB	BB	BB	BB	BB	BB	BB	BB	BB	BB	BB	BB	BB	BB	BB	BB
chr1_18368208_C_T	1	18368208	BOT	[T/C]	AA	AA	AA	AA	AA	AA	AA	AA	AA	AA	AA	AA	AA	AA	AA	AA	AA	AA	AA	AA	AA	AA	AA	AA	AA	AA	AA	AA	AA	AA	AA	AA	AA	AA	AA	AA	AA	AA	AA	AA	AA	AA	AA	AA	AA
chr1_18404031_A_G	1	18404031	TOP	[A/G]	AA	AA	AA	AA	AA	AA	AA	AA	AA	AA	AA	AA	AA	AA	AA	AA	AA	AA	AA	AA	AA	AA	AA	AA	AA	AA	AA	AA	AA	AA	AA	AA	AA	AA	AA	AA	AA	AA	AA	AA	AA	AA	AA	AA	AA
be_C_T_chr1_18438884	1	18438884	TOP	[A/G]	BB	BB	BB	BB	BB	BB	BB	BB	BB	BB	BB	BB	BB	BB	BB	BB	BB	BB	BB	BB	BB	BB	BB	BB	BB	BB	BB	BB	BB	BB	BB	BB	BB	BB	BB	BB	BB	BB	BB	BB	BB	BB	BB	BB	BB
chr1_18463066_A_G	1	18463066	TOP	[A/G]	AA	AA	AA	AA	AA	AA	AA	AA	AA	AA	AA	AA	AA	AA	AA	AA	AA	AA	AA	AA	AA	AA	AA	AA	AA	AA	AA	AA	AA	AA	AA	AA	AA	AA	AA	AA	AA	AA	AA	AA	AA	AA	AA	AA	AA
chr1_18464186_A_G	1	18464186	TOP	[A/G]	AA	AA	AA	AA	AA	AA	AA	AA	AA	AA	AA	AA	AA	AA	AA	AA	AA	AA	AA	AA	AA	AA	AA	AA	AA	AA	AA	AA	AA	AA	AA	AA	AA	AA	AA	AA	AA	AA	AA	AA	AA	AA	AA	AA	AA
li_G_A_chr1_18542179	1	18542179	BOT	[T/C]	BB	BB	BB	BB	BB	BB	BB	BB	BB	BB	BB	BB	BB	BB	BB	BB	BB	BB	BB	BB	BB	BB	BB	BB	BB	BB	BB	BB	BB	BB	BB	BB	BB	BB	BB	BB	BB	BB	BB	BB	BB	BB	BB	BB	BB
chr1_18544195_C_T	1	18544195	TOP	[A/G]	BB	BB	BB	BB	BB	BB	BB	BB	BB	BB	BB	BB	BB	BB	BB	BB	BB	BB	BB	BB	BB	BB	BB	BB	BB	BB	BB	BB	BB	BB	BB	BB	BB	BB	BB	BB	BB	BB	BB	BB	BB	BB	BB	BB	BB
chr1_18577173_C_T	1	18577173	BOT	[T/C]	BB	BB	BB	BB	BB	BB	BB	BB	BB	BB	BB	BB	BB	BB	BB	BB	BB	BB	BB	BB	BB	BB	BB	BB	BB	BB	BB	BB	BB	BB	BB	BB	BB	BB	BB	BB	BB	BB	BB	BB	BB	BB	BB	BB	BB
chr1_18582851_C_T	1	18582851	BOT	[T/C]	BB	BB	BB	BB	BB	BB	BB	BB	BB	BB	BB	BB	BB	BB	BB	BB	BB	BB	BB	BB	BB	BB	BB	BB	BB	BB	BB	BB	BB	BB	BB	BB	BB	BB	BB	BB	BB	BB	BB	BB	BB	BB	BB	BB	BB
chr1_18654390_C_T	1	18654390	BOT	[T/C]	BB	BB	BB	BB	BB	BB	BB	BB	BB	BB	BB	BB	BB	BB	BB	BB	BB	BB	BB	BB	BB	BB	BB	BB	BB	BB	BB	BB	BB	BB	BB	BB	BB	BB	BB	BB	BB	BB	BB	BB	BB	BB	BB	BB	BB
chr1_1870587_C_T	1	1870587	TOP	[A/G]	BB	BB	AB	AA	AB	AB	AB	AB	AA	AB	BB	BB	AB	AB	BB	AA	AA	BB	BB	AB	AB	AB	BB	BB	AA	AB	AA	AB	AA	AB	BB	BB	AB	AB	BB	AB	BB	BB	AB	AA	AB	AB	BB	AB	BB
chr1_18760209_A_G	1	18760209	TOP	[A/G]	BB	BB	BB	BB	BB	BB	BB	BB	BB	BB	BB	BB	BB	BB	BB	BB	BB	BB	BB	BB	BB	BB	BB	BB	BB	BB	BB	BB	BB	BB	BB	BB	BB	BB	BB	BB	BB	BB	BB	BB	BB	BB	BB	BB	BB
chr1_18883004_A_C	1	18883004	TOP	[A/C]	BB	BB	BB	BB	BB	BB	BB	BB	BB	BB	BB	BB	BB	BB	BB	BB	BB	BB	BB	BB	BB	BB	BB	BB	BB	BB	BB	BB	BB	BB	BB	BB	BB	BB	BB	BB	BB	BB	BB	BB	BB	BB	BB	BB	BB
be_G_A_chr1_18883369	1	18883369	TOP	[A/G]	BB	BB	BB	BB	BB	BB	BB	BB	BB	BB	BB	BB	BB	BB	BB	BB	BB	BB	BB	BB	BB	BB	BB	BB	BB	BB	BB	BB	BB	BB	BB	BB	BB	BB	BB	BB	BB	BB	BB	BB	BB	BB	BB	BB	BB
chr1_18902730_A_G	1	18902730	BOT	[T/C]	BB	BB	BB	BB	BB	BB	BB	BB	BB	BB	BB	BB	BB	BB	BB	BB	BB	BB	BB	BB	BB	BB	BB	BB	BB	BB	BB	BB	BB	BB	BB	BB	BB	BB	BB	BB	BB	BB	BB	BB	BB	BB	BB	BB	BB
chr1_18906357_A_G	1	18906357	BOT	[T/C]	AA	AA	AA	AA	AA	AA	AA	AA	AA	AA	AA	AA	AA	AA	AA	AA	AA	AA	AA	AA	AA	AA	AA	AA	AA	AA	AA	AA	AA	AA	AA	AA	AA	AA	AA	AA	AA	AA	AA	AA	AA	AA	AA	AA	AA
chr1_18973092_A_C	1	18973092	BOT	[T/G]	BB	BB	BB	BB	BB	BB	BB	BB	BB	BB	BB	BB	BB	BB	BB	BB	BB	BB	BB	BB	BB	BB	BB	BB	BB	BB	BB	BB	BB	BB	BB	BB	BB	BB	BB	BB	BB	BB	BB	BB	BB	BB	BB	BB	BB
ae_G_T_chr1_18980895	1	18980895	BOT	[T/G]	BB	BB	BB	BB	BB	BB	BB	BB	BB	BB	BB	BB	BB	BB	BB	BB	BB	BB	BB	BB	BB	BB	BB	BB	BB	BB	BB	BB	BB	BB	BB	BB	BB	BB	BB	BB	BB	BB	BB	BB	BB	BB	BB	BB	BB
chr1_19009322_A_G	1	19009322	TOP	[A/G]	AA	AA	AA	AA	AA	AA	AA	AA	AA	AA	AA	AA	AA	AA	AA	AA	AA	AA	AA	AA	AA	AA	AA	AA	AA	AA	AA	AA	AA	AA	AA	AA	AA	AA	AA	AA	AA	AA	AA	AA	AA	AA	AA	AA	AA
chr1_19097478_A_G	1	19097478	BOT	[T/C]	BB	BB	BB	BB	BB	BB	BB	BB	BB	BB	BB	BB	BB	BB	BB	BB	BB	BB	BB	BB	BB	BB	BB	BB	BB	BB	BB	BB	BB	BB	BB	BB	BB	BB	BB	BB	BB	BB	BB	BB	BB	BB	BB	BB	BB
chr1_19117448_C_T	1	19117448	BOT	[T/C]	AA	AA	AA	AA	AA	AA	AA	AA	AA	AA	AA	AA	AA	AA	AA	AA	AA	AA	AA	AA	AA	AA	AA	AA	AA	AA	AA	AA	AA	AA	AA	AA	AA	AA	AA	AA	AA	AA	AA	AA	AA	AA	AA	AA	AA
chr1_19151567_C_T	1	19151567	TOP	[A/G]	BB	BB	BB	BB	BB	BB	BB	BB	BB	BB	BB	BB	BB	BB	BB	BB	BB	BB	BB	BB	BB	BB	BB	BB	BB	BB	BB	BB	BB	BB	BB	BB	BB	BB	BB	BB	BB	BB	BB	BB	BB	BB	BB	BB	BB
li_A_G_chr1_1915459	1	1915459	TOP	[A/G]	AA	AA	AA	AA	AA	AA	AA	AA	AA	AA	AA	AA	AA	AA	AA	AA	AA	AA	AA	AA	AA	AA	AA	AA	AA	AA	AA	AA	AA	AA	AA	AA	AA	AA	AA	AA	AA	AA	AA	AA	AA	AA	AA	AA	AA
chr1_1915978_A_G	1	1915978	TOP	[A/G]	BB	BB	BB	BB	BB	BB	BB	BB	BB	BB	BB	BB	BB	BB	BB	BB	BB	BB	BB	BB	BB	BB	BB	BB	BB	BB	BB	BB	BB	BB	BB	BB	BB	BB	BB	BB	BB	BB	BB	BB	BB	BB	BB	BB	BB
chr1_19186859_A_G	1	19186859	BOT	[T/C]	BB	BB	BB	BB	BB	BB	BB	BB	BB	BB	BB	BB	BB	BB	BB	BB	BB	BB	BB	BB	BB	BB	BB	BB	BB	BB	BB	BB	BB	BB	BB	BB	BB	BB	BB	BB	BB	BB	BB	BB	BB	BB	BB	BB	BB
chr1_19224395_A_G	1	19224395	TOP	[A/G]	AA	AA	AA	AA	AA	AA	AA	AA	AA	AA	AA	AA	AA	AA	AA	AA	AA	AA	AA	AA	AA	AA	AA	AA	AA	AA	AA	AA	AA	AA	AA	AA	AA	AA	AA	AA	AA	AA	AA	AA	AA	AA	AA	AA	AA
chr1_19231080_C_T	1	19231080	TOP	[A/G]	BB	BB	BB	BB	BB	BB	BB	BB	BB	BB	BB	BB	BB	BB	BB	BB	BB	BB	BB	BB	BB	BB	BB	BB	BB	BB	BB	BB	BB	BB	BB	BB	BB	BB	BB	BB	BB	BB	BB	BB	BB	BB	BB	BB	BB
chr1_19257832_A_G	1	19257832	TOP	[A/G]	BB	BB	BB	BB	BB	BB	BB	BB	BB	BB	BB	BB	BB	BB	BB	BB	BB	BB	BB	BB	BB	BB	BB	BB	BB	BB	BB	BB	BB	BB	BB	BB	BB	BB	BB	BB	BB	BB	BB	BB	BB	BB	BB	BB	BB
chr1_19258880_C_T	1	19258880	BOT	[T/C]	BB	BB	BB	BB	BB	BB	BB	BB	BB	BB	BB	BB	BB	BB	BB	BB	BB	BB	BB	BB	BB	BB	BB	BB	BB	BB	BB	BB	BB	BB	BB	BB	BB	BB	BB	BB	BB	BB	BB	BB	BB	BB	BB	BB	BB
mu_o_C_T_chr1_19260976	1	19260976	BOT	[T/C]	BB	BB	BB	BB	BB	BB	BB	BB	BB	BB	BB	BB	BB	BB	BB	BB	BB	BB	BB	BB	BB	BB	BB	BB	BB	BB	BB	BB	BB	BB	BB	BB	BB	BB	BB	BB	BB	BB	BB	BB	BB	BB	BB	BB	BB
be_C_T_chr1_19335852	1	19335852	BOT	[T/C]	BB	BB	BB	BB	BB	BB	BB	BB	BB	BB	BB	BB	BB	BB	BB	BB	BB	BB	BB	BB	BB	BB	BB	BB	BB	BB	BB	BB	BB	BB	BB	BB	BB	BB	BB	BB	BB	BB	BB	BB	BB	BB	BB	BB	BB
lb_G_A_chr1_19365829	1	19365829	TOP	[A/G]	AA	AA	AA	AA	AA	AA	AA	AA	AA	AA	AA	AA	AA	AA	AA	AA	AA	AA	AA	AA	AA	AA	AA	AA	AA	AA	AA	AA	AA	AA	AA	AA	AA	AA	AA	AA	AA	AA	AA	AA	AA	AA	AA	AA	AA
ae_C_A_chr1_19396648	1	19396648	TOP	[A/C]	BB	BB	BB	BB	BB	BB	BB	BB	BB	BB	BB	BB	BB	BB	BB	BB	BB	BB	BB	BB	BB	BB	BB	BB	BB	BB	BB	BB	BB	BB	BB	BB	BB	BB	BB	BB	BB	BB	BB	BB	BB	BB	BB	BB	BB
chr1_1941422_A_C	1	1941422	BOT	[T/G]	BB	BB	BB	BB	BB	BB	BB	BB	BB	BB	BB	BB	BB	BB	BB	BB	BB	BB	BB	BB	BB	BB	BB	BB	BB	BB	BB	BB	BB	BB	BB	BB	BB	BB	BB	BB	BB	BB	BB	BB	BB	BB	BB	BB	BB
chr1_19434157_C_T	1	19434157	BOT	[T/C]	BB	BB	BB	BB	BB	BB	BB	BB	BB	BB	BB	BB	BB	BB	BB	BB	BB	BB	BB	BB	BB	BB	BB	BB	BB	BB	BB	BB	BB	BB	BB	BB	BB	BB	BB	BB	BB	BB	BB	BB	BB	BB	BB	BB	BB
chr1_19473556_A_G	1	19473556	BOT	[T/C]	BB	BB	BB	BB	BB	BB	BB	BB	BB	BB	BB	BB	BB	BB	BB	BB	BB	BB	BB	BB	BB	BB	BB	BB	BB	BB	BB	BB	BB	BB	BB	NC	BB	BB	BB	BB	BB	BB	BB	BB	BB	BB	BB	BB	BB
chr1_19509283_A_G	1	19509283	BOT	[T/C]	BB	BB	BB	BB	BB	BB	BB	BB	BB	BB	BB	BB	BB	BB	BB	BB	BB	BB	BB	BB	BB	BB	BB	BB	BB	BB	BB	BB	BB	BB	BB	BB	BB	BB	BB	BB	BB	BB	BB	BB	BB	BB	BB	BB	BB
mu_s_G_A_chr1_19528810	1	19528810	TOP	[A/G]	BB	BB	BB	BB	BB	BB	BB	BB	BB	BB	BB	BB	BB	BB	BB	BB	BB	BB	BB	BB	BB	BB	BB	BB	BB	BB	BB	BB	BB	BB	BB	BB	BB	BB	BB	BB	BB	BB	BB	BB	BB	BB	BB	BB	BB
chr1_19545452_C_T	1	19545452	TOP	[A/G]	AA	AA	AA	AA	AA	AA	AA	AA	AA	AA	AA	AA	AA	AA	AA	AA	AA	AA	AA	AA	AA	AA	AA	AA	AA	AA	AA	AA	AA	AA	AA	AA	AA	AA	AA	AA	AA	AA	AA	AA	AA	AA	AA	AA	AA
chr1_19563280_C_T	1	19563280	BOT	[T/C]	AA	AA	AA	AA	AA	AA	AA	AA	AA	AA	AA	AA	AA	AA	AA	AA	AA	AA	AA	AA	AA	AA	AA	AA	AA	AA	AA	AA	AA	AA	AA	AA	AA	AA	AA	AA	AA	AA	AA	AA	AA	AA	AA	AA	AA
chr1_19565862_C_T	1	19565862	TOP	[A/G]	AA	AA	AA	AA	AA	AA	AA	AA	AA	AA	AA	AA	AA	AA	AA	AA	AA	AA	AA	AA	AA	AA	AA	AA	AA	AA	AA	AA	AA	AA	AA	NC	AA	AA	AA	AA	AA	AA	AA	AA	AA	AA	AA	AA	AA
chr1_19576877_A_G	1	19576877	TOP	[A/G]	AA	AA	AA	AA	AA	AA	AA	AA	AA	AA	AA	AA	AA	AA	AA	AA	AA	AA	AA	AA	AA	AA	AA	AA	AA	AA	AA	AA	AA	AA	AA	NC	AA	AA	AA	AA	AA	AA	AA	AA	AA	AA	AA	AA	AA
chr1_19686518_A_G	1	19686518	BOT	[T/C]	BB	BB	BB	BB	BB	BB	BB	BB	BB	BB	BB	BB	BB	BB	BB	BB	BB	BB	BB	BB	BB	BB	BB	BB	BB	BB	BB	BB	BB	BB	BB	NC	BB	BB	BB	BB	BB	BB	BB	BB	BB	BB	BB	BB	BB
chr1_196881_C_T	1	196881	TOP	[A/G]	AA	AA	AA	AA	AA	AA	AA	AA	AA	AA	AA	AA	AA	AA	AA	AA	AA	AA	AA	AA	AA	AA	AA	AA	AA	AA	AA	AA	AA	AA	AA	AA	AA	AA	AA	AA	AA	AA	AA	AA	AA	AA	AA	AA	AA
chr1_19715227_C_T	1	19715227	BOT	[T/C]	AB	BB	BB	BB	AB	AA	AA	AB	AA	BB	AA	AB	AB	AA	AB	AA	AA	AB	AB	AA	AB	BB	AB	AA	BB	AB	AB	BB	AB	AA	AB	AB	AA	AA	AA	AB	AA	BB	AB	AB	AA	BB	AB	AB	AA
chr1_19758132_C_T	1	19758132	TOP	[A/G]	AA	AA	AA	AA	AA	AA	AA	AA	AA	AA	AA	AA	AA	AA	AA	AA	AA	AA	AA	AA	AA	AA	AA	AA	AA	AA	AA	AA	AA	AA	AA	AA	AA	AA	AA	AA	AA	AA	AA	AA	AA	AA	AA	AA	AA
chr1_19793242_C_T	1	19793242	BOT	[T/C]	AA	AA	AA	AA	AA	AA	AA	AA	AA	AA	AA	AA	AA	AA	AA	AA	AA	AA	AA	AA	AA	AA	AA	AA	AA	AA	AA	AA	AA	AA	AA	AA	AA	AA	AA	AA	AA	AA	AA	AA	AA	AA	AA	AA	AA
li_C_T_chr1_19827460	1	19827460	TOP	[A/G]	BB	BB	BB	BB	BB	BB	BB	BB	BB	BB	BB	BB	BB	BB	BB	BB	BB	BB	BB	BB	BB	BB	BB	BB	BB	BB	BB	BB	BB	BB	BB	BB	BB	BB	BB	BB	BB	BB	BB	BB	BB	BB	BB	BB	BB
chr1_19828192_C_T	1	19828192	TOP	[A/G]	BB	BB	BB	BB	BB	BB	BB	BB	BB	BB	BB	BB	BB	BB	BB	BB	BB	BB	BB	BB	BB	BB	BB	BB	BB	BB	BB	BB	BB	BB	BB	BB	BB	BB	BB	BB	BB	BB	BB	BB	BB	BB	BB	BB	BB
ae_T_C_chr1_19832137	1	19832137	TOP	[A/G]	AA	AA	AA	AA	AA	AA	AA	AA	AA	AA	AA	AA	AA	AA	AA	AA	AA	AA	AA	AA	AA	AA	AA	AA	AA	AA	AA	AA	AA	AA	AA	AA	AA	AA	AA	AA	AA	AA	AA	AA	AA	AA	AA	AA	AA
lb_G_A_chr1_19837314	1	19837314	TOP	[A/G]	BB	BB	BB	BB	BB	BB	BB	BB	BB	BB	BB	BB	BB	BB	BB	BB	BB	BB	BB	BB	BB	BB	BB	BB	BB	BB	BB	BB	BB	BB	BB	BB	BB	BB	BB	BB	BB	BB	BB	BB	BB	BB	BB	BB	BB
be_A_G_chr1_19852892	1	19852892	BOT	[T/C]	AA	AA	AA	AA	AA	AA	AA	AA	AA	AA	AA	AA	AA	AA	AA	AA	AA	AA	AA	AA	AA	AA	AA	AA	AA	AA	AA	AA	AA	AA	AA	AA	AA	AA	AA	AA	AA	AA	AA	AA	AA	AA	AA	AA	AA
chr1_19866437_A_C	1	19866437	TOP	[A/C]	AA	AA	AA	AA	AA	AA	AA	AA	AA	AA	AA	AA	AA	AA	AA	AA	AA	AA	AA	AA	AA	AA	AA	AA	AA	AA	AA	AA	AA	AA	AA	AA	AA	AA	AA	AA	AA	AA	AA	AA	AA	AA	AA	AA	AA
chr1_19868076_A_G	1	19868076	BOT	[T/C]	BB	BB	BB	BB	BB	BB	BB	BB	BB	BB	BB	BB	BB	BB	BB	BB	BB	BB	BB	BB	BB	BB	BB	BB	BB	BB	BB	BB	BB	BB	BB	BB	BB	BB	BB	BB	BB	BB	BB	BB	BB	BB	BB	BB	BB
chr1_19882962_A_C	1	19882962	BOT	[T/G]	AA	AA	AA	AA	AA	AA	AA	AA	AA	AA	AA	AA	AA	AA	AA	AA	AA	AA	AA	AA	AA	AA	AA	AA	AA	AA	AA	AA	AA	AA	AA	AA	AA	AA	AA	AA	AA	AA	AA	AA	AA	AA	AA	AA	AA
chr1_19895748_C_T	1	19895748	BOT	[T/C]	AB	BB	BB	BB	AB	AA	AA	AB	AA	BB	AA	AB	AB	AA	AB	AA	AA	AB	AB	AA	AB	BB	AB	AA	BB	AB	AB	BB	AB	AA	AB	AB	AA	AA	AA	AB	AA	BB	AB	AB	AA	BB	AB	AB	AA
chr1_19930494_A_C	1	19930494	TOP	[A/C]	AB	BB	BB	BB	AB	AA	AA	AB	AA	BB	AA	AB	AB	AA	AB	AA	AA	AB	AB	AA	AB	BB	AB	AA	BB	AB	AB	BB	AB	AA	AB	AB	AA	AA	AA	AB	AA	BB	AB	AB	AA	BB	AB	AB	AA
chr1_19975589_A_G	1	19975589	TOP	[A/G]	BB	BB	BB	BB	BB	BB	BB	BB	BB	BB	BB	BB	BB	BB	BB	BB	BB	BB	BB	BB	BB	BB	BB	BB	BB	BB	BB	BB	BB	BB	BB	BB	BB	BB	BB	BB	BB	BB	BB	BB	BB	BB	BB	BB	BB
chr1_19990759_A_G	1	19990759	BOT	[T/C]	AA	AA	AA	AA	AA	AA	AA	AA	AA	AA	AA	AA	AA	AA	AA	AA	AA	AA	AA	AA	AA	AA	AA	AA	AA	AA	AA	AA	AA	AA	AA	NC	AA	AA	AA	AA	AA	AA	AA	AA	AA	AA	AA	AA	AA
chr1_19998477_A_G	1	19998477	BOT	[T/C]	AA	AA	AA	AA	AA	AA	AA	AA	AA	AA	AA	AA	AA	AA	AA	AA	AA	AA	AA	AA	AA	AA	AA	AA	AA	AA	AA	AA	AA	AA	AA	AA	AA	AA	AA	AA	AA	AA	AA	AA	AA	AA	AA	AA	AA
chr1_20013004_A_G	1	20013004	BOT	[T/C]	AA	AA	AA	AA	AA	AA	AA	AA	AA	AA	AA	AA	AA	AA	AA	AA	AA	AA	AA	AA	AA	AA	AA	AA	AA	AA	AA	AA	AA	AA	AA	AA	AA	AA	AA	AA	AA	AA	AA	AA	AA	AA	AA	AA	AA
chr1_2013068_A_G	1	2013068	TOP	[A/G]	BB	BB	BB	BB	BB	BB	BB	BB	BB	BB	BB	BB	BB	BB	BB	BB	BB	BB	BB	BB	BB	BB	BB	BB	BB	BB	BB	BB	BB	BB	BB	BB	BB	BB	BB	BB	BB	BB	BB	BB	BB	BB	BB	BB	BB
be_G_A_chr1_20420677	1	20420677	TOP	[A/G]	BB	BB	BB	BB	BB	BB	BB	BB	BB	BB	BB	BB	BB	BB	BB	BB	BB	BB	BB	BB	BB	BB	BB	BB	BB	BB	BB	BB	BB	BB	BB	BB	BB	BB	BB	BB	BB	BB	BB	BB	BB	BB	BB	BB	BB
ae_C_T_chr1_20437670	1	20437670	TOP	[A/G]	BB	BB	BB	BB	BB	BB	BB	BB	BB	BB	BB	BB	BB	BB	BB	BB	BB	BB	BB	BB	BB	BB	BB	BB	BB	BB	BB	BB	BB	BB	BB	BB	BB	BB	BB	BB	BB	BB	BB	BB	BB	BB	BB	BB	BB
chr1_2049117_G_T	1	2049117	BOT	[T/G]	BB	BB	AB	AA	AB	AB	AB	AB	AA	AB	BB	BB	AB	AB	BB	AA	AA	BB	BB	AB	AB	AB	BB	BB	AA	AB	AA	AB	AA	AB	BB	NC	AB	AB	BB	AB	BB	BB	AB	AA	AB	AB	BB	AB	BB
mu_o_A_G_chr1_20627084	1	20627084	BOT	[T/C]	AA	AA	AA	AA	AA	AA	AA	AA	AA	AA	AA	AA	AA	AA	AA	AA	AA	AA	AA	AA	AA	AA	AA	AA	AA	AA	AA	AA	AA	AA	AA	AA	AA	AA	AA	AA	AA	AA	AA	AA	AA	AA	AA	AA	AA
chr1_20641842_C_T	1	20641842	BOT	[T/C]	AA	AA	AA	AA	AA	AA	AA	AA	AA	AA	AA	AA	AA	AA	AA	AA	AA	AA	AA	AA	AA	AA	AA	AA	AA	AA	AA	AA	AA	AA	AA	AA	AA	AA	AA	AA	AA	AA	AA	AA	AA	AA	AA	AA	AA
chr1_20642990_A_G	1	20642990	TOP	[A/G]	AB	BB	AB	BB	AB	AA	AA	AB	AA	BB	AA	AB	AB	AA	AB	AA	AA	AB	AB	AA	AB	BB	AB	AA	BB	AB	AB	BB	AB	AA	AB	AB	AA	AA	AA	AB	AA	BB	AB	AB	AA	BB	AB	AB	AA
chr1_20648785_C_T	1	20648785	TOP	[A/G]	AB	AA	AB	AA	NC	BB	BB	AB	BB	AA	BB	AB	AB	BB	AB	BB	BB	AB	AB	BB	AB	AA	AB	BB	AA	AB	AB	AA	AB	BB	AB	AB	BB	BB	BB	AB	BB	AA	AB	AB	BB	AA	AB	AB	BB
chr1_20723234_C_T	1	20723234	TOP	[A/G]	AA	AA	AA	AA	AA	AA	AA	AA	AA	AA	AA	AA	AA	AA	AA	AA	AA	AA	AA	AA	AA	AA	AA	AA	AA	AA	AA	AA	AA	AA	AA	AA	AA	AA	AA	AA	AA	AA	AA	AA	AA	AA	AA	AA	AA
chr1_20750265_C_T	1	20750265	TOP	[A/G]	AB	BB	AB	BB	NC	AB	AA	AB	AA	BB	AA	AB	AB	AA	AB	AA	AA	AB	AB	AA	AB	BB	AB	AA	BB	AB	AB	BB	AB	AA	AB	AB	AA	AA	AA	AB	AA	BB	AB	AB	AA	BB	AB	AB	AB
ae_T_C_chr1_20819501	1	20819501	TOP	[A/G]	AA	AA	AA	AA	AA	AA	AA	AA	AA	AA	AA	AA	AA	AA	AA	AA	AA	AA	AA	AA	AA	AA	AA	AA	AA	AA	AA	AA	AA	AA	AA	AA	AA	AA	AA	AA	AA	AA	AA	AA	AA	AA	AA	AA	AA
chr1_2083858_A_C	1	2083858	TOP	[A/C]	AA	AA	AA	AA	AA	AA	AA	AA	AA	AA	AA	AA	AA	AA	AA	AA	AA	AA	AA	AA	AA	AA	AA	AA	AA	AA	AA	AA	AA	AA	AA	AA	AA	AA	AA	AA	AA	AA	AA	AA	AA	AA	AA	AA	AA
chr1_20870639_A_C	1	20870639	BOT	[T/G]	BB	BB	BB	BB	BB	BB	BB	BB	BB	BB	BB	BB	BB	BB	BB	BB	BB	BB	BB	BB	BB	BB	BB	BB	BB	BB	BB	BB	BB	BB	BB	BB	BB	BB	BB	BB	BB	BB	BB	BB	BB	BB	BB	BB	BB
chr1_20879274_C_T	1	20879274	BOT	[T/C]	BB	BB	BB	BB	BB	BB	BB	BB	BB	BB	BB	BB	BB	BB	BB	BB	BB	BB	BB	BB	BB	BB	BB	BB	BB	BB	BB	BB	BB	BB	BB	BB	BB	BB	BB	BB	BB	BB	BB	BB	BB	BB	BB	BB	BB
chr1_20902008_G_T	1	20902008	TOP	[A/C]	BB	BB	BB	BB	BB	BB	BB	BB	BB	BB	BB	BB	BB	BB	BB	BB	BB	BB	BB	BB	BB	BB	BB	BB	BB	BB	BB	BB	BB	BB	BB	BB	BB	BB	BB	BB	BB	BB	BB	BB	BB	BB	BB	BB	BB
chr1_20933816_C_T	1	20933816	TOP	[A/G]	AB	AA	AB	AA	AB	AB	BB	AB	BB	AA	BB	AB	AB	BB	AB	BB	BB	AB	AB	BB	AB	AA	AB	BB	AA	AB	AB	AA	AB	BB	AB	AB	BB	BB	BB	AB	BB	AA	AB	AB	BB	AA	AB	AB	AB
chr1_20944785_A_G	1	20944785	BOT	[T/C]	AB	BB	AB	BB	AB	AB	AA	AB	AA	BB	AA	AB	AB	AA	AB	AA	AA	AB	AB	AA	AB	BB	AB	AA	BB	AB	AB	BB	AB	AA	AB	AB	AA	AA	AA	AB	AA	BB	AB	AB	AA	BB	AB	AB	AB
chr1_20985372_C_T	1	20985372	TOP	[A/G]	AB	AA	AB	AA	NC	AB	BB	AB	BB	AA	BB	AB	AB	BB	AB	BB	BB	AB	AB	BB	AB	AA	AB	BB	AA	AB	AB	AA	AB	BB	AB	AB	BB	BB	BB	AB	BB	AA	AB	AB	BB	AA	AB	AB	AB
chr1_21044474_C_T	1	21044474	BOT	[T/C]	BB	BB	BB	BB	BB	BB	BB	BB	BB	BB	BB	BB	BB	BB	BB	BB	BB	BB	BB	BB	BB	BB	BB	BB	BB	BB	BB	BB	BB	BB	BB	BB	BB	BB	BB	BB	BB	BB	BB	BB	BB	BB	BB	BB	BB
chr1_21076865_A_G	1	21076865	TOP	[A/G]	AA	AA	AA	AA	AA	AA	AA	AA	AA	AA	AA	AA	AA	AA	AA	AA	AA	AA	AA	AA	AA	AA	AA	AA	AA	AA	AA	AA	AA	AA	AA	AA	AA	AA	AA	AA	AA	AA	AA	AA	AA	AA	AA	AA	AA
chr1_21104634_A_C	1	21104634	TOP	[A/C]	BB	BB	BB	BB	BB	BB	BB	BB	BB	BB	BB	BB	BB	BB	BB	BB	BB	BB	BB	BB	BB	BB	BB	BB	BB	BB	BB	BB	BB	BB	BB	BB	BB	BB	BB	BB	BB	BB	BB	BB	BB	BB	BB	BB	BB
chr1_21111153_C_T	1	21111153	BOT	[T/C]	AA	AA	AA	AA	AA	AA	AA	AA	AA	AA	AA	AA	AA	AA	AA	AA	AA	AA	AA	AA	AA	AA	AA	AA	AA	AA	AA	AA	AA	AA	AA	NC	AA	AA	AA	AA	AA	AA	AA	AA	AA	AA	AA	AA	AA
chr1_21179164_G_T	1	21179164	TOP	[A/C]	BB	BB	BB	BB	BB	BB	BB	BB	BB	BB	BB	BB	BB	BB	BB	BB	BB	BB	BB	BB	BB	BB	BB	BB	BB	BB	BB	BB	BB	BB	BB	BB	BB	BB	BB	BB	BB	BB	BB	BB	BB	BB	BB	BB	BB
chr1_2119583_G_T	1	2119583	BOT	[T/G]	BB	BB	AB	AA	AB	AB	AB	AB	AA	AB	BB	BB	AB	AB	BB	AA	AA	BB	BB	AB	AB	AB	BB	BB	AA	AB	AA	AB	AA	AB	BB	NC	AB	AB	BB	AB	BB	BB	AB	AA	AB	AB	BB	AB	BB
chr1_21206468_A_C	1	21206468	TOP	[A/C]	BB	BB	BB	BB	BB	BB	BB	BB	BB	BB	BB	BB	BB	BB	BB	BB	BB	BB	BB	BB	BB	BB	BB	BB	BB	BB	BB	BB	BB	BB	BB	BB	BB	BB	BB	BB	BB	BB	BB	BB	BB	BB	BB	BB	BB
chr1_21223815_A_G	1	21223815	BOT	[T/C]	AB	BB	AB	BB	NC	AB	AA	AB	AB	BB	AA	AB	AB	AA	AB	AA	AA	AB	AB	AA	AB	BB	AB	AA	BB	AB	AB	BB	AB	AA	AB	AB	AA	AA	AA	AB	AA	BB	AB	AB	AA	BB	BB	AB	AB
chr1_21258195_G_T	1	21258195	TOP	[A/C]	BB	BB	BB	BB	BB	BB	BB	BB	BB	BB	BB	BB	BB	BB	BB	BB	BB	BB	BB	BB	BB	BB	BB	BB	BB	BB	BB	BB	BB	BB	BB	BB	BB	BB	BB	BB	BB	BB	BB	BB	BB	BB	BB	BB	BB
ae_T_C_chr1_21277715	1	21277715	TOP	[A/G]	AA	AA	AA	AA	AA	AA	AA	AA	AA	AA	AA	AA	AA	AA	AA	AA	AA	AA	AA	AA	AA	AA	AA	AA	AA	AA	AA	AA	AA	AA	AA	AA	AA	AA	AA	AA	AA	AA	AA	AA	AA	AA	AA	AA	AA
lb_T_C_chr1_21316324	1	21316324	TOP	[A/G]	AA	AA	AA	AA	AA	AA	AA	AA	AA	AA	AA	AA	AA	AA	AA	AA	AA	AA	AA	AA	AA	AA	AA	AA	AA	AA	AA	AA	AA	AA	AA	AA	AA	AA	AA	AA	AA	AA	AA	AA	AA	AA	AA	AA	AA
chr1_2136674_C_T	1	2136674	BOT	[T/C]	AA	AA	AA	AA	AA	AA	AA	AA	AA	AA	AA	AA	AA	AA	AA	AA	AA	AA	AA	AA	AA	AA	AA	AA	AA	AA	AA	AA	AA	AA	AA	AA	AA	AA	AA	AA	AA	AA	AA	AA	AA	AA	AA	AA	AA
chr1_21373487_C_T	1	21373487	BOT	[T/C]	AA	AA	AA	AA	AA	AA	AA	AA	AA	AA	AA	AA	AA	AA	AA	AA	AA	AA	AA	AA	AA	AA	AA	AA	AA	AA	AA	AA	AA	AA	AA	AA	AA	AA	AA	AA	AA	AA	AA	AA	AA	AA	AA	AA	AA
chr1_21394971_C_T	1	21394971	TOP	[A/G]	AA	AA	AA	AA	AA	AA	AA	AA	AA	AA	AA	AA	AA	AA	AA	AA	AA	AA	AA	AA	AA	AA	AA	AA	AA	AA	AA	AA	AA	AA	AA	AA	AA	AA	AA	AA	AA	AA	AA	AA	AA	AA	AA	AA	AA
chr1_21405071_C_T	1	21405071	BOT	[T/C]	BB	BB	BB	BB	BB	BB	BB	BB	BB	BB	BB	BB	BB	BB	BB	BB	BB	BB	BB	BB	BB	BB	BB	BB	BB	BB	BB	BB	BB	BB	BB	BB	BB	BB	BB	BB	BB	BB	BB	BB	BB	BB	BB	BB	BB
chr1_21430574_A_G	1	21430574	BOT	[T/C]	AB	AA	AB	AA	NC	AB	BB	AB	AB	AA	BB	AB	AB	BB	AB	BB	BB	AB	AB	BB	AB	AA	AB	BB	AA	AB	AB	AA	AB	BB	AB	AB	BB	BB	BB	AB	BB	AA	AB	AB	BB	AA	AA	AB	AB
chr1_2145603_A_C	1	2145603	BOT	[T/G]	BB	BB	BB	BB	BB	BB	BB	BB	BB	BB	BB	BB	BB	BB	BB	BB	BB	BB	BB	BB	BB	BB	BB	BB	BB	BB	BB	BB	BB	BB	BB	BB	BB	BB	BB	BB	BB	BB	BB	BB	BB	BB	BB	BB	BB
chr1_21503298_C_T	1	21503298	TOP	[A/G]	BB	BB	BB	BB	BB	BB	BB	BB	BB	BB	BB	BB	BB	BB	BB	BB	BB	BB	BB	BB	BB	BB	BB	BB	BB	BB	BB	BB	BB	BB	BB	BB	BB	BB	BB	BB	BB	BB	BB	BB	BB	BB	BB	BB	BB
lb_C_T_chr1_215048	1	215048	TOP	[A/G]	BB	BB	BB	BB	BB	BB	BB	BB	BB	BB	BB	BB	BB	BB	BB	BB	BB	BB	BB	BB	BB	BB	BB	BB	BB	BB	BB	BB	BB	BB	BB	BB	BB	BB	BB	BB	BB	BB	BB	BB	BB	BB	BB	BB	BB
chr1_21505077_C_T	1	21505077	TOP	[A/G]	AA	AA	AA	AA	AA	AA	AA	AA	AA	AA	AA	AA	AA	AA	AA	AA	AA	AA	AA	AA	AA	AA	AA	AA	AA	AA	AA	AA	AA	AA	AA	AA	AA	AA	AA	AA	AA	AA	AA	AA	AA	AA	AA	AA	AA
chr1_21600956_A_G	1	21600956	BOT	[T/C]	AB	AA	AB	AA	NC	AB	BB	AB	AB	AA	AB	AB	AB	BB	BB	BB	BB	AB	AB	BB	AB	AA	AB	BB	AA	AB	AB	AA	AB	AB	AB	AB	BB	BB	BB	AB	BB	AA	AB	AB	BB	AA	AA	AB	AA
chr1_21610516_C_T	1	21610516	BOT	[T/C]	AA	AA	AA	AA	AA	AA	AA	AA	AA	AA	AA	AA	AA	AA	AA	AA	AA	AA	AA	AA	AA	AA	AA	AA	AA	AA	AA	AA	AA	AA	AA	AA	AA	AA	AA	AA	AA	AA	AA	AA	AA	AA	AA	AA	AA
chr1_21676342_A_C	1	21676342	BOT	[T/G]	BB	BB	BB	BB	BB	BB	BB	BB	BB	BB	BB	BB	BB	BB	BB	BB	BB	BB	BB	BB	BB	BB	BB	BB	BB	BB	BB	BB	BB	BB	BB	BB	BB	BB	BB	BB	BB	BB	BB	BB	BB	BB	BB	BB	BB
mu_s_T_C_chr1_21684667	1	21684667	BOT	[T/C]	AA	AA	AA	AA	AA	AA	AA	AA	AA	AA	AA	AA	AA	AA	AA	AA	AA	AA	AA	AA	AA	AA	AA	AA	AA	AA	AA	AA	AA	AA	AA	AA	AA	AA	AA	AA	AA	AA	AA	AA	AA	AA	AA	AA	AA
chr1_21713586_A_G	1	21713586	BOT	[T/C]	BB	BB	BB	BB	BB	BB	BB	BB	BB	BB	BB	BB	BB	BB	BB	BB	BB	BB	BB	BB	BB	BB	BB	BB	BB	BB	BB	BB	BB	BB	BB	BB	BB	BB	BB	BB	BB	BB	BB	BB	BB	BB	BB	BB	BB
chr1_21718827_A_G	1	21718827	BOT	[T/C]	AA	AA	AA	AA	AA	AA	AA	AA	AA	AA	AA	AA	AA	AA	AA	AA	AA	AA	AA	AA	AA	AA	AA	AA	AA	AA	AA	AA	AA	AA	AA	AA	AA	AA	AA	AA	AA	AA	AA	AA	AA	AA	AA	AA	AA
be_T_C_chr1_21811846	1	21811846	BOT	[T/C]	AA	AA	AA	AA	AA	AA	AA	AA	AA	AA	AA	AA	AA	AA	AA	AA	AA	AA	AA	AA	AA	AA	AA	AA	AA	AA	AA	AA	AA	AA	AA	AA	AA	AA	AA	AA	AA	AA	AA	AA	AA	AA	AA	AA	AA
chr1_21860582_C_T	1	21860582	BOT	[T/C]	AA	AA	AA	AA	AA	AA	AA	AA	AA	AA	AA	AA	AA	AA	AA	AA	AA	AA	AA	AA	AA	AA	AA	AA	AA	AA	AA	AA	AA	AA	AA	AA	AA	AA	AA	AA	AA	AA	AA	AA	AA	AA	AA	AA	AA
chr1_21894243_C_T	1	21894243	TOP	[A/G]	BB	BB	BB	BB	BB	BB	BB	BB	BB	BB	BB	BB	BB	BB	BB	BB	BB	BB	BB	BB	BB	BB	BB	BB	BB	BB	BB	BB	BB	BB	BB	BB	BB	BB	BB	BB	BB	BB	BB	BB	BB	BB	BB	BB	BB
SNP1025_100	1	21938260	TOP	[A/G]	AB	BB	AB	BB	AB	AB	AA	AB	AB	BB	AB	AB	AB	AA	AA	AA	AA	AB	AB	AA	AB	BB	AB	AA	BB	AB	AB	BB	AB	AA	AB	AB	AA	AA	AA	AB	AA	BB	AB	AB	AA	BB	BB	AB	AB
chr1_21967275_A_G	1	21967275	BOT	[T/C]	AB	BB	AB	BB	AB	AB	AA	AB	AB	BB	AB	AB	AB	AA	AA	AA	AA	AB	AB	AA	AB	BB	AB	AA	BB	AB	AB	BB	AB	AA	AB	AB	AA	AA	AA	AB	AA	BB	AB	AB	AA	BB	BB	AB	AB
lb_A_G_chr1_2201992	1	2201992	TOP	[A/G]	AA	AA	AA	AA	AA	AA	AA	AA	AA	AA	AA	AA	AA	AA	AA	AA	AA	AA	AA	AA	AA	AA	AA	AA	AA	AA	AA	AA	AA	AA	AA	AA	AA	AA	AA	AA	AA	AA	AA	AA	AA	AA	AA	AA	AA
chr1_22066956_G_T	1	22066956	TOP	[A/C]	BB	BB	BB	BB	BB	BB	BB	BB	BB	BB	BB	BB	BB	BB	BB	BB	BB	BB	BB	BB	BB	BB	BB	BB	BB	BB	BB	BB	BB	BB	BB	BB	BB	BB	BB	BB	BB	BB	BB	BB	BB	BB	BB	BB	BB
chr1_22075765_C_T	1	22075765	BOT	[T/C]	AA	AA	AA	AA	AA	AA	AA	AA	AA	AA	AA	AA	AA	AA	AA	AA	AA	AA	AA	AA	AA	AA	AA	AA	AA	AA	AA	AA	AA	AA	AA	NC	AA	AA	AA	AA	AA	AA	AA	AA	AA	AA	AA	AA	AA
chr1_22107348_G_T	1	22107348	BOT	[T/G]	AA	AA	AA	AA	AA	AA	AA	AA	AA	AA	AA	AA	AA	AA	AA	AA	AA	AA	AA	AA	AA	AA	AA	AA	AA	AA	AA	AA	AA	AA	AA	AA	AA	AA	AA	AA	AA	AA	AA	AA	AA	AA	AA	AA	AA
chr1_22133457_A_C	1	22133457	TOP	[A/C]	AB	AA	AB	AA	NC	AB	BB	AB	AB	AA	AB	AB	AB	BB	BB	BB	BB	AB	AB	BB	AB	AA	AB	BB	AA	AB	AB	AA	AB	AB	AB	AB	BB	BB	BB	AB	BB	AA	AB	AB	BB	AA	AA	AB	AB
chr1_22184356_C_T	1	22184356	TOP	[A/G]	AA	AA	AA	AA	AA	AA	AA	AA	AA	AA	AA	AA	AA	AA	AA	AA	AA	AA	AA	AA	AA	AA	AA	AA	AA	AA	AA	AA	AA	AA	AA	AA	AA	AA	AA	AA	AA	AA	AA	AA	AA	AA	AA	AA	AA
chr1_22216753_A_G	1	22216753	BOT	[T/C]	AB	BB	AB	BB	AB	AB	AA	AB	AB	BB	AB	AB	AB	AA	AA	AA	AA	AB	AB	AA	AB	BB	AB	AA	BB	AB	AB	BB	AB	AB	AB	AB	AA	AA	AA	AB	AA	BB	AB	AB	AA	BB	BB	AB	AB
ae_A_G_chr1_22233155	1	22233155	BOT	[T/C]	AA	AA	AA	AA	AA	AA	AA	AA	AA	AA	AA	AA	AA	AA	AA	AA	AA	AA	AA	AA	AA	AA	AA	AA	AA	AA	AA	AA	AA	AA	AA	AA	AA	AA	AA	AA	AA	AA	AA	AA	AA	AA	AA	AA	AA
chr1_22273966_A_G	1	22273966	BOT	[T/C]	AB	BB	AB	BB	AB	AB	AA	AB	AB	BB	AB	AB	AB	AA	AA	AA	AA	AB	AB	AA	AB	BB	AB	AA	BB	AB	AB	BB	AB	AB	AB	AB	AA	AA	AA	AB	AA	BB	AB	AB	AA	BB	BB	AB	BB
lb_G_A_chr1_22309283	1	22309283	TOP	[A/G]	BB	BB	BB	BB	BB	BB	BB	BB	BB	BB	BB	BB	BB	BB	BB	BB	BB	BB	BB	BB	BB	BB	BB	BB	BB	BB	BB	BB	BB	BB	BB	BB	BB	BB	BB	BB	BB	BB	BB	BB	BB	BB	BB	BB	BB
chr1_22322441_G_T	1	22322441	BOT	[T/G]	AA	AA	AA	AA	AA	AA	AA	AA	AA	AA	AA	AA	AA	AA	AA	AA	AA	AA	AA	AA	AA	AA	AA	AA	AA	AA	AA	AA	AA	AA	AA	NC	AA	AA	AA	AA	AA	AA	AA	AA	AA	AA	AA	AA	AA
chr1_22328219_C_T	1	22328219	BOT	[T/C]	BB	BB	BB	BB	BB	BB	BB	BB	BB	BB	BB	BB	BB	BB	BB	BB	BB	BB	BB	BB	BB	BB	BB	BB	BB	BB	BB	BB	BB	BB	BB	BB	BB	BB	BB	BB	BB	BB	BB	BB	BB	BB	BB	BB	BB
cn_A_G_chr1_2232932	1	2232932	TOP	[A/G]	AA	AA	AA	AA	AA	AA	AA	AA	AA	AA	AA	AA	AA	AA	AA	AA	AA	AA	AA	AA	AA	AA	AA	AA	AA	AA	AA	AA	AA	AA	AA	AA	AA	AA	AA	AA	AA	AA	AA	AA	AA	AA	AA	AA	AA
chr1_22359683_A_G	1	22359683	BOT	[T/C]	AB	BB	AB	BB	AB	AB	AA	AB	AB	BB	AB	AB	AB	AA	AA	AA	AA	AB	AB	AA	AB	BB	AB	AA	BB	AB	AB	BB	AB	AB	AB	AB	AA	AA	AA	AB	AA	BB	AB	AB	AA	BB	BB	AB	BB
li_A_G_chr1_22385418	1	22385418	BOT	[T/C]	AA	AA	AA	AA	AA	AA	AA	AA	AA	AA	AA	AA	AA	AA	AA	AA	AA	AA	AA	AA	AA	AA	AA	AA	AA	AA	AA	AA	AA	AA	AA	AA	AA	AA	AA	AA	AA	AA	AA	AA	AA	AA	AA	AA	AA
cn_G_A_chr1_22426516	1	22426516	TOP	[A/G]	BB	BB	BB	BB	BB	BB	BB	BB	BB	BB	BB	BB	BB	BB	BB	BB	BB	BB	BB	BB	BB	BB	BB	BB	BB	BB	BB	BB	BB	BB	BB	BB	BB	BB	BB	BB	BB	BB	BB	BB	BB	BB	BB	BB	BB
chr1_22428538_C_T	1	22428538	TOP	[A/G]	AA	AA	AA	AA	AA	AA	AA	AA	AA	AA	AA	AA	AA	AA	AA	AA	AA	AA	AA	AA	AA	AA	AA	AA	AA	AA	AA	AA	AA	AA	AA	AA	AA	AA	AA	AA	AA	AA	AA	AA	AA	AA	AA	AA	AA
chr1_2243289_A_G	1	2243289	TOP	[A/G]	AA	AA	AA	AA	AA	AA	AA	AA	AA	AA	AA	AA	AA	AA	AA	AA	AA	AA	AA	AA	AA	AA	AA	AA	AA	AA	AA	AA	AA	AA	AA	AA	AA	AA	AA	AA	AA	AA	AA	AA	AA	AA	AA	AA	AA
chr1_22466694_A_C	1	22466694	BOT	[T/G]	AB	AA	AB	AA	NC	AB	BB	AB	AA	AA	AB	AB	AB	BB	BB	BB	BB	AB	AB	BB	AB	AA	AB	BB	AA	AB	AB	AA	AB	AB	AB	AB	BB	AB	BB	AB	BB	AA	AB	AB	BB	AA	AA	AB	AA
be_T_G_chr1_2247383	1	2247383	BOT	[T/G]	AA	AA	AA	AA	AA	AA	AA	AA	AA	AA	AA	AA	AA	AA	AA	AA	AA	AA	AA	AA	AA	AA	AA	AA	AA	AA	AA	AA	AA	AA	AA	AA	AA	AA	AA	AA	AA	AA	AA	AA	AA	AA	AA	AA	AA
chr1_22481214_A_G	1	22481214	TOP	[A/G]	AB	AA	AB	AA	NC	AB	BB	AB	AA	AA	AB	AB	AB	BB	BB	BB	BB	AB	AB	BB	AB	AA	AB	BB	AA	AB	AB	AA	AB	AB	AB	AB	BB	AB	BB	AB	BB	AA	AB	AB	BB	AA	AA	AB	AA
chr1_22498675_A_G	1	22498675	TOP	[A/G]	AA	AA	AA	AA	AA	AA	AA	AA	AA	AA	AA	AA	AA	AA	AA	AA	AA	AA	AA	AA	AA	AA	AA	AA	AA	AA	AA	AA	AA	AA	AA	AA	AA	AA	AA	AA	AA	AA	AA	AA	AA	AA	AA	AA	AA
chr1_22540675_A_G	1	22540675	BOT	[T/C]	BB	BB	BB	BB	BB	BB	BB	BB	BB	BB	BB	BB	BB	BB	BB	BB	BB	BB	BB	BB	BB	BB	BB	BB	BB	BB	BB	BB	BB	BB	BB	BB	BB	BB	BB	BB	BB	BB	BB	BB	BB	BB	BB	BB	BB
mu_o_G_A_chr1_22580392	1	22580392	BOT	[T/C]	BB	BB	BB	BB	BB	BB	BB	BB	BB	BB	BB	BB	BB	BB	BB	BB	BB	BB	BB	BB	BB	BB	BB	BB	BB	BB	BB	BB	BB	BB	BB	BB	BB	BB	BB	BB	BB	BB	BB	BB	BB	BB	BB	BB	BB
chr1_22609084_C_T	1	22609084	BOT	[T/C]	AA	AA	AA	AA	AA	AA	AA	AA	AA	AA	AA	AA	AA	AA	AA	AA	AA	AA	AA	AA	AA	AA	AA	AA	AA	AA	AA	AA	AA	AA	AA	AB	AA	AA	AA	AA	AA	AA	AA	AA	AA	AA	AA	AA	AA
chr1_22644187_C_T	1	22644187	BOT	[T/C]	BB	BB	BB	BB	BB	BB	BB	BB	BB	BB	BB	BB	BB	BB	BB	BB	BB	BB	BB	BB	BB	BB	BB	BB	BB	BB	BB	BB	BB	BB	BB	NC	BB	BB	BB	BB	BB	BB	BB	BB	BB	BB	BB	BB	BB
mu_s_A_G_chr1_22671989	1	22671989	BOT	[T/C]	AA	AA	AA	AA	AA	AA	AA	AA	AA	AA	AA	AA	AA	AA	AA	AA	AA	AA	AA	AA	AA	AA	AA	AA	AA	AA	AA	AA	AA	AA	AA	AA	AA	AA	AA	AA	AA	AA	AA	AA	AA	AA	AA	AA	AA
chr1_22679750_A_C	1	22679750	BOT	[T/G]	AB	AA	AB	AA	NC	AB	BB	AB	AA	AA	AB	AB	AB	BB	BB	BB	BB	AB	AB	BB	AB	AA	AB	BB	AA	AB	AB	AA	AB	AB	AB	AB	BB	AB	BB	AB	BB	AA	AB	AB	BB	AA	AA	AB	AA
SNP1021_163	1	22715654	TOP	[A/G]	AA	AA	AA	AA	AA	AA	AA	AA	AA	AA	AA	AA	AA	AA	AA	AA	AA	AA	AA	AA	AA	AA	AA	AA	AA	AA	AA	AA	AA	AA	AA	AA	AA	AA	AA	AA	AA	AA	AA	AA	AA	AA	AA	AA	AA
SNP1021_163	1	22715654	TOP	[A/G]	AA	AA	AA	AA	AA	AA	AA	AA	AA	AA	AA	AA	AA	AA	AA	AA	AA	AA	AA	AA	AA	AA	AA	AA	AA	AA	AA	AA	AA	AA	AA	AA	AA	AA	AA	AA	AA	AA	AA	AA	AA	AA	AA	AA	AA
chr1_22715654_C_T	1	22715654	BOT	[T/C]	AA	AA	AA	AA	AA	AA	AA	AA	AA	AA	AA	AA	AA	AA	AA	AA	AA	AA	AA	AA	AA	AA	AA	AA	AA	AA	AA	AA	AA	AA	AA	AA	AA	AA	AA	AA	AA	AA	AA	AA	AA	AA	AA	AA	AA
chr1_22715654_C_T	1	22715654	BOT	[T/C]	AA	AA	AA	AA	AA	AA	AA	AA	AA	AA	AA	AA	AA	AA	AA	AA	AA	AA	AA	AA	AA	AA	AA	AA	AA	AA	AA	AA	AA	AA	AA	AA	AA	AA	AA	AA	AA	AA	AA	AA	AA	AA	AA	AA	AA
chr1_22750062_C_T	1	22750062	TOP	[A/G]	AA	AA	AA	AA	AA	AA	AA	AA	AA	AA	AA	AA	AA	AA	AA	AA	AA	AA	AA	AA	AA	AA	AA	AA	AA	AA	AA	AA	AA	AA	AA	AA	AA	AA	AA	AA	AA	AA	AA	AA	AA	AA	AA	AA	AA
cn_T_C_chr1_22750526	1	22750526	BOT	[T/C]	AA	AA	AA	AA	AA	AA	AA	AA	AA	AA	AA	AA	AA	AA	AA	AA	AA	AA	AA	AA	AA	AA	AA	AA	AA	AA	AA	AA	AA	AA	AA	AA	AA	AA	AA	AA	AA	AA	AA	AA	AA	AA	AA	AA	AA
chr1_22783490_G_T	1	22783490	TOP	[A/C]	AB	AA	AB	AA	AB	AB	BB	AB	AA	AA	AB	AB	AB	BB	BB	BB	BB	AB	AB	BB	AB	AA	AB	BB	AA	AB	AB	AA	AB	AB	AB	AB	BB	AB	BB	AB	BB	AA	AB	AB	BB	AA	AA	AB	AA
lb_A_G_chr1_22783556	1	22783556	TOP	[A/G]	AA	AA	AA	AA	AA	AA	AA	AA	AA	AA	AA	AA	AA	AA	AA	AA	AA	AA	AA	AA	AA	AA	AA	AA	AA	AA	AA	AA	AA	AA	AA	AA	AA	AA	AA	AA	AA	AA	AA	AA	AA	AA	AA	AA	AA
chr1_22822369_A_G	1	22822369	TOP	[A/G]	AB	BB	AB	BB	AB	AB	AA	AB	BB	BB	AB	AB	AB	AA	AA	AA	AA	AB	AB	AA	AB	BB	AB	AA	BB	AB	AB	BB	AB	AB	AB	AB	AA	AB	AA	AB	NC	BB	AB	AB	AA	BB	BB	AB	BB
chr1_22849187_A_C	1	22849187	TOP	[A/C]	BB	BB	BB	BB	BB	BB	BB	BB	BB	BB	BB	BB	BB	BB	BB	BB	BB	BB	BB	BB	BB	BB	BB	BB	BB	BB	BB	BB	BB	BB	BB	BB	BB	BB	BB	BB	BB	BB	BB	BB	BB	BB	BB	BB	BB
chr1_22857939_C_T	1	22857939	BOT	[T/C]	AB	BB	AB	BB	NC	AB	AA	AB	BB	BB	AB	AB	AB	AA	AA	AA	AA	AB	AB	AA	AB	BB	AB	AA	BB	AB	AB	BB	AB	AB	AB	AB	AA	AB	AA	AB	AA	BB	AB	AB	AA	BB	BB	AB	BB
chr1_22921027_A_C	1	22921027	TOP	[A/C]	AB	AA	AB	AA	NC	AB	BB	AB	AA	AA	AB	AB	AB	BB	BB	BB	BB	AB	AB	BB	AB	AA	AB	BB	AA	AB	AB	AA	AB	AB	AB	AB	BB	AB	BB	AB	BB	AA	AB	AB	BB	AA	AA	AB	AA
chr1_2296184_A_G	1	2296184	BOT	[T/C]	BB	BB	AB	AA	AB	AB	AB	AB	AA	AB	BB	BB	AB	AB	BB	AA	AA	BB	BB	AB	AB	AB	BB	BB	AA	AB	AA	AB	AA	AB	BB	NC	AB	AB	BB	AB	BB	BB	AB	AA	AB	AB	BB	AB	BB
chr1_22964178_A_G	1	22964178	TOP	[A/G]	BB	BB	BB	BB	BB	BB	BB	BB	BB	BB	BB	BB	BB	BB	BB	BB	BB	BB	BB	BB	BB	BB	BB	BB	BB	BB	BB	BB	BB	BB	BB	BB	BB	BB	BB	BB	BB	BB	BB	BB	BB	BB	BB	BB	BB
chr1_23000434_C_T	1	23000434	BOT	[T/C]	AB	BB	AB	BB	AB	AB	AA	AB	BB	BB	AB	AB	AB	AA	AA	AA	AA	AB	AB	AA	AB	BB	AB	AA	BB	AB	AB	BB	AB	AB	AB	AB	AA	AB	AA	AB	AA	BB	AB	AB	AA	BB	BB	AB	BB
be_A_G_chr1_230083	1	230083	TOP	[A/G]	AA	AA	AA	AA	AA	AA	AA	AA	AA	AA	AA	AA	AA	AA	AA	AA	AA	AA	AA	AA	AA	AA	AA	AA	AA	AA	AA	AA	AA	AA	AA	AA	AA	AA	AA	AA	AA	AA	AA	AA	AA	AA	AA	AA	AA
chr1_2425051_A_G	1	2425051	BOT	[T/C]	BB	BB	BB	BB	BB	BB	BB	BB	BB	BB	BB	BB	BB	BB	BB	BB	BB	BB	BB	BB	BB	BB	BB	BB	BB	BB	BB	BB	BB	BB	BB	BB	BB	BB	BB	BB	BB	BB	BB	BB	BB	BB	BB	BB	BB
chr1_2438051_G_T	1	2438051	BOT	[T/G]	BB	AB	AB	AA	AB	AB	AB	AB	AA	AB	BB	BB	AB	AB	BB	AA	AA	BB	BB	AB	AB	AB	BB	BB	AA	AB	AA	AB	AA	AB	BB	NC	AB	AB	BB	AB	BB	BB	AB	AA	AB	AB	BB	AB	BB
chr1_2465455_A_C	1	2465455	BOT	[T/G]	NC	AB	AB	BB	AB	AB	AB	AB	BB	AB	AA	AA	AB	AB	AA	BB	BB	AA	AA	AB	AB	AB	AA	AA	BB	AB	BB	AB	BB	AB	AA	AB	AB	AB	AA	AB	AA	AA	AB	BB	AB	AB	AA	AB	AA
chr1_2477665_C_T	1	2477665	BOT	[T/C]	AA	AB	AB	BB	AB	AB	AB	AB	BB	AB	AA	AA	AB	AB	AA	BB	BB	AA	AA	AB	AB	AB	AA	AA	BB	AB	BB	AB	BB	AB	AA	NC	AB	AB	AA	AB	AA	AA	AB	BB	AB	AB	AA	AB	AA
cn_C_T_chr1_249428	1	249428	BOT	[T/C]	BB	BB	BB	BB	BB	BB	BB	BB	BB	BB	BB	BB	BB	BB	BB	BB	BB	BB	BB	BB	BB	BB	BB	BB	BB	BB	BB	BB	BB	BB	BB	BB	BB	BB	BB	BB	BB	BB	BB	BB	BB	BB	BB	BB	BB
ae_C_T_chr1_250099	1	250099	BOT	[T/C]	BB	BB	BB	BB	BB	BB	BB	BB	BB	BB	BB	BB	BB	BB	BB	BB	BB	BB	BB	BB	BB	BB	BB	BB	BB	BB	BB	BB	BB	BB	BB	BB	BB	BB	BB	BB	BB	BB	BB	BB	BB	BB	BB	BB	BB
chr1_2511205_C_T	1	2511205	BOT	[T/C]	BB	AB	AB	AA	AB	AB	AB	AB	AA	AB	BB	BB	AB	AB	BB	AA	AA	BB	BB	AB	AB	AB	BB	BB	AA	AB	AA	AB	AA	AB	BB	NC	AB	AB	BB	AB	BB	BB	AB	AA	AB	AB	BB	AB	BB
chr1_2532098_C_T	1	2532098	TOP	[A/G]	AA	AA	AA	AA	AA	AA	AA	AA	AA	AA	AA	AA	AA	AA	AA	AA	AA	AA	AA	AA	AA	AA	AA	AA	AA	AA	AA	AA	AA	AA	AA	AA	AA	AA	AA	AA	AA	AA	AA	AA	AA	AA	AA	AA	AA
chr1_2547257_C_T	1	2547257	BOT	[T/C]	AA	AA	AA	AA	AA	AA	AA	AA	AA	AA	AA	AA	AA	AA	AA	AA	AA	AA	AA	AA	AA	AA	AA	AA	AA	AA	AA	AA	AA	AA	AA	AA	AA	AA	AA	AA	AA	AA	AA	AA	AA	AA	AA	AA	AA
chr1_2582787_G_T	1	2582787	BOT	[T/G]	AA	AA	AA	AA	AA	AA	AA	AA	AA	AA	AA	AA	AA	AA	AA	AA	AA	AA	AA	AA	AA	AA	AA	AA	AA	AA	AA	AA	AA	AA	AA	AA	AA	AA	AA	AA	AA	AA	AA	AA	AA	AA	AA	AA	AA
chr1_261342_A_G	1	261342	BOT	[T/C]	BB	BB	BB	BB	BB	BB	BB	BB	BB	BB	BB	BB	BB	BB	BB	BB	BB	BB	BB	BB	BB	BB	BB	BB	BB	BB	BB	BB	BB	BB	BB	BB	BB	BB	BB	BB	BB	BB	BB	BB	BB	BB	BB	BB	BB
chr1_2624505_G_T	1	2624505	TOP	[A/C]	AA	AA	AA	AA	AA	AA	AA	AA	AA	AA	AA	AA	AA	AA	AA	AA	AA	AA	AA	AA	AA	AA	AA	AA	AA	AA	AA	AA	AA	AA	AA	AA	AA	AA	AA	AA	AA	AA	AA	AA	AA	AA	AA	AA	AA
chr1_2653364_A_C	1	2653364	TOP	[A/C]	BB	AB	AB	AA	AB	AB	AB	AB	AA	AB	BB	BB	AB	AB	BB	AA	AA	BB	BB	AB	AB	AB	BB	BB	AA	AB	AA	AB	AA	AB	BB	NC	AB	AB	BB	AB	BB	BB	AB	AA	AB	AB	BB	AB	BB
chr1_2690277_A_G	1	2690277	BOT	[T/C]	AA	AA	AA	AA	AA	AA	AA	AA	AA	AA	AA	AA	AA	AA	AA	AA	AA	AA	AA	AA	AA	AA	AA	AA	AA	AA	AA	AA	AA	AA	AA	AA	AA	AA	AA	AA	AA	AA	AA	AA	AA	AA	AA	AA	AA
be_G_A_chr1_2693043	1	2693043	BOT	[T/C]	BB	BB	BB	BB	BB	BB	BB	BB	BB	BB	BB	BB	BB	BB	BB	BB	BB	BB	BB	BB	BB	BB	BB	BB	BB	BB	BB	BB	BB	BB	BB	BB	BB	BB	BB	BB	BB	BB	BB	BB	BB	BB	BB	BB	BB
lb_G_A_chr1_2696217	1	2696217	TOP	[A/G]	BB	BB	BB	BB	BB	BB	BB	BB	BB	BB	BB	BB	BB	BB	BB	BB	BB	BB	BB	BB	BB	BB	BB	BB	BB	BB	BB	BB	BB	BB	BB	BB	BB	BB	BB	BB	BB	BB	BB	BB	BB	BB	BB	BB	BB
chr1_27655_C_T	1	27655	TOP	[A/G]	BB	BB	BB	BB	BB	BB	BB	BB	BB	BB	BB	BB	BB	BB	BB	BB	BB	BB	BB	BB	BB	BB	BB	BB	BB	BB	BB	BB	BB	BB	BB	BB	BB	BB	BB	BB	BB	BB	BB	BB	BB	BB	BB	BB	BB
chr1_2766340_C_T	1	2766340	TOP	[A/G]	AA	AA	AA	AA	AA	AA	AA	AA	AA	AA	AA	AA	AA	AA	AA	AA	AA	AA	AA	AA	AA	AA	AA	AA	AA	AA	AA	AA	AA	AA	AA	AA	AA	AA	AA	AA	AA	AA	AA	AA	AA	AA	AA	AA	AA
chr1_2793596_C_T	1	2793596	BOT	[T/C]	AA	AA	AA	AA	AA	AA	AA	AA	AA	AA	AA	AA	AA	AA	AA	AA	AA	AA	AA	AA	AA	AA	AA	AA	AA	AA	AA	AA	AA	AA	AA	AA	AA	AA	AA	AA	AA	AA	AA	AA	AA	AA	AA	AA	AA
chr1_2796258_C_T	1	2796258	BOT	[T/C]	BB	BB	BB	BB	BB	BB	BB	BB	BB	BB	BB	BB	BB	BB	BB	BB	BB	BB	BB	BB	BB	BB	BB	BB	BB	BB	BB	BB	BB	BB	BB	BB	BB	BB	BB	BB	BB	BB	BB	BB	BB	BB	BB	BB	BB
chr1_2824341_C_T	1	2824341	TOP	[A/G]	AA	AA	AA	AA	AA	AA	AA	AA	AA	AA	AA	AA	AA	AA	AA	AA	AA	AA	AA	AA	AA	AA	AA	AA	AA	AA	AA	AA	AA	AA	AA	AA	AA	AA	AA	AA	AA	AA	AA	AA	AA	AA	AA	AA	AA
chr1_2844356_C_T	1	2844356	BOT	[T/C]	AA	AB	AB	BB	AB	AB	AB	AB	BB	AB	AA	AB	AB	AB	AA	BB	BB	AA	AA	AB	AB	AB	AB	AA	BB	AB	BB	AB	BB	AB	AA	NC	AB	AB	AA	AB	AA	AA	AB	BB	AB	AB	AA	AB	AA
chr1_2880420_A_G	1	2880420	TOP	[A/G]	NC	AB	AB	BB	AB	AB	AB	AB	BB	AB	AA	AB	AB	AB	AA	BB	BB	AA	AA	AB	AB	AB	AB	AA	BB	AB	BB	AB	BB	AB	AA	NC	AB	AB	AA	AB	AA	AA	AB	BB	AB	AB	AA	AB	AA
chr1_2941366_G_T	1	2941366	TOP	[A/C]	AA	AA	AA	AA	AA	AA	AA	AA	AA	AA	AA	AA	AA	AA	AA	AA	AA	AA	AA	AA	AA	AA	AA	AA	AA	AA	AA	AA	AA	AA	AA	AA	AA	AA	AA	AA	AA	AA	AA	AA	AA	AA	AA	AA	AA
chr1_2992477_A_G	1	2992477	BOT	[T/C]	BB	BB	BB	BB	BB	BB	BB	BB	BB	BB	BB	BB	BB	BB	BB	BB	BB	BB	BB	BB	BB	BB	BB	BB	BB	BB	BB	BB	BB	BB	BB	BB	BB	BB	BB	BB	BB	BB	BB	BB	BB	BB	BB	BB	BB
chr1_3010321_A_C	1	3010321	TOP	[A/C]	NC	AB	AB	AA	AB	AB	AB	AB	AA	AB	BB	AB	AB	AB	BB	AA	AA	BB	BB	AB	AB	AB	AB	BB	AA	AB	AA	AB	AA	AB	BB	NC	AB	AB	BB	AB	BB	BB	AB	AA	AB	AB	BB	AB	BB
chr1_301596_A_G	1	301596	TOP	[A/G]	BB	BB	BB	BB	BB	BB	BB	BB	BB	BB	BB	BB	BB	BB	BB	BB	BB	BB	BB	BB	BB	BB	BB	BB	BB	BB	BB	BB	BB	BB	BB	NC	BB	BB	BB	BB	BB	BB	BB	BB	BB	BB	BB	BB	BB
chr1_3047360_C_T	1	3047360	BOT	[T/C]	BB	BB	BB	BB	BB	BB	BB	BB	BB	BB	BB	BB	BB	BB	BB	BB	BB	BB	BB	BB	BB	BB	BB	BB	BB	BB	BB	BB	BB	BB	BB	BB	BB	BB	BB	BB	BB	BB	BB	BB	BB	BB	BB	BB	BB
chr1_3081200_G_T	1	3081200	TOP	[A/C]	BB	BB	BB	BB	BB	BB	BB	BB	BB	BB	BB	BB	BB	BB	BB	BB	BB	BB	BB	BB	BB	BB	BB	BB	BB	BB	BB	BB	BB	BB	BB	BB	BB	BB	BB	BB	BB	BB	BB	BB	BB	BB	BB	BB	BB
Vvi_1196	1	3100779	BOT	[T/C]	BB	AB	AB	AA	AB	AB	AB	AB	AA	NC	BB	AB	AB	AB	BB	AA	AA	BB	BB	AB	AB	AB	AB	BB	AA	AB	AA	AB	AA	AB	BB	BB	AB	AB	BB	AB	BB	BB	AB	AA	AB	AB	BB	AB	BB
chr1_3120443_C_T	1	3120443	TOP	[A/G]	AA	AA	AA	AA	AA	AA	AA	AA	AA	AA	AA	AA	AA	AA	AA	AA	AA	AA	AA	AA	AA	AA	AA	AA	AA	AA	AA	AA	AA	AA	AA	AA	AA	AA	AA	AA	AA	AA	AA	AA	AA	AA	AA	AA	AA
chr1_3126878_A_C	1	3126878	BOT	[T/G]	BB	BB	BB	BB	BB	BB	BB	BB	BB	BB	BB	BB	BB	BB	BB	BB	BB	BB	BB	BB	BB	BB	BB	BB	BB	BB	BB	BB	BB	BB	BB	BB	BB	BB	BB	BB	BB	BB	BB	BB	BB	BB	BB	BB	BB
chr1_3145799_C_T	1	3145799	TOP	[A/G]	AA	AA	AA	AA	AA	AA	AA	AA	AA	AA	AA	AA	AA	AA	AA	AA	AA	AA	AA	AA	AA	AA	AA	AA	AA	AA	AA	AA	AA	AA	AA	AA	AA	AA	AA	AA	AA	AA	AA	AA	AA	AA	AA	AA	AA
chr1_3147694_C_T	1	3147694	BOT	[T/C]	BB	BB	BB	BB	BB	BB	BB	BB	BB	BB	BB	BB	BB	BB	BB	BB	BB	BB	BB	BB	BB	BB	BB	BB	BB	BB	BB	BB	BB	BB	BB	NC	BB	BB	BB	BB	BB	BB	BB	BB	BB	BB	BB	BB	BB
be_A_G_chr1_3169143	1	3169143	TOP	[A/G]	AA	AA	AA	NC	AA	AA	AA	AA	NC	AA	AA	AA	AA	AA	AA	NC	NC	AA	AA	AA	AA	AA	AA	AA	NC	AA	AA	AA	NC	AA	AA	AA	AA	AA	AA	AA	AA	AA	AA	NC	AA	AA	AA	AA	AA
lb_G_T_chr1_3174683	1	3174683	TOP	[A/C]	BB	BB	BB	BB	BB	BB	BB	BB	BB	BB	BB	BB	BB	BB	BB	BB	BB	BB	BB	BB	BB	BB	BB	BB	BB	BB	BB	BB	BB	BB	BB	BB	BB	BB	BB	BB	BB	BB	BB	BB	BB	BB	BB	BB	BB
ae_G_A_chr1_3183841	1	3183841	BOT	[T/C]	BB	BB	BB	BB	BB	BB	BB	BB	BB	BB	BB	BB	BB	BB	BB	BB	BB	BB	BB	BB	BB	BB	BB	BB	BB	BB	BB	BB	BB	BB	BB	BB	BB	BB	BB	BB	BB	BB	BB	BB	BB	BB	BB	BB	BB
cn_T_C_chr1_3184789	1	3184789	TOP	[A/G]	AA	AA	AA	AA	AA	AA	AA	AA	AA	AA	AA	AA	AA	AA	AA	AA	AA	AA	AA	AA	AA	AA	AA	AA	AA	AA	AA	AA	AA	AA	AA	AA	AA	AA	AA	AA	AA	AA	AA	AA	AA	AA	AA	AA	AA
chr1_3188815_A_C	1	3188815	BOT	[T/G]	AA	AA	AA	AA	AA	AA	AA	AA	AA	AA	AA	AA	AA	AA	AA	AA	AA	AA	AA	AA	AA	AA	AA	AA	AA	AA	AA	AA	AA	AA	AA	AA	AA	AA	AA	AA	AA	AA	AA	AA	AA	AA	AA	AA	AA
li_C_T_chr1_3208911	1	3208911	TOP	[A/G]	BB	BB	BB	BB	BB	BB	BB	BB	BB	BB	BB	BB	BB	BB	BB	BB	BB	BB	BB	BB	BB	BB	BB	BB	BB	BB	BB	BB	BB	BB	BB	BB	BB	BB	BB	BB	BB	BB	BB	BB	BB	BB	BB	BB	BB
chr1_3224471_A_G	1	3224471	BOT	[T/C]	BB	BB	BB	BB	BB	BB	BB	BB	BB	BB	BB	BB	BB	BB	BB	BB	BB	BB	BB	BB	BB	BB	BB	BB	BB	BB	BB	BB	BB	BB	BB	BB	BB	BB	BB	BB	BB	BB	BB	BB	BB	BB	BB	BB	BB
chr1_3306534_A_C	1	3306534	BOT	[T/G]	BB	AB	AB	AA	AB	AB	AB	AB	AA	AB	BB	AB	AB	BB	BB	AA	AA	BB	BB	AB	AB	AB	AB	BB	AA	AB	AA	AB	AA	AB	BB	NC	AB	AB	BB	AB	BB	BB	AB	AA	AB	AB	BB	AB	BB
chr1_3328583_A_C	1	3328583	TOP	[A/C]	BB	AB	AB	AA	AB	AB	AB	AB	AA	AB	BB	AB	AB	BB	BB	AA	AA	BB	BB	AB	AB	AB	AB	BB	AA	AB	AA	AB	AA	AB	BB	NC	AB	AB	BB	AB	BB	BB	AB	AA	AB	AB	BB	AB	BB
chr1_3373891_C_T	1	3373891	TOP	[A/G]	AA	AB	AB	BB	AB	AB	AB	AB	BB	AB	AA	AB	AB	AA	AA	BB	BB	AA	AA	AB	AB	AB	AB	AA	BB	AB	BB	AB	BB	AB	AA	NC	AB	AB	AA	AB	AA	AA	AB	BB	AB	AB	AA	AA	AA
chr1_3402236_A_G	1	3402236	BOT	[T/C]	AA	AA	AA	AA	AA	AA	AA	AA	AA	AA	AA	AA	AA	AA	AA	AA	AA	AA	AA	AA	AA	AA	AA	AA	AA	AA	AA	AA	AA	AA	AA	AA	AA	AA	AA	AA	AA	AA	AA	AA	AA	AA	AA	AA	AA
chr1_340893_C_T	1	340893	BOT	[T/C]	BB	BB	BB	BB	BB	BB	BB	BB	BB	BB	BB	BB	BB	BB	BB	BB	BB	BB	BB	BB	BB	BB	BB	BB	BB	BB	BB	BB	BB	BB	BB	BB	BB	BB	BB	BB	BB	BB	BB	BB	BB	BB	BB	BB	BB
chr1_3434841_A_G	1	3434841	TOP	[A/G]	AA	AA	AA	AA	AA	AA	AA	AA	AA	AA	AA	AA	AA	AA	AA	AA	AA	AA	AA	AA	AA	AA	AA	AA	AA	AA	AA	AA	AA	AA	AA	AA	AA	AA	AA	AA	AA	AA	AA	AA	AA	AA	AA	AA	AA
chr1_3451797_A_C	1	3451797	TOP	[A/C]	BB	BB	BB	BB	BB	BB	BB	BB	BB	BB	BB	BB	BB	BB	BB	BB	BB	BB	BB	BB	BB	BB	BB	BB	BB	BB	BB	BB	BB	BB	BB	BB	BB	BB	BB	BB	BB	BB	BB	BB	BB	BB	BB	BB	BB
mu_o_T_C_chr1_3452991	1	3452991	BOT	[T/C]	AA	AA	AA	AA	AA	AA	AA	AA	AA	AA	AA	AA	AA	AA	AA	AA	AA	AA	AA	AA	AA	AA	AA	AA	AA	AA	AA	AA	AA	AA	AA	AA	AA	AA	AA	AA	AA	AA	AA	AA	AA	AA	AA	AA	AA
chr1_3456810_A_G	1	3456810	TOP	[A/G]	BB	BB	BB	BB	BB	BB	BB	BB	BB	BB	BB	BB	BB	BB	BB	BB	BB	BB	BB	BB	BB	BB	BB	BB	BB	BB	BB	BB	BB	BB	BB	BB	BB	BB	BB	BB	BB	BB	BB	BB	BB	BB	BB	BB	BB
chr1_3477330_C_T	1	3477330	TOP	[A/G]	AA	AA	AA	AA	AA	AA	AA	AA	AA	AA	AA	AA	AA	AA	AA	AA	AA	AA	AA	AA	AA	AA	AA	AA	AA	AA	AA	AA	AA	AA	AA	AA	AA	AA	AA	AA	AA	AA	AA	AA	AA	AA	AA	AA	AA
chr1_3509301_A_C	1	3509301	TOP	[A/C]	BB	BB	BB	BB	BB	BB	BB	BB	BB	BB	BB	BB	BB	BB	BB	BB	BB	BB	BB	BB	BB	BB	BB	BB	BB	BB	BB	BB	BB	BB	BB	BB	BB	BB	BB	BB	BB	BB	BB	BB	BB	BB	BB	BB	BB
mu_o_C_T_chr1_3557391	1	3557391	TOP	[A/G]	BB	BB	BB	BB	BB	BB	BB	BB	BB	BB	BB	BB	BB	BB	BB	BB	BB	BB	BB	BB	BB	BB	BB	BB	BB	BB	BB	BB	BB	BB	BB	BB	BB	BB	BB	BB	BB	BB	BB	BB	BB	BB	BB	BB	BB
chr1_3581101_A_G	1	3581101	TOP	[A/G]	AA	AA	AA	AA	AA	AA	AA	AA	AA	AA	AA	AA	AA	AA	AA	AA	AA	AA	AA	AA	AA	AA	AA	AA	AA	AA	AA	AA	AA	AA	AA	AA	AA	AA	AA	AA	AA	AA	AA	AA	AA	AA	AA	AA	AA
chr1_3591346_A_G	1	3591346	BOT	[T/C]	BB	BB	BB	BB	BB	BB	BB	BB	BB	BB	BB	BB	BB	BB	BB	BB	BB	BB	BB	BB	BB	BB	BB	BB	BB	BB	BB	BB	BB	BB	BB	NC	BB	BB	BB	BB	BB	BB	BB	BB	BB	BB	BB	BB	BB
chr1_3631408_C_T	1	3631408	TOP	[A/G]	AA	AA	AA	AA	AA	AA	AA	AA	AA	AA	AA	AA	AA	AA	AA	AA	AA	AA	AA	AA	AA	AA	AA	AA	AA	AA	AA	AA	AA	AA	AA	AA	AA	AA	AA	AA	AA	AA	AA	AA	AA	AA	AA	AA	AA
mu_o_C_T_chr1_3652739	1	3652739	BOT	[T/C]	BB	BB	BB	BB	BB	BB	BB	BB	BB	BB	BB	BB	BB	BB	BB	BB	BB	BB	BB	BB	BB	BB	BB	BB	BB	BB	BB	BB	BB	BB	BB	BB	BB	BB	BB	BB	BB	BB	BB	BB	BB	BB	BB	BB	BB
chr1_3654499_A_G	1	3654499	TOP	[A/G]	AB	AB	AB	AA	AB	AB	AB	AB	AA	AB	BB	AB	AB	BB	BB	AA	AA	BB	BB	AB	AB	AB	AB	AB	AA	AB	AA	AB	AA	BB	BB	NC	AB	AB	BB	AB	BB	BB	AB	AA	AB	AB	BB	BB	BB
ae_A_G_chr1_3658518	1	3658518	TOP	[A/G]	AA	AA	AA	AA	AA	AA	AA	AA	AA	AA	AA	AA	AA	AA	AA	AA	AA	AA	AA	AA	AA	AA	AA	AA	AA	AA	AA	AA	AA	AA	AA	AA	AA	AA	AA	AA	AA	AA	AA	AA	AA	AA	AA	AA	AA
cn_A_C_chr1_3671441	1	3671441	TOP	[A/C]	AB	AB	AB	AA	AB	AB	AB	AB	AA	AB	BB	AB	AB	NC	BB	AA	AA	BB	BB	AB	AB	AB	AB	AB	AA	AB	AA	AB	AA	BB	BB	NC	AB	AB	BB	AB	BB	BB	AB	AA	AB	AB	BB	BB	BB
lb_C_T_chr1_3687262	1	3687262	TOP	[A/G]	AA	AA	AA	AA	AA	AA	AA	AA	AA	AA	AA	AA	AA	AA	AA	AA	AA	AA	AA	AA	AA	AA	AA	AA	AA	AA	AA	AA	AA	AA	AA	AA	AA	AA	AA	AA	AA	AA	AA	AA	AA	AA	AA	AA	AA
chr1_3691115_A_G	1	3691115	TOP	[A/G]	AA	AA	AA	AA	AA	AA	AA	AA	AA	AA	AA	AA	AA	AA	AA	AA	AA	AA	AA	AA	AA	AA	AA	AA	AA	AA	AA	AA	AA	AA	AA	AA	AA	AA	AA	AA	AA	AA	AA	AA	AA	AA	AA	AA	AA
chr1_3724132_A_C	1	3724132	BOT	[T/G]	AB	AB	AB	BB	AB	AB	AB	AB	BB	AB	AA	AB	AB	AA	AA	BB	BB	AB	AA	AB	AB	AB	AB	AB	BB	AB	BB	AB	BB	AA	AA	NC	AB	AB	AA	AB	AA	AA	AB	BB	AB	AB	AA	AA	AA
chr1_373564_A_G	1	373564	BOT	[T/C]	AA	AA	AA	AA	AA	AA	AA	AA	AA	AA	AA	AA	AA	AA	AA	AA	AA	AA	AA	AA	AA	AA	AA	AA	AA	AA	AA	AA	AA	AA	AA	AA	AA	AA	AA	AA	AA	AA	AA	AA	AA	AA	AA	AA	AA
chr1_3759142_C_T	1	3759142	TOP	[A/G]	AB	AB	AB	BB	AB	AB	AB	AB	BB	NC	AA	AB	AB	AA	AA	BB	BB	AB	AA	AB	AB	AB	AB	AB	BB	AB	BB	AB	BB	AA	AA	AA	AB	AB	AA	AB	AA	AA	AB	BB	AB	AB	AA	AA	AA
chr1_3774934_C_T	1	3774934	BOT	[T/C]	AA	AA	AA	AA	AA	AA	AA	AA	AA	AA	AA	AA	AA	AA	AA	AA	AA	AA	AA	AA	AA	AA	AA	AA	AA	AA	AA	AA	AA	AA	AA	AA	AA	AA	AA	AA	AA	AA	AA	AA	AA	AA	AA	AA	AA
mu_o_A_G_chr1_3782883	1	3782883	BOT	[T/C]	AA	AA	AA	AA	AA	AA	AA	AA	AA	AA	AA	AA	AA	AA	AA	AA	AA	AA	AA	AA	AA	AA	AA	AA	AA	AA	AA	AA	AA	AA	AA	AA	AA	AA	AA	AA	AA	AA	AA	AA	AA	AA	AA	AA	AA
chr1_3797506_C_T	1	3797506	TOP	[A/G]	AB	AB	AB	BB	AB	AB	AB	AB	BB	AB	AA	AB	AB	AA	AA	BB	BB	AB	AA	AB	AB	AB	AB	AB	BB	AB	BB	AB	BB	AA	AB	NC	AB	AB	AA	AB	AA	AA	AB	BB	AB	AB	AA	AA	AA
chr1_380881_A_G	1	380881	BOT	[T/C]	AA	AA	AA	AA	AA	AA	AA	AA	AA	AA	AA	AA	AA	AA	AA	AA	AA	AA	AA	AA	AA	AA	AA	AA	AA	AA	AA	AA	AA	AA	AA	AA	AA	AA	AA	AA	AA	AA	AA	AA	AA	AA	AA	AA	AA
chr1_3831340_A_G	1	3831340	BOT	[T/C]	AB	AB	AB	AA	AB	AB	AB	AB	AA	AB	BB	AB	AB	BB	BB	AA	AA	AB	BB	AB	AB	AB	AB	AB	AA	AB	AA	AB	AA	BB	AB	BB	AB	AB	BB	AB	BB	BB	AB	AA	AB	AB	BB	BB	BB
chr1_3859748_C_T	1	3859748	BOT	[T/C]	BB	BB	BB	BB	BB	BB	BB	BB	BB	BB	BB	BB	BB	BB	BB	BB	BB	BB	BB	BB	BB	BB	BB	BB	BB	BB	BB	BB	BB	BB	BB	BB	BB	BB	BB	BB	BB	BB	BB	BB	BB	BB	BB	BB	BB
chr1_3901308_C_T	1	3901308	BOT	[T/C]	BB	BB	BB	BB	BB	BB	BB	BB	BB	BB	BB	BB	BB	BB	BB	BB	BB	BB	BB	BB	BB	BB	BB	BB	BB	BB	BB	BB	BB	BB	BB	BB	BB	BB	BB	BB	BB	BB	BB	BB	BB	BB	BB	BB	BB
chr1_3912644_A_G	1	3912644	TOP	[A/G]	AB	AB	AB	BB	AB	AB	AB	AB	BB	AB	AA	AB	AB	AA	AA	BB	BB	AB	AA	AB	AB	AB	AB	AB	BB	AB	BB	AB	BB	AA	AB	NC	AB	AB	AA	AB	AA	AA	AB	BB	AB	AB	AA	AA	AA
chr1_3939437_C_T	1	3939437	TOP	[A/G]	BB	BB	BB	BB	BB	BB	BB	BB	BB	BB	BB	BB	BB	BB	BB	BB	BB	BB	BB	BB	BB	BB	BB	BB	BB	BB	BB	BB	BB	BB	BB	BB	BB	BB	BB	BB	BB	BB	BB	BB	BB	BB	BB	BB	BB
mu_s_A_G_chr1_3971191	1	3971191	TOP	[A/G]	AA	AA	AA	AA	AA	AA	AA	AA	AA	AA	AA	AA	AA	AA	AA	AA	AA	AA	AA	AA	AA	AA	AA	AA	AA	AA	AA	AA	AA	AA	AA	AA	AA	AA	AA	AA	AA	AA	AA	AA	AA	AA	AA	AA	AA
chr1_3973232_A_G	1	3973232	BOT	[T/C]	AB	AB	AB	AA	AB	AB	AB	AB	AA	AB	BB	AB	AB	BB	BB	AA	AA	AB	BB	AB	AB	AB	AB	AB	AA	AB	AA	AB	AA	BB	AB	NC	AB	AB	BB	AB	BB	BB	AB	AA	AB	AB	BB	BB	BB
chr1_4037365_A_C	1	4037365	BOT	[T/G]	AA	AA	AA	AA	AA	AA	AA	AA	AA	AA	AA	AA	AA	AA	AA	AA	AA	AA	AA	AA	AA	AA	AA	AA	AA	AA	AA	AA	AA	AA	AA	AA	AA	AA	AA	AA	AA	AA	AA	AA	AA	AA	AA	AA	AA
chr1_404955_C_T	1	404955	BOT	[T/C]	AA	AA	AA	AA	AA	AA	AA	AA	AA	AA	AA	AA	AA	AA	AA	AA	AA	AA	AA	AA	AA	AA	AA	AA	AA	AA	AA	AA	AA	AA	AA	AA	AA	AA	AA	AA	AA	AA	AA	AA	AA	AA	AA	AA	AA
chr1_4065334_C_T	1	4065334	BOT	[T/C]	AA	AA	AA	AA	AA	AA	AA	AA	AA	AA	AA	AA	AA	AA	AA	AA	AA	AA	AA	AA	AA	AA	AA	AA	AA	AA	AA	AA	AA	AA	AA	AA	AA	AA	AA	AA	AA	AA	AA	AA	AA	AA	AA	AA	AA
chr1_4080597_A_G	1	4080597	BOT	[T/C]	AA	AA	AA	AA	AA	AA	AA	AA	AA	AA	AA	AA	AA	AA	AA	AA	AA	AA	AA	AA	AA	AA	AA	AA	AA	AA	AA	AA	AA	AA	AA	AA	AA	AA	AA	AA	AA	AA	AA	AA	AA	AA	AA	AA	AA
cn_G_A_chr1_4112247	1	4112247	TOP	[A/G]	BB	BB	BB	BB	BB	BB	BB	BB	BB	BB	BB	BB	BB	BB	BB	BB	BB	BB	BB	BB	BB	BB	BB	BB	BB	BB	BB	BB	BB	BB	BB	BB	BB	BB	BB	BB	BB	BB	BB	BB	BB	BB	BB	BB	BB
chr1_4115621_A_C	1	4115621	TOP	[A/C]	BB	BB	BB	BB	BB	BB	BB	BB	BB	BB	BB	BB	BB	BB	BB	BB	BB	BB	BB	BB	BB	BB	BB	BB	BB	BB	BB	BB	BB	BB	BB	BB	BB	BB	BB	BB	BB	BB	BB	BB	BB	BB	BB	BB	BB
chr1_4115697_G_T	1	4115697	TOP	[A/C]	AA	AA	AA	AA	AA	AA	AA	AA	AA	AA	AA	AA	AA	AA	AA	AA	AA	AA	AA	AA	AA	AA	AA	AA	AA	AA	AA	AA	AA	AA	AA	AA	AA	AA	AA	AA	AA	AA	AA	AA	AA	AA	AA	AA	AA
chr1_4153036_C_T	1	4153036	BOT	[T/C]	BB	BB	BB	BB	BB	BB	BB	BB	BB	BB	BB	BB	BB	BB	BB	BB	BB	BB	BB	BB	BB	BB	BB	BB	BB	BB	BB	BB	BB	BB	BB	BB	BB	BB	BB	BB	BB	BB	BB	BB	BB	BB	BB	BB	BB
ae_C_A_chr1_4159276	1	4159276	TOP	[A/C]	BB	BB	BB	BB	BB	BB	BB	BB	BB	BB	BB	BB	BB	BB	BB	BB	BB	BB	BB	BB	BB	BB	BB	BB	BB	BB	BB	BB	BB	BB	BB	BB	BB	BB	BB	BB	BB	BB	BB	BB	BB	BB	BB	BB	BB
be_C_T_chr1_4169519	1	4169519	BOT	[T/C]	BB	BB	BB	BB	BB	BB	BB	BB	BB	BB	BB	BB	BB	BB	BB	BB	BB	BB	BB	BB	BB	BB	BB	BB	BB	BB	BB	BB	BB	BB	BB	BB	BB	BB	BB	BB	BB	BB	BB	BB	BB	BB	BB	BB	BB
chr1_4189252_C_T	1	4189252	BOT	[T/C]	AB	AB	AB	BB	AB	AB	AB	AB	BB	AB	AA	AB	AB	AA	AA	BB	BB	AB	AA	AB	AB	AB	AB	AB	BB	AB	BB	AB	BB	AA	AB	NC	AB	AB	AA	AB	AA	AA	AB	BB	AB	AB	AA	AA	AA
chr1_4216628_A_G	1	4216628	TOP	[A/G]	AA	AA	AA	AA	AA	AA	AA	AA	AA	AA	AA	AA	AA	AA	AA	AA	AA	AA	AA	AA	AA	AA	AA	AA	AA	AA	AA	AA	AA	AA	AA	AA	AA	AA	AA	AA	AA	AA	AA	AA	AA	AA	AA	AA	AA
chr1_4217401_A_G	1	4217401	TOP	[A/G]	BB	BB	BB	BB	BB	BB	BB	BB	BB	BB	BB	BB	BB	BB	BB	BB	BB	BB	BB	BB	BB	BB	BB	BB	BB	BB	BB	BB	BB	BB	BB	BB	BB	BB	BB	BB	BB	BB	BB	BB	BB	BB	BB	BB	BB
chr1_4244591_A_G	1	4244591	TOP	[A/G]	AB	AB	AB	BB	AB	AB	AB	AB	BB	AB	AA	AB	AB	NC	AA	BB	BB	AB	AA	AB	AB	AB	AB	AB	BB	AB	BB	AB	BB	AA	AB	AB	AB	AB	AA	AB	AA	AA	AB	BB	AB	AB	AA	AA	AA
chr1_4328972_G_T	1	4328972	BOT	[T/G]	AB	AB	AB	BB	AB	AB	AB	AB	BB	AB	AA	AB	AB	AA	AA	BB	AB	AB	AA	AB	AB	AB	AB	AB	BB	AB	BB	AB	BB	AA	AB	AB	AB	AB	AA	AB	AA	AA	AB	BB	AB	AB	AA	AA	AA
chr1_4363169_C_T	1	4363169	BOT	[T/C]	AB	AB	AB	AA	AB	AB	AB	AB	AA	AB	BB	AB	AB	BB	BB	AA	AB	AB	BB	AB	AB	AB	AB	AB	AA	AB	AA	AB	AA	BB	AB	NC	AB	AB	BB	AB	BB	BB	AB	AA	AB	AB	BB	BB	BB
chr1_4372397_G_T	1	4372397	TOP	[A/C]	BB	BB	BB	BB	BB	BB	BB	BB	BB	BB	BB	BB	BB	BB	BB	BB	BB	BB	BB	BB	BB	BB	BB	BB	BB	BB	BB	BB	BB	BB	BB	BB	BB	BB	BB	BB	BB	BB	BB	BB	BB	BB	BB	BB	BB
chr1_4450776_A_G	1	4450776	TOP	[A/G]	AA	AA	AA	AA	AA	AA	AA	AA	AA	AA	AA	AA	AA	AA	AA	AA	AA	AA	AA	AA	AA	AA	AA	AA	AA	AA	AA	AA	AA	AA	AA	AA	AA	AA	AA	AA	AA	AA	AA	AA	AA	AA	AA	AA	AA
chr1_4472344_C_T	1	4472344	BOT	[T/C]	AB	AB	AB	BB	AB	AB	AB	AB	BB	AB	AA	AB	AB	AA	AA	BB	AB	AB	AA	AB	AB	AB	AB	AB	BB	AB	BB	AB	BB	AA	AB	AA	AB	AB	AA	AB	AA	AA	AB	BB	AB	AB	AA	AA	AA
li_A_G_chr1_4473038	1	4473038	BOT	[T/C]	AA	AA	AA	AA	AA	AA	AA	AA	AA	AA	AA	AA	AA	AA	AA	AA	AA	AA	AA	AA	AA	AA	AA	AA	AA	AA	AA	AA	AA	AA	AA	AA	AA	AA	AA	AA	AA	AA	AA	AA	AA	AA	AA	AA	AA
chr1_4507532_C_T	1	4507532	BOT	[T/C]	AB	AB	AB	AA	AB	AB	AB	AB	AA	AB	BB	AB	AB	BB	BB	AA	AB	AB	BB	AB	AB	AB	AB	AB	AA	AB	AA	AB	AA	BB	AB	NC	AB	AB	BB	AB	BB	BB	AB	AA	AB	AB	BB	BB	BB
chr1_4542269_A_G	1	4542269	BOT	[T/C]	BB	BB	BB	BB	BB	BB	BB	BB	BB	BB	BB	BB	BB	BB	BB	BB	BB	BB	BB	BB	BB	BB	BB	BB	BB	BB	BB	BB	BB	BB	BB	BB	BB	BB	BB	BB	BB	BB	BB	BB	BB	BB	BB	BB	BB
chr1_4576447_A_G	1	4576447	TOP	[A/G]	AB	AB	AB	AA	AB	AB	AB	AB	AA	AB	BB	AB	AB	BB	BB	AA	AB	AB	BB	AB	AB	AB	AB	AB	AA	AB	AA	AB	AA	BB	AB	AB	AB	AB	BB	AB	BB	BB	AB	AA	AB	AB	BB	BB	BB
chr1_4613154_C_T	1	4613154	BOT	[T/C]	BB	BB	BB	BB	BB	BB	BB	BB	BB	BB	BB	BB	BB	BB	BB	BB	BB	BB	BB	BB	BB	BB	BB	BB	BB	BB	BB	BB	BB	BB	BB	BB	BB	BB	BB	BB	BB	BB	BB	BB	BB	BB	BB	BB	BB
be_G_A_chr1_4644161	1	4644161	TOP	[A/G]	BB	BB	BB	BB	BB	BB	BB	BB	BB	BB	BB	BB	BB	BB	BB	BB	BB	BB	BB	BB	BB	BB	BB	BB	BB	BB	BB	BB	BB	BB	BB	BB	BB	BB	BB	BB	BB	BB	BB	BB	BB	BB	BB	BB	BB
chr1_4651426_G_T	1	4651426	TOP	[A/C]	BB	BB	BB	BB	BB	BB	BB	BB	BB	BB	BB	BB	BB	BB	BB	BB	BB	BB	BB	BB	BB	BB	BB	BB	BB	BB	BB	BB	BB	BB	BB	BB	BB	BB	BB	BB	BB	BB	BB	BB	BB	BB	BB	BB	BB
ae_A_G_chr1_4654425	1	4654425	BOT	[T/C]	AA	AA	AA	AA	AA	AA	AA	AA	AA	AA	AA	AA	AA	AA	AA	AA	AA	AA	AA	AA	AA	AA	AA	AA	AA	AA	AA	AA	AA	AA	AA	AA	AA	AA	AA	AA	AA	AA	AA	AA	AA	AA	AA	AA	AA
lb_T_C_chr1_4657877	1	4657877	TOP	[A/G]	AA	AA	AA	AA	AA	AA	AA	AA	AA	AA	AA	AA	AA	AA	AA	AA	AA	AA	AA	AA	AA	AA	AA	AA	AA	AA	AA	AA	AA	AA	AA	AA	AA	AA	AA	AA	AA	AA	AA	AA	AA	AA	AA	AA	AA
chr1_4682493_G_T	1	4682493	TOP	[A/C]	AB	AB	AB	BB	AB	AB	AB	AB	BB	AB	AA	AB	AB	AA	AA	BB	AB	AB	AA	AB	AB	AB	AB	AB	BB	AB	BB	AB	BB	AA	AB	NC	AB	AB	AA	AB	AA	AA	AB	BB	AB	AB	AA	AA	AA
chr1_4720796_A_C	1	4720796	TOP	[A/C]	BB	BB	BB	BB	BB	BB	BB	BB	BB	BB	BB	BB	BB	BB	BB	BB	BB	BB	BB	BB	BB	BB	BB	BB	BB	BB	BB	BB	BB	BB	BB	BB	BB	BB	BB	BB	BB	BB	BB	BB	BB	BB	BB	BB	BB
chr1_4765587_C_T	1	4765587	BOT	[T/C]	BB	BB	BB	BB	BB	BB	BB	BB	BB	BB	BB	BB	BB	BB	BB	BB	BB	BB	BB	BB	BB	BB	BB	BB	BB	BB	BB	BB	BB	BB	BB	BB	BB	BB	BB	BB	BB	BB	BB	BB	BB	BB	BB	BB	BB
chr1_482242_A_G	1	482242	BOT	[T/C]	AA	AA	AA	AA	AA	AA	AA	AA	AA	AA	AA	AA	AA	AA	AA	AA	AA	AA	AA	AA	AA	AA	AA	AA	AA	AA	AA	AA	AA	AA	AA	AA	AA	AA	AA	AA	AA	AA	AA	AA	AA	AA	AA	AA	AA
cn_A_G_chr1_4837590	1	4837590	TOP	[A/G]	AA	AA	AA	AA	AA	AA	AA	AA	AA	AA	AA	AA	AA	AA	AA	AA	AA	AA	AA	AA	AA	AA	AA	AA	AA	AA	AA	AA	AA	AA	AA	AA	AA	AA	AA	AA	AA	AA	AA	AA	AA	AA	AA	AA	AA
chr1_4849070_C_T	1	4849070	BOT	[T/C]	AA	AA	AA	AA	AA	AA	AA	AA	AA	AA	AA	AA	AA	AA	AA	AA	AA	AA	AA	AA	AA	AA	AA	AA	AA	AA	AA	AA	AA	AA	AA	AA	AA	AA	AA	AA	AA	AA	AA	AA	AA	AA	AA	AA	AA
chr1_4899311_C_T	1	4899311	TOP	[A/G]	AA	AA	AA	AA	AA	AA	AA	AA	AA	AA	AA	AA	AA	AA	AA	AA	AA	AA	AA	AA	AA	AA	AA	AA	AA	AA	AA	AA	AA	AA	AA	AA	AA	AA	AA	AA	AA	AA	AA	AA	AA	AA	AA	AA	AA
chr1_4934163_C_T	1	4934163	BOT	[T/C]	AB	AB	AB	AA	AB	AB	AB	AB	AA	AB	BB	AB	AB	BB	BB	AA	AB	AB	BB	AB	AB	AB	AB	AB	AA	AB	AA	AB	AA	BB	AB	NC	AB	AB	BB	AB	BB	BB	AB	AA	AB	AB	BB	BB	BB
chr1_496453_C_T	1	496453	TOP	[A/G]	AA	AA	AA	AA	AA	AA	AA	AA	AA	AA	AA	AA	AA	AA	AA	AA	AA	AA	AA	AA	AA	AA	AA	AA	AA	AA	AA	AA	AA	AA	AA	AA	AA	AA	AA	AA	AA	AA	AA	AA	AA	AA	AA	AA	AA
chr1_4986870_C_T	1	4986870	TOP	[A/G]	BB	BB	BB	BB	BB	BB	BB	BB	BB	BB	BB	BB	BB	BB	BB	BB	BB	BB	BB	BB	BB	BB	BB	BB	BB	BB	BB	BB	BB	BB	BB	NC	BB	BB	BB	BB	BB	BB	BB	BB	BB	BB	BB	BB	BB
chr1_5060409_C_T	1	5060409	TOP	[A/G]	AB	AB	AB	BB	AB	AB	AB	AB	BB	AB	AA	AB	AB	AA	AA	BB	AB	AB	AA	AB	AB	AB	AB	AB	BB	AB	BB	AB	BB	AA	AB	NC	AB	AB	AA	AB	NC	AA	AB	BB	AB	AB	AA	AA	AA
chr1_5121140_G_T	1	5121140	BOT	[T/G]	AA	AA	AA	AA	AA	AA	AA	AA	AA	AA	AA	AA	AA	AA	AA	AA	AA	AA	AA	AA	AA	AA	AA	AA	AA	AA	AA	AA	AA	AA	AA	AA	AA	AA	AA	AA	AA	AA	AA	AA	AA	AA	AA	AA	AA
chr1_5140666_C_T	1	5140666	BOT	[T/C]	AB	AB	AB	AA	AB	AB	AB	AB	AA	AB	BB	AB	AB	BB	BB	AA	AB	AB	BB	AB	AB	AB	AB	AB	AA	AB	AA	AB	AA	BB	AB	NC	AB	AB	BB	AB	BB	BB	AB	AA	AB	AB	BB	BB	BB
lb_T_C_chr1_5141117	1	5141117	TOP	[A/G]	AA	AA	AA	AA	AA	AA	AA	AA	AA	AA	AA	AA	AA	AA	AA	AA	AA	AA	AA	AA	AA	AA	AA	AA	AA	AA	AA	AA	AA	AA	AA	AA	AA	AA	AA	AA	AA	AA	AA	AA	AA	AA	AA	AA	AA
ae_G_A_chr1_5144110	1	5144110	TOP	[A/G]	AA	AA	AA	AA	AA	AA	AA	AA	AA	AA	AA	AA	AA	AA	AA	AA	AA	AA	AA	AA	AA	AA	AA	AA	AA	AA	AA	AA	AA	AA	AA	AA	AA	AA	AA	AA	AA	AA	AA	AA	AA	AA	AA	AA	AA
chr1_5144587_A_G	1	5144587	TOP	[A/G]	AA	AA	AA	AA	AA	AA	AA	AA	AA	AA	AA	AA	AA	AA	AA	AA	AA	AA	AA	AA	AA	AA	AA	AA	AA	AA	AA	AA	AA	AA	AA	AA	AA	AA	AA	AA	AA	AA	AA	AA	AA	AA	AA	AA	AA
be_T_C_chr1_5172624	1	5172624	BOT	[T/C]	AA	AA	AA	AA	AA	AA	AA	AA	AA	AA	AA	AA	AA	AA	AA	AA	AA	AA	AA	AA	AA	AA	AA	AA	AA	AA	AA	AA	AA	AA	AA	AA	AA	AA	AA	AA	AA	AA	AA	AA	AA	AA	AA	AA	AA
chr1_518154_C_T	1	518154	BOT	[T/C]	BB	BB	BB	BB	BB	BB	BB	BB	BB	BB	BB	BB	BB	BB	BB	BB	BB	BB	BB	BB	BB	BB	BB	BB	BB	BB	BB	BB	BB	BB	BB	BB	BB	BB	BB	BB	BB	BB	BB	BB	BB	BB	BB	BB	BB
chr1_5183903_C_T	1	5183903	BOT	[T/C]	BB	BB	BB	BB	BB	BB	BB	BB	BB	BB	BB	BB	BB	BB	BB	BB	BB	BB	BB	BB	BB	BB	BB	BB	BB	BB	BB	BB	BB	BB	BB	BB	BB	BB	BB	BB	BB	BB	BB	BB	BB	BB	BB	BB	BB
cn_G_A_chr1_5189397	1	5189397	BOT	[T/C]	BB	BB	BB	BB	BB	BB	BB	BB	BB	BB	BB	BB	BB	BB	BB	BB	BB	BB	BB	BB	BB	BB	BB	BB	BB	BB	BB	BB	BB	BB	BB	BB	BB	BB	BB	BB	BB	BB	BB	BB	BB	BB	BB	BB	BB
chr1_5213775_C_T	1	5213775	BOT	[T/C]	AB	AB	AB	BB	AB	AB	AB	AB	BB	AB	AA	AB	AB	AA	AA	BB	AB	AB	AA	AB	AB	AB	AB	AB	BB	AB	BB	AB	BB	AA	AB	NC	AB	AB	AA	AB	AA	AA	AB	BB	AB	AB	AA	AA	AA
chr1_5255483_A_G	1	5255483	TOP	[A/G]	BB	BB	BB	BB	BB	BB	BB	BB	BB	BB	BB	BB	BB	BB	BB	BB	BB	BB	BB	BB	BB	BB	BB	BB	BB	BB	BB	BB	BB	BB	BB	BB	BB	BB	BB	BB	BB	BB	BB	BB	BB	BB	BB	BB	BB
chr1_5295802_C_T	1	5295802	BOT	[T/C]	BB	BB	BB	BB	BB	BB	BB	BB	BB	BB	BB	BB	BB	BB	BB	BB	BB	BB	BB	BB	BB	BB	BB	BB	BB	BB	BB	BB	BB	BB	BB	BB	BB	BB	BB	BB	BB	BB	BB	BB	BB	BB	BB	BB	BB
chr1_5325032_C_T	1	5325032	BOT	[T/C]	AA	AA	AA	AA	AA	AA	AA	AA	AA	AA	AA	AA	AA	AA	AA	AA	AA	AA	AA	AA	AA	AA	AA	AA	AA	AA	AA	AA	AA	AA	AA	AA	AA	AA	AA	AA	AA	AA	AA	AA	AA	AA	AA	AA	AA
chr1_53639_C_T	1	53639	TOP	[A/G]	AA	AA	AA	AA	AA	AA	AA	AA	AA	AA	AA	AA	AA	AA	AA	AA	AA	AA	AA	AA	AA	AA	AA	AA	AA	AA	AA	AA	AA	AA	AA	AA	AA	AA	AA	AA	AA	AA	AA	AA	AA	AA	AA	AA	AA
SNP1427_120	1	5368886	TOP	[A/G]	BB	BB	BB	BB	BB	BB	BB	BB	BB	BB	BB	BB	BB	BB	BB	BB	BB	BB	BB	BB	BB	BB	BB	BB	BB	BB	BB	BB	BB	BB	BB	BB	BB	BB	BB	BB	BB	BB	BB	BB	BB	BB	BB	BB	BB
chr1_5371051_C_T	1	5371051	BOT	[T/C]	BB	BB	BB	BB	BB	BB	BB	BB	BB	BB	BB	BB	BB	BB	BB	BB	BB	BB	BB	BB	BB	BB	BB	BB	BB	BB	BB	BB	BB	BB	BB	BB	BB	BB	BB	BB	BB	BB	BB	BB	BB	BB	BB	BB	BB
chr1_5399768_C_T	1	5399768	BOT	[T/C]	AA	AA	AA	AA	AA	AA	AA	AA	AA	AA	AA	AA	AA	AA	AA	AA	AA	AA	AA	AA	AA	AA	AA	AA	AA	AA	AA	AA	AA	AA	AA	AA	AA	AA	AA	AA	AA	AA	AA	AA	AA	AA	AA	AA	AA
chr1_5423772_A_G	1	5423772	TOP	[A/G]	BB	BB	BB	BB	BB	BB	BB	BB	BB	BB	BB	BB	BB	BB	BB	BB	BB	BB	BB	BB	BB	BB	BB	BB	BB	BB	BB	BB	BB	BB	BB	BB	BB	BB	BB	BB	BB	BB	BB	BB	BB	BB	BB	BB	BB
chr1_542829_A_C	1	542829	TOP	[A/C]	BB	BB	BB	BB	BB	BB	BB	BB	BB	BB	BB	BB	BB	BB	BB	BB	BB	BB	BB	BB	BB	BB	BB	BB	BB	BB	BB	BB	BB	BB	BB	BB	BB	BB	BB	BB	BB	BB	BB	BB	BB	BB	BB	BB	BB
chr1_5433796_C_T	1	5433796	TOP	[A/G]	AB	AB	AB	AA	AB	AB	AB	AB	AA	AB	BB	AB	AB	BB	BB	AA	AB	AB	BB	AB	AB	AB	AB	AB	AA	AB	AA	AB	AA	BB	AB	NC	AB	AB	BB	AB	BB	BB	AB	AA	AB	AB	BB	BB	BB
chr1_5447426_C_T	1	5447426	TOP	[A/G]	BB	BB	BB	BB	BB	BB	BB	BB	BB	BB	BB	BB	BB	BB	BB	BB	BB	BB	BB	BB	BB	BB	BB	BB	BB	BB	BB	BB	BB	BB	BB	BB	BB	BB	BB	BB	BB	BB	BB	BB	BB	BB	BB	BB	BB
chr1_551026_A_G	1	551026	TOP	[A/G]	AA	AA	AA	AA	AA	AA	AA	AA	AA	AA	AA	AA	AA	AA	AA	AA	AA	AA	AA	AA	AA	AA	AA	AA	AA	AA	AA	AA	AA	AA	AA	AA	AA	AA	AA	AA	AA	AA	AA	AA	AA	AA	AA	AA	AA
chr1_5540305_A_G	1	5540305	BOT	[T/C]	BB	BB	BB	BB	BB	BB	BB	BB	BB	BB	BB	BB	BB	BB	BB	BB	BB	BB	BB	BB	BB	BB	BB	BB	BB	BB	BB	BB	BB	BB	BB	BB	BB	BB	BB	BB	BB	BB	BB	BB	BB	BB	BB	BB	BB
chr1_5577208_C_T	1	5577208	BOT	[T/C]	BB	BB	BB	BB	BB	BB	BB	BB	BB	BB	BB	BB	BB	BB	BB	BB	BB	BB	BB	BB	BB	BB	BB	BB	BB	BB	BB	BB	BB	BB	BB	BB	BB	BB	BB	BB	BB	BB	BB	BB	BB	BB	BB	BB	BB
mu_s_G_A_chr1_5600327	1	5600327	BOT	[T/C]	BB	BB	BB	BB	BB	BB	BB	BB	BB	BB	BB	BB	BB	BB	BB	BB	BB	BB	BB	BB	BB	BB	BB	BB	BB	BB	BB	BB	BB	BB	BB	BB	BB	BB	BB	BB	BB	BB	BB	BB	BB	BB	BB	BB	BB
chr1_5612001_G_T	1	5612001	TOP	[A/C]	AB	AB	AB	BB	AB	AB	AB	AB	BB	AB	AA	AB	AB	AA	AA	BB	AB	AB	AA	AB	AB	AB	AB	AB	BB	AB	BB	AB	BB	AA	AB	NC	AB	AB	AA	AB	AA	AA	AB	BB	AB	AB	AA	AA	AA
ae_A_G_chr1_5617181	1	5617181	TOP	[A/G]	AB	AB	AB	AA	AB	AB	AB	AB	AA	AB	BB	AB	AB	BB	BB	AA	AB	AB	BB	AB	AB	AB	AB	AB	AA	AB	AA	AB	AA	BB	AB	NC	AB	AB	BB	AB	BB	BB	AB	AA	AB	AB	BB	BB	BB
cn_T_C_chr1_5633809	1	5633809	TOP	[A/G]	AB	AB	AB	AA	AB	AB	AB	AB	AA	AB	BB	AB	AB	BB	BB	AA	AB	AB	BB	AB	AB	AB	AB	AB	AA	AB	AA	AB	AA	BB	AB	NC	AB	AB	BB	AB	BB	BB	AB	AA	AB	AB	BB	BB	BB
lb_T_C_chr1_5634775	1	5634775	BOT	[T/C]	AA	AA	AA	AA	AA	AA	AA	AA	AA	AA	AA	AA	AA	AA	AA	AA	AA	AA	AA	AA	AA	AA	AA	AA	AA	AA	AA	AA	AA	AA	AA	AA	AA	AA	AA	AA	AA	AA	AA	AA	AA	AA	AA	AA	AA
chr1_5720872_A_G	1	5720872	TOP	[A/G]	BB	BB	BB	BB	BB	BB	BB	BB	BB	BB	BB	BB	BB	BB	BB	BB	BB	BB	BB	BB	BB	BB	BB	BB	BB	BB	BB	BB	BB	BB	BB	BB	BB	BB	BB	BB	BB	BB	BB	BB	BB	BB	BB	BB	BB
li_C_T_chr1_5753959	1	5753959	BOT	[T/C]	BB	BB	BB	BB	BB	BB	BB	BB	BB	BB	BB	BB	BB	BB	BB	BB	BB	BB	BB	BB	BB	BB	BB	BB	BB	BB	BB	BB	BB	BB	BB	BB	BB	BB	BB	BB	BB	BB	BB	BB	BB	BB	BB	BB	BB
chr1_5754629_C_T	1	5754629	TOP	[A/G]	AB	AB	AB	BB	AB	AB	AB	AB	BB	AB	AA	AB	AB	AA	AA	BB	AB	AB	AA	AB	AB	AB	AB	AB	BB	AB	BB	AB	BB	AA	AB	NC	AB	AB	AA	AB	AA	AA	AB	BB	AB	AB	AA	AA	AA
chr1_5755006_A_G	1	5755006	TOP	[A/G]	AA	AA	AA	AA	AA	AA	AA	AA	AA	AA	AA	AA	AA	AA	AA	AA	AA	AA	AA	AA	AA	AA	AA	AA	AA	AA	AA	AA	AA	AA	AA	AA	AA	AA	AA	AA	AA	AA	AA	AA	AA	AA	AA	AA	AA
chr1_5862174_C_T	1	5862174	BOT	[T/C]	AA	AA	AA	AA	AA	AA	AA	AA	AA	AA	AA	AA	AA	AA	AA	AA	AA	AA	AA	AA	AA	AA	AA	AA	AA	AA	AA	AA	AA	AA	AA	AA	AA	AA	AA	AA	AA	AA	AA	AA	AA	AA	AA	AA	AA
mu_o_A_G_chr1_5878739	1	5878739	TOP	[A/G]	AA	AA	AA	AA	AA	AA	AA	AA	AA	AA	AA	AA	AA	AA	AA	AA	AA	AA	AA	AA	AA	AA	AA	AA	AA	AA	AA	AA	AA	AA	AA	AA	AA	AA	AA	AA	AA	AA	AA	AA	AA	AA	AA	AA	AA
chr1_5898296_A_G	1	5898296	BOT	[T/C]	BB	BB	BB	BB	BB	BB	BB	BB	BB	BB	BB	BB	BB	BB	BB	BB	BB	BB	BB	BB	BB	BB	BB	BB	BB	BB	BB	BB	BB	BB	BB	BB	BB	BB	BB	BB	BB	BB	BB	BB	BB	BB	BB	BB	BB
chr1_5906790_A_C	1	5906790	TOP	[A/C]	BB	BB	BB	BB	BB	BB	BB	BB	BB	BB	BB	BB	BB	BB	BB	BB	BB	BB	BB	BB	BB	BB	BB	BB	BB	BB	BB	BB	BB	BB	BB	BB	BB	BB	BB	BB	BB	BB	BB	BB	BB	BB	BB	BB	BB
chr1_5973457_C_T	1	5973457	BOT	[T/C]	AB	AB	AB	AA	AB	AB	AB	AB	AA	AB	BB	AB	AB	BB	AB	AA	AB	AB	BB	AB	AB	AB	AB	AB	AA	AB	AA	AB	AA	BB	AB	BB	AB	AB	BB	AB	BB	BB	AB	AA	AB	AB	BB	BB	BB
chr1_6004042_A_G	1	6004042	BOT	[T/C]	AB	AB	AB	BB	AB	AB	AB	AB	BB	AB	AA	AB	AB	NC	AB	BB	AB	AB	AA	AB	AB	AB	AB	AB	BB	AB	BB	AB	BB	AA	AB	NC	AB	AB	AA	AB	AA	AA	AB	BB	AB	AB	AA	AA	AA
chr1_6062580_G_T	1	6062580	BOT	[T/G]	AA	AA	AA	AA	AA	AA	AA	AA	AA	AA	AA	AA	AA	AA	AA	AA	AA	AA	AA	AA	AA	AA	AA	AA	AA	AA	AA	AA	AA	AA	AA	AA	AA	AA	AA	AA	AA	AA	AA	AA	AA	AA	AA	AA	AA
chr1_6074809_G_T	1	6074809	BOT	[T/G]	AA	AA	AA	AA	AA	AA	AA	AA	AA	AA	AA	AA	AA	AA	AA	AA	AA	AA	AA	AA	AA	AA	AA	AA	AA	AA	AA	AA	AA	AA	AA	AA	AA	AA	AA	AA	AA	AA	AA	AA	AA	AA	AA	AA	AA
chr1_6083020_A_C	1	6083020	TOP	[A/C]	AA	AA	AA	AA	AA	AA	AA	AA	AA	AA	AA	AA	AA	AA	AA	AA	AA	AA	AA	AA	AA	AA	AA	AA	AA	AA	AA	AA	AA	AA	AA	AA	AA	AA	AA	AA	AA	AA	AA	AA	AA	AA	AA	AA	AA
chr1_6109262_A_G	1	6109262	TOP	[A/G]	AA	AA	AA	AA	AA	AA	AA	AA	AA	AA	AA	AA	AA	AA	AA	AA	AA	AA	AA	AA	AA	AA	AA	AA	AA	AA	AA	AA	AA	AA	AA	AA	AA	AA	AA	AA	AA	AA	AA	AA	AA	AA	AA	AA	AA
cn_T_G_chr1_6117883	1	6117883	BOT	[T/G]	AA	AA	AA	AA	AA	AA	AA	AA	AA	AA	AA	AA	AA	AA	AA	AA	AA	AA	AA	AA	AA	AA	AA	AA	AA	AA	AA	AA	AA	AA	AA	AA	AA	AA	AA	AA	AA	AA	AA	AA	AA	AA	AA	AA	AA
mu_o_C_T_chr1_6118771	1	6118771	BOT	[T/C]	BB	BB	BB	BB	BB	BB	BB	BB	BB	BB	BB	BB	BB	BB	BB	BB	BB	BB	BB	BB	BB	BB	BB	BB	BB	BB	BB	BB	BB	BB	BB	BB	BB	BB	BB	BB	BB	BB	BB	BB	BB	BB	BB	BB	BB
chr1_61191_C_T	1	61191	BOT	[T/C]	BB	BB	BB	BB	BB	BB	BB	BB	BB	BB	BB	BB	BB	BB	BB	BB	BB	BB	BB	BB	BB	BB	BB	BB	BB	BB	BB	BB	BB	BB	BB	BB	BB	BB	BB	BB	BB	BB	BB	BB	BB	BB	BB	BB	BB
be_C_T_chr1_6124236	1	6124236	TOP	[A/G]	BB	BB	BB	BB	BB	BB	BB	BB	BB	BB	BB	BB	BB	BB	BB	BB	BB	BB	BB	BB	BB	BB	BB	BB	BB	BB	BB	BB	BB	BB	BB	BB	BB	BB	BB	BB	BB	BB	BB	BB	BB	BB	BB	BB	BB
lb_T_C_chr1_6125440	1	6125440	TOP	[A/G]	AA	AA	AA	AA	AA	AA	AA	AA	AA	AA	AA	AA	AA	AA	AA	AA	AA	AA	AA	AA	AA	AA	AA	AA	AA	AA	AA	AA	AA	AA	AA	AA	AA	AA	AA	AA	AA	AA	AA	AA	AA	AA	AA	AA	AA
ae_T_C_chr1_6131884	1	6131884	TOP	[A/G]	AA	AA	AA	AA	AA	AA	AA	AA	AA	AA	AA	AA	AA	AA	AA	AA	AA	AA	AA	AA	AA	AA	AA	AA	AA	AA	AA	AA	AA	AA	AA	AA	AA	AA	AA	AA	AA	AA	AA	AA	AA	AA	AA	AA	AA
chr1_6142886_C_T	1	6142886	BOT	[T/C]	AB	AB	AB	BB	AB	AB	AB	AB	BB	AB	AA	AB	AB	AA	AB	BB	AB	AB	AA	AB	AB	AB	AB	AB	BB	AB	BB	AB	BB	AA	AB	AA	AB	AB	AA	AB	AA	AA	AB	BB	AB	AB	AA	AA	AA
li_T_C_chr1_618929	1	618929	BOT	[T/C]	AA	AA	AA	AA	AA	AA	AA	AA	AA	AA	AA	AA	AA	AA	AA	AA	AA	AA	AA	AA	AA	AA	AA	AA	AA	AA	AA	AA	AA	AA	AA	AA	AA	AA	AA	AA	AA	AA	AA	AA	AA	AA	AA	AA	AA
chr1_6214249_A_G	1	6214249	BOT	[T/C]	BB	BB	BB	BB	BB	BB	BB	BB	BB	BB	BB	BB	BB	BB	BB	BB	BB	BB	BB	BB	BB	BB	BB	BB	BB	BB	BB	BB	BB	BB	BB	BB	BB	BB	BB	BB	BB	BB	BB	BB	BB	BB	BB	BB	BB
chr1_6218393_C_T	1	6218393	BOT	[T/C]	AA	AA	AA	AA	AA	AA	AA	AA	AA	AA	AA	AA	AA	AA	AA	AA	AA	AA	AA	AA	AA	AA	AA	AA	AA	AA	AA	AA	AA	AA	AA	AA	AA	AA	AA	AA	AA	AA	AA	AA	AA	AA	AA	AA	AA
chr1_6298545_A_G	1	6298545	TOP	[A/G]	AB	AB	AB	AA	AB	AB	AB	AB	AB	AB	BB	AB	AB	BB	AB	AA	AB	AB	BB	AB	AB	AB	AB	AB	AA	AB	AA	AB	AA	BB	AB	NC	AB	AB	BB	AB	BB	BB	AB	AA	AB	AB	BB	BB	BB
chr1_6322315_A_G	1	6322315	BOT	[T/C]	AB	AB	AB	AA	AB	AB	AB	AB	AB	AB	BB	AB	AB	BB	AB	AA	AB	AB	BB	AB	AB	AB	AB	AB	AA	AB	AA	AB	AA	BB	AB	NC	AB	AB	BB	AB	BB	BB	AB	AA	AB	AB	BB	BB	BB
chr1_6359505_A_C	1	6359505	TOP	[A/C]	AA	AA	AA	AA	AA	AA	AA	AA	AA	AA	AA	AA	AA	AA	AA	AA	AA	AA	AA	AA	AA	AA	AA	AA	AA	AA	AA	AA	AA	AA	AA	AA	AA	AA	AA	AA	AA	AA	AA	AA	AA	AA	AA	AA	AA
chr1_6366603_A_G	1	6366603	BOT	[T/C]	AB	AB	AB	AA	AB	AB	AB	AB	AB	AB	BB	AB	AB	BB	AB	AA	AB	AB	BB	AB	AB	AB	AB	AB	AA	AB	AA	AB	AA	BB	AB	NC	AB	AB	BB	AB	BB	BB	AB	AA	AB	AB	BB	BB	BB
chr1_6394661_A_C	1	6394661	TOP	[A/C]	BB	BB	BB	BB	BB	BB	BB	BB	BB	BB	BB	BB	BB	BB	BB	BB	BB	BB	BB	BB	BB	BB	BB	BB	BB	BB	BB	BB	BB	BB	BB	BB	BB	BB	BB	BB	BB	BB	BB	BB	BB	BB	BB	BB	BB
chr1_6416049_A_G	1	6416049	TOP	[A/G]	AA	AA	AA	AA	AA	AA	AA	AA	AA	AA	AA	AA	AA	AA	AA	AA	AA	AA	AA	AA	AA	AA	AA	AA	AA	AA	AA	AA	AA	AA	AA	AA	AA	AA	AA	AA	AA	AA	AA	AA	AA	AA	AA	AA	AA
chr1_6433498_C_T	1	6433498	BOT	[T/C]	AA	AA	AA	AA	AA	AA	AA	AA	AA	AA	AA	AA	AA	AA	AA	AA	AA	AA	AA	AA	AA	AA	AA	AA	AA	AA	AA	AA	AA	AA	AA	AA	AA	AA	AA	AA	AA	AA	AA	AA	AA	AA	AA	AA	AA
chr1_6466156_A_C	1	6466156	TOP	[A/C]	AB	AB	AB	AA	AB	AB	AB	AB	AB	AB	BB	AB	AB	BB	AB	AA	AB	AB	BB	AB	AB	AB	AB	AB	AA	AB	AA	AB	AA	BB	AB	NC	AB	AB	BB	AB	BB	BB	AB	AA	AB	AB	BB	BB	BB
chr1_658493_A_G	1	658493	BOT	[T/C]	BB	BB	BB	AA	AB	AB	AA	AB	AA	AB	BB	AB	AB	AB	BB	AA	AA	BB	BB	AB	AB	AB	BB	BB	AA	AB	AA	AB	AA	AB	BB	BB	AB	AB	AB	AB	AB	BB	AB	AB	AB	AB	AB	AB	BB
chr1_6612179_A_G	1	6612179	TOP	[A/G]	AB	AB	BB	BB	AB	AB	AB	AB	AB	AB	AA	AB	AB	AA	AB	BB	AB	AB	AA	AB	AB	AB	AB	AB	BB	AB	BB	AB	BB	AA	AB	NC	AB	AB	AA	AB	AA	AA	AB	BB	AB	AB	AA	AA	AA
cn_T_C_chr1_6615339	1	6615339	BOT	[T/C]	AA	AA	AA	AA	AA	AA	AA	AA	AA	AA	AA	AA	AA	AA	AA	AA	AA	AA	AA	AA	AA	AA	AA	AA	AA	AA	AA	AA	AA	AA	AA	AA	AA	AA	AA	AA	AA	AA	AA	AA	AA	AA	AA	AA	AA
be_C_T_chr1_6617103	1	6617103	BOT	[T/C]	AB	AB	BB	BB	AB	AB	AB	AB	AB	AB	AA	AB	AB	AA	AB	BB	AB	AB	AA	AB	AB	AB	AB	AB	BB	AB	BB	AB	BB	AA	AB	NC	AB	AB	AA	AB	AA	AA	AB	BB	AB	AB	AA	AA	AA
lb_A_G_chr1_6623145	1	6623145	TOP	[A/G]	AA	AA	AA	AA	AA	AA	AA	AA	AA	AA	AA	AA	AA	AA	AA	AA	AA	AA	AA	AA	AA	AA	AA	AA	AA	AA	AA	AA	AA	AA	AA	AA	AA	AA	AA	AA	AA	AA	AA	AA	AA	AA	AA	AA	AA
chr1_6673914_C_T	1	6673914	BOT	[T/C]	BB	BB	BB	BB	BB	BB	BB	BB	BB	BB	BB	BB	BB	BB	BB	BB	BB	BB	BB	BB	BB	BB	BB	BB	BB	BB	BB	BB	BB	BB	BB	NC	BB	BB	BB	BB	BB	BB	BB	BB	BB	BB	BB	BB	BB
chr1_6681414_C_T	1	6681414	BOT	[T/C]	AB	AB	BB	BB	AB	AB	AB	BB	AB	AB	AA	AB	AB	AA	AB	BB	AB	AB	AA	AB	AB	AB	AB	AB	BB	AB	BB	AB	BB	AA	AB	NC	AB	AB	AA	AB	AA	AA	AB	BB	AB	AB	AA	AA	AA
chr1_6715047_A_G	1	6715047	BOT	[T/C]	AB	AB	AA	AA	AB	AB	AB	AA	AB	AB	BB	AB	AB	BB	AB	AA	AB	AB	BB	AB	AB	AB	AB	AB	AA	AB	AA	AB	AA	BB	AB	NC	AB	AB	BB	AB	BB	BB	AB	AA	AB	AB	BB	BB	BB
chr1_6737530_A_G	1	6737530	BOT	[T/C]	BB	BB	BB	BB	BB	BB	BB	BB	BB	BB	BB	BB	BB	BB	BB	BB	BB	BB	BB	BB	BB	BB	BB	BB	BB	BB	BB	BB	BB	BB	BB	BB	BB	BB	BB	BB	BB	BB	BB	BB	BB	BB	BB	BB	BB
chr1_6751978_A_G	1	6751978	TOP	[A/G]	AB	AB	BB	BB	AB	AB	AB	BB	AB	AB	AA	AB	AB	AA	AB	BB	AB	AB	AA	AB	AB	AB	AB	AB	BB	AB	BB	AB	BB	AA	AB	NC	AB	AB	AA	AB	AA	AA	AB	BB	AB	AB	AA	AA	AA
chr1_6787182_C_T	1	6787182	TOP	[A/G]	BB	BB	BB	BB	BB	BB	BB	BB	BB	BB	BB	BB	BB	BB	BB	BB	BB	BB	BB	BB	BB	BB	BB	BB	BB	BB	BB	BB	BB	BB	BB	BB	BB	BB	BB	BB	BB	BB	BB	BB	BB	BB	BB	BB	BB
chr1_6829041_A_G	1	6829041	TOP	[A/G]	AA	AA	AA	AA	AA	AA	AA	AA	AA	AA	AA	AA	AA	AA	AA	AA	AA	AA	AA	AA	AA	AA	AA	AA	AA	AA	AA	AA	AA	AA	AA	AA	AA	AA	AA	AA	AA	AA	AA	AA	AA	AA	AA	AA	AA
mu_s_C_T_chr1_6834635	1	6834635	TOP	[A/G]	BB	BB	BB	BB	BB	BB	BB	BB	BB	BB	BB	BB	BB	BB	BB	BB	BB	BB	BB	BB	BB	BB	BB	BB	BB	BB	BB	BB	BB	BB	BB	BB	BB	BB	BB	BB	BB	BB	BB	BB	BB	BB	BB	BB	BB
chr1_6864170_C_T	1	6864170	BOT	[T/C]	AA	AA	AA	AA	AA	AA	AA	AA	AA	AA	AA	AA	AA	AA	AA	AA	AA	AA	AA	AA	AA	AA	AA	AA	AA	AA	AA	AA	AA	AA	AA	AA	AA	AA	AA	AA	AA	AA	AA	AA	AA	AA	AA	AA	AA
SNP1517_271	1	6902301	TOP	[A/C]	AB	AB	BB	BB	AB	AB	AA	BB	AB	AB	AA	AB	AB	AA	AB	BB	AB	AB	AA	AB	AB	AB	AB	AB	BB	AB	BB	AB	BB	AA	AB	NC	AB	AB	AA	AB	AA	AA	AB	BB	AB	AB	AA	AA	AA
chr1_690894_G_T	1	690894	BOT	[T/G]	BB	BB	BB	AA	AB	AB	AA	AB	AA	AB	BB	AB	AB	AB	BB	AA	AA	BB	BB	AB	AB	AB	BB	BB	AA	AB	AA	AB	AA	AB	BB	BB	AB	AB	AB	AB	AB	BB	AB	AB	AB	AB	AB	AB	BB
chr1_6966305_C_T	1	6966305	TOP	[A/G]	AA	AA	AA	AA	AA	AA	AA	AA	AA	AA	AA	AA	AA	AA	AA	AA	AA	AA	AA	AA	AA	AA	AA	AA	AA	AA	AA	AA	AA	AA	AA	AA	AA	AA	AA	AA	AA	AA	AA	AA	AA	AA	AA	AA	AA
chr1_6982438_A_G	1	6982438	BOT	[T/C]	BB	BB	BB	BB	BB	BB	BB	BB	BB	BB	BB	BB	BB	BB	BB	BB	BB	BB	BB	BB	BB	BB	BB	BB	BB	BB	BB	BB	BB	BB	BB	BB	BB	BB	BB	BB	BB	BB	BB	BB	BB	BB	BB	BB	BB
chr1_6994761_A_G	1	6994761	TOP	[A/G]	BB	BB	BB	BB	BB	BB	BB	BB	BB	BB	BB	BB	BB	BB	BB	BB	BB	BB	BB	BB	BB	BB	BB	BB	BB	BB	BB	BB	BB	BB	BB	BB	BB	BB	BB	BB	BB	BB	BB	BB	BB	BB	BB	BB	BB
li_A_G_chr1_7041778	1	7041778	BOT	[T/C]	AA	AA	AA	AA	AA	AA	AA	AA	AA	AA	AA	AA	AA	AA	AA	AA	AA	AA	AA	AA	AA	AA	AA	AA	AA	AA	AA	AA	AA	AA	AA	AA	AA	AA	AA	AA	AA	AA	AA	AA	AA	AA	AA	AA	AA
chr1_7082544_A_G	1	7082544	BOT	[T/C]	AB	AB	BB	BB	AB	AB	AA	BB	AB	AB	AA	AB	AB	AA	AB	BB	AB	AB	AA	AB	AB	AB	AB	AB	BB	AB	BB	AB	BB	AA	AB	NC	AB	AB	AA	AB	AA	AA	AB	BB	AB	AB	AA	AA	AA
cn_T_C_chr1_7100593	1	7100593	BOT	[T/C]	AA	AA	AA	AA	AA	AA	AA	AA	AA	AA	AA	AA	AA	AA	AA	AA	AA	AA	AA	AA	AA	AA	AA	AA	AA	AA	AA	AA	AA	AA	AA	AA	AA	AA	AA	AA	AA	AA	AA	AA	AA	AA	AA	AA	AA
chr1_7108686_A_C	1	7108686	TOP	[A/C]	AA	AA	AA	AA	AA	AA	AA	AA	AA	AA	AA	AA	AA	AA	AA	AA	AA	AA	AA	AA	AA	AA	AA	AA	AA	AA	AA	AA	AA	AA	AA	AA	AA	AA	AA	AA	AA	AA	AA	AA	AA	AA	AA	AA	AA
ae_C_T_chr1_7112638	1	7112638	BOT	[T/C]	BB	BB	BB	BB	BB	BB	BB	BB	BB	BB	BB	BB	BB	BB	BB	BB	BB	BB	BB	BB	BB	BB	BB	BB	BB	BB	BB	BB	BB	BB	BB	BB	BB	BB	BB	BB	BB	BB	BB	BB	BB	BB	BB	BB	BB
lb_T_G_chr1_7130173	1	7130173	TOP	[A/C]	AA	AA	AA	AA	AA	AA	AA	AA	AA	AA	AA	AA	AA	AA	AA	AA	AA	AA	AA	AA	AA	AA	AA	AA	AA	AA	AA	AA	AA	AA	AA	AA	AA	AA	AA	AA	AA	AA	AA	AA	AA	AA	AA	AA	AA
chr1_7135890_A_G	1	7135890	TOP	[A/G]	AA	AA	AA	AA	AA	AA	AA	AA	AA	AA	AA	AA	AA	AA	AA	AA	AA	AA	AA	AA	AA	AA	AA	AA	AA	AA	AA	AA	AA	AA	AA	AA	AA	AA	AA	AA	AA	AA	AA	AA	AA	AA	AA	AA	AA
chr1_7146078_C_T	1	7146078	TOP	[A/G]	BB	BB	BB	BB	BB	BB	BB	BB	BB	BB	BB	BB	BB	BB	BB	BB	BB	BB	BB	BB	BB	BB	BB	BB	BB	BB	BB	BB	BB	BB	BB	BB	BB	BB	BB	BB	BB	BB	BB	BB	BB	BB	BB	BB	BB
be_G_A_chr1_7159740	1	7159740	TOP	[A/G]	BB	BB	BB	BB	BB	BB	BB	BB	BB	BB	BB	BB	BB	BB	BB	BB	BB	BB	BB	BB	BB	BB	BB	BB	BB	BB	BB	BB	BB	BB	BB	BB	BB	BB	BB	BB	BB	BB	BB	BB	BB	BB	BB	BB	BB
chr1_7251013_C_T	1	7251013	BOT	[T/C]	AA	AA	AA	AA	AA	AA	AA	AA	AA	AA	AA	AA	AA	AA	AA	AA	AA	AA	AA	AA	AA	AA	AA	AA	AA	AA	AA	AA	AA	AA	AA	AA	AA	AA	AA	AA	AA	AA	AA	AA	AA	AA	AA	AA	AA
chr1_728704_A_G	1	728704	TOP	[A/G]	AA	AA	AA	BB	AB	AB	BB	AB	BB	AB	AA	AB	AB	AB	AA	BB	BB	AA	AA	AB	AB	AB	AA	AA	BB	AB	BB	AB	BB	AB	AA	NC	AB	AB	AB	AB	AB	AA	AB	AB	AB	AB	AB	AB	AA
chr1_7288880_C_T	1	7288880	TOP	[A/G]	AA	AA	AA	AA	AA	AA	AA	AA	AA	AA	AA	AA	AA	AA	AA	AA	AA	AA	AA	AA	AA	AA	AA	AA	AA	AA	AA	AA	AA	AA	AA	AA	AA	AA	AA	AA	AA	AA	AA	AA	AA	AA	AA	AA	AA
chr1_7290040_A_G	1	7290040	TOP	[A/G]	AB	AB	BB	BB	AB	AB	AA	BB	AB	AB	AA	AB	AB	NC	AB	BB	AA	AB	AA	AB	AB	AB	AB	AB	BB	AB	BB	AB	BB	AA	AB	NC	AB	AB	AA	AB	AA	AB	AB	BB	AB	AB	AA	AA	AA
SNP1453_40	1	729514	BOT	[T/C]	AA	AA	AA	BB	AB	AB	BB	AB	BB	AB	AA	AB	AB	AB	AA	BB	BB	AA	AA	AB	AB	AB	AA	AA	BB	AB	BB	AB	BB	AB	AA	NC	AB	AB	AB	AB	AB	AA	AB	AB	AB	AB	AB	AB	AA
chr1_7323014_C_T	1	7323014	BOT	[T/C]	AB	AB	AA	AA	AB	AB	BB	AA	AB	AB	BB	AB	AB	BB	AB	AA	BB	AB	BB	AB	AB	AB	AB	AB	AA	AB	AB	AB	AA	BB	AB	NC	AB	AB	BB	AB	BB	AB	AB	AA	AB	AB	BB	BB	BB
be_G_T_chr1_733395	1	733395	TOP	[A/C]	BB	BB	BB	BB	BB	BB	BB	BB	BB	BB	BB	BB	BB	BB	BB	BB	BB	BB	BB	BB	BB	BB	BB	BB	BB	BB	BB	BB	BB	BB	BB	BB	BB	BB	BB	BB	BB	BB	BB	BB	BB	BB	BB	BB	BB
chr1_7349729_C_T	1	7349729	TOP	[A/G]	BB	BB	BB	BB	BB	BB	BB	BB	BB	BB	BB	BB	BB	BB	BB	BB	BB	BB	BB	BB	BB	BB	BB	BB	BB	BB	BB	BB	BB	BB	BB	BB	BB	BB	BB	BB	BB	BB	BB	BB	BB	BB	BB	BB	BB
chr1_7394780_C_T	1	7394780	TOP	[A/G]	AA	AA	AA	AA	AA	AA	AA	AA	AA	AA	AA	AA	AA	AA	AA	AA	AA	AA	AA	AA	AA	AA	AA	AA	AA	AA	AA	AA	AA	AA	AA	AA	AA	AA	AA	AA	AA	AA	AA	AA	AA	AA	AA	AA	AA
chr1_7395213_C_T	1	7395213	TOP	[A/G]	AB	AB	AA	AA	AB	AB	BB	AA	BB	AB	BB	AB	AB	BB	AB	AA	BB	AB	BB	AB	AB	AB	AB	AB	AA	AB	AB	AB	AA	BB	AB	NC	AB	AB	BB	AB	BB	AB	AB	AA	AB	AB	BB	BB	BB
chr1_7422730_C_T	1	7422730	TOP	[A/G]	AA	AA	AA	AA	AA	AA	AA	AA	AA	AA	AA	AA	AA	AA	AA	AA	AA	AA	AA	AA	AA	AA	AA	AA	AA	AA	AA	AA	AA	AA	AA	AA	AA	AA	AA	AA	AA	AA	AA	AA	AA	AA	AA	AA	AA
lb_G_A_chr1_743384	1	743384	BOT	[T/C]	BB	BB	BB	BB	BB	BB	BB	BB	BB	BB	BB	BB	BB	BB	BB	BB	BB	BB	BB	BB	BB	BB	BB	BB	BB	BB	BB	BB	BB	BB	BB	BB	BB	BB	BB	BB	BB	BB	BB	BB	BB	BB	BB	BB	BB
chr1_7440546_A_G	1	7440546	TOP	[A/G]	BB	BB	BB	BB	BB	BB	BB	BB	BB	BB	BB	BB	BB	BB	BB	BB	BB	BB	BB	BB	BB	BB	BB	BB	BB	BB	BB	BB	BB	BB	BB	BB	BB	BB	BB	BB	BB	BB	BB	BB	BB	BB	BB	BB	BB
cn_A_G_chr1_744647	1	744647	TOP	[A/G]	AA	AA	AA	AA	AA	AA	AA	AA	AA	AA	AA	AA	AA	AA	AA	AA	AA	AA	AA	AA	AA	AA	AA	AA	AA	AA	AA	AA	AA	AA	AA	AA	AA	AA	AA	AA	AA	AA	AA	AA	AA	AA	AA	AA	AA
ae_G_A_chr1_745121	1	745121	TOP	[A/G]	BB	BB	BB	BB	BB	BB	BB	BB	BB	BB	BB	BB	BB	BB	BB	BB	BB	BB	BB	BB	BB	BB	BB	BB	BB	BB	BB	BB	BB	BB	BB	BB	BB	BB	BB	BB	BB	BB	BB	BB	BB	BB	BB	BB	BB
chr1_7498727_C_T	1	7498727	BOT	[T/C]	AB	AB	AA	AA	AB	AB	BB	AA	BB	AB	BB	AB	AB	BB	AB	AA	BB	AB	BB	AB	AB	AB	AB	AB	AA	AB	AB	AB	AA	BB	AB	BB	AB	AB	BB	AB	BB	AB	AB	AA	AB	AB	BB	BB	BB
mu_s_T_C_chr1_7511958	1	7511958	BOT	[T/C]	AA	AA	AA	AA	AA	AA	AA	AA	AA	AA	AA	AA	AA	AA	AA	AA	AA	AA	AA	AA	AA	AA	AA	AA	AA	AA	AA	AA	AA	AA	AA	AA	AA	AA	AA	AA	AA	AA	AA	AA	AA	AA	AA	AA	AA
chr1_7536794_G_T	1	7536794	BOT	[T/G]	BB	BB	BB	BB	BB	BB	BB	BB	BB	BB	BB	BB	BB	BB	BB	BB	BB	BB	BB	BB	BB	BB	BB	BB	BB	BB	BB	BB	BB	BB	BB	BB	BB	BB	BB	BB	BB	BB	BB	BB	BB	BB	BB	BB	BB
chr1_7571627_C_T	1	7571627	BOT	[T/C]	AA	AA	AA	AA	AA	AA	AA	AA	AA	AA	AA	AA	AA	AA	AA	AA	AA	AA	AA	AA	AA	AA	AA	AA	AA	AA	AA	AA	AA	AA	AA	AA	AA	AA	AA	AA	AA	AA	AA	AA	AA	AA	AA	AA	AA
lb_A_C_chr1_7577532	1	7577532	BOT	[T/G]	AA	AA	AA	AA	AA	AA	AA	AA	AA	AA	AA	AA	AA	AA	AA	AA	AA	AA	AA	AA	AA	AA	AA	AA	AA	AA	AA	AA	AA	AA	AA	AA	AA	AA	AA	AA	AA	AA	AA	AA	AA	AA	AA	AA	AA
ae_C_T_chr1_7588868	1	7588868	BOT	[T/C]	BB	BB	BB	BB	BB	BB	BB	BB	BB	BB	BB	BB	BB	BB	BB	BB	BB	BB	BB	BB	BB	BB	BB	BB	BB	BB	BB	BB	BB	BB	BB	BB	BB	BB	BB	BB	BB	BB	BB	BB	BB	BB	BB	BB	BB
chr1_7593079_A_G	1	7593079	BOT	[T/C]	AA	AA	AA	AA	AA	AA	AA	AA	AA	AA	AA	AA	AA	AA	AA	AA	AA	AA	AA	AA	AA	AA	AA	AA	AA	AA	AA	AA	AA	AA	AA	AA	AA	AA	AA	AA	AA	AA	AA	AA	AA	AA	AA	AA	AA
chr1_7621682_C_T	1	7621682	BOT	[T/C]	AA	AA	AA	AA	AA	AA	AA	AA	AA	AA	AA	AA	AA	AA	AA	AA	AA	AA	AA	AA	AA	AA	AA	AA	AA	AA	AA	AA	AA	AA	AA	AA	AA	AA	AA	AA	AA	AA	AA	AA	AA	AA	AA	AA	AA
chr1_7637892_C_T	1	7637892	BOT	[T/C]	AB	AB	AA	AA	AB	AB	BB	AA	BB	AB	BB	AB	AB	BB	AB	AA	BB	AB	BB	AB	AB	AB	AB	AB	AA	AB	AB	AB	AA	BB	AB	AB	AB	AB	BB	AB	BB	AB	AB	AA	AB	AB	BB	BB	BB
chr1_765680_C_T	1	765680	BOT	[T/C]	NC	BB	BB	AA	AB	AB	AA	AB	AA	AB	BB	AB	AB	AB	BB	AA	AA	BB	BB	AB	AB	AB	BB	BB	AA	AB	AA	AB	AA	AB	BB	NC	AB	AB	AB	AB	AB	BB	AB	AB	AB	AB	AB	AB	BB
be_A_G_chr1_7658107	1	7658107	TOP	[A/G]	AA	AA	AA	AA	AA	AA	AA	AA	AA	AA	AA	AA	AA	AA	AA	AA	AA	AA	AA	AA	AA	AA	AA	AA	AA	AA	AA	AA	AA	AA	AA	AA	AA	AA	AA	AA	AA	AA	AA	AA	AA	AA	AA	AA	AA
chr1_7691369_A_G	1	7691369	BOT	[T/C]	AB	AB	BB	BB	AB	AB	AA	BB	AA	AB	AA	AB	AB	AA	AB	BB	AA	AB	AA	AB	AB	AB	AB	AB	BB	AB	AB	AB	BB	AA	AB	AA	AB	AB	AA	AB	AA	AB	AB	BB	AB	AB	AA	AA	AA
chr1_7712244_A_G	1	7712244	TOP	[A/G]	BB	BB	BB	BB	BB	BB	BB	BB	BB	BB	BB	BB	BB	BB	BB	BB	BB	BB	BB	BB	BB	BB	BB	BB	BB	BB	BB	BB	BB	BB	BB	BB	BB	BB	BB	BB	BB	BB	BB	BB	BB	BB	BB	BB	BB
chr1_7741364_C_T	1	7741364	BOT	[T/C]	BB	BB	BB	BB	BB	BB	BB	BB	BB	BB	BB	BB	BB	BB	BB	BB	BB	BB	BB	BB	BB	BB	BB	BB	BB	BB	BB	BB	BB	BB	BB	BB	BB	BB	BB	BB	BB	BB	BB	BB	BB	BB	BB	BB	BB
chr1_7785005_C_T	1	7785005	BOT	[T/C]	AB	AB	BB	BB	AB	AB	AA	BB	AA	AB	AA	AB	AB	AA	AB	BB	AA	AB	AA	AB	AB	AB	AB	AB	BB	AB	AB	AB	BB	AA	AB	NC	AB	AB	AA	AB	AA	AB	AB	BB	AB	AB	AA	AA	AA
chr1_7822798_A_G	1	7822798	TOP	[A/G]	AB	AB	BB	BB	AB	AB	AA	BB	AA	AB	AA	AB	AB	AA	AB	BB	AA	AB	AA	AB	AB	AB	AB	AB	BB	AB	AB	AB	BB	AA	AB	NC	AB	AB	AA	AB	AA	AB	AB	BB	AB	AB	AA	AA	AA
chr1_7852689_C_T	1	7852689	BOT	[T/C]	AA	AA	AA	AA	AA	AA	AA	AA	AA	AA	AA	AA	AA	AA	AA	AA	AA	AA	AA	AA	AA	AA	AA	AA	AA	AA	AA	AA	AA	AA	AA	AA	AA	AA	AA	AA	AA	AA	AA	AA	AA	AA	AA	AA	AA
chr1_7870690_A_G	1	7870690	TOP	[A/G]	BB	BB	BB	BB	BB	BB	BB	BB	BB	BB	BB	BB	BB	BB	BB	BB	BB	BB	BB	BB	BB	BB	BB	BB	BB	BB	BB	BB	BB	BB	BB	BB	BB	BB	BB	BB	BB	BB	BB	BB	BB	BB	BB	BB	BB
chr1_792517_A_C	1	792517	TOP	[A/C]	BB	BB	BB	BB	BB	BB	BB	BB	BB	BB	BB	BB	BB	BB	BB	BB	BB	BB	BB	BB	BB	BB	BB	BB	BB	BB	BB	BB	BB	BB	BB	BB	BB	BB	BB	BB	BB	BB	BB	BB	BB	BB	BB	BB	BB
chr1_7963986_A_G	1	7963986	TOP	[A/G]	AA	AA	AA	AA	AA	AA	AA	AA	AA	AA	AA	AA	AA	AA	AA	AA	AA	AA	AA	AA	AA	AA	AA	AA	AA	AA	AA	AA	AA	AA	AA	AA	AA	AA	AA	AA	AA	AA	AA	AA	AA	AA	AA	AA	AA
chr1_799033_A_C	1	799033	TOP	[A/C]	BB	BB	BB	BB	BB	BB	BB	BB	BB	BB	BB	BB	BB	BB	BB	BB	BB	BB	BB	BB	BB	BB	BB	BB	BB	BB	BB	BB	BB	BB	BB	BB	BB	BB	BB	BB	BB	BB	BB	BB	BB	BB	BB	BB	BB
chr1_799751_C_T	1	799751	BOT	[T/C]	AA	AA	AA	AA	AA	AA	AA	AA	AA	AA	AA	AA	AA	AA	AA	AA	AA	AA	AA	AA	AA	AA	AA	AA	AA	AA	AA	AA	AA	AA	AA	AA	AA	AA	AA	AA	AA	AA	AA	AA	AA	AA	AA	AA	AA
chr1_8000724_A_C	1	8000724	TOP	[A/C]	AA	AA	AA	AA	AA	AA	AA	AA	AA	AA	AA	AA	AA	AA	AA	AA	AA	AA	AA	AA	AA	AA	AA	AA	AA	AA	AA	AA	AA	AA	AA	AA	AA	AA	AA	AA	AA	AA	AA	AA	AA	AA	AA	AA	AA
chr1_8037779_C_T	1	8037779	BOT	[T/C]	BB	BB	BB	BB	BB	BB	BB	BB	BB	BB	BB	BB	BB	BB	BB	BB	BB	BB	BB	BB	BB	BB	BB	BB	BB	BB	BB	BB	BB	BB	BB	BB	BB	BB	BB	BB	BB	BB	BB	BB	BB	BB	BB	BB	BB
ae_A_C_chr1_8039405	1	8039405	TOP	[A/C]	AA	AA	AA	AA	AA	AA	AA	AA	AA	AA	AA	AA	AA	AA	AA	AA	AA	AA	AA	AA	AA	AA	AA	AA	AA	AA	AA	AA	AA	AA	AA	AA	AA	AA	AA	AA	AA	AA	AA	AA	AA	AA	AA	AA	AA
chr1_8062657_C_T	1	8062657	BOT	[T/C]	AA	AA	AA	AA	AA	AA	AA	AA	AA	AA	AA	AA	AA	AA	AA	AA	AA	AA	AA	AA	AA	AA	AA	AA	AA	AA	AA	AA	AA	AA	AA	AA	AA	AA	AA	AA	AA	AA	AA	AA	AA	AA	AA	AA	AA
chr1_8103740_C_T	1	8103740	TOP	[A/G]	BB	BB	BB	BB	BB	BB	BB	BB	BB	BB	BB	BB	BB	BB	BB	BB	BB	BB	BB	BB	BB	BB	BB	BB	BB	BB	BB	BB	BB	BB	BB	BB	BB	BB	BB	BB	BB	BB	BB	BB	BB	BB	BB	BB	BB
be_T_C_chr1_8114109	1	8114109	BOT	[T/C]	AA	AA	AA	AA	AA	AA	AA	AA	AA	AA	AA	AA	AA	AA	AA	AA	AA	AA	AA	AA	AA	AA	AA	AA	AA	AA	AA	AA	AA	AA	AA	AA	AA	AA	AA	AA	AA	AA	AA	AA	AA	AA	AA	AA	AA
chr1_8176660_A_G	1	8176660	BOT	[T/C]	BB	BB	BB	BB	BB	BB	BB	BB	BB	BB	BB	BB	BB	BB	BB	BB	BB	BB	BB	BB	BB	BB	BB	BB	BB	BB	BB	BB	BB	BB	BB	BB	BB	BB	BB	BB	BB	BB	BB	BB	BB	BB	BB	BB	BB
chr1_8202506_A_G	1	8202506	TOP	[A/G]	BB	BB	BB	BB	BB	BB	BB	BB	BB	BB	BB	BB	BB	BB	BB	BB	BB	BB	BB	BB	BB	BB	BB	BB	BB	BB	BB	BB	BB	BB	BB	BB	BB	BB	BB	BB	BB	BB	BB	BB	BB	BB	BB	BB	BB
chr1_8210025_A_G	1	8210025	BOT	[T/C]	BB	BB	BB	BB	BB	BB	BB	BB	BB	BB	BB	BB	BB	BB	BB	BB	BB	BB	BB	BB	BB	BB	BB	BB	BB	BB	BB	BB	BB	BB	BB	NC	BB	BB	BB	BB	BB	BB	BB	BB	BB	BB	BB	BB	BB
chr1_8249755_A_G	1	8249755	TOP	[A/G]	BB	BB	BB	BB	BB	BB	BB	BB	BB	BB	BB	BB	BB	BB	BB	BB	BB	BB	BB	BB	BB	BB	BB	BB	BB	BB	BB	BB	BB	BB	BB	BB	BB	BB	BB	BB	BB	BB	BB	BB	BB	BB	BB	BB	BB
chr1_8324181_A_G	1	8324181	TOP	[A/G]	BB	BB	BB	BB	BB	BB	BB	BB	BB	BB	BB	BB	BB	BB	BB	BB	BB	BB	BB	BB	BB	BB	BB	BB	BB	BB	BB	BB	BB	BB	BB	BB	BB	BB	BB	BB	BB	BB	BB	BB	BB	BB	BB	BB	BB
chr1_8429331_A_C	1	8429331	TOP	[A/C]	AB	AB	AA	AA	AB	AB	BB	AA	BB	AB	BB	AB	AB	BB	AB	AA	BB	AB	BB	AB	AB	AB	AB	AB	AA	AB	AB	AA	AA	BB	AB	BB	AB	AB	BB	AB	BB	AB	AB	AA	AB	AB	BB	AB	BB
chr1_8429533_A_G	1	8429533	BOT	[T/C]	AA	AA	AA	AA	AA	AA	AA	AA	AA	AA	AA	AA	AA	AA	AA	AA	AA	AA	AA	AA	AA	AA	AA	AA	AA	AA	AA	AA	AA	AA	AA	NC	AA	AA	AA	AA	AA	AA	AA	AA	AA	AA	AA	AA	AA
chr1_8467057_G_T	1	8467057	BOT	[T/G]	BB	BB	BB	BB	BB	BB	BB	BB	BB	BB	BB	BB	BB	BB	BB	BB	BB	BB	BB	BB	BB	BB	BB	BB	BB	BB	BB	BB	BB	BB	BB	BB	BB	BB	BB	BB	BB	BB	BB	BB	BB	BB	BB	BB	BB
chr1_8492715_C_T	1	8492715	BOT	[T/C]	AA	AA	AA	AA	AA	AA	AA	AA	AA	AA	AA	AA	AA	AA	AA	AA	AA	AA	AA	AA	AA	AA	AA	AA	AA	AA	AA	AA	AA	AA	AA	AA	AA	AA	AA	AA	AA	AA	AA	AA	AA	AA	AA	AA	AA
cn_G_A_chr1_8517555	1	8517555	TOP	[A/G]	AB	AB	AA	AA	AB	AB	BB	AA	BB	AB	BB	AB	AB	BB	AB	AA	BB	AB	BB	AB	AB	AB	AB	AB	AA	AB	AB	AA	AA	BB	AB	NC	AB	AB	BB	AB	BB	AB	AB	AA	AB	AB	BB	AB	BB
chr1_8671481_C_T	1	8671481	BOT	[T/C]	AA	AA	AA	AA	AA	AA	AA	AA	AA	AA	AA	AA	AA	AA	AA	AA	AA	AA	AA	AA	AA	AA	AA	AA	AA	AA	AA	AA	AA	AA	AA	AA	AA	AA	AA	AA	AA	AA	AA	AA	AA	AA	AA	AA	AA
chr1_8705451_G_T	1	8705451	BOT	[T/G]	AA	AA	AA	AA	AA	AA	AA	AA	AA	AA	AA	AA	AA	AA	AA	AA	AA	AA	AA	AA	AA	AA	AA	AA	AA	AA	AA	AA	AA	AA	AA	AA	AA	AA	AA	AA	AA	AA	AA	AA	AA	AA	AA	AA	AA
chr1_8710909_A_G	1	8710909	BOT	[T/C]	AB	AB	BB	BB	AB	AB	AA	BB	AA	AB	AA	AB	AB	AA	AB	BB	AA	AB	AA	AB	AB	AB	AB	AB	BB	AB	AB	BB	BB	AA	AB	NC	AB	AB	AA	AB	AA	AB	AB	BB	AB	AB	AA	AB	AA
chr1_8744093_C_T	1	8744093	TOP	[A/G]	AB	AB	AA	AA	AB	AB	BB	AA	BB	AB	BB	AB	AB	BB	AB	AA	BB	AB	BB	AB	AB	AB	AB	AB	AA	AB	AB	AA	AA	BB	AB	BB	AB	AB	BB	AB	BB	AB	AB	AA	AB	AB	BB	AB	BB
chr1_8780767_A_C	1	8780767	TOP	[A/C]	AB	AB	BB	BB	AB	AB	AA	BB	AA	AB	AA	AB	AB	AA	AB	BB	AA	AB	AA	AB	AB	AB	AB	AB	BB	AB	AB	BB	BB	AA	AB	NC	AB	AB	AA	AB	AA	AB	AB	BB	AB	AB	AA	AB	AA
chr1_8821137_A_G	1	8821137	TOP	[A/G]	BB	BB	BB	BB	BB	BB	BB	BB	BB	BB	BB	BB	BB	BB	BB	BB	BB	BB	BB	BB	BB	BB	BB	BB	BB	BB	BB	BB	BB	BB	BB	BB	BB	BB	BB	BB	BB	BB	BB	BB	BB	BB	BB	BB	BB
chr1_8850489_A_G	1	8850489	BOT	[T/C]	AA	AA	AA	AA	AA	AA	AA	AA	AA	AA	AA	AA	AA	AA	AA	AA	AA	AA	AA	AA	AA	AA	AA	AA	AA	AA	AA	AA	AA	AA	AA	AA	AA	AA	AA	AA	AA	AA	AA	AA	AA	AA	AA	AA	AA
chr1_8890473_A_C	1	8890473	TOP	[A/C]	AA	AA	AA	AA	AA	AA	AA	AA	AA	AA	AA	AA	AA	AA	AA	AA	AA	AA	AA	AA	AA	AA	AA	AA	AA	AA	AA	AA	AA	AA	AA	AA	AA	AA	AA	AA	AA	AA	AA	AA	AA	AA	AA	AA	AA
chr1_8924712_C_T	1	8924712	BOT	[T/C]	AB	AB	AA	AA	AB	AB	BB	AA	BB	AB	BB	AB	AB	BB	AB	AA	BB	AB	BB	AB	AB	AB	AB	AB	AA	AB	AB	AA	AA	BB	AB	NC	AB	AB	BB	AB	BB	AB	AB	AA	AB	AB	BB	AB	BB
chr1_8958136_C_T	1	8958136	TOP	[A/G]	AA	AA	AA	AA	AA	AA	AA	AA	AA	AA	AA	AA	AA	AA	AA	AA	AA	AA	AA	AA	AA	AA	AA	AA	AA	AA	AA	AA	AA	AA	AA	AA	AA	AA	AA	AA	AA	AA	AA	AA	AA	AA	AA	AA	AA
chr1_8975551_C_T	1	8975551	BOT	[T/C]	AA	AA	AA	AA	AA	AA	AA	AA	AA	AA	AA	AA	AA	AA	AA	AA	AA	AA	AA	AA	AA	AA	AA	AA	AA	AA	AA	AA	AA	AA	AA	AA	AA	AA	AA	AA	AA	AA	AA	AA	AA	AA	AA	AA	AA
chr1_8997177_A_C	1	8997177	TOP	[A/C]	AA	AA	AA	AA	AA	AA	AA	AA	AA	AA	AA	AA	AA	AA	AA	AA	AA	AA	AA	AA	AA	AA	AA	AA	AA	AA	AA	AA	AA	AA	AA	AA	AA	AA	AA	AA	AA	AA	AA	AA	AA	AA	AA	AA	AA
chr1_9000381_A_C	1	9000381	TOP	[A/C]	BB	BB	BB	BB	BB	BB	BB	BB	BB	BB	BB	BB	BB	BB	BB	BB	BB	BB	BB	BB	BB	BB	BB	BB	BB	BB	BB	BB	BB	BB	BB	BB	BB	BB	BB	BB	BB	BB	BB	BB	BB	BB	BB	BB	BB
chr1_9015822_A_G	1	9015822	BOT	[T/C]	AA	AA	AA	AA	AA	AA	AA	AA	AA	AA	AA	AA	AA	AA	AA	AA	AA	AA	AA	AA	AA	AA	AA	AA	AA	AA	AA	AA	AA	AA	AA	AA	AA	AA	AA	AA	AA	AA	AA	AA	AA	AA	AA	AA	AA
lb_G_A_chr1_9067492	1	9067492	TOP	[A/G]	BB	BB	BB	BB	BB	BB	BB	BB	BB	BB	BB	BB	BB	BB	BB	BB	BB	BB	BB	BB	BB	BB	BB	BB	BB	BB	BB	BB	BB	BB	BB	BB	BB	BB	BB	BB	BB	BB	BB	BB	BB	BB	BB	BB	BB
chr1_9069439_G_T	1	9069439	TOP	[A/C]	BB	BB	BB	BB	BB	BB	BB	BB	BB	BB	BB	BB	BB	BB	BB	BB	BB	BB	BB	BB	BB	BB	BB	BB	BB	BB	BB	BB	BB	BB	BB	BB	BB	BB	BB	BB	BB	BB	BB	BB	BB	BB	BB	BB	BB
chr1_9096264_A_G	1	9096264	TOP	[A/G]	BB	BB	BB	BB	BB	BB	BB	BB	BB	BB	BB	BB	BB	BB	BB	BB	BB	BB	BB	BB	BB	BB	BB	BB	BB	BB	BB	BB	BB	BB	BB	BB	BB	BB	BB	BB	BB	BB	BB	BB	BB	BB	BB	BB	BB
chr1_9242867_A_G	1	9242867	TOP	[A/G]	AA	AA	AA	AA	AA	AA	AA	AA	AA	AA	AA	AA	AA	AA	AA	AA	AA	AA	AA	AA	AA	AA	AA	AA	AA	AA	AA	AA	AA	AA	AA	AA	AA	AA	AA	AA	AA	AA	AA	AA	AA	AA	AA	AA	AA
chr1_9305946_A_G	1	9305946	TOP	[A/G]	BB	BB	BB	BB	BB	BB	BB	BB	BB	BB	BB	BB	BB	BB	BB	BB	BB	BB	BB	BB	BB	BB	BB	BB	BB	BB	BB	BB	BB	BB	BB	BB	BB	BB	BB	BB	BB	BB	BB	BB	BB	BB	BB	BB	BB
chr1_9321654_A_C	1	9321654	BOT	[T/G]	AA	AA	AA	AA	AA	AA	AA	AA	AA	AA	AA	AA	AA	AA	AA	AA	AA	AA	AA	AA	AA	AA	AA	AA	AA	AA	AA	AA	AA	AA	AA	AA	AA	AA	AA	AA	AA	AA	AA	AA	AA	AA	AA	AA	AA
mu_s_T_C_chr1_9345841	1	9345841	TOP	[A/G]	AA	AA	AA	AA	AA	AA	AA	AA	AA	AA	AA	AA	AA	AA	AA	AA	AA	AA	AA	AA	AA	AA	AA	AA	AA	AA	AA	AA	AA	AA	AA	AA	AA	AA	AA	AA	AA	AA	AA	AA	AA	AA	AA	AA	AA
chr1_9353859_A_G	1	9353859	TOP	[A/G]	AB	AB	AA	AA	AB	AB	BB	AA	BB	AB	BB	AB	AB	BB	AB	AA	BB	AB	BB	AB	AB	AB	AB	AB	AA	AB	AB	AA	AA	BB	AB	BB	AB	AB	BB	AB	BB	AB	AB	AA	AB	AB	BB	AB	BB
chr1_9436830_G_T	1	9436830	TOP	[A/C]	AB	AB	BB	BB	AB	AB	AA	BB	AA	AB	AA	AB	AB	AA	AB	BB	AA	AB	AA	AB	AB	AB	AB	AB	BB	AB	AB	BB	BB	AA	AB	NC	AB	AB	AA	AB	AA	AB	AB	BB	AB	AB	AA	AB	AA
chr1_946801_C_T	1	946801	BOT	[T/C]	BB	BB	BB	BB	BB	BB	BB	BB	BB	BB	BB	BB	BB	BB	BB	BB	BB	BB	BB	BB	BB	BB	BB	BB	BB	BB	BB	BB	BB	BB	BB	BB	BB	BB	BB	BB	BB	BB	BB	BB	BB	BB	BB	BB	BB
chr1_9496251_A_C	1	9496251	TOP	[A/C]	BB	BB	BB	BB	BB	BB	BB	BB	BB	BB	BB	BB	BB	BB	BB	BB	BB	BB	BB	BB	BB	BB	BB	BB	BB	BB	BB	BB	BB	BB	BB	BB	BB	BB	BB	BB	BB	BB	BB	BB	BB	BB	BB	BB	BB
cn_G_T_chr1_9528312	1	9528312	BOT	[T/G]	BB	BB	BB	BB	BB	BB	BB	BB	BB	BB	BB	BB	BB	BB	BB	BB	BB	BB	BB	BB	BB	BB	BB	BB	BB	BB	BB	BB	BB	BB	BB	BB	BB	BB	BB	BB	BB	BB	BB	BB	BB	BB	BB	BB	BB
chr1_9532553_A_G	1	9532553	TOP	[A/G]	AB	AB	AA	AA	AB	AB	BB	AA	BB	AB	BB	AB	AB	BB	AB	AA	BB	AB	BB	AB	AB	AB	AB	AB	AA	AB	AB	AA	AA	BB	AB	AB	AB	AB	BB	AB	BB	AB	AB	AA	AB	AB	BB	AB	BB
be_G_T_chr1_9566010	1	9566010	TOP	[A/C]	BB	BB	BB	BB	BB	BB	BB	BB	BB	BB	BB	BB	BB	BB	BB	BB	BB	BB	BB	BB	BB	BB	BB	BB	BB	BB	BB	BB	BB	BB	BB	BB	BB	BB	BB	BB	BB	BB	BB	BB	BB	BB	BB	BB	BB
chr1_9567236_G_T	1	9567236	BOT	[T/G]	AB	AB	BB	BB	AB	AB	AA	BB	AA	AB	AA	AB	AB	AA	AB	BB	AA	AB	AA	AB	AB	AB	AB	AB	BB	AB	AB	BB	BB	AA	AB	NC	AB	AB	AA	AB	AA	AB	AB	BB	AB	AB	AA	AB	AA
li_A_G_chr1_9601598	1	9601598	BOT	[T/C]	AA	AA	AA	AA	AA	AA	AA	AA	AA	AA	AA	AA	AA	AA	AA	AA	AA	AA	AA	AA	AA	AA	AA	AA	AA	AA	AA	AA	AA	AA	AA	AA	AA	AA	AA	AA	AA	AA	AA	AA	AA	AA	AA	AA	AA
chr1_9603446_A_G	1	9603446	TOP	[A/G]	AB	AB	BB	BB	AB	AB	AA	BB	AA	AB	AA	AB	AB	AA	AB	BB	AA	AB	AA	AB	AB	AB	AB	AB	BB	AB	AB	BB	BB	AA	AB	NC	AB	AB	AA	AB	AA	AB	AB	BB	AB	AB	AA	AB	AA
chr1_9697433_C_T	1	9697433	BOT	[T/C]	AA	AA	AA	AA	AA	AA	AA	AA	AA	AA	AA	AA	AA	AA	AA	AA	AA	AA	AA	AA	AA	AA	AA	AA	AA	AA	AA	AA	AA	AA	AA	AA	AA	AA	AA	AA	AA	AA	AA	AA	AA	AA	AA	AA	AA
chr1_9713401_A_G	1	9713401	BOT	[T/C]	BB	BB	BB	BB	BB	BB	BB	BB	BB	BB	BB	BB	BB	BB	BB	BB	BB	BB	BB	BB	BB	BB	BB	BB	BB	BB	BB	BB	BB	BB	BB	BB	BB	BB	BB	BB	BB	BB	BB	BB	BB	BB	BB	BB	BB
chr1_9743721_C_T	1	9743721	TOP	[A/G]	BB	BB	BB	BB	BB	BB	BB	BB	BB	BB	BB	BB	BB	BB	BB	BB	BB	BB	BB	BB	BB	BB	BB	BB	BB	BB	BB	BB	BB	BB	BB	BB	BB	BB	BB	BB	BB	BB	BB	BB	BB	BB	BB	BB	BB
chr1_9750032_A_C	1	9750032	TOP	[A/C]	BB	BB	BB	BB	BB	BB	BB	BB	BB	BB	BB	BB	BB	BB	BB	BB	BB	BB	BB	BB	BB	BB	BB	BB	BB	BB	BB	BB	BB	BB	BB	BB	BB	BB	BB	BB	BB	BB	BB	BB	BB	BB	BB	BB	BB
chr1_9779606_A_G	1	9779606	TOP	[A/G]	AB	AB	BB	BB	AB	AB	AA	BB	AA	AB	AA	AB	AB	AA	AB	BB	AA	AB	AA	AB	AB	AB	AB	AB	BB	AB	AB	BB	BB	AA	AB	NC	AB	AB	AA	AB	AA	AB	AB	BB	AB	AB	AA	AB	AA
chr1_980292_C_T	1	980292	BOT	[T/C]	AA	AA	AA	AA	AA	AA	AA	AA	AA	AA	AA	AA	AA	AA	AA	AA	AA	AA	AA	AA	AA	AA	AA	AA	AA	AA	AA	AA	AA	AA	AA	AA	AA	AA	AA	AA	AA	AA	AA	AA	AA	AA	AA	AA	AA
chr1_9816361_A_G	1	9816361	TOP	[A/G]	BB	BB	BB	BB	BB	BB	BB	BB	BB	BB	BB	BB	BB	BB	BB	BB	BB	BB	BB	BB	BB	BB	BB	BB	BB	BB	BB	BB	BB	BB	BB	BB	BB	BB	BB	BB	BB	BB	BB	BB	BB	BB	BB	BB	BB
chr1_9849128_A_G	1	9849128	TOP	[A/G]	AA	AA	AA	AA	AA	AA	AA	AA	AA	AA	AA	AA	AA	AA	AA	AA	AA	AA	AA	AA	AA	AA	AA	AA	AA	AA	AA	AA	AA	AA	AA	AA	AA	AA	AA	AA	AA	AA	AA	AA	AA	AA	AA	AA	AA
chr1_9887731_A_G	1	9887731	BOT	[T/C]	AA	AA	AA	AA	AA	AA	AA	AA	AA	AA	AA	AA	AA	AA	AA	AA	AA	AA	AA	AA	AA	AA	AA	AA	AA	AA	AA	AA	AA	AA	AA	NC	AA	AA	AA	AA	AA	AA	AA	AA	AA	AA	AA	AA	AA
chr1_9900799_C_T	1	9900799	BOT	[T/C]	BB	BB	BB	BB	BB	BB	BB	BB	BB	BB	BB	BB	BB	BB	BB	BB	BB	BB	BB	BB	BB	BB	BB	BB	BB	BB	BB	BB	BB	BB	BB	BB	BB	BB	BB	BB	BB	BB	BB	BB	BB	BB	BB	BB	BB
chr1_9923278_C_T	1	9923278	BOT	[T/C]	AA	AA	AA	AA	AA	AA	AA	AA	AA	AA	AA	AA	AA	AA	AA	AA	AA	AA	AA	AA	AA	AA	AA	AA	AA	AA	AA	AA	AA	AA	AA	AA	AA	AA	AA	AA	AA	AA	AA	AA	AA	AA	AA	AA	AA
chr1_9959141_A_C	1	9959141	TOP	[A/C]	BB	BB	BB	BB	BB	BB	BB	BB	BB	BB	BB	BB	BB	BB	BB	BB	BB	BB	BB	BB	BB	BB	BB	BB	BB	BB	BB	BB	BB	BB	BB	BB	BB	BB	BB	BB	BB	BB	BB	BB	BB	BB	BB	BB	BB
chr1_996477_A_G	1	996477	TOP	[A/G]	AA	AA	AA	AA	AA	AA	AA	AA	AA	AA	AA	AA	AA	AA	AA	AA	AA	AA	AA	AA	AA	AA	AA	AA	AA	AA	AA	AA	AA	AA	AA	AA	AA	AA	AA	AA	AA	AA	AA	AA	AA	AA	AA	AA	AA
chr1_9996086_C_T	1	9996086	BOT	[T/C]	AB	AB	BB	BB	AB	AB	AA	BB	AA	AB	AA	AB	AB	AA	AB	BB	AA	AB	AA	AB	AB	AB	AB	AB	BB	AB	AB	BB	BB	AA	AB	NC	AB	AB	AA	AB	AA	AB	AB	BB	AB	AB	AA	AB	AA
be_A_G_chr2_10119189	2	10119189	BOT	[T/C]	AA	AA	AA	AA	AA	AA	AA	AA	AA	AA	AA	AA	AA	AA	AA	AA	AA	AA	AA	AA	AA	AA	AA	AA	AA	AA	AA	AA	AA	AA	AA	AA	AA	AA	AA	AA	AA	AA	AA	AA	AA	AA	AA	AA	AA
ae_G_A_chr2_10120362	2	10120362	BOT	[T/C]	BB	BB	BB	BB	BB	BB	BB	BB	BB	BB	BB	BB	BB	BB	BB	BB	BB	BB	BB	BB	BB	BB	BB	BB	BB	BB	BB	BB	BB	BB	BB	BB	BB	BB	BB	BB	BB	BB	BB	BB	BB	BB	BB	BB	BB
lb_A_G_chr2_10199684	2	10199684	BOT	[T/C]	AB	AB	AB	AB	AB	AB	AA	AB	AB	AB	AA	AB	AB	AB	AB	AB	AB	AB	AB	AB	AB	AB	AB	AA	AA	AB	AB	AB	AB	AA	AB	AB	AB	AB	AB	AB	AB	AB	AB	AB	AB	AB	AB	AA	AB
chr2_1020916_A_G	2	1020916	TOP	[A/G]	BB	BB	BB	BB	BB	BB	BB	BB	BB	BB	BB	BB	BB	BB	BB	BB	BB	BB	BB	BB	BB	BB	BB	BB	BB	BB	BB	BB	BB	BB	BB	BB	BB	BB	BB	BB	BB	BB	BB	BB	BB	BB	BB	BB	BB
chr2_10280395_C_T	2	10280395	TOP	[A/G]	AB	BB	BB	AB	BB	AB	AA	AB	AB	AB	AA	AB	AB	AB	AB	AB	BB	AB	BB	BB	AB	AB	AB	AA	AA	BB	AB	AB	AB	AA	AB	AB	AB	BB	BB	BB	BB	AB	AB	AB	AB	AB	BB	AA	BB
chr2_10288147_A_G	2	10288147	BOT	[T/C]	BB	BB	BB	BB	BB	BB	BB	BB	BB	BB	BB	BB	BB	BB	BB	BB	BB	BB	BB	BB	BB	BB	BB	BB	BB	BB	BB	BB	BB	BB	BB	BB	BB	BB	BB	BB	BB	BB	BB	BB	BB	BB	BB	BB	BB
chr2_10292647_C_T	2	10292647	BOT	[T/C]	AB	AA	AA	AB	AA	AB	BB	AB	AB	AB	BB	AB	AB	AB	AB	AB	AA	AB	AA	AA	AB	AB	AB	BB	BB	AA	AB	AB	AB	BB	AB	AB	AB	AA	AA	AA	AA	AB	AB	AB	AB	AB	AA	BB	AA
chr2_1034330_A_C	2	1034330	TOP	[A/C]	AA	AA	AA	AA	AA	AA	AA	AA	AA	AA	AA	AA	AA	AA	AA	AA	AA	AA	AA	AA	AA	AA	AA	AA	AA	AA	AA	AA	AA	AA	AA	AA	AA	AA	AA	AA	AA	AA	AA	AA	AA	AA	AA	AA	AA
chr2_10372341_G_T	2	10372341	BOT	[T/G]	BB	BB	BB	BB	BB	BB	BB	BB	BB	BB	BB	BB	BB	BB	BB	BB	BB	BB	BB	BB	BB	BB	BB	BB	BB	BB	BB	BB	BB	BB	BB	BB	BB	BB	BB	BB	BB	BB	BB	BB	BB	BB	BB	BB	BB
chr2_10373108_A_C	2	10373108	BOT	[T/G]	BB	BB	BB	BB	BB	BB	BB	BB	BB	BB	BB	BB	BB	BB	BB	BB	BB	BB	BB	BB	BB	BB	BB	BB	BB	BB	BB	BB	BB	BB	BB	BB	BB	BB	BB	BB	BB	BB	BB	BB	BB	BB	BB	BB	BB
chr2_10418680_A_G	2	10418680	BOT	[T/C]	BB	BB	BB	BB	BB	BB	BB	BB	BB	BB	BB	BB	BB	BB	BB	BB	BB	BB	BB	BB	BB	BB	BB	BB	BB	BB	BB	BB	BB	BB	BB	BB	BB	BB	BB	BB	BB	BB	BB	BB	BB	BB	BB	BB	BB
chr2_1043891_C_T	2	1043891	TOP	[A/G]	BB	BB	BB	BB	BB	BB	BB	BB	BB	BB	BB	BB	BB	BB	BB	BB	BB	BB	BB	BB	BB	BB	BB	BB	BB	BB	BB	BB	BB	BB	BB	BB	BB	BB	BB	BB	BB	BB	BB	BB	BB	BB	BB	BB	BB
chr2_10441235_A_G	2	10441235	TOP	[A/G]	BB	BB	BB	BB	BB	BB	BB	BB	BB	BB	BB	BB	BB	BB	BB	BB	BB	BB	BB	BB	BB	BB	BB	BB	BB	BB	BB	BB	BB	BB	BB	BB	BB	BB	BB	BB	BB	BB	BB	BB	BB	BB	BB	BB	BB
chr2_10477784_G_T	2	10477784	TOP	[A/C]	BB	BB	BB	BB	BB	BB	BB	BB	BB	BB	BB	BB	BB	BB	BB	BB	BB	BB	BB	BB	BB	BB	BB	BB	BB	BB	BB	BB	BB	BB	BB	BB	BB	BB	BB	BB	BB	BB	BB	BB	BB	BB	BB	BB	BB
chr2_10503939_A_G	2	10503939	TOP	[A/G]	BB	BB	BB	BB	BB	BB	BB	BB	BB	BB	BB	BB	BB	BB	BB	BB	BB	BB	BB	BB	BB	BB	BB	BB	BB	BB	BB	BB	BB	BB	BB	BB	BB	BB	BB	BB	BB	BB	BB	BB	BB	BB	BB	BB	BB
chr2_10510317_A_G	2	10510317	BOT	[T/C]	AA	AA	AA	AA	AA	AA	AA	AA	AA	AA	AA	AA	AA	AA	AA	AA	AA	AA	AA	AA	AA	AA	AA	AA	AA	AA	AA	AA	AA	AA	AA	AA	AA	AA	AA	AA	AA	AA	AA	AA	AA	AA	AA	AA	AA
cn_G_A_chr2_10510698	2	10510698	TOP	[A/G]	BB	BB	BB	BB	BB	BB	BB	BB	BB	BB	BB	BB	BB	BB	BB	BB	BB	BB	BB	BB	BB	BB	BB	BB	BB	BB	BB	BB	BB	BB	BB	BB	BB	BB	BB	BB	BB	BB	BB	BB	BB	BB	BB	BB	BB
chr2_10654773_C_T	2	10654773	TOP	[A/G]	AA	AA	AA	AA	AA	AA	AA	AA	AA	AA	AA	AA	AA	AA	AA	AA	AA	AA	AA	AA	AA	AA	AA	AA	AA	AA	AA	AA	AA	AA	AA	AA	AA	AA	AA	AA	AA	AA	AA	AA	AA	AA	AA	AA	AA
chr2_10673869_A_G	2	10673869	TOP	[A/G]	AA	AA	AA	AA	AA	AA	AA	AA	AA	AA	AA	AA	AA	AA	AA	AA	AA	AA	AA	AA	AA	AA	AA	AA	AA	AA	AA	AA	AA	AA	AA	AA	AA	AA	AA	AA	AA	AA	AA	AA	AA	AA	AA	AA	AA
chr2_10684005_A_G	2	10684005	BOT	[T/C]	AA	AA	AA	AA	AA	AA	AA	AA	AA	AA	AA	AA	AA	AA	AA	AA	AA	AA	AA	AA	AA	AA	AA	AA	AA	AA	AA	AA	AA	AA	AA	AA	AA	AA	AA	AA	AA	AA	AA	AA	AA	AA	AA	AA	AA
chr2_10699793_A_C	2	10699793	BOT	[T/G]	AB	BB	BB	AB	BB	AB	AA	AB	AB	NC	AA	AB	AB	AB	AB	AB	BB	AB	BB	BB	AB	AB	AB	AA	AA	BB	AB	AB	AB	AA	AB	AB	AB	BB	BB	BB	BB	AB	AB	AB	AB	AB	BB	AA	BB
chr2_109895_C_T	2	109895	TOP	[A/G]	AB	AB	BB	AB	BB	BB	AB	AB	AA	AB	AB	AA	AB	NC	AB	AB	AB	BB	BB	AB	AB	BB	BB	AA	AA	BB	AB	AB	AB	AA	AB	BB	AB	BB	AB	BB	AB	AA	BB	AB	AB	AB	BB	AA	BB
mu_s_T_C_chr2_11013616	2	11013616	BOT	[T/C]	AA	AA	AA	AA	AA	AA	AA	AA	AA	AA	AA	AA	AA	AA	AA	AA	AA	AA	AA	AA	AA	AA	AA	AA	AA	AA	AA	AA	AA	AA	AA	AA	AA	AA	AA	AA	AA	AA	AA	AA	AA	AA	AA	AA	AA
chr2_1111374_C_T	2	1111374	TOP	[A/G]	AA	AA	AA	AA	AA	AA	AA	AA	AA	AA	AA	AA	AA	AA	AA	AA	AA	AA	AA	AA	AA	AA	AA	AA	AA	AA	AA	AA	AA	AA	AA	AA	AA	AA	AA	AA	AA	AA	AA	AA	AA	AA	AA	AA	AA
cn_C_T_chr2_11201668	2	11201668	BOT	[T/C]	BB	BB	BB	BB	BB	BB	BB	BB	BB	BB	BB	BB	BB	BB	BB	BB	BB	BB	BB	BB	BB	BB	BB	BB	BB	BB	BB	BB	BB	BB	BB	BB	BB	BB	BB	BB	BB	BB	BB	BB	BB	BB	BB	BB	BB
chr2_1129940_G_T	2	1129940	BOT	[T/G]	AA	AA	AA	AA	AA	AA	AA	AA	AA	AA	AA	AA	AA	AA	AA	AA	AA	AA	AA	AA	AA	AA	AA	AA	AA	AA	AA	AA	AA	AA	AA	AA	AA	AA	AA	AA	AA	AA	AA	AA	AA	AA	AA	AA	AA
chr2_1139305_A_G	2	1139305	TOP	[A/G]	BB	BB	BB	BB	BB	BB	BB	BB	BB	BB	BB	BB	BB	BB	BB	BB	BB	BB	BB	BB	BB	BB	BB	BB	BB	BB	BB	BB	BB	BB	BB	BB	BB	BB	BB	BB	BB	BB	BB	BB	BB	BB	BB	BB	BB
chr2_1169209_C_T	2	1169209	BOT	[T/C]	BB	BB	BB	BB	BB	BB	BB	BB	BB	BB	BB	BB	BB	BB	BB	BB	BB	BB	BB	BB	BB	BB	BB	BB	BB	BB	BB	BB	BB	BB	BB	BB	BB	BB	BB	BB	BB	BB	BB	BB	BB	BB	BB	BB	BB
chr2_1194240_A_C	2	1194240	TOP	[A/C]	AA	AA	AA	AA	AA	AA	AA	AA	AA	AA	AA	AA	AA	AA	AA	AA	AA	AA	AA	AA	AA	AA	AA	AA	AA	AA	AA	AA	AA	AA	AA	AA	AA	AA	AA	AA	AA	AA	AA	AA	AA	AA	AA	AA	AA
lb_T_G_chr2_12081047	2	12081047	BOT	[T/G]	BB	BB	BB	BB	BB	BB	BB	BB	BB	BB	BB	BB	BB	BB	BB	BB	BB	BB	BB	BB	BB	BB	BB	BB	BB	BB	BB	BB	BB	BB	BB	BB	BB	BB	BB	BB	BB	BB	BB	BB	BB	BB	BB	BB	BB
ae_T_C_chr2_1222166	2	1222166	BOT	[T/C]	AA	AA	AA	AA	AA	AA	AA	AA	AA	AA	AA	AA	AA	AA	AA	AA	AA	AA	AA	AA	AA	AA	AA	AA	AA	AA	AA	AA	AA	AA	AA	AA	AA	AA	AA	AA	AA	AA	AA	AA	AA	AA	AA	AA	AA
be_T_C_chr2_1227207	2	1227207	TOP	[A/G]	AA	AA	AA	AA	AA	AA	AA	AA	AA	AA	AA	AA	AA	AA	AA	AA	AA	AA	AA	AA	AA	AA	AA	AA	AA	AA	AA	AA	AA	AA	AA	AA	AA	AA	AA	AA	AA	AA	AA	AA	AA	AA	AA	AA	AA
chr2_1233291_C_T	2	1233291	TOP	[A/G]	BB	BB	BB	BB	BB	BB	BB	BB	BB	BB	BB	BB	BB	BB	BB	BB	BB	BB	BB	BB	BB	BB	BB	BB	BB	BB	BB	BB	BB	BB	BB	BB	BB	BB	BB	BB	BB	BB	BB	BB	BB	BB	BB	BB	BB
lb_G_A_chr2_1235098	2	1235098	TOP	[A/G]	BB	BB	BB	BB	BB	BB	BB	BB	BB	BB	BB	BB	BB	BB	BB	BB	BB	BB	BB	BB	BB	BB	BB	BB	BB	BB	BB	BB	BB	BB	BB	BB	BB	BB	BB	BB	BB	BB	BB	BB	BB	BB	BB	BB	BB
be_T_C_chr2_12563129	2	12563129	TOP	[A/G]	AA	AA	AA	AA	AA	AA	AA	AA	AA	AA	AA	AA	AA	AA	AA	AA	AA	AA	AA	AA	AA	AA	AA	AA	AA	AA	AA	AA	AA	AA	AA	AA	AA	AA	AA	AA	AA	AA	AA	AA	AA	AA	AA	AA	AA
chr2_1263468_A_G	2	1263468	BOT	[T/C]	BB	BB	BB	BB	BB	BB	BB	BB	BB	BB	BB	BB	BB	BB	BB	BB	BB	BB	BB	BB	BB	BB	BB	BB	BB	BB	BB	BB	BB	BB	BB	BB	BB	BB	BB	BB	BB	BB	BB	BB	BB	BB	BB	BB	BB
chr2_12651672_C_T	2	12651672	TOP	[A/G]	AB	AA	AA	AB	AA	AB	BB	AB	AB	NC	BB	AB	AB	AB	AB	AB	AA	AB	AA	AA	AB	AB	AB	BB	BB	AA	AB	AB	AB	BB	AB	AB	AB	AA	AA	AA	AA	AB	AB	BB	AB	AB	AA	BB	AA
chr2_12687047_G_T	2	12687047	BOT	[T/G]	BB	BB	BB	BB	BB	BB	BB	BB	BB	BB	BB	BB	BB	BB	BB	BB	BB	BB	BB	BB	BB	BB	BB	BB	BB	BB	BB	BB	BB	BB	BB	BB	BB	BB	BB	BB	BB	BB	BB	BB	BB	BB	BB	BB	BB
chr2_1270536_A_C	2	1270536	BOT	[T/G]	BB	BB	BB	BB	BB	BB	BB	BB	BB	BB	BB	BB	BB	BB	BB	BB	BB	BB	BB	BB	BB	BB	BB	BB	BB	BB	BB	BB	BB	BB	BB	BB	BB	BB	BB	BB	BB	BB	BB	BB	BB	BB	BB	BB	BB
chr2_12717297_A_G	2	12717297	TOP	[A/G]	AA	AA	AA	AA	AA	AA	AA	AA	AA	AA	AA	AA	AA	AA	AA	AA	AA	AA	AA	AA	AA	AA	AA	AA	AA	AA	AA	AA	AA	AA	AA	AA	AA	AA	AA	AA	AA	AA	AA	AA	AA	AA	AA	AA	AA
chr2_12966_C_T	2	12966	BOT	[T/C]	AB	AB	AA	AB	AA	AA	AB	AB	BB	AB	AB	BB	AB	AA	AB	AB	AB	AA	AA	AB	AB	AA	AA	BB	BB	AA	AB	AB	AB	BB	AB	AA	AB	AA	AB	AA	AB	BB	AA	AB	AB	AB	AA	BB	AA
lb_G_T_chr2_13011122	2	13011122	TOP	[A/C]	BB	BB	BB	BB	BB	BB	BB	BB	BB	BB	BB	BB	BB	BB	BB	BB	BB	BB	BB	BB	BB	BB	BB	BB	BB	BB	BB	BB	BB	BB	BB	BB	BB	BB	BB	BB	BB	BB	BB	BB	BB	BB	BB	BB	BB
cn_C_T_chr2_13046370	2	13046370	TOP	[A/G]	BB	BB	BB	BB	BB	BB	BB	BB	BB	BB	BB	BB	BB	BB	BB	BB	BB	BB	BB	BB	BB	BB	BB	BB	BB	BB	BB	BB	BB	BB	BB	BB	BB	BB	BB	BB	BB	BB	BB	BB	BB	BB	BB	BB	BB
ae_G_A_chr2_13046659	2	13046659	TOP	[A/G]	BB	BB	BB	BB	BB	BB	BB	BB	BB	BB	BB	BB	BB	BB	BB	BB	BB	BB	BB	BB	BB	BB	BB	BB	BB	BB	BB	BB	BB	BB	BB	BB	BB	BB	BB	BB	BB	BB	BB	BB	BB	BB	BB	BB	BB
be_C_T_chr2_13046859	2	13046859	BOT	[T/C]	BB	BB	BB	BB	BB	BB	BB	BB	BB	BB	BB	BB	BB	BB	BB	BB	BB	BB	BB	BB	BB	BB	BB	BB	BB	BB	BB	BB	BB	BB	BB	BB	BB	BB	BB	BB	BB	BB	BB	BB	BB	BB	BB	BB	BB
chr2_13059712_A_G	2	13059712	TOP	[A/G]	AA	AA	AA	AA	AA	AA	NC	AA	AA	AA	AA	AA	AA	AA	AA	AA	AA	AA	AA	AA	AA	AA	AA	NC	NC	AA	AA	AA	AA	NC	AA	AA	AA	AA	AA	AA	AA	AA	AA	NC	AA	AA	AA	NC	AA
chr2_13066496_A_G	2	13066496	TOP	[A/G]	AB	AA	AA	AB	AA	AB	BB	AB	AB	NC	BB	AB	AB	AB	AB	AB	AA	AB	AA	AA	AB	AB	AB	BB	BB	AA	AB	AB	AB	BB	AB	AB	AB	AA	AA	AA	AA	AB	AB	BB	AB	AB	AA	BB	AA
chr2_13076380_C_T	2	13076380	BOT	[T/C]	AA	AA	AA	AA	AA	AA	AA	AA	AA	AA	AA	AA	AA	AA	AA	AA	AA	AA	AA	AA	AA	AA	AA	AA	AA	AA	AA	AA	AA	AA	AA	AA	AA	AA	AA	AA	AA	AA	AA	AA	AA	AA	AA	AA	AA
chr2_13078347_A_G	2	13078347	BOT	[T/C]	AA	AA	AA	AA	AA	AA	AA	AA	AA	AA	AA	AA	AA	AA	AA	AA	AA	AA	AA	AA	AA	AA	AA	AA	NC	AA	AA	AA	AA	AA	AA	AA	AA	AA	AA	AA	AA	AA	AA	NC	AA	AA	AA	AA	AA
li_T_C_chr2_13131940	2	13131940	BOT	[T/C]	AA	AA	AA	AA	AA	AA	AA	AA	AA	AA	AA	AA	AA	AA	AA	AA	AA	AA	AA	AA	AA	AA	AA	AA	AA	AA	AA	AA	AA	AA	AA	AA	AA	AA	AA	AA	AA	AA	AA	AA	AA	AA	AA	AA	AA
chr2_13148623_A_G	2	13148623	TOP	[A/G]	AA	AA	AA	AA	AA	AA	NC	AA	AA	AA	NC	AA	AA	AA	AA	AA	AA	AA	AA	AA	AA	AA	AA	NC	NC	AA	AA	AA	AA	NC	AA	AA	AA	AA	AA	AA	AA	AA	AA	NC	AA	AA	AA	NC	AA
chr2_13397782_A_G	2	13397782	TOP	[A/G]	BB	BB	BB	BB	BB	BB	BB	BB	BB	BB	BB	BB	BB	BB	BB	BB	BB	BB	BB	BB	BB	BB	BB	BB	BB	BB	BB	BB	BB	BB	BB	BB	BB	BB	BB	BB	BB	BB	BB	BB	BB	BB	BB	BB	BB
chr2_13398576_C_T	2	13398576	BOT	[T/C]	BB	BB	BB	BB	BB	BB	BB	BB	BB	BB	BB	BB	BB	BB	BB	BB	BB	BB	BB	BB	BB	BB	BB	BB	BB	BB	BB	BB	BB	BB	BB	BB	BB	BB	BB	BB	BB	BB	BB	BB	BB	BB	BB	BB	BB
chr2_13421510_A_G	2	13421510	BOT	[T/C]	BB	BB	BB	BB	BB	BB	BB	BB	BB	BB	BB	BB	BB	BB	BB	BB	BB	BB	BB	BB	BB	BB	BB	BB	BB	BB	BB	BB	BB	BB	BB	BB	BB	BB	BB	BB	BB	BB	BB	BB	BB	BB	BB	BB	BB
chr2_13423466_A_G	2	13423466	TOP	[A/G]	AB	BB	BB	AB	BB	AB	AA	AB	AB	NC	AA	AB	AB	AB	AB	AB	BB	AB	BB	BB	AB	AB	AB	AA	AA	BB	AB	AB	AB	AA	AB	AB	AB	BB	BB	BB	BB	AB	AB	AA	AB	AB	BB	AA	BB
chr2_1347809_C_T	2	1347809	BOT	[T/C]	BB	BB	BB	BB	BB	BB	BB	BB	BB	BB	BB	BB	BB	BB	BB	BB	BB	BB	BB	BB	BB	BB	BB	BB	BB	BB	BB	BB	BB	BB	BB	NC	BB	BB	BB	BB	BB	BB	BB	BB	BB	BB	BB	BB	BB
chr2_13508002_G_T	2	13508002	BOT	[T/G]	BB	BB	BB	BB	BB	BB	BB	BB	BB	BB	BB	BB	BB	BB	BB	BB	BB	BB	BB	BB	BB	BB	BB	BB	BB	BB	BB	BB	BB	BB	BB	BB	BB	BB	BB	BB	BB	BB	BB	BB	BB	BB	BB	BB	BB
chr2_13517754_A_G	2	13517754	TOP	[A/G]	AA	AA	AA	AA	AA	AA	AA	AA	AA	AA	AA	AA	AA	AA	AA	AA	AA	AA	AA	AA	AA	AA	AA	AA	AA	AA	AA	AA	AA	AA	AA	AA	AA	AA	AA	AA	AA	AA	AA	AA	AA	AA	AA	AA	AA
be_A_C_chr2_14033310	2	14033310	TOP	[A/C]	AA	AA	AA	AA	AA	AA	AA	AA	AA	AA	AA	AA	AA	AA	AA	AA	AA	AA	AA	AA	AA	AA	AA	AA	AA	AA	AA	AA	AA	AA	AA	AA	AA	AA	AA	AA	AA	AA	AA	AA	AA	AA	AA	AA	AA
chr2_14053110_A_G	2	14053110	TOP	[A/G]	AB	AA	AA	AB	AA	AB	BB	AB	AB	AB	BB	AB	AB	AB	AB	AB	AA	AB	AA	AA	AB	AB	AB	BB	BB	AA	AB	AB	AB	BB	AB	AB	AB	AA	AA	AA	AA	AB	AB	BB	AB	AB	AA	BB	AA
chr2_14057713_G_T	2	14057713	TOP	[A/C]	AB	AA	AA	AB	AA	AB	BB	AB	AB	NC	BB	AB	AB	AB	AB	AB	AA	AB	AA	AA	AB	AB	AB	BB	BB	AA	AB	AB	AB	BB	AB	AB	AB	AA	AA	AA	AA	AB	AB	BB	AB	AB	AA	BB	AA
lb_C_T_chr2_14080081	2	14080081	TOP	[A/G]	BB	BB	BB	BB	BB	BB	BB	BB	BB	BB	BB	BB	BB	BB	BB	BB	BB	BB	BB	BB	BB	BB	BB	BB	BB	BB	BB	BB	BB	BB	BB	BB	BB	BB	BB	BB	BB	BB	BB	BB	BB	BB	BB	BB	BB
chr2_14208969_A_G	2	14208969	TOP	[A/G]	AA	AA	AA	AA	AA	AA	AA	AA	AA	AA	AA	AA	AA	AA	AA	AA	AA	AA	AA	AA	AA	AA	AA	AA	AA	AA	AA	AA	AA	AA	AA	AA	AA	AA	AA	AA	AA	AA	AA	AA	AA	AA	AA	AA	AA
cn_A_G_chr2_14210652	2	14210652	TOP	[A/G]	AA	AA	AA	AA	AA	AA	AA	AA	AA	AA	AA	AA	AA	AA	AA	AA	AA	AA	AA	AA	AA	AA	AA	AA	AA	AA	AA	AA	AA	AA	AA	AA	AA	AA	AA	AA	AA	AA	AA	AA	AA	AA	AA	AA	AA
chr2_1424334_G_T	2	1424334	BOT	[T/G]	BB	BB	BB	BB	BB	BB	BB	BB	BB	BB	BB	BB	BB	BB	BB	BB	BB	BB	BB	BB	BB	BB	BB	BB	BB	BB	BB	BB	BB	BB	BB	NC	BB	BB	BB	BB	BB	BB	BB	BB	BB	BB	BB	BB	BB
chr2_1424892_G_T	2	1424892	BOT	[T/G]	AA	AB	AB	BB	AB	BB	AB	AB	AA	NC	AB	AA	AB	BB	AB	AB	AB	BB	AB	AB	AB	AB	BB	AB	AA	BB	AB	AB	AB	AB	AB	AB	BB	AB	AA	BB	AA	AB	BB	AB	AB	AB	AB	AB	AA
chr2_14315554_G_T	2	14315554	BOT	[T/G]	AB	BB	BB	AB	BB	AB	AA	AB	AB	NC	AA	AB	AB	AB	AB	AB	BB	AB	BB	BB	AB	AB	AB	AA	AA	BB	BB	AB	AB	AA	AB	AB	AB	BB	BB	BB	BB	AB	AB	AA	AB	AB	BB	AA	BB
chr2_14353207_C_T	2	14353207	BOT	[T/C]	AA	AA	AA	AA	AA	AA	AA	AA	AA	AA	AA	AA	AA	AA	AA	AA	AA	AA	AA	AA	AA	AA	AA	AA	AA	AA	AA	AA	AA	AA	AA	AA	AA	AA	AA	AA	AA	AA	AA	AA	AA	AA	AA	AA	AA
chr2_14353671_A_G	2	14353671	TOP	[A/G]	BB	BB	BB	BB	BB	BB	BB	BB	BB	BB	BB	BB	BB	BB	BB	BB	BB	BB	BB	BB	BB	BB	BB	BB	BB	BB	BB	BB	BB	BB	BB	BB	BB	BB	BB	BB	BB	BB	BB	BB	BB	BB	BB	BB	BB
chr2_1449046_A_G	2	1449046	TOP	[A/G]	BB	AB	AB	AA	AB	AA	AB	AB	BB	AB	AB	BB	AB	NC	AB	AB	AB	AA	AB	AB	AB	AB	AA	AB	BB	AA	AB	AB	AB	AB	AB	AB	AA	AB	BB	AA	BB	AB	AA	AB	AB	AB	AB	AB	BB
chr2_14566591_C_T	2	14566591	TOP	[A/G]	AA	AA	AA	AA	AA	AA	AA	AA	AA	AA	AA	AA	AA	AA	AA	AA	AA	AA	AA	AA	AA	AA	AA	AA	AA	AA	AA	AA	AA	AA	AA	AA	AA	AA	AA	AA	AA	AA	AA	AA	AA	AA	AA	AA	AA
lb_A_C_chr2_14575206	2	14575206	BOT	[T/G]	AA	AA	AA	AA	AA	AA	AA	AA	AA	AA	AA	AA	AA	AA	AA	AA	AA	AA	AA	AA	AA	AA	AA	AA	AA	AA	AA	AA	AA	AA	AA	AA	AA	AA	AA	AA	AA	AA	AA	AA	AA	AA	AA	AA	AA
chr2_1459108_A_C	2	1459108	TOP	[A/C]	BB	BB	BB	BB	BB	BB	BB	BB	BB	BB	BB	BB	BB	BB	BB	BB	BB	BB	BB	BB	BB	BB	BB	BB	BB	BB	BB	BB	BB	BB	BB	BB	BB	BB	BB	BB	BB	BB	BB	BB	BB	BB	BB	BB	BB
chr2_14661047_C_T	2	14661047	BOT	[T/C]	AB	BB	BB	AB	BB	AB	AA	AB	AB	AB	AA	AB	AB	AB	AB	AB	BB	AB	BB	BB	AB	AB	AB	AA	AA	BB	BB	AB	AB	AA	AB	AB	AB	BB	BB	BB	BB	AB	AB	AA	AB	AB	BB	AA	BB
chr2_14702692_A_C	2	14702692	TOP	[A/C]	AB	AA	AA	AB	AA	AB	BB	AB	AB	AB	BB	AB	AB	AB	AB	AB	AA	AB	AA	AA	AB	AB	AB	BB	BB	AA	AA	AB	AB	BB	AB	AB	AB	AA	AA	AA	AA	AB	AB	BB	AB	AB	AA	BB	AA
chr2_14722422_A_C	2	14722422	TOP	[A/C]	AA	AA	AA	AA	AA	AA	AA	AA	AA	AA	AA	AA	AA	AA	AA	AA	AA	AA	AA	AA	AA	AA	AA	AA	AA	AA	AA	AA	AA	AA	AA	AA	AA	AA	AA	AA	AA	AA	AA	AA	AA	AA	AA	AA	AA
chr2_14733683_A_G	2	14733683	BOT	[T/C]	BB	BB	BB	BB	BB	BB	BB	BB	BB	BB	BB	BB	BB	BB	BB	BB	BB	BB	BB	BB	BB	BB	BB	BB	BB	BB	BB	BB	BB	BB	BB	BB	BB	BB	BB	BB	BB	BB	BB	BB	BB	BB	BB	BB	BB
chr2_14777037_A_C	2	14777037	TOP	[A/C]	BB	BB	BB	BB	BB	BB	BB	BB	BB	BB	BB	BB	BB	BB	BB	BB	BB	BB	BB	BB	BB	BB	BB	BB	BB	BB	BB	BB	BB	BB	BB	BB	BB	BB	BB	BB	BB	BB	BB	BB	BB	BB	BB	BB	BB
chr2_14822863_A_G	2	14822863	TOP	[A/G]	AB	BB	BB	AB	BB	AB	AA	AB	AB	NC	AA	AB	AB	AB	AB	AB	BB	AB	BB	BB	AB	AB	AB	AA	AA	BB	BB	AB	AB	AA	AB	AB	AB	BB	BB	BB	BB	AB	AB	AA	AB	AB	BB	AA	BB
chr2_1486301_A_G	2	1486301	TOP	[A/G]	BB	BB	BB	BB	BB	BB	BB	BB	BB	BB	BB	BB	BB	BB	BB	BB	BB	BB	BB	BB	BB	BB	BB	BB	BB	BB	BB	BB	BB	BB	BB	NC	BB	BB	BB	BB	BB	BB	BB	BB	BB	BB	BB	BB	BB
chr2_14941180_C_T	2	14941180	TOP	[A/G]	AB	AA	AA	AB	AA	AB	BB	AB	AB	AB	BB	AB	AB	AB	AB	AB	AA	AB	AA	AA	AB	AB	AB	BB	BB	AA	AA	AB	AB	BB	AB	AB	AB	AA	AA	AA	AA	AB	AB	BB	AB	AB	AA	BB	AA
chr2_14942522_A_C	2	14942522	BOT	[T/G]	AB	AA	AA	AB	AA	AB	BB	AB	AB	AB	BB	AB	AB	AB	AB	AB	AA	AB	AA	AA	AB	AB	AB	BB	BB	AA	AA	AB	AB	BB	AB	AB	AB	AA	AA	AA	AA	AB	AB	BB	AB	AB	AA	BB	AA
chr2_14954503_C_T	2	14954503	TOP	[A/G]	AA	AA	AA	AA	AA	AA	AA	AA	AA	AA	AA	AA	AA	AA	AA	AA	AA	AA	AA	AA	AA	AA	AA	AA	AA	AA	AA	AA	AA	AA	AA	AA	AA	AA	AA	AA	AA	AA	AA	AA	AA	AA	AA	AA	AA
chr2_14954585_C_T	2	14954585	BOT	[T/C]	AB	AA	AA	AB	AA	AB	BB	AB	AB	AB	BB	AB	AB	AB	AB	AB	AA	AB	AA	AA	AB	AB	AB	BB	BB	AA	AA	AB	AB	BB	AB	AB	AB	AA	AA	AA	AA	AB	AB	BB	AB	AB	AA	BB	AA
chr2_1497526_A_G	2	1497526	TOP	[A/G]	BB	BB	BB	BB	BB	BB	BB	BB	BB	BB	BB	BB	BB	BB	BB	BB	BB	BB	BB	BB	BB	BB	BB	BB	BB	BB	BB	BB	BB	BB	BB	BB	BB	BB	BB	BB	BB	BB	BB	BB	BB	BB	BB	BB	BB
chr2_14983912_C_T	2	14983912	TOP	[A/G]	AB	BB	BB	AB	BB	AB	AA	AB	AB	NC	AA	AB	AB	AB	AB	AB	BB	AB	BB	BB	AB	AB	AB	AA	AA	BB	BB	AB	AB	AA	AB	AB	AB	BB	BB	BB	BB	AB	AB	AA	AB	AB	BB	AA	BB
lb_T_C_chr2_15069100	2	15069100	TOP	[A/G]	AA	AA	AA	AA	AA	AA	AA	AA	AA	AA	AA	AA	AA	AA	AA	AA	AA	AA	AA	AA	AA	AA	AA	AA	AA	AA	AA	AA	AA	AA	AA	AA	AA	AA	AA	AA	AA	AA	AA	AA	AA	AA	AA	AA	AA
chr2_15099077_C_T	2	15099077	BOT	[T/C]	AB	BB	BB	AB	BB	AB	AA	AB	AB	AB	AA	AB	AB	AB	AB	AB	BB	AB	BB	BB	AB	AB	AB	AA	AA	BB	BB	AB	AB	AA	AB	AB	AB	BB	BB	BB	BB	AB	AB	AA	AB	AB	BB	AA	BB
chr2_15113892_C_T	2	15113892	BOT	[T/C]	AB	BB	BB	AB	BB	AB	AA	AB	AB	AB	AA	AB	AB	AB	AB	AB	BB	AB	BB	BB	AB	AB	AB	AA	AA	BB	BB	AB	AB	AA	AB	AB	AB	BB	BB	BB	BB	AB	AB	AA	AB	AB	BB	AA	BB
chr2_15130499_C_T	2	15130499	TOP	[A/G]	AA	AA	AA	AA	AA	AA	AA	AA	AA	AA	AA	AA	AA	AA	AA	AA	AA	AA	AA	AA	AA	AA	AA	AA	AA	AA	AA	AA	AA	AA	AA	AA	AA	AA	AA	AA	AA	AA	AA	AA	AA	AA	AA	AA	AA
chr2_15148539_C_T	2	15148539	BOT	[T/C]	BB	BB	BB	BB	BB	BB	BB	BB	BB	BB	BB	BB	BB	BB	BB	BB	BB	BB	BB	BB	BB	BB	BB	BB	BB	BB	BB	BB	BB	BB	BB	BB	BB	BB	BB	BB	BB	BB	BB	BB	BB	BB	BB	BB	BB
chr2_1539000_A_G	2	1539000	BOT	[T/C]	BB	BB	BB	BB	BB	BB	BB	BB	BB	BB	BB	BB	BB	BB	BB	BB	BB	BB	BB	BB	BB	BB	BB	BB	BB	BB	BB	BB	BB	BB	BB	BB	BB	BB	BB	BB	BB	BB	BB	BB	BB	BB	BB	BB	BB
chr2_15412739_C_T	2	15412739	TOP	[A/G]	AB	AA	AA	AB	AA	AB	BB	AB	AB	AB	BB	AB	AB	AB	AB	AB	AA	AB	AA	AA	AB	AB	AB	BB	BB	AA	AA	AB	AB	BB	AB	AB	AB	AA	AA	AA	AA	AB	AB	BB	AB	AB	AA	BB	AA
cn_T_G_chr2_15578416	2	15578416	BOT	[T/G]	AA	AA	AA	AA	AA	AA	AA	AA	AA	AA	AA	AA	AA	AA	AA	AA	AA	AA	AA	AA	AA	AA	AA	AA	AA	AA	AA	AA	AA	AA	AA	AA	AA	AA	AA	AA	AA	AA	AA	AA	AA	AA	AA	AA	AA
chr2_15635103_A_G	2	15635103	TOP	[A/G]	AB	AB	AB	AB	AB	AB	BB	AB	AB	AB	BB	AB	AB	AB	AB	AB	AB	AB	AB	AB	AB	AB	AB	BB	BB	AB	AB	AB	AB	BB	AB	AB	AB	AB	AB	AB	AB	AB	AB	BB	AB	AB	AB	BB	AB
chr2_15635828_A_G	2	15635828	BOT	[T/C]	BB	BB	BB	BB	BB	BB	BB	BB	BB	BB	BB	BB	BB	BB	BB	BB	BB	BB	BB	BB	BB	BB	BB	BB	BB	BB	BB	BB	BB	BB	BB	BB	BB	BB	BB	BB	BB	BB	BB	BB	BB	BB	BB	BB	BB
chr2_1579733_C_T	2	1579733	TOP	[A/G]	AA	AA	AA	AA	AA	AA	AA	AA	AA	AA	AA	AA	AA	AA	AA	AA	AA	AA	AA	AA	AA	AA	AA	AA	AA	AA	AA	AA	AA	AA	AA	AA	AA	AA	AA	AA	AA	AA	AA	AA	AA	AA	AA	AA	AA
chr2_15833950_A_G	2	15833950	TOP	[A/G]	AB	AA	AA	AB	AA	AB	BB	AB	AB	AB	BB	AB	AB	AB	AB	AB	AA	AB	AA	AA	AB	AB	AB	BB	BB	AA	AA	AB	AB	BB	AB	AB	AB	AA	AA	AA	AA	AB	AB	AB	AB	AB	AA	BB	AA
chr2_15835744_C_T	2	15835744	BOT	[T/C]	AB	BB	BB	AB	BB	AB	AA	AB	AB	AB	AA	AB	AB	AB	AB	AB	BB	AB	BB	BB	AB	AB	AB	AA	AA	BB	BB	AB	AB	AA	AB	AB	AB	BB	BB	BB	BB	AB	AB	AB	AB	AB	BB	AA	BB
chr2_16044596_A_G	2	16044596	TOP	[A/G]	AA	AA	AA	AA	AA	AA	AA	AA	AA	AA	AA	AA	AA	AA	AA	AA	AA	AA	AA	AA	AA	AA	AA	AA	AA	AA	AA	AA	AA	AA	AA	AA	AA	AA	AA	AA	AA	AA	AA	AA	AA	AA	AA	AA	AA
chr2_16048099_C_T	2	16048099	BOT	[T/C]	AB	BB	BB	AB	BB	AB	AA	AB	AB	AB	AA	AB	AB	AB	AB	AB	BB	AB	BB	BB	AB	AB	AB	AA	AA	BB	BB	AB	AB	AA	AB	AB	AB	BB	BB	BB	BB	AB	AB	AB	AB	AB	BB	AA	BB
be_A_G_chr2_16050721	2	16050721	TOP	[A/G]	AA	AA	AA	AA	AA	AA	AA	AA	AA	AA	AA	AA	AA	AA	AA	AA	AA	AA	AA	AA	AA	AA	AA	AA	AA	AA	AA	AA	AA	AA	AA	AA	AA	AA	AA	AA	AA	AA	AA	AA	AA	AA	AA	AA	AA
chr2_1606894_A_G	2	1606894	TOP	[A/G]	AA	AB	AB	BB	AB	BB	AB	AB	AA	AB	AB	AA	AB	BB	AB	AB	AB	BB	AB	AB	AB	AB	BB	AB	AA	BB	AB	AB	AB	AB	AB	AB	BB	AB	AA	BB	AA	AB	BB	AB	AB	AB	BB	AB	AA
chr2_16084660_G_T	2	16084660	TOP	[A/C]	AA	AA	AA	AA	AA	AA	AA	AA	AA	AA	AA	AA	AA	AA	AA	AA	AA	AA	AA	AA	AA	AA	AA	AA	AA	AA	AA	AA	AA	AA	AA	AA	AA	AA	AA	AA	AA	AA	AA	AA	AA	AA	AA	AA	AA
chr2_161067_C_T	2	161067	BOT	[T/C]	BB	BB	BB	BB	BB	BB	BB	BB	BB	BB	BB	BB	BB	BB	BB	BB	BB	BB	BB	BB	BB	BB	BB	BB	BB	BB	BB	BB	BB	BB	BB	BB	BB	BB	BB	BB	BB	BB	BB	BB	BB	BB	BB	BB	BB
chr2_16280570_C_T	2	16280570	BOT	[T/C]	AB	AA	AA	AB	AA	AB	BB	AB	AB	AB	BB	AB	AB	AB	AB	AB	AA	AB	AA	AA	AB	AB	AB	BB	BB	AA	AA	AB	AB	BB	AB	AB	AB	AA	AA	AA	AA	AB	AB	AB	AB	AB	AA	BB	AA
chr2_16302151_A_G	2	16302151	TOP	[A/G]	AB	AA	AA	AB	AA	AB	BB	AB	AB	AB	BB	AB	AB	AB	AB	AB	AA	AB	AA	AA	AB	AB	AB	BB	BB	AA	AA	AB	AB	BB	AB	AB	AB	AA	AA	AA	AA	AB	AB	AB	AB	AB	AA	BB	AA
chr2_16328837_A_G	2	16328837	BOT	[T/C]	AB	BB	BB	AB	BB	AB	AA	AB	AB	AB	AA	AB	AB	AB	AB	AB	BB	AB	BB	BB	AB	AB	AB	AA	AA	BB	BB	AB	AB	AA	AB	AB	AB	BB	BB	BB	BB	AB	AB	AB	AB	AB	BB	AA	BB
chr2_1639758_A_G	2	1639758	BOT	[T/C]	AA	AA	AA	AA	AA	AA	AA	AA	AA	AA	AA	AA	AA	AA	AA	AA	AA	AA	AA	AA	AA	AA	AA	AA	AA	AA	AA	AA	AA	AA	AA	AA	AA	AA	AA	AA	AA	AA	AA	AA	AA	AA	AA	AA	AA
chr2_16484854_C_T	2	16484854	TOP	[A/G]	AA	AA	AA	AA	AA	AA	AA	AA	AA	AA	AA	AA	AA	AA	AA	AA	AA	AA	AA	AA	AA	AA	AA	AA	AA	AA	AA	AA	AA	AA	AA	AA	AA	AA	AA	AA	AA	AA	AA	AA	AA	AA	AA	AA	AA
chr2_16495943_C_T	2	16495943	BOT	[T/C]	AB	BB	BB	AB	BB	AB	AA	AB	AB	AB	AA	AB	AB	AB	AB	AB	BB	AB	BB	BB	AB	AB	AB	AA	AA	BB	BB	AB	AB	AA	AB	AB	AB	BB	BB	BB	BB	AB	AB	AB	AB	AB	BB	AA	BB
ae_C_A_chr2_16528761	2	16528761	BOT	[T/G]	BB	BB	BB	BB	BB	BB	BB	BB	BB	BB	BB	BB	BB	BB	BB	BB	BB	BB	BB	BB	BB	BB	BB	BB	BB	BB	BB	BB	BB	BB	BB	BB	BB	BB	BB	BB	BB	BB	BB	BB	BB	BB	BB	BB	BB
chr2_16538196_A_G	2	16538196	TOP	[A/G]	AA	AA	AA	AA	AA	AA	AA	AA	AA	AA	AA	AA	AA	AA	AA	AA	AA	AA	AA	AA	AA	AA	AA	AA	AA	AA	AA	AA	AA	AA	AA	AA	AA	AA	AA	AA	AA	AA	AA	AA	AA	AA	AA	AA	AA
be_T_C_chr2_16538398	2	16538398	TOP	[A/G]	AA	AA	AA	AA	AA	AA	AA	AA	AA	AA	AA	AA	AA	AA	AA	AA	AA	AA	AA	AA	AA	AA	AA	AA	AA	AA	AA	AA	AA	AA	AA	AA	AA	AA	AA	AA	AA	AA	AA	AA	AA	AA	AA	AA	AA
chr2_16539681_A_G	2	16539681	BOT	[T/C]	AA	AA	AA	AA	AA	AA	AA	AA	AA	AA	AA	AA	AA	AA	AA	AA	AA	AA	AA	AA	AA	AA	AA	AA	AA	AA	AA	AA	AA	AA	AA	AA	AA	AA	AA	AA	AA	AA	AA	AA	AA	AA	AA	AA	AA
chr2_16540832_A_G	2	16540832	TOP	[A/G]	AB	BB	BB	AB	BB	AB	AA	AB	AB	AB	AA	AB	AB	AB	AB	AB	BB	AB	BB	BB	AB	AB	AB	AA	AA	BB	BB	AB	AB	AA	AB	AB	AB	BB	BB	BB	BB	AB	AB	AB	AB	AB	BB	AA	BB
chr2_16550998_A_G	2	16550998	BOT	[T/C]	AA	AA	AA	AA	AA	AA	AA	AA	AA	AA	AA	AA	AA	AA	AA	AA	AA	AA	AA	AA	AA	AA	AA	AA	AA	AA	AA	AA	AA	AA	AA	AA	AA	AA	AA	AA	AA	AA	AA	AA	AA	AA	AA	AA	AA
chr2_1656518_C_T	2	1656518	TOP	[A/G]	BB	BB	BB	BB	BB	BB	BB	BB	BB	BB	BB	BB	BB	BB	BB	BB	BB	BB	BB	BB	BB	BB	BB	BB	BB	BB	BB	BB	BB	BB	BB	BB	BB	BB	BB	BB	BB	BB	BB	BB	BB	BB	BB	BB	BB
chr2_16619946_C_T	2	16619946	TOP	[A/G]	BB	BB	BB	BB	BB	BB	BB	BB	BB	BB	BB	BB	BB	BB	BB	BB	BB	BB	BB	BB	BB	BB	BB	BB	BB	BB	BB	BB	BB	BB	BB	BB	BB	BB	BB	BB	BB	BB	BB	BB	BB	BB	BB	BB	BB
chr2_16652759_A_G	2	16652759	BOT	[T/C]	AB	AA	AA	AB	AA	AB	BB	AB	AB	AB	BB	AB	AB	AB	AB	AB	AA	AB	AA	AA	AB	AB	AB	BB	BB	AA	AA	AB	AB	BB	AB	AB	AB	AA	AA	AA	AA	AB	AB	AB	AB	AB	AA	BB	AA
chr2_1667505_A_G	2	1667505	TOP	[A/G]	AB	AB	AB	AB	AB	AB	AB	AB	AB	AB	AB	AB	AB	AB	AB	AB	AB	AB	AB	AB	AB	AB	AB	AB	AB	AB	AB	AB	AB	AB	AB	AB	AB	AB	AB	AB	AB	AB	AB	AB	AB	AB	AB	AB	AB
chr2_16684333_A_G	2	16684333	BOT	[T/C]	AB	BB	BB	AB	BB	AB	AA	AB	AB	AB	AA	AB	AB	AB	AB	AB	BB	AB	BB	BB	AB	AB	AB	AA	AA	BB	BB	AB	AB	AA	AB	AB	AB	BB	BB	BB	BB	AB	AB	AB	AB	AB	BB	AA	BB
chr2_16788326_C_T	2	16788326	TOP	[A/G]	AB	BB	BB	AB	BB	AB	AA	AB	AB	AB	AA	AB	AB	AB	AB	AB	BB	AB	BB	BB	AB	AB	AB	AA	AA	BB	BB	AB	AB	AA	AB	AB	AB	BB	BB	BB	BB	AB	AB	AB	AB	AB	BB	AA	BB
chr2_16788656_C_T	2	16788656	TOP	[A/G]	AB	AA	AA	AB	AA	AB	BB	AB	AB	AB	BB	AB	AB	AB	AB	AB	AA	AB	AA	AA	AB	AB	AB	BB	BB	AA	AA	AB	AB	BB	AB	AB	AB	AA	AA	AA	AA	AB	AB	AB	AB	AB	AA	BB	AA
chr2_16808228_C_T	2	16808228	TOP	[A/G]	AB	BB	BB	AB	BB	AB	AA	AB	AB	AB	AA	AB	AB	AB	AB	AB	BB	AB	BB	BB	AB	AB	AB	AA	AA	BB	BB	AB	AB	AA	AB	AB	AB	BB	BB	BB	BB	AB	AB	AB	AB	AB	BB	AA	BB
chr2_16814230_A_G	2	16814230	TOP	[A/G]	BB	BB	BB	BB	BB	BB	BB	BB	BB	BB	BB	BB	BB	BB	BB	BB	BB	BB	BB	BB	BB	BB	BB	BB	BB	BB	BB	BB	BB	BB	BB	BB	BB	BB	BB	BB	BB	BB	BB	BB	BB	BB	BB	BB	BB
chr2_16854734_C_T	2	16854734	BOT	[T/C]	AB	AA	AA	AB	AA	AB	BB	AB	AB	AB	BB	AB	AB	AB	AB	AB	AA	AB	AA	AA	AB	AB	AB	BB	BB	AA	AA	AB	AB	BB	AB	AB	AB	AA	AA	AA	AA	AB	AB	AB	AB	AB	AA	BB	AA
chr2_16869475_G_T	2	16869475	BOT	[T/G]	BB	BB	BB	BB	BB	BB	BB	BB	BB	BB	BB	BB	BB	BB	BB	BB	BB	BB	BB	BB	BB	BB	BB	BB	BB	BB	BB	BB	BB	BB	BB	BB	BB	BB	BB	BB	BB	BB	BB	BB	BB	BB	BB	BB	BB
mu_o_C_T_chr2_16881599	2	16881599	TOP	[A/G]	BB	BB	BB	BB	BB	BB	BB	BB	BB	BB	BB	BB	BB	BB	BB	BB	BB	BB	BB	BB	BB	BB	BB	BB	BB	BB	BB	BB	BB	BB	BB	BB	BB	BB	BB	BB	BB	BB	BB	BB	BB	BB	BB	BB	BB
chr2_16900669_A_G	2	16900669	TOP	[A/G]	AA	AA	AA	AA	AA	AA	AA	AA	AA	AA	AA	AA	AA	AA	AA	AA	AA	AA	AA	AA	AA	AA	AA	AA	AA	AA	AA	AA	AA	AA	AA	AA	AA	AA	AA	AA	AA	AA	AA	AA	AA	AA	AA	AA	AA
chr2_16916164_A_C	2	16916164	TOP	[A/C]	AB	BB	BB	AB	BB	AB	AA	AB	AB	AB	AA	AB	AB	AB	AB	AB	BB	AB	BB	BB	AB	AB	AB	AA	AA	BB	BB	AB	AB	AA	AB	AB	AB	BB	BB	BB	BB	AB	AB	AB	AB	AB	BB	AA	BB
chr2_16930617_A_G	2	16930617	TOP	[A/G]	AB	AA	AA	AB	AA	AB	BB	AB	AB	AB	BB	AB	AB	AB	AB	AB	AA	AB	AA	AA	AB	AB	AB	BB	BB	AA	AA	AB	AB	BB	AB	AB	AB	AA	AA	AA	AA	AB	AB	AB	AB	AB	AA	BB	AA
be_A_G_chr2_17017072	2	17017072	BOT	[T/C]	AA	AA	AA	AA	AA	AA	AA	AA	AA	AA	AA	AA	AA	AA	AA	AA	AA	AA	AA	AA	AA	AA	AA	AA	AA	AA	AA	AA	AA	AA	AA	AA	AA	AA	AA	AA	AA	AA	AA	AA	AA	AA	AA	AA	AA
chr2_17148717_A_G	2	17148717	BOT	[T/C]	BB	BB	BB	BB	BB	BB	BB	BB	BB	BB	BB	BB	BB	BB	BB	BB	BB	BB	BB	BB	BB	BB	BB	BB	BB	BB	BB	BB	BB	BB	BB	BB	BB	BB	BB	BB	BB	BB	BB	BB	BB	BB	BB	BB	BB
chr2_17149486_C_T	2	17149486	BOT	[T/C]	AB	AA	AA	AB	AA	AB	BB	AB	AB	AB	BB	AB	AB	AB	AB	AB	AA	AB	AA	AA	AB	AB	AB	BB	BB	AA	AA	AB	AB	BB	AB	AB	AB	AA	AA	AA	AA	AB	AB	AB	AB	AB	AA	BB	AA
chr2_17150032_A_G	2	17150032	BOT	[T/C]	AB	AA	AA	AB	AA	AB	BB	AB	AB	AB	BB	AB	AB	AB	AB	AB	AA	AB	AA	AA	AB	AB	AB	BB	BB	AA	AA	AB	AB	BB	AB	AB	AB	AA	AA	AA	AA	AB	AB	AB	AB	AB	AA	BB	AA
chr2_17184542_A_G	2	17184542	BOT	[T/C]	AB	BB	BB	AB	BB	AB	AA	AB	AB	AB	AA	AB	AB	AB	AB	AB	BB	AB	BB	BB	AB	AB	AB	AA	AA	BB	BB	AB	AB	AA	AB	AB	AB	BB	BB	BB	BB	AB	AB	AB	AB	AB	BB	AA	BB
chr2_17216929_G_T	2	17216929	TOP	[A/C]	BB	BB	BB	BB	BB	BB	BB	BB	BB	BB	BB	BB	BB	BB	BB	BB	BB	BB	BB	BB	BB	BB	BB	BB	BB	BB	BB	BB	BB	BB	BB	BB	BB	BB	BB	BB	BB	BB	BB	BB	BB	BB	BB	BB	BB
cn_G_A_chr2_1726990	2	1726990	TOP	[A/G]	BB	BB	BB	BB	BB	BB	BB	BB	BB	BB	BB	BB	BB	BB	BB	BB	BB	BB	BB	BB	BB	BB	BB	BB	BB	BB	BB	BB	BB	BB	BB	BB	BB	BB	BB	BB	BB	BB	BB	BB	BB	BB	BB	BB	BB
chr2_17275097_C_T	2	17275097	BOT	[T/C]	AB	BB	BB	AB	BB	AB	AA	AB	AB	AB	AA	AB	AB	AB	AB	AB	BB	AB	BB	BB	AB	AB	AB	AA	AA	BB	BB	AB	AB	AA	AB	AB	AB	BB	BB	BB	BB	AB	AB	AB	AB	AB	BB	AA	BB
chr2_1729027_C_T	2	1729027	TOP	[A/G]	AA	AA	AA	AA	AA	AA	AA	AA	AA	AA	AA	AA	AA	AA	AA	AA	AA	AA	AA	AA	AA	AA	AA	AA	AA	AA	AA	AA	AA	AA	AA	AA	AA	AA	AA	AA	AA	AA	AA	AA	AA	AA	AA	AA	AA
chr2_17308518_C_T	2	17308518	TOP	[A/G]	BB	BB	BB	BB	BB	BB	BB	BB	BB	BB	BB	BB	BB	BB	BB	BB	BB	BB	BB	BB	BB	BB	BB	BB	BB	BB	BB	BB	BB	BB	BB	BB	BB	BB	BB	BB	BB	BB	BB	BB	BB	BB	BB	BB	BB
chr2_17340911_G_T	2	17340911	BOT	[T/G]	BB	BB	BB	BB	BB	BB	BB	BB	BB	BB	BB	BB	BB	BB	BB	BB	BB	BB	BB	BB	BB	BB	BB	BB	BB	BB	BB	BB	BB	BB	BB	BB	BB	BB	BB	BB	BB	BB	BB	BB	BB	BB	BB	BB	BB
be_C_A_chr2_1735056	2	1735056	TOP	[A/C]	BB	BB	BB	BB	BB	BB	BB	BB	BB	BB	BB	BB	BB	BB	BB	BB	BB	BB	BB	BB	BB	BB	BB	BB	BB	BB	BB	BB	BB	BB	BB	BB	BB	BB	BB	BB	BB	BB	BB	BB	BB	BB	BB	BB	BB
chr2_17369631_A_G	2	17369631	BOT	[T/C]	AA	AA	AA	AA	AA	AA	AA	AA	AA	AA	AA	AA	AA	AA	AA	AA	AA	AA	AA	AA	AA	AA	AA	AA	AA	AA	AA	AA	AA	AA	AA	AA	AA	AA	AA	AA	AA	AA	AA	AA	AA	AA	AA	AA	AA
chr2_17400888_A_G	2	17400888	TOP	[A/G]	BB	BB	BB	BB	BB	BB	BB	BB	BB	BB	BB	BB	BB	BB	BB	BB	BB	BB	BB	BB	BB	BB	BB	BB	BB	BB	BB	BB	BB	BB	BB	BB	BB	BB	BB	BB	BB	BB	BB	BB	BB	BB	BB	BB	BB
chr2_17403109_G_T	2	17403109	TOP	[A/C]	BB	BB	BB	BB	BB	BB	BB	BB	BB	BB	BB	BB	BB	BB	BB	BB	BB	BB	BB	BB	BB	BB	BB	BB	BB	BB	BB	BB	BB	BB	BB	BB	BB	BB	BB	BB	BB	BB	BB	BB	BB	BB	BB	BB	BB
chr2_17447263_C_T	2	17447263	BOT	[T/C]	AA	AA	AA	AA	AA	AA	AA	AA	AA	AA	AA	AA	AA	AA	AA	AA	AA	AA	AA	AA	AA	AA	AA	AA	AA	AA	AA	AA	AA	AA	AA	AA	AA	AA	AA	AA	AA	AA	AA	AA	AA	AA	AA	AA	AA
chr2_17448179_G_T	2	17448179	BOT	[T/G]	AB	AA	AA	AB	AA	AB	BB	AB	AB	AB	BB	AB	AB	AB	AB	AB	AA	AB	AA	AA	AB	AB	AB	BB	BB	AA	AA	AB	AB	BB	AB	AB	AB	AA	AA	AA	AA	AB	AB	AB	AB	AB	AA	BB	AA
cn_C_T_chr2_17515258	2	17515258	BOT	[T/C]	AB	AA	AA	AB	AA	AB	BB	AB	AB	AB	BB	AB	AB	AB	AB	AB	AA	AB	AA	AA	AB	AB	AB	BB	BB	AA	AA	AB	AB	BB	AB	AB	AB	AA	AA	AA	AA	AB	AB	AB	AB	AB	AA	BB	AA
lb_T_C_chr2_17518429	2	17518429	BOT	[T/C]	AA	AA	AA	AA	AA	AA	AA	AA	AA	AA	AA	AA	AA	AA	AA	AA	AA	AA	AA	AA	AA	AA	AA	AA	AA	AA	AA	AA	AA	AA	AA	AA	AA	AA	AA	AA	AA	AA	AA	AA	AA	AA	AA	AA	AA
chr2_17602936_C_T	2	17602936	TOP	[A/G]	AA	AA	AA	AA	AA	AA	AA	AA	AA	AA	AA	AA	AA	AA	AA	AA	AA	AA	AA	AA	AA	AA	AA	AA	AA	AA	AA	AA	AA	AA	AA	AA	AA	AA	AA	AA	AA	AA	AA	AA	AA	AA	AA	AA	AA
chr2_17616602_C_T	2	17616602	TOP	[A/G]	AB	BB	BB	AB	BB	AB	AA	AB	AB	AB	AA	AB	AB	AB	AB	AB	BB	AB	BB	BB	AB	AB	AB	AA	AA	BB	BB	AB	AB	AA	AB	AB	AB	BB	BB	BB	BB	AB	AB	AB	AB	AB	BB	AA	BB
chr2_17647143_G_T	2	17647143	TOP	[A/C]	BB	BB	BB	BB	BB	BB	BB	BB	BB	BB	BB	BB	BB	BB	BB	BB	BB	BB	BB	BB	BB	BB	BB	BB	BB	BB	BB	BB	BB	BB	BB	BB	BB	BB	BB	BB	BB	BB	BB	BB	BB	BB	BB	BB	BB
chr2_17677589_A_G	2	17677589	BOT	[T/C]	BB	BB	BB	BB	BB	BB	BB	BB	BB	BB	BB	BB	BB	BB	BB	BB	BB	BB	BB	BB	BB	BB	BB	BB	BB	BB	BB	BB	BB	BB	BB	BB	BB	BB	BB	BB	BB	BB	BB	BB	BB	BB	BB	BB	BB
chr2_17694758_C_T	2	17694758	TOP	[A/G]	AA	AA	AA	AA	AA	AA	AA	AA	AA	AA	AA	AA	AA	AA	AA	AA	AA	AA	AA	AA	AA	AA	AA	AA	AA	AA	AA	AA	AA	AA	AA	AA	AA	AA	AA	AA	AA	AA	AA	AA	AA	AA	AA	AA	AA
chr2_17712162_C_T	2	17712162	BOT	[T/C]	BB	BB	BB	BB	BB	BB	BB	BB	BB	BB	BB	BB	BB	BB	BB	BB	BB	BB	BB	BB	BB	BB	BB	BB	BB	BB	BB	BB	BB	BB	BB	BB	BB	BB	BB	BB	BB	BB	BB	BB	BB	BB	BB	BB	BB
Vvi_805	2	17733130	TOP	[A/G]	BB	BB	BB	BB	BB	BB	BB	BB	BB	BB	BB	BB	BB	BB	BB	BB	BB	BB	BB	BB	BB	BB	BB	BB	BB	BB	BB	BB	BB	BB	BB	BB	BB	BB	BB	BB	BB	BB	BB	BB	BB	BB	BB	BB	BB
chr2_17743000_A_G	2	17743000	TOP	[A/G]	AB	BB	BB	AB	BB	AB	AA	AB	AB	AB	AA	AB	AB	AB	AB	AB	BB	AB	BB	BB	AB	AB	AB	AA	AA	BB	BB	AB	AB	AA	AB	AB	AB	BB	BB	BB	BB	AB	AB	AB	AB	AB	BB	AA	BB
chr2_17762787_C_T	2	17762787	BOT	[T/C]	AB	BB	BB	AB	BB	AB	AA	AB	AB	AB	AA	AB	AB	AB	AB	AB	BB	AB	BB	BB	AB	AB	AB	AA	AA	BB	BB	AB	AB	AA	AB	AB	AB	BB	BB	BB	BB	AB	AB	AB	AB	AB	BB	AA	BB
chr2_17771152_C_T	2	17771152	TOP	[A/G]	AB	BB	BB	AB	BB	AB	AA	AB	AB	AB	AA	AB	AB	AB	AB	AB	BB	AB	BB	BB	AB	AB	AB	AA	AA	BB	BB	AB	AB	AA	AB	AB	AB	BB	BB	BB	BB	AB	AB	AB	AB	AB	BB	AA	BB
chr2_17772139_A_G	2	17772139	TOP	[A/G]	AA	AA	AA	AA	AA	AA	AA	AA	AA	AA	AA	AA	AA	AA	AA	AA	AA	AA	AA	AA	AA	AA	AA	AA	AA	AA	AA	AA	AA	AA	AA	AA	AA	AA	AA	AA	AA	AA	AA	AA	AA	AA	AA	AA	AA
chr2_17903397_A_C	2	17903397	TOP	[A/C]	BB	BB	BB	BB	BB	BB	BB	BB	BB	BB	BB	BB	BB	BB	BB	BB	BB	BB	BB	BB	BB	BB	BB	BB	BB	BB	BB	BB	BB	BB	BB	BB	BB	BB	BB	NC	BB	BB	BB	BB	BB	BB	BB	BB	BB
chr2_1793393_C_T	2	1793393	BOT	[T/C]	AB	AB	AB	AB	AB	AB	AB	AB	AB	AB	AB	AB	AB	AB	AB	AB	AB	AB	AB	AB	AB	AB	AB	AB	AB	AB	AB	AB	AB	AB	AB	AB	AB	AB	AB	AB	AB	AB	AB	AB	AB	AB	AB	AB	AB
chr2_17960025_A_G	2	17960025	TOP	[A/G]	AB	AA	AA	AB	AA	AB	BB	AB	AB	AB	BB	AB	AB	AB	AB	AB	AA	AB	AA	AA	AB	AB	AB	BB	BB	AA	AA	AB	AB	BB	AB	AB	AB	AA	AA	AA	AA	AB	AB	AB	AB	AB	AB	BB	AA
be_G_A_chr2_18008989	2	18008989	BOT	[T/C]	BB	BB	BB	BB	BB	BB	BB	BB	BB	BB	BB	BB	BB	BB	BB	BB	BB	BB	BB	BB	BB	BB	BB	BB	BB	BB	BB	BB	BB	BB	BB	BB	BB	BB	BB	BB	BB	BB	BB	BB	BB	BB	BB	BB	BB
lb_A_G_chr2_18038748	2	18038748	BOT	[T/C]	AA	AA	AA	AA	AA	AA	AA	AA	AA	AA	AA	AA	AA	AA	AA	AA	AA	AA	AA	AA	AA	AA	AA	AA	AA	AA	AA	AA	AA	AA	AA	AA	AA	AA	AA	AA	AA	AA	AA	AA	AA	AA	AA	AA	AA
chr2_18082219_C_T	2	18082219	BOT	[T/C]	BB	BB	BB	BB	BB	BB	BB	BB	BB	BB	BB	BB	BB	BB	BB	BB	BB	BB	BB	BB	BB	BB	BB	BB	BB	BB	BB	BB	BB	BB	BB	BB	BB	BB	BB	BB	BB	BB	BB	BB	BB	BB	BB	BB	BB
chr2_18096204_C_T	2	18096204	BOT	[T/C]	AB	AA	AA	AB	AA	AB	BB	AB	AB	AB	BB	AB	AB	AB	AB	AB	AA	AB	AA	AA	AB	AB	AB	BB	BB	AA	AA	AB	AB	BB	AB	AB	AB	AA	AA	AA	AA	AB	AB	AB	AB	AB	AB	BB	AA
chr2_18116456_C_T	2	18116456	BOT	[T/C]	BB	BB	BB	BB	BB	BB	BB	BB	BB	BB	BB	BB	BB	BB	BB	BB	BB	BB	BB	BB	BB	BB	BB	BB	BB	BB	BB	BB	BB	BB	BB	BB	BB	BB	BB	BB	BB	BB	BB	BB	BB	BB	BB	BB	BB
li_A_C_chr2_18138447	2	18138447	TOP	[A/C]	AA	AA	AA	AA	AA	AA	AA	AA	AA	AA	AA	AA	AA	AA	AA	AA	AA	AA	AA	AA	AA	AA	AA	AA	AA	AA	AA	AA	AA	AA	AA	AA	AA	AA	AA	AA	AA	AA	AA	AA	AA	AA	AA	AA	AA
chr2_1813865_C_T	2	1813865	BOT	[T/C]	BB	BB	BB	BB	BB	BB	BB	BB	BB	BB	BB	BB	BB	BB	BB	BB	BB	BB	BB	BB	BB	BB	BB	BB	BB	BB	BB	BB	BB	BB	BB	BB	BB	BB	BB	BB	BB	BB	BB	BB	BB	BB	BB	BB	BB
chr2_18145693_G_T	2	18145693	TOP	[A/C]	AB	AA	AA	AB	AA	AB	BB	AB	AB	AB	BB	AB	AB	AB	AB	AB	AA	AB	AA	AA	AB	AB	AB	BB	BB	AA	AA	AB	AB	BB	AB	AB	AB	AA	AA	AA	AA	AB	AB	AB	AB	AB	AB	BB	AA
chr2_18150017_C_T	2	18150017	BOT	[T/C]	AB	BB	BB	AB	BB	AB	AA	AB	AB	AB	AA	AB	AB	AB	AB	AB	BB	AB	BB	BB	AB	AB	AB	AA	AA	BB	BB	AB	AB	AA	AB	AB	AB	BB	BB	BB	BB	AB	AB	AB	AB	AB	AB	AA	BB
chr2_18192295_G_T	2	18192295	BOT	[T/G]	AB	AA	AA	AB	AA	AB	BB	AB	AB	AB	BB	AB	AB	AB	AB	AB	AA	AB	AA	AA	AB	AB	AB	BB	BB	AA	AA	AB	AB	BB	AB	AB	AB	AA	AA	AA	AA	AB	AB	AB	AB	AB	AB	BB	AA
chr2_18212051_A_G	2	18212051	TOP	[A/G]	BB	BB	BB	BB	BB	BB	BB	BB	BB	BB	BB	BB	BB	BB	BB	BB	BB	BB	BB	BB	BB	BB	BB	BB	BB	BB	BB	BB	BB	BB	BB	BB	BB	BB	BB	BB	BB	BB	BB	BB	BB	BB	BB	BB	BB
chr2_18229930_A_C	2	18229930	BOT	[T/G]	BB	BB	BB	BB	BB	BB	BB	BB	BB	BB	BB	BB	BB	BB	BB	BB	BB	BB	BB	BB	BB	BB	BB	BB	BB	BB	BB	BB	BB	BB	BB	BB	BB	BB	BB	BB	BB	BB	BB	BB	BB	BB	BB	BB	BB
chr2_18241571_C_T	2	18241571	BOT	[T/C]	AB	BB	BB	AB	BB	AB	AA	AB	AB	AB	AA	AB	AB	AB	AB	AB	BB	AB	BB	BB	AB	AB	AB	AA	AA	BB	BB	AB	AB	AA	AB	AB	AB	BB	BB	BB	BB	AB	AB	AB	AB	AB	AB	AA	BB
chr2_1826086_A_G	2	1826086	BOT	[T/C]	AA	AA	AA	AA	AA	AA	AA	AA	AA	AA	AA	AA	AA	AA	AA	AA	AA	AA	AA	AA	AA	AA	AA	AA	AA	AA	AA	AA	AA	AA	AA	NC	AA	AA	AA	AA	AA	AA	AA	AA	AA	AA	AA	AA	AA
chr2_18273697_A_G	2	18273697	BOT	[T/C]	AA	AA	AA	AA	AA	AA	AA	AA	AA	AA	AA	AA	AA	AA	AA	AA	AA	AA	AA	AA	AA	AA	AA	AA	AA	AA	AA	AA	AA	AA	AA	AA	AA	AA	AA	AA	AA	AA	AA	AA	AA	AA	AA	AA	AA
mu_s_G_A_chr2_1828529	2	1828529	TOP	[A/G]	BB	BB	BB	BB	BB	BB	BB	BB	BB	BB	BB	BB	BB	BB	BB	BB	BB	BB	BB	BB	BB	BB	BB	BB	BB	BB	BB	BB	BB	BB	BB	BB	BB	BB	BB	BB	BB	BB	BB	BB	BB	BB	BB	BB	BB
chr2_18305755_C_T	2	18305755	BOT	[T/C]	AB	AA	AA	AB	AA	AB	BB	AB	AB	AB	BB	AB	AB	AB	AB	AB	AA	AB	AA	AA	AB	AB	AB	BB	BB	AA	AA	AB	AB	BB	AB	AB	AB	AA	AA	AA	AA	AB	AB	AB	AB	AB	AB	BB	AA
chr2_18336450_A_C	2	18336450	TOP	[A/C]	BB	BB	BB	BB	BB	BB	BB	BB	BB	BB	BB	BB	BB	BB	BB	BB	BB	BB	BB	BB	BB	BB	BB	BB	BB	BB	BB	BB	BB	BB	BB	BB	BB	BB	BB	BB	BB	BB	BB	BB	BB	BB	BB	BB	BB
chr2_18360408_A_G	2	18360408	TOP	[A/G]	AB	AA	AA	AB	AA	AB	BB	AB	AB	AB	BB	AB	AB	AB	AB	AB	AA	AB	AA	AA	AB	AB	AB	BB	BB	AA	AA	AB	AB	BB	AB	AB	AB	AA	AA	AA	AA	AB	AB	AB	AB	AB	AB	BB	AA
chr2_18396759_A_G	2	18396759	TOP	[A/G]	BB	BB	BB	BB	BB	BB	BB	BB	BB	BB	BB	BB	BB	BB	BB	BB	BB	BB	BB	BB	BB	BB	BB	BB	BB	BB	BB	BB	BB	BB	BB	BB	BB	BB	BB	BB	BB	BB	BB	BB	BB	BB	BB	BB	BB
chr2_18400049_C_T	2	18400049	BOT	[T/C]	AB	AA	AA	AB	AA	AB	BB	AB	AB	AB	BB	AB	AB	AB	AB	AB	AA	AB	AA	AA	AB	AB	AB	BB	BB	AA	AA	AB	AB	BB	AB	AB	AB	AA	AA	AA	AA	AB	AB	AB	AB	AB	AB	BB	AA
chr2_18438944_A_G	2	18438944	BOT	[T/C]	BB	BB	BB	BB	BB	BB	BB	BB	BB	BB	BB	BB	BB	BB	BB	BB	BB	BB	BB	BB	BB	BB	BB	BB	BB	BB	BB	BB	BB	BB	BB	BB	BB	BB	BB	BB	BB	BB	BB	BB	BB	BB	BB	BB	BB
chr2_18455249_A_G	2	18455249	BOT	[T/C]	AB	AA	AA	AB	AA	AB	BB	AB	AB	AB	BB	AB	AB	AB	AB	AB	AA	AB	AA	AA	AB	AB	AB	BB	BB	AA	AA	AB	AB	BB	AB	AB	AB	AA	AA	AA	AA	AB	AB	AB	AB	AB	AB	BB	AA
chr2_18456632_C_T	2	18456632	TOP	[A/G]	AB	AA	AA	AB	AA	AB	BB	AB	AB	AB	BB	AB	AB	AB	AB	AB	AA	AB	AA	AA	AB	AB	AB	BB	BB	AA	AA	AB	AB	BB	AB	AB	AB	AA	AA	AA	AA	AB	AB	AB	AB	AB	AB	BB	AA
chr2_18490893_G_T	2	18490893	TOP	[A/C]	AB	AA	AA	AB	AA	AB	BB	AB	AB	AB	BB	AB	AB	AB	AB	AB	AA	AB	AA	AA	AB	AB	AB	BB	BB	AA	AA	AB	AB	BB	AB	AB	AB	AA	AA	AA	AA	AB	AB	AB	AB	AB	AB	BB	AA
be_G_A_chr2_18509169	2	18509169	BOT	[T/C]	BB	BB	BB	BB	BB	BB	BB	BB	BB	BB	BB	BB	BB	BB	BB	BB	BB	BB	BB	BB	BB	BB	BB	BB	BB	BB	BB	BB	BB	BB	BB	BB	BB	BB	BB	BB	BB	BB	BB	BB	BB	BB	BB	BB	BB
chr2_18523796_C_T	2	18523796	BOT	[T/C]	AB	AA	AA	AB	AA	AB	BB	AB	AB	AB	BB	AB	AB	AB	AB	AB	AA	AB	AA	AA	AB	AB	AB	BB	BB	AA	AA	AB	AB	BB	AB	AB	AB	AA	AA	AA	AA	AB	AB	AB	AB	AB	AB	BB	AA
chr2_18524257_A_G	2	18524257	TOP	[A/G]	AB	AA	AA	AB	AA	AB	BB	AB	AB	AB	BB	AB	AB	AB	AB	AB	AA	AB	AA	AA	AB	AB	AB	BB	BB	AA	AA	AB	AB	BB	AB	AB	AB	AA	AA	AA	AA	AB	AB	AB	AB	AB	AB	BB	AA
lb_G_A_chr2_18528511	2	18528511	BOT	[T/C]	BB	BB	BB	BB	BB	BB	BB	BB	BB	BB	BB	BB	BB	BB	BB	BB	BB	BB	BB	BB	BB	BB	BB	BB	BB	BB	BB	BB	BB	BB	BB	BB	BB	BB	BB	BB	BB	BB	BB	BB	BB	BB	BB	BB	BB
ae_A_G_chr2_18533967	2	18533967	BOT	[T/C]	AA	AA	AA	AA	AA	AA	AA	AA	AA	AA	AA	AA	AA	AA	AA	AA	AA	AA	AA	AA	AA	AA	AA	AA	AA	AA	AA	AA	AA	AA	AA	AA	AA	AA	AA	AA	AA	AA	AA	AA	AA	AA	AA	AA	AA
cn_C_T_chr2_18536857	2	18536857	BOT	[T/C]	BB	BB	BB	BB	BB	BB	BB	BB	BB	BB	BB	BB	BB	BB	BB	BB	BB	BB	BB	BB	BB	BB	BB	BB	BB	BB	BB	BB	BB	BB	BB	BB	BB	BB	BB	BB	BB	BB	BB	BB	BB	BB	BB	BB	BB
chr2_18588253_A_G	2	18588253	BOT	[T/C]	BB	BB	BB	BB	BB	BB	BB	BB	BB	BB	BB	BB	BB	BB	BB	BB	BB	BB	BB	BB	BB	BB	BB	BB	BB	BB	BB	BB	BB	BB	BB	BB	BB	BB	BB	BB	BB	BB	BB	BB	BB	BB	BB	BB	BB
chr2_18612075_A_G	2	18612075	TOP	[A/G]	AB	AA	AA	AB	AA	AB	BB	AB	AB	AB	BB	AB	AB	AB	AB	AB	AA	AB	AA	AA	AB	AB	AB	BB	BB	AA	AA	AB	AB	BB	AB	AB	AB	AA	AA	AA	AA	AB	AB	AB	AB	AB	AB	BB	AA
li_T_G_chr2_1879023	2	1879023	TOP	[A/C]	AA	AA	AA	AA	AA	AA	AA	AA	AA	AA	AA	AA	AA	AA	AA	AA	AA	AA	AA	AA	AA	AA	AA	AA	AA	AA	AA	AA	AA	AA	AA	AA	AA	AA	AA	AA	AA	AA	AA	AA	AA	AA	AA	AA	AA
chr2_1886239_A_G	2	1886239	TOP	[A/G]	BB	AB	AB	AA	AB	AA	AB	AB	BB	AB	AB	BB	AB	AA	AB	AB	AB	AA	AB	AB	AB	AB	AA	AB	BB	AA	AB	AB	AB	AB	AB	AB	AA	AB	BB	AA	NC	AB	AA	AB	AB	AB	AA	AB	BB
chr2_1886798_A_G	2	1886798	TOP	[A/G]	AA	AB	AB	BB	AB	BB	AB	AB	AA	NC	AB	AA	AB	NC	AB	AB	AB	BB	AB	AB	AB	AB	BB	AB	AA	BB	AB	AB	AB	AB	AB	AB	BB	AB	AA	BB	AA	AB	BB	AB	AB	AB	BB	AB	AA
chr2_1919608_A_G	2	1919608	BOT	[T/C]	BB	BB	BB	BB	BB	BB	BB	BB	BB	BB	BB	BB	BB	BB	BB	BB	BB	BB	BB	BB	BB	BB	BB	BB	BB	BB	BB	BB	BB	BB	BB	BB	BB	BB	BB	BB	BB	BB	BB	BB	BB	BB	BB	BB	BB
chr2_1951176_A_G	2	1951176	BOT	[T/C]	BB	AB	AB	AA	AB	AA	AB	AB	BB	AB	AB	BB	AB	AA	AB	AB	AB	AA	AB	AB	AB	AB	AA	AB	BB	AA	AB	AB	AB	AB	AB	AB	AA	AB	BB	AA	BB	AB	AA	AB	AB	AB	AA	AB	BB
chr2_196889_A_G	2	196889	TOP	[A/G]	BB	BB	BB	BB	BB	BB	BB	BB	BB	BB	BB	BB	BB	BB	BB	BB	BB	BB	BB	BB	BB	BB	BB	BB	BB	BB	BB	BB	BB	BB	BB	BB	BB	BB	BB	BB	BB	BB	BB	BB	BB	BB	BB	BB	BB
chr2_1970704_C_T	2	1970704	TOP	[A/G]	BB	BB	BB	BB	BB	BB	BB	BB	BB	BB	BB	BB	BB	BB	BB	BB	BB	BB	BB	BB	BB	BB	BB	BB	BB	BB	BB	BB	BB	BB	BB	BB	BB	BB	BB	BB	BB	BB	BB	BB	BB	BB	BB	BB	BB
chr2_2012940_C_T	2	2012940	TOP	[A/G]	AA	AA	AA	AA	AA	AA	AA	AA	AA	AA	AA	AA	AA	AA	AA	AA	AA	AA	AA	AA	AA	AA	AA	AA	AA	AA	AA	AA	AA	AA	AA	AA	AA	AA	AA	AA	AA	AA	AA	AA	AA	AA	AA	AA	AA
chr2_2045907_A_G	2	2045907	BOT	[T/C]	BB	BB	BB	BB	BB	BB	BB	BB	BB	BB	BB	BB	BB	BB	BB	BB	BB	BB	BB	BB	BB	BB	BB	BB	BB	BB	BB	BB	BB	BB	BB	BB	BB	BB	BB	BB	BB	BB	BB	BB	BB	BB	BB	BB	BB
chr2_2074802_A_G	2	2074802	TOP	[A/G]	AA	AB	AB	BB	AB	BB	AB	AB	AA	AB	AB	AA	AB	BB	AB	AB	AB	BB	AB	AB	AB	AB	BB	AB	AA	BB	AB	AB	AB	AB	AB	AB	BB	AB	AA	BB	AA	AB	BB	AB	AB	AB	BB	AB	AA
chr2_2107558_A_G	2	2107558	TOP	[A/G]	BB	BB	BB	BB	BB	BB	BB	BB	BB	BB	BB	BB	BB	BB	BB	BB	BB	BB	BB	BB	BB	BB	BB	BB	BB	BB	BB	BB	BB	BB	BB	BB	BB	BB	BB	BB	BB	BB	BB	BB	BB	BB	BB	BB	BB
chr2_2117505_A_G	2	2117505	TOP	[A/G]	AA	AA	AA	AA	AA	AA	AA	AA	AA	AA	AA	AA	AA	AA	AA	AA	AA	AA	AA	AA	AA	AA	AA	AA	AA	AA	AA	AA	AA	AA	AA	AA	AA	AA	AA	AA	AA	AA	AA	AA	AA	AA	AA	AA	AA
chr2_2123366_A_G	2	2123366	TOP	[A/G]	AA	AA	AA	AA	AA	AA	AA	AA	AA	AA	AA	AA	AA	AA	AA	AA	AA	AA	AA	AA	AA	AA	AA	AA	AA	AA	AA	AA	AA	AA	AA	AA	AA	AA	AA	AA	AA	AA	AA	AA	AA	AA	AA	AA	AA
chr2_2138984_G_T	2	2138984	BOT	[T/G]	AA	AA	AA	AA	AA	AA	AA	AA	AA	AA	AA	AA	AA	AA	AA	AA	AA	AA	AA	AA	AA	AA	AA	AA	AA	AA	AA	AA	AA	AA	AA	AA	AA	AA	AA	AA	AA	AA	AA	AA	AA	AA	AA	AA	AA
chr2_2172483_A_C	2	2172483	TOP	[A/C]	AA	AA	AA	AA	AA	AA	AA	AA	AA	AA	AA	AA	AA	AA	AA	AA	AA	AA	AA	AA	AA	AA	AA	AA	AA	AA	AA	AA	AA	AA	AA	AA	AA	AA	AA	AA	AA	AA	AA	AA	AA	AA	AA	AA	AA
cn_T_G_chr2_2186296	2	2186296	BOT	[T/G]	AA	AA	AA	AA	AA	AA	AA	AA	AA	AA	AA	AA	AA	AA	AA	AA	AA	AA	AA	AA	AA	AA	AA	AA	AA	AA	AA	AA	AA	AA	AA	AA	AA	AA	AA	AA	AA	AA	AA	AA	AA	AA	AA	AA	AA
chr2_2193000_C_T	2	2193000	TOP	[A/G]	AA	AB	AB	BB	AB	BB	AB	AB	AA	AB	AB	AA	AB	NC	AB	AB	AB	BB	AB	AB	AB	AB	BB	AB	AA	BB	AB	AB	AB	AB	AB	AB	BB	AB	AA	BB	AA	AB	BB	AB	AB	AB	BB	AB	AA
ae_T_C_chr2_2215096	2	2215096	TOP	[A/G]	AA	AA	AA	AA	AA	AA	AA	AA	AA	AA	AA	AA	AA	AA	AA	AA	AA	AA	AA	AA	AA	AA	AA	AA	AA	AA	AA	AA	AA	AA	AA	AA	AA	AA	AA	AA	AA	AA	AA	AA	AA	AA	AA	AA	AA
lb_T_C_chr2_2224117	2	2224117	TOP	[A/G]	AA	AA	AA	AA	AA	AA	AA	AA	AA	AA	AA	AA	AA	AA	AA	AA	AA	AA	AA	AA	AA	AA	AA	AA	AA	AA	AA	AA	AA	AA	AA	AA	AA	AA	AA	AA	AA	AA	AA	AA	AA	AA	AA	AA	AA
chr2_2231932_A_G	2	2231932	TOP	[A/G]	BB	BB	BB	BB	BB	BB	BB	BB	BB	BB	BB	BB	BB	BB	BB	BB	BB	BB	BB	BB	BB	BB	BB	BB	BB	BB	BB	BB	BB	BB	BB	BB	BB	BB	BB	BB	BB	BB	BB	BB	BB	BB	BB	BB	BB
chr2_2266506_C_T	2	2266506	TOP	[A/G]	AA	AA	AA	AA	AA	AA	AA	AA	AA	AA	AA	AA	AA	AA	AA	AA	AA	AA	AA	AA	AA	AA	AA	AA	AA	AA	AA	AA	AA	AA	AA	AA	AA	AA	AA	AA	AA	AA	AA	AA	AA	AA	AA	AA	AA
chr2_2294582_A_G	2	2294582	BOT	[T/C]	AA	AA	AA	AA	AA	AA	AA	AA	AA	AA	AA	AA	AA	AA	AA	AA	AA	AA	AA	AA	AA	AA	AA	AA	AA	AA	AA	AA	AA	AA	AA	AA	AA	AA	AA	AA	AA	AA	AA	AA	AA	AA	AA	AA	AA
chr2_2327659_A_G	2	2327659	BOT	[T/C]	AA	AB	AB	BB	AB	BB	AB	AB	AA	AB	AB	AA	AB	NC	AB	AB	AB	BB	AB	AB	AB	AB	BB	AB	AA	BB	AB	AB	AB	AB	AB	AB	BB	AB	AA	BB	AA	AB	BB	AB	AB	AB	BB	AB	AA
chr2_235174_C_T	2	235174	BOT	[T/C]	BB	BB	BB	BB	BB	BB	BB	BB	BB	BB	BB	BB	BB	BB	BB	BB	BB	BB	BB	BB	BB	BB	BB	BB	BB	BB	BB	BB	BB	BB	BB	BB	BB	BB	BB	BB	BB	BB	BB	BB	BB	BB	BB	BB	BB
be_G_A_chr2_235677	2	235677	TOP	[A/G]	BB	BB	BB	BB	BB	BB	BB	BB	BB	BB	BB	BB	BB	BB	BB	BB	BB	BB	BB	BB	BB	BB	BB	BB	BB	BB	BB	BB	BB	BB	BB	BB	BB	BB	BB	BB	BB	BB	BB	BB	BB	BB	BB	BB	BB
chr2_2358066_C_T	2	2358066	BOT	[T/C]	BB	AB	AB	AA	AB	AA	AB	AB	BB	AB	AB	BB	AB	NC	AB	AB	AB	AA	AB	AB	AB	AB	AA	AB	BB	AA	AB	AB	AB	AB	AB	AB	AA	AB	BB	AA	BB	AB	AA	AB	AB	AB	AA	AB	BB
chr2_2387582_A_G	2	2387582	TOP	[A/G]	BB	AB	AB	AA	AB	AA	AB	AB	BB	AB	AB	BB	AB	NC	AB	AB	AB	AA	AB	AB	AB	AB	AA	AB	BB	AA	AB	AB	AB	AB	AB	AB	AA	AB	BB	AA	BB	AB	AA	AB	AB	AB	AA	AB	BB
chr2_2424500_A_G	2	2424500	BOT	[T/C]	BB	BB	BB	BB	BB	BB	BB	BB	BB	BB	BB	BB	BB	BB	BB	BB	BB	BB	BB	BB	BB	BB	BB	BB	BB	BB	BB	BB	BB	BB	BB	NC	BB	BB	BB	BB	BB	BB	BB	BB	BB	BB	BB	BB	BB
chr2_2425720_G_T	2	2425720	TOP	[A/C]	BB	BB	BB	BB	BB	BB	BB	BB	BB	BB	BB	BB	BB	BB	BB	BB	BB	BB	BB	BB	BB	BB	BB	BB	BB	BB	BB	BB	BB	BB	BB	BB	BB	BB	BB	BB	BB	BB	BB	BB	BB	BB	BB	BB	BB
chr2_2450199_C_T	2	2450199	BOT	[T/C]	AA	AA	AA	AA	AA	AA	AA	AA	AA	AA	AA	AA	AA	AA	AA	AA	AA	AA	AA	AA	AA	AA	AA	AA	AA	AA	AA	AA	AA	AA	AA	AA	AA	AA	AA	AA	AA	AA	AA	AA	AA	AA	AA	AA	AA
lb_C_T_chr2_245862	2	245862	TOP	[A/G]	BB	BB	BB	BB	BB	BB	BB	BB	BB	BB	BB	BB	BB	BB	BB	BB	BB	BB	BB	BB	BB	BB	BB	BB	BB	BB	BB	BB	BB	BB	BB	BB	BB	BB	BB	BB	BB	BB	BB	BB	BB	BB	BB	BB	BB
chr2_2486995_C_T	2	2486995	BOT	[T/C]	BB	BB	BB	BB	BB	BB	BB	BB	BB	BB	BB	BB	BB	BB	BB	BB	BB	BB	BB	BB	BB	BB	BB	BB	BB	BB	BB	BB	BB	BB	BB	BB	BB	BB	BB	BB	BB	BB	BB	BB	BB	BB	BB	BB	BB
chr2_2525554_C_T	2	2525554	BOT	[T/C]	AA	AA	AA	AA	AA	AA	AA	AA	AA	AA	AA	AA	AA	AA	AA	AA	AA	AA	AA	AA	AA	AA	AA	AA	AA	AA	AA	AA	AA	AA	AA	AA	AA	AA	AA	AA	AA	AA	AA	AA	AA	AA	AA	AA	AA
chr2_2543419_G_T	2	2543419	TOP	[A/C]	BB	AB	AB	AA	AB	AA	AB	AB	BB	AB	AB	BB	AB	AA	AB	AB	AB	AA	AB	AB	AB	AB	AA	AB	BB	AA	AB	AB	AB	AB	AB	AB	AA	AB	BB	AA	BB	AB	AA	AB	AB	AB	AA	AB	AB
mu_o_A_G_chr2_2562724	2	2562724	TOP	[A/G]	AA	AA	AA	AA	AA	AA	AA	AA	AA	AA	AA	AA	AA	AA	AA	AA	AA	AA	AA	AA	AA	AA	AA	AA	AA	AA	AA	AA	AA	AA	AA	AA	AA	AA	AA	AA	AA	AA	AA	AA	AA	AA	AA	AA	AA
cn_G_A_chr2_257151	2	257151	BOT	[T/C]	BB	BB	BB	BB	BB	BB	BB	BB	BB	BB	BB	BB	BB	BB	BB	BB	BB	BB	BB	BB	BB	BB	BB	BB	BB	BB	BB	BB	BB	BB	BB	BB	BB	BB	BB	BB	BB	BB	BB	BB	BB	BB	BB	BB	BB
chr2_2574744_A_C	2	2574744	TOP	[A/C]	AA	AA	AA	AA	AA	AA	AA	AA	AA	AA	AA	AA	AA	AA	AA	AA	AA	AA	AA	AA	AA	AA	AA	AA	AA	AA	AA	AA	AA	AA	AA	AA	AA	AA	AA	AA	AA	AA	AA	AA	AA	AA	AA	AA	AA
chr2_2579624_A_G	2	2579624	TOP	[A/G]	BB	BB	BB	BB	BB	BB	BB	BB	BB	BB	BB	BB	BB	BB	BB	BB	BB	BB	BB	BB	BB	BB	BB	BB	BB	BB	BB	BB	BB	BB	BB	BB	BB	BB	BB	BB	BB	BB	BB	BB	BB	BB	BB	BB	BB
chr2_2608966_C_T	2	2608966	TOP	[A/G]	AA	AB	AB	BB	AB	BB	AB	AB	AA	AB	AB	AA	AB	BB	AB	AB	AB	BB	AB	AB	AB	AB	BB	AB	AA	BB	AB	AB	AB	AB	AB	AB	BB	AB	AA	BB	AA	AB	BB	AB	AB	AB	BB	AB	AB
ae_T_C_chr2_262262	2	262262	TOP	[A/G]	AA	AA	AA	AA	AA	AA	AA	AA	AA	AA	AA	AA	AA	AA	AA	AA	AA	AA	AA	AA	AA	AA	AA	AA	AA	AA	AA	AA	AA	AA	AA	AA	AA	AA	AA	AA	AA	AA	AA	AA	AA	AA	AA	AA	AA
chr2_2635299_A_G	2	2635299	TOP	[A/G]	AA	AA	AA	AA	AA	AA	AA	AA	AA	AA	AA	AA	AA	AA	AA	AA	AA	AA	AA	AA	AA	AA	AA	AA	AA	AA	AA	AA	AA	AA	AA	AA	AA	AA	AA	AA	AA	AA	AA	AA	AA	AA	AA	AA	AA
mu_s_A_G_chr2_266001	2	266001	TOP	[A/G]	AA	AA	AA	AA	AA	AA	AA	AA	AA	AA	AA	AA	AA	AA	AA	AA	AA	AA	AA	AA	AA	AA	AA	AA	AA	AA	AA	AA	AA	AA	AA	AA	AA	AA	AA	AA	AA	AA	AA	AA	AA	AA	AA	AA	AA
chr2_266133_C_T	2	266133	TOP	[A/G]	AA	AA	AA	AA	AA	AA	AA	AA	AA	AA	AA	AA	AA	AA	AA	AA	AA	AA	AA	AA	AA	AA	AA	AA	AA	AA	AA	AA	AA	AA	AA	AA	AA	AA	AA	AA	AA	AA	AA	AA	AA	AA	AA	AA	AA
chr2_2664548_C_T	2	2664548	BOT	[T/C]	BB	BB	BB	BB	BB	BB	BB	BB	BB	BB	BB	BB	BB	BB	BB	BB	BB	BB	BB	BB	BB	BB	BB	BB	BB	BB	BB	BB	BB	BB	BB	BB	BB	BB	BB	BB	BB	BB	BB	BB	BB	BB	BB	BB	BB
chr2_2665647_A_G	2	2665647	BOT	[T/C]	AA	AA	AA	AA	AA	AA	AA	AA	AA	AA	AA	AA	AA	AA	AA	AA	AA	AA	AA	AA	AA	AA	AA	AA	AA	AA	AA	AA	AA	AA	AA	AA	AA	AA	AA	AA	AA	AA	AA	AA	AA	AA	AA	AA	AA
cn_G_T_chr2_2684277	2	2684277	BOT	[T/G]	BB	BB	BB	BB	BB	BB	BB	BB	BB	BB	BB	BB	BB	BB	BB	BB	BB	BB	BB	BB	BB	BB	BB	BB	BB	BB	BB	BB	BB	BB	BB	BB	BB	BB	BB	BB	BB	BB	BB	BB	BB	BB	BB	BB	BB
chr2_269208_A_G	2	269208	BOT	[T/C]	BB	BB	BB	BB	BB	BB	BB	BB	BB	BB	BB	BB	BB	BB	BB	BB	BB	BB	BB	BB	BB	BB	BB	BB	BB	BB	BB	BB	BB	BB	BB	BB	BB	BB	BB	BB	BB	BB	BB	BB	BB	BB	BB	BB	BB
chr2_2711696_G_T	2	2711696	TOP	[A/C]	AA	AA	AA	AA	AA	AA	AA	AA	AA	AA	AA	AA	AA	AA	AA	AA	AA	AA	AA	AA	AA	AA	AA	AA	AA	AA	AA	AA	AA	AA	AA	AA	AA	AA	AA	AA	AA	AA	AA	AA	AA	AA	AA	AA	AA
lb_A_G_chr2_2717650	2	2717650	TOP	[A/G]	AA	AA	AA	AA	AA	AA	AA	AA	AA	AA	AA	AA	AA	AA	AA	AA	AA	AA	AA	AA	AA	AA	AA	AA	AA	AA	AA	AA	AA	AA	AA	AA	AA	AA	AA	AA	AA	AA	AA	AA	AA	AA	AA	AA	AA
be_C_T_chr2_2720067	2	2720067	TOP	[A/G]	BB	BB	BB	BB	BB	BB	BB	BB	BB	BB	BB	BB	BB	BB	BB	BB	BB	BB	BB	BB	BB	BB	BB	BB	BB	BB	BB	BB	BB	BB	BB	BB	BB	BB	BB	BB	BB	BB	BB	BB	BB	BB	BB	BB	BB
chr2_2733262_A_G	2	2733262	BOT	[T/C]	AA	AA	AA	AA	AA	AA	AA	AA	AA	AA	AA	AA	AA	AA	AA	AA	AA	AA	AA	AA	AA	AA	AA	AA	AA	AA	AA	AA	AA	AA	AA	AA	AA	AA	AA	AA	AA	AA	AA	AA	AA	AA	AA	AA	AA
chr2_2760746_A_G	2	2760746	TOP	[A/G]	BB	AB	AB	AA	AB	AA	AB	AB	BB	AB	AB	BB	AB	AA	AB	AB	AB	AA	AB	AB	AB	AB	AA	AB	BB	AA	AB	AB	AB	AB	AB	AB	AA	AB	BB	AA	BB	AB	AA	AB	AB	AB	AA	AB	AB
chr2_2776308_C_T	2	2776308	BOT	[T/C]	AA	AA	AA	AA	AA	AA	AA	AA	AA	AA	AA	AA	AA	AA	AA	AA	AA	AA	AA	AA	AA	AA	AA	AA	AA	AA	AA	AA	AA	AA	AA	AA	AA	AA	AA	AA	AA	AA	AA	AA	AA	AA	AA	AA	AA
chr2_2811785_C_T	2	2811785	TOP	[A/G]	BB	BB	BB	BB	BB	BB	BB	BB	BB	BB	BB	BB	BB	BB	BB	BB	BB	BB	BB	BB	BB	BB	BB	BB	BB	BB	BB	BB	BB	BB	BB	BB	BB	BB	BB	BB	BB	BB	BB	BB	BB	BB	BB	BB	BB
chr2_2828762_A_G	2	2828762	BOT	[T/C]	AA	AA	AA	AA	AA	AA	AA	AA	AA	AA	AA	AA	AA	AA	AA	AA	AA	AA	AA	AA	AA	AA	AA	AA	AA	AA	AA	AA	AA	AA	AA	AA	AA	AA	AA	AA	AA	AA	AA	AA	AA	AA	AA	AA	AA
chr2_2885855_A_C	2	2885855	TOP	[A/C]	AA	AB	AB	BB	AB	BB	AB	AB	AA	AB	AB	AA	AB	BB	AB	AB	AB	BB	AB	AB	AB	AB	BB	AB	AA	BB	AB	AB	AB	AB	AB	AB	BB	BB	AA	BB	AA	AB	BB	AB	AB	AB	BB	AB	AB
chr2_2888876_C_T	2	2888876	BOT	[T/C]	BB	AB	AB	AA	AB	AA	AB	AB	BB	AB	AB	BB	AB	AA	AB	AB	AB	AA	AB	AB	AB	AB	AA	AB	BB	AA	AB	AB	AB	AB	AB	AB	AA	AA	BB	AA	BB	AB	AA	AB	AB	AB	AA	AB	AB
chr2_2920251_C_T	2	2920251	BOT	[T/C]	BB	AB	AB	AA	AB	AA	AB	AB	BB	AB	AB	BB	AB	NC	AB	AB	AB	AA	AB	AB	AB	AB	AA	AB	BB	AA	AB	AB	AB	AB	AB	AB	AA	AA	BB	AA	BB	AB	AA	AB	AB	AB	AA	AB	AB
chr2_2948635_A_G	2	2948635	TOP	[A/G]	BB	BB	BB	BB	BB	BB	BB	BB	BB	BB	BB	BB	BB	BB	BB	BB	BB	BB	BB	BB	BB	BB	BB	BB	BB	BB	BB	BB	BB	BB	BB	BB	BB	BB	BB	BB	BB	BB	BB	BB	BB	BB	BB	BB	BB
chr2_296224_A_G	2	296224	BOT	[T/C]	AA	AA	AA	AA	AA	AA	AA	AA	AA	AA	AA	AA	AA	AA	AA	AA	AA	AA	AA	AA	AA	AA	AA	AA	AA	AA	AA	AA	AA	AA	AA	NC	AA	AA	AA	AA	AA	AA	AA	AA	AA	AA	AA	AA	AA
chr2_2966286_C_T	2	2966286	TOP	[A/G]	AA	AB	AB	BB	AB	BB	AB	AB	AA	AB	AB	AA	AB	BB	AB	AB	AB	BB	AB	AB	AB	AB	BB	AB	AA	BB	AB	AB	AB	AB	AB	AB	BB	BB	AA	BB	AA	AB	BB	AB	AB	AB	BB	AB	AB
chr2_2981861_A_G	2	2981861	TOP	[A/G]	AA	AA	AA	AA	AA	AA	AA	AA	AA	AA	AA	AA	AA	AA	AA	AA	AA	AA	AA	AA	AA	AA	AA	AA	AA	AA	AA	AA	AA	AA	AA	AA	AA	AA	AA	AA	AA	AA	AA	AA	AA	AA	AA	AA	AA
chr2_3012768_A_G	2	3012768	TOP	[A/G]	BB	BB	BB	BB	BB	BB	BB	BB	BB	BB	BB	BB	BB	BB	BB	BB	BB	BB	BB	BB	BB	BB	BB	BB	BB	BB	BB	BB	BB	BB	BB	BB	BB	BB	BB	BB	BB	BB	BB	BB	BB	BB	BB	BB	BB
chr2_3040529_C_T	2	3040529	BOT	[T/C]	BB	BB	BB	BB	BB	BB	BB	BB	BB	BB	BB	BB	BB	BB	BB	BB	BB	BB	BB	BB	BB	BB	BB	BB	BB	BB	BB	BB	BB	BB	BB	BB	BB	BB	BB	BB	BB	BB	BB	BB	BB	BB	BB	BB	BB
chr2_3106328_A_C	2	3106328	TOP	[A/C]	AA	AA	AA	AA	AA	AA	AA	AA	AA	AA	AA	AA	AA	AA	AA	AA	AA	AA	AA	AA	AA	AA	AA	AA	AA	AA	AA	AA	AA	AA	AA	AA	AA	AA	AA	AA	AA	AA	AA	AA	AA	AA	AA	AA	AA
chr2_3111428_C_T	2	3111428	TOP	[A/G]	BB	BB	BB	BB	BB	BB	BB	BB	BB	BB	BB	BB	BB	BB	BB	BB	BB	BB	BB	BB	BB	BB	BB	BB	BB	BB	BB	BB	BB	BB	BB	BB	BB	BB	BB	BB	BB	BB	BB	BB	BB	BB	BB	BB	BB
chr2_3114978_G_T	2	3114978	TOP	[A/C]	AA	AA	AA	AA	AA	AA	AA	AA	AA	AA	AA	AA	AA	AA	AA	AA	AA	AA	AA	AA	AA	AA	AA	AA	AA	AA	AA	AA	AA	AA	AA	AA	AA	AA	AA	AA	AA	AA	AA	AA	AA	AA	AA	AA	AA
chr2_3122942_G_T	2	3122942	TOP	[A/C]	BB	BB	BB	BB	BB	BB	BB	BB	BB	BB	BB	BB	BB	BB	BB	BB	BB	BB	BB	BB	BB	BB	BB	BB	BB	BB	BB	BB	BB	BB	BB	BB	BB	BB	BB	BB	BB	BB	BB	BB	BB	BB	BB	BB	BB
li_A_G_chr2_3123390	2	3123390	BOT	[T/C]	AA	AA	AA	AA	AA	AA	AA	AA	AA	AA	AA	AA	AA	AA	AA	AA	AA	AA	AA	AA	AA	AA	AA	AA	AA	AA	AA	AA	AA	AA	AA	AA	AA	AA	AA	AA	AA	AA	AA	AA	AA	AA	AA	AA	AA
chr2_3134968_A_G	2	3134968	BOT	[T/C]	AA	AA	AA	AA	AA	AA	AA	AA	AA	AA	AA	AA	AA	AA	AA	AA	AA	AA	AA	AA	AA	AA	AA	AA	AA	AA	AA	AA	AA	AA	AA	AA	AA	AA	AA	AA	AA	AA	AA	AA	AA	AA	AA	AA	AA
ae_G_A_chr2_3173947	2	3173947	BOT	[T/C]	BB	BB	BB	BB	BB	BB	BB	BB	BB	BB	BB	BB	BB	BB	BB	BB	BB	BB	BB	BB	BB	BB	BB	BB	BB	BB	BB	BB	BB	BB	BB	BB	BB	BB	BB	BB	BB	BB	BB	BB	BB	BB	BB	BB	BB
chr2_3196395_A_G	2	3196395	BOT	[T/C]	BB	BB	BB	BB	BB	BB	BB	BB	BB	BB	BB	BB	BB	BB	BB	BB	BB	BB	BB	BB	BB	BB	BB	BB	BB	BB	BB	BB	BB	BB	BB	BB	BB	BB	BB	BB	BB	BB	BB	BB	BB	BB	BB	BB	BB
chr2_3200605_C_T	2	3200605	BOT	[T/C]	AA	AB	AB	BB	AB	BB	AB	AB	AA	AB	AB	AA	AB	NC	AB	AB	AB	BB	AB	AB	AB	AB	BB	AB	AA	BB	AB	AB	AB	AB	AB	AB	BB	BB	AA	BB	AA	AB	BB	AB	AB	AB	BB	AB	AB
be_G_T_chr2_3200857	2	3200857	BOT	[T/G]	BB	BB	BB	BB	BB	BB	BB	BB	BB	BB	BB	BB	BB	BB	BB	BB	BB	BB	BB	BB	BB	BB	BB	BB	BB	BB	BB	BB	BB	BB	BB	BB	BB	BB	BB	BB	BB	BB	BB	BB	BB	BB	BB	BB	BB
cn_C_T_chr2_3211189	2	3211189	TOP	[A/G]	BB	BB	BB	BB	BB	BB	BB	BB	BB	BB	BB	BB	BB	BB	BB	BB	BB	BB	BB	BB	BB	BB	BB	BB	BB	BB	BB	BB	BB	BB	BB	BB	BB	BB	BB	BB	BB	BB	BB	BB	BB	BB	BB	BB	BB
chr2_3261185_C_T	2	3261185	BOT	[T/C]	BB	BB	BB	BB	BB	BB	BB	BB	BB	BB	BB	BB	BB	BB	BB	BB	BB	BB	BB	BB	BB	BB	BB	BB	BB	BB	BB	BB	BB	BB	BB	BB	BB	BB	BB	BB	BB	BB	BB	BB	BB	BB	BB	BB	BB
chr2_3274648_A_G	2	3274648	TOP	[A/G]	BB	BB	BB	BB	BB	BB	BB	BB	BB	BB	BB	BB	BB	BB	BB	BB	BB	BB	BB	BB	BB	BB	BB	BB	BB	BB	BB	BB	BB	BB	BB	BB	BB	BB	BB	BB	BB	BB	BB	BB	BB	BB	BB	BB	BB
chr2_328553_A_G	2	328553	BOT	[T/C]	BB	BB	BB	BB	BB	BB	BB	BB	BB	BB	BB	BB	BB	BB	BB	BB	BB	BB	BB	BB	BB	BB	BB	BB	BB	BB	BB	BB	BB	BB	BB	BB	BB	BB	BB	BB	BB	BB	BB	BB	BB	BB	BB	BB	BB
chr2_3291471_A_G	2	3291471	TOP	[A/G]	AA	AB	AB	BB	AB	BB	AB	AB	AA	AB	AB	AA	AB	BB	AB	AB	AB	BB	AB	AB	AB	BB	BB	AB	AA	BB	AB	AB	AB	AB	AB	AB	BB	BB	AA	BB	AA	AB	BB	AB	AB	AB	BB	AB	AB
chr2_3455664_A_G	2	3455664	BOT	[T/C]	BB	BB	BB	BB	BB	BB	BB	BB	BB	BB	BB	BB	BB	BB	BB	BB	BB	BB	BB	BB	BB	BB	BB	BB	BB	BB	BB	BB	BB	BB	BB	BB	BB	BB	BB	BB	BB	BB	BB	BB	BB	BB	BB	BB	BB
chr2_3457712_C_T	2	3457712	TOP	[A/G]	AA	AB	AB	BB	AB	BB	AB	AB	AA	AB	AB	AA	AB	NC	AB	AB	AB	BB	AB	AB	AB	BB	BB	AB	AA	BB	AB	AB	AB	AB	AB	AB	BB	BB	AA	BB	AA	AB	BB	AB	AB	AB	BB	AB	AB
chr2_3479229_C_T	2	3479229	BOT	[T/C]	AA	AB	AB	BB	AB	BB	AB	AB	AA	AB	AB	AA	AB	NC	AB	AB	AB	BB	AB	AB	AB	BB	BB	AB	AA	BB	AB	AB	AB	AB	AB	AB	BB	BB	AA	BB	AA	AB	BB	AB	AB	AB	BB	AB	AB
chr2_349619_A_G	2	349619	TOP	[A/G]	BB	BB	BB	BB	BB	BB	BB	BB	BB	BB	BB	BB	BB	BB	BB	BB	BB	BB	BB	BB	BB	BB	BB	BB	BB	BB	BB	BB	BB	BB	BB	NC	BB	BB	BB	BB	BB	BB	BB	BB	BB	BB	BB	BB	BB
chr2_3510009_A_C	2	3510009	TOP	[A/C]	AA	AA	AA	AA	AA	AA	AA	AA	AA	AA	AA	AA	AA	AA	AA	AA	AA	AA	AA	AA	AA	AA	AA	AA	AA	AA	AA	AA	AA	AA	AA	AA	AA	AA	AA	AA	AA	AA	AA	AA	AA	AA	AA	AA	AA
chr2_3511534_A_C	2	3511534	TOP	[A/C]	AA	AA	AA	AA	AA	AA	AA	AA	AA	AA	AA	AA	AA	AA	AA	AA	AA	AA	AA	AA	AA	AA	AA	AA	AA	AA	AA	AA	AA	AA	AA	AA	AA	AA	AA	AA	AA	AA	AA	AA	AA	AA	AA	AA	AA
chr2_3572168_C_T	2	3572168	TOP	[A/G]	AA	AA	AA	AA	AA	AA	AA	AA	AA	AA	AA	AA	AA	AA	AA	AA	AA	AA	AA	AA	AA	AA	AA	AA	AA	AA	AA	AA	AA	AA	AA	AA	AA	AA	AA	AA	AA	AA	AA	AA	AA	AA	AA	AA	AA
chr2_3583487_C_T	2	3583487	BOT	[T/C]	BB	BB	BB	BB	BB	BB	BB	BB	BB	BB	BB	BB	BB	BB	BB	BB	BB	BB	BB	BB	BB	BB	BB	BB	BB	BB	BB	BB	BB	BB	BB	BB	BB	BB	BB	BB	BB	BB	BB	BB	BB	BB	BB	BB	BB
chr2_358571_A_G	2	358571	BOT	[T/C]	AA	AA	AA	AA	AA	AA	AA	AA	AA	AA	AA	AA	AA	AA	AA	AA	AA	AA	AA	AA	AA	AA	AA	AA	AA	AA	AA	AA	AA	AA	AA	AA	AA	AA	AA	AA	AA	AA	AA	AA	AA	AA	AA	AA	AA
chr2_3604524_G_T	2	3604524	TOP	[A/C]	BB	BB	BB	BB	BB	BB	BB	BB	BB	BB	BB	BB	BB	BB	BB	BB	BB	BB	BB	BB	BB	BB	BB	BB	BB	BB	BB	BB	BB	BB	BB	BB	BB	BB	BB	BB	BB	BB	BB	BB	BB	BB	BB	BB	BB
chr2_3636589_C_T	2	3636589	TOP	[A/G]	AA	AA	AA	AA	AA	AA	AA	AA	AA	AA	AA	AA	AA	AA	AA	AA	AA	AA	AA	AA	AA	AA	AA	AA	AA	AA	AA	AA	AA	AA	AA	NC	AA	AA	AA	AA	AA	AA	AA	AA	AA	AA	AA	AA	AA
chr2_3663590_C_T	2	3663590	BOT	[T/C]	AA	AA	AA	AA	AA	AA	AA	AA	AA	AA	AA	AA	AA	AA	AA	AA	AA	AA	AA	AA	AA	AA	AA	AA	AA	AA	AA	AA	AA	AA	AA	AA	AA	AA	AA	AA	AA	AA	AA	AA	AA	AA	AA	AA	AA
chr2_3701523_G_T	2	3701523	TOP	[A/C]	BB	BB	BB	BB	BB	BB	BB	BB	BB	BB	BB	BB	BB	BB	BB	BB	BB	BB	BB	BB	BB	BB	BB	BB	BB	BB	BB	BB	BB	BB	BB	BB	BB	BB	BB	BB	BB	BB	BB	BB	BB	BB	BB	BB	BB
lb_A_G_chr2_3706502	2	3706502	TOP	[A/G]	AA	AA	AA	AA	AA	AA	AA	AA	AA	AA	AA	AA	AA	AA	AA	AA	AA	AA	AA	AA	AA	AA	AA	AA	AA	AA	AA	AA	AA	AA	AA	AA	AA	AA	AA	AA	AA	AA	AA	AA	AA	AA	AA	AA	AA
SNP437_129	2	3709389	TOP	[A/G]	AA	AA	AA	AA	AA	AA	AA	AA	AA	AA	AA	AA	AA	AA	AA	AA	AA	AA	AA	AA	AA	AA	AA	AA	AA	AA	AA	AA	AA	AA	AA	AA	AA	AA	AA	AA	AA	AA	AA	AA	AA	AA	AA	AA	AA
chr2_3730149_A_C	2	3730149	TOP	[A/C]	BB	BB	BB	BB	BB	BB	BB	BB	BB	BB	BB	BB	BB	BB	BB	BB	BB	BB	BB	BB	BB	BB	BB	BB	BB	BB	BB	BB	BB	BB	BB	NC	BB	BB	BB	BB	BB	BB	BB	BB	BB	BB	BB	BB	BB
chr2_3737939_C_T	2	3737939	BOT	[T/C]	AA	AA	AA	AA	AA	AA	AA	AA	AA	AA	AA	AA	AA	AA	AA	AA	AA	AA	AA	AA	AA	AA	AA	AA	AA	AA	AA	AA	AA	AA	AA	AA	AA	AA	AA	AA	AA	AA	AA	AA	AA	AA	AA	AA	AA
be_C_T_chr2_3738448	2	3738448	BOT	[T/C]	BB	BB	BB	BB	BB	BB	BB	BB	BB	BB	BB	BB	BB	BB	BB	BB	BB	BB	BB	BB	BB	BB	BB	BB	BB	BB	BB	BB	BB	BB	BB	BB	BB	BB	BB	BB	BB	BB	BB	BB	BB	BB	BB	BB	BB
chr2_3744081_C_T	2	3744081	BOT	[T/C]	BB	AB	AB	AA	AB	AA	AB	AB	BB	AB	AB	BB	AB	AA	AB	AB	AB	AA	AB	AB	AB	AA	AA	AB	BB	AA	AB	AB	AB	AB	AB	AB	AA	AA	AB	AA	AB	AB	AA	AB	AB	AB	AA	AB	AB
chr2_3805481_G_T	2	3805481	BOT	[T/G]	BB	BB	BB	BB	BB	BB	BB	BB	BB	BB	BB	BB	BB	BB	BB	BB	BB	BB	BB	BB	BB	BB	BB	BB	BB	BB	BB	BB	BB	BB	BB	BB	BB	BB	BB	BB	BB	BB	BB	BB	BB	BB	BB	BB	BB
chr2_381365_A_G	2	381365	BOT	[T/C]	BB	BB	BB	BB	BB	BB	BB	BB	BB	BB	BB	BB	BB	BB	BB	BB	BB	BB	BB	BB	BB	BB	BB	BB	BB	BB	BB	BB	BB	BB	BB	BB	BB	BB	BB	BB	BB	BB	BB	BB	BB	BB	BB	BB	BB
chr2_3816514_A_G	2	3816514	TOP	[A/G]	BB	AB	AB	AA	AB	AA	AB	AB	BB	AB	AB	BB	AB	AA	AB	AB	AB	AA	AB	AB	AB	AA	AA	AB	BB	AA	AB	AB	AB	AB	AB	AB	AA	AA	AB	AA	AB	AB	AA	AB	AB	AB	AA	AB	AB
chr2_3816583_C_T	2	3816583	BOT	[T/C]	BB	BB	BB	BB	BB	BB	BB	BB	BB	BB	BB	BB	BB	BB	BB	BB	BB	BB	BB	BB	BB	BB	BB	BB	BB	BB	BB	BB	BB	BB	BB	BB	BB	BB	BB	BB	BB	BB	BB	BB	BB	BB	BB	BB	BB
chr2_3854552_G_T	2	3854552	BOT	[T/G]	BB	BB	BB	BB	BB	BB	BB	BB	BB	BB	BB	BB	BB	BB	BB	BB	BB	BB	BB	BB	BB	BB	BB	BB	BB	BB	BB	BB	BB	BB	BB	BB	BB	BB	BB	BB	BB	BB	BB	BB	BB	BB	BB	BB	BB
mu_s_A_G_chr2_3864258	2	3864258	TOP	[A/G]	AA	AA	AA	AA	AA	AA	AA	AA	AA	AA	AA	AA	AA	AA	AA	AA	AA	AA	AA	AA	AA	AA	AA	AA	AA	AA	AA	AA	AA	AA	AA	AA	AA	AA	AA	AA	AA	AA	AA	AA	AA	AA	AA	AA	AA
chr2_3884541_A_G	2	3884541	TOP	[A/G]	AA	AB	AB	BB	AB	BB	AB	AB	AA	AB	AB	AA	AB	NC	AB	AB	AB	BB	BB	AB	AB	BB	BB	AB	AA	BB	AB	AB	AB	AB	AB	AB	BB	BB	AB	BB	AB	AB	BB	AB	AB	AB	BB	AB	AB
chr2_3926249_A_C	2	3926249	TOP	[A/C]	AA	AB	AB	BB	AB	BB	AB	AB	AA	AB	AB	AA	AB	NC	AB	AB	AB	BB	BB	AB	AB	BB	BB	AB	AA	BB	AB	AB	AB	AB	AB	AB	BB	BB	AB	BB	AB	AB	BB	AB	AB	AB	BB	AB	AB
chr2_39272_C_T	2	39272	BOT	[T/C]	AB	AB	BB	AB	BB	BB	AB	AB	AA	AB	AB	AA	AB	NC	AB	AB	AB	BB	BB	AB	AB	BB	BB	AA	AA	BB	AB	AB	AB	AA	AB	NC	AB	BB	AB	BB	AB	AA	BB	AB	AB	AB	BB	AA	BB
chr2_3948069_C_T	2	3948069	BOT	[T/C]	AA	AA	AA	AA	AA	AA	AA	AA	AA	AA	AA	AA	AA	AA	AA	AA	AA	AA	AA	AA	AA	AA	AA	AA	AA	AA	AA	AA	AA	AA	AA	AA	AA	AA	AA	AA	AA	AA	AA	AA	AA	AA	AA	AA	AA
chr2_3979499_G_T	2	3979499	TOP	[A/C]	BB	AB	AB	AA	AB	AA	AB	AB	BB	AB	AB	BB	AB	AA	AB	AB	AB	AA	AA	AB	AB	AA	AA	AB	BB	AA	AB	AB	AB	AB	AB	AB	AA	AA	AB	AA	AB	AB	AA	AB	AB	AB	AA	AB	AB
chr2_3980332_A_C	2	3980332	BOT	[T/G]	AA	AB	AB	BB	AB	BB	AB	AB	AA	AB	AB	AA	AB	BB	AB	AB	AB	BB	BB	AB	AB	BB	BB	AB	AA	BB	AB	AB	AB	AB	AB	AB	BB	BB	AB	BB	AB	AB	BB	AB	AB	AB	BB	AB	AB
chr2_4014240_A_G	2	4014240	TOP	[A/G]	AA	AB	AB	BB	AB	BB	AB	AB	AA	AB	AB	AA	AB	NC	AB	AB	AB	BB	BB	AB	AB	BB	BB	AB	AA	BB	AB	AB	AB	AB	AB	AB	BB	BB	AB	BB	AB	AB	BB	AB	AB	AB	BB	AB	AB
chr2_4041762_C_T	2	4041762	TOP	[A/G]	AA	AB	AB	BB	AB	BB	AB	AB	AA	AB	AB	AA	AB	BB	AB	AB	AB	BB	BB	AB	AB	BB	BB	AB	AA	BB	AB	AB	AB	AB	AB	AB	BB	BB	AB	BB	AB	AB	BB	AB	AB	AB	BB	AB	AB
chr2_4046046_A_G	2	4046046	TOP	[A/G]	BB	BB	BB	BB	BB	BB	BB	BB	BB	BB	BB	BB	BB	BB	BB	BB	BB	BB	BB	BB	BB	BB	BB	BB	BB	BB	BB	BB	BB	BB	BB	BB	BB	BB	BB	BB	BB	BB	BB	BB	BB	BB	BB	BB	BB
chr2_4067972_A_G	2	4067972	TOP	[A/G]	BB	AB	AB	AA	AB	AA	AB	AB	BB	AB	AB	BB	AB	NC	AB	AB	AB	AA	AA	AB	AB	AA	AA	AB	BB	AA	AB	AB	AB	AB	AB	AB	AA	AA	AB	AA	AB	AB	AA	AB	AB	AB	AA	AB	AB
chr2_4083041_C_T	2	4083041	BOT	[T/C]	BB	BB	BB	BB	BB	BB	BB	BB	BB	BB	BB	BB	BB	BB	BB	BB	BB	BB	BB	BB	BB	BB	BB	BB	BB	BB	BB	BB	BB	BB	BB	BB	BB	BB	BB	BB	BB	BB	BB	BB	BB	BB	BB	BB	BB
chr2_4101743_C_T	2	4101743	BOT	[T/C]	BB	AB	AB	AA	AB	AA	AB	AB	BB	AB	AB	BB	AB	AA	AB	AB	AB	AA	AA	AB	AB	AA	AA	AB	BB	AA	AB	AB	AB	AB	AB	AB	AA	AA	AB	AA	AB	AB	AA	AB	AB	AB	AA	AB	AB
chr2_4122634_C_T	2	4122634	BOT	[T/C]	BB	BB	BB	BB	BB	BB	BB	BB	BB	BB	BB	BB	BB	BB	BB	BB	BB	BB	BB	BB	BB	BB	BB	BB	BB	BB	BB	BB	BB	BB	BB	BB	BB	BB	BB	BB	BB	BB	BB	BB	BB	BB	BB	BB	BB
chr2_4137690_A_G	2	4137690	TOP	[A/G]	AA	AA	AA	AA	AA	AA	AA	AA	AA	AA	AA	AA	AA	AA	AA	AA	AA	AA	AA	AA	AA	AA	AA	AA	AA	AA	AA	AA	AA	AA	AA	AA	AA	AA	AA	AA	AA	AA	AA	AA	AA	AA	AA	AA	AA
chr2_4166541_A_G	2	4166541	BOT	[T/C]	BB	AB	AB	AA	AB	AA	AB	AB	BB	AB	AB	BB	AB	NC	AB	AB	AB	AA	AA	AB	AB	AA	AA	AB	BB	AA	AB	AB	AB	AB	AB	AB	AA	AA	AB	AA	AB	AB	AA	AB	AB	AB	AA	AB	AA
cn_A_C_chr2_4166831	2	4166831	TOP	[A/C]	AA	AA	AA	AA	AA	AA	AA	AA	AA	AA	AA	AA	AA	AA	AA	AA	AA	AA	AA	AA	AA	AA	AA	AA	AA	AA	AA	AA	AA	AA	AA	AA	AA	AA	AA	AA	AA	AA	AA	AA	AA	AA	AA	AA	AA
be_G_T_chr2_4192333	2	4192333	BOT	[T/G]	BB	BB	BB	BB	BB	BB	BB	BB	BB	BB	BB	BB	BB	BB	BB	BB	BB	BB	BB	BB	BB	BB	BB	BB	BB	BB	BB	BB	BB	BB	BB	BB	BB	BB	BB	BB	BB	BB	BB	BB	BB	BB	BB	BB	BB
chr2_4199150_C_T	2	4199150	TOP	[A/G]	BB	BB	BB	BB	BB	BB	BB	BB	BB	BB	BB	BB	BB	BB	BB	BB	BB	BB	BB	BB	BB	BB	BB	BB	BB	BB	BB	BB	BB	BB	BB	BB	BB	BB	BB	BB	BB	BB	BB	BB	BB	BB	BB	BB	BB
chr2_4199795_A_G	2	4199795	TOP	[A/G]	BB	BB	BB	BB	BB	BB	BB	BB	BB	BB	BB	BB	BB	BB	BB	BB	BB	BB	BB	BB	BB	BB	BB	BB	BB	BB	BB	BB	BB	BB	BB	BB	BB	BB	BB	BB	BB	BB	BB	BB	BB	BB	BB	BB	BB
lb_C_T_chr2_4200135	2	4200135	BOT	[T/C]	BB	BB	BB	BB	BB	BB	BB	BB	BB	BB	BB	BB	BB	BB	BB	BB	BB	BB	BB	BB	BB	BB	BB	BB	BB	BB	BB	BB	BB	BB	BB	BB	BB	BB	BB	BB	BB	BB	BB	BB	BB	BB	BB	BB	BB
ae_C_T_chr2_4207091	2	4207091	TOP	[A/G]	BB	BB	BB	BB	BB	BB	BB	BB	BB	BB	BB	BB	BB	BB	BB	BB	BB	BB	BB	BB	BB	BB	BB	BB	BB	BB	BB	BB	BB	BB	BB	BB	BB	BB	BB	BB	BB	BB	BB	BB	BB	BB	BB	BB	BB
chr2_4227007_A_G	2	4227007	BOT	[T/C]	BB	BB	BB	BB	BB	BB	BB	BB	BB	BB	BB	BB	BB	BB	BB	BB	BB	BB	BB	BB	BB	BB	BB	BB	BB	BB	BB	BB	BB	BB	BB	BB	BB	BB	BB	BB	BB	BB	BB	BB	BB	BB	BB	BB	BB
chr2_422927_C_T	2	422927	TOP	[A/G]	BB	BB	BB	BB	BB	BB	BB	BB	BB	BB	BB	BB	BB	BB	BB	BB	BB	BB	BB	BB	BB	BB	BB	BB	BB	BB	BB	BB	BB	BB	BB	NC	BB	BB	BB	BB	BB	BB	BB	BB	BB	BB	BB	BB	BB
chr2_424424_A_G	2	424424	TOP	[A/G]	BB	BB	BB	BB	BB	BB	BB	BB	BB	BB	BB	BB	BB	BB	BB	BB	BB	BB	BB	BB	BB	BB	BB	BB	BB	BB	BB	BB	BB	BB	BB	BB	BB	BB	BB	BB	BB	BB	BB	BB	BB	BB	BB	BB	BB
chr2_4256659_A_G	2	4256659	TOP	[A/G]	BB	BB	BB	BB	BB	BB	BB	BB	BB	BB	BB	BB	BB	BB	BB	BB	BB	BB	BB	BB	BB	BB	BB	BB	BB	BB	BB	BB	BB	BB	BB	BB	BB	BB	BB	BB	BB	BB	BB	BB	BB	BB	BB	BB	BB
chr2_4290688_G_T	2	4290688	BOT	[T/G]	AA	AB	AB	BB	AB	BB	AB	AB	AA	AB	AB	AA	AB	BB	AB	AB	AB	BB	BB	AB	AB	BB	BB	AB	AA	BB	AB	AB	AB	AB	AB	BB	BB	BB	AB	BB	AB	AB	BB	AB	AB	AB	BB	AB	BB
chr2_4322402_A_C	2	4322402	BOT	[T/G]	BB	BB	BB	BB	BB	BB	BB	BB	BB	BB	BB	BB	BB	BB	BB	BB	BB	BB	BB	BB	BB	BB	BB	BB	BB	BB	BB	BB	BB	BB	BB	BB	BB	BB	BB	BB	BB	BB	BB	BB	BB	BB	BB	BB	BB
chr2_4353927_A_C	2	4353927	BOT	[T/G]	AA	AA	AA	AA	AA	AA	AA	AA	AA	AA	AA	AA	AA	AA	AA	AA	AA	AA	AA	AA	AA	AA	AA	AA	AA	AA	AA	AA	AA	AA	AA	AA	AA	AA	AA	AA	AA	AA	AA	AA	AA	AA	AA	AA	AA
chr2_4354560_G_T	2	4354560	BOT	[T/G]	AA	AB	AB	BB	AB	BB	AB	AB	AA	AB	AB	AA	AB	BB	AB	AB	AB	BB	BB	AB	AB	BB	BB	AB	AA	BB	AB	AB	AB	AB	AB	BB	BB	BB	AB	BB	AB	AB	BB	AB	AB	AB	BB	AB	BB
chr2_4371560_G_T	2	4371560	BOT	[T/G]	BB	AB	AB	AA	AB	AA	AB	AB	BB	AB	AB	BB	AB	NC	AB	AB	AB	AA	AA	AB	AB	AA	AA	AB	BB	AA	AB	AB	AB	AB	AB	AA	AA	AA	AB	AA	AB	AB	AA	AB	AB	AB	AA	AB	AA
li_T_C_chr2_4380137	2	4380137	BOT	[T/C]	AA	AA	AA	AA	AA	AA	AA	AA	AA	AA	AA	AA	AA	AA	AA	AA	AA	AA	AA	AA	AA	AA	AA	AA	AA	AA	AA	AA	AA	AA	AA	AA	AA	AA	AA	AA	AA	AA	AA	AA	AA	AA	AA	AA	AA
chr2_4416953_A_G	2	4416953	BOT	[T/C]	AA	AB	AB	BB	AB	BB	AB	AB	AA	AB	AB	AA	AB	NC	AB	AB	AB	BB	BB	AB	AB	BB	BB	AB	AA	BB	AB	AB	AB	AB	AB	BB	BB	BB	AB	BB	AB	AB	BB	AB	AB	AB	BB	AB	BB
SNP293_20	2	4425889	BOT	[T/G]	AA	AA	AA	AA	AA	AA	AA	AA	AA	AA	AA	AA	AA	AA	AA	AA	AA	AA	AA	AA	AA	AA	AA	AA	AA	AA	AA	AA	AA	AA	AA	AA	AA	AA	AA	AA	AA	AA	AA	AA	AA	AA	AA	AA	AA
chr2_4431200_A_G	2	4431200	BOT	[T/C]	BB	BB	BB	BB	BB	BB	BB	BB	BB	BB	BB	BB	BB	BB	BB	BB	BB	BB	BB	BB	BB	BB	BB	BB	BB	BB	BB	BB	BB	BB	BB	BB	BB	BB	BB	BB	BB	BB	BB	BB	BB	BB	BB	BB	BB
chr2_4504565_C_T	2	4504565	BOT	[T/C]	AA	AB	AB	BB	AB	BB	AB	AB	AA	AB	AB	AA	AB	BB	AB	AB	AB	BB	BB	AB	AB	BB	BB	AB	AA	BB	AB	AB	AB	AB	AB	NC	BB	BB	AB	BB	AB	AB	BB	AB	AB	AB	BB	AB	BB
chr2_4510461_A_C	2	4510461	BOT	[T/G]	AA	AA	AA	AA	AA	AA	AA	AA	AA	AA	AA	AA	AA	AA	AA	AA	AA	AA	AA	AA	AA	AA	AA	AA	AA	AA	AA	AA	AA	AA	AA	AA	AA	AA	AA	AA	AA	AA	AA	AA	AA	AA	AA	AA	AA
chr2_453380_A_G	2	453380	TOP	[A/G]	AA	AA	AA	AA	AA	AA	AA	AA	AA	AA	AA	AA	AA	AA	AA	AA	AA	AA	AA	AA	AA	AA	AA	AA	AA	AA	AA	AA	AA	AA	AA	AA	AA	AA	AA	AA	AA	AA	AA	AA	AA	AA	AA	AA	AA
chr2_4572698_A_C	2	4572698	TOP	[A/C]	AA	AB	AB	BB	AB	BB	AB	AB	AA	AB	AB	AA	AB	BB	AB	AB	AB	BB	BB	AB	AB	BB	BB	AB	AA	BB	AB	AB	AB	AB	AB	BB	BB	BB	AB	BB	AB	AB	BB	AB	AB	AB	BB	AB	BB
chr2_4587514_A_C	2	4587514	BOT	[T/G]	AA	AB	AB	BB	AB	BB	AB	AB	AA	AB	AB	AA	AB	NC	AB	AB	AB	BB	BB	AB	AB	BB	BB	AB	AA	BB	AB	AB	AB	AB	AB	NC	BB	BB	AB	BB	AB	AB	BB	AB	AB	AB	BB	AB	BB
chr2_4603854_A_G	2	4603854	BOT	[T/C]	AA	AB	AB	BB	AB	BB	AB	AB	AA	AB	AB	AA	AB	BB	AB	AB	AB	BB	BB	AB	AB	BB	BB	AB	AA	BB	AB	AB	AB	AB	AB	BB	BB	BB	AB	BB	AB	AB	BB	AB	AB	AB	BB	AB	BB
cn_T_C_chr2_4633050	2	4633050	BOT	[T/C]	AA	AA	AA	AA	AA	AA	AA	AA	AA	AA	AA	AA	AA	AA	AA	AA	AA	AA	AA	AA	AA	AA	AA	AA	AA	AA	AA	AA	AA	AA	AA	AA	AA	AA	AA	AA	AA	AA	AA	AA	AA	AA	AA	AA	AA
chr2_4635464_A_G	2	4635464	BOT	[T/C]	AA	AB	AB	BB	AB	BB	AB	AB	AA	AB	AB	AA	AB	BB	AB	AB	AB	BB	BB	AB	AB	BB	BB	AB	AA	BB	AB	AB	AB	AB	AB	BB	BB	BB	AB	BB	AB	AB	BB	AB	AB	AB	BB	AB	BB
chr2_4641574_C_T	2	4641574	BOT	[T/C]	BB	AB	AB	AA	AB	AA	AB	AB	BB	AB	AB	BB	AB	AA	AB	AB	AB	AA	AA	AB	AB	AA	AA	AB	BB	AA	AB	AB	AB	AB	AB	NC	AA	AA	AB	AA	AB	AB	AA	AB	AB	AB	AA	AB	AA
chr2_46846_A_C	2	46846	BOT	[T/G]	AA	AA	AA	AA	AA	AA	AA	AA	AA	AA	AA	AA	AA	AA	AA	AA	AA	AA	AA	AA	AA	AA	AA	AA	AA	AA	AA	AA	AA	AA	AA	AA	AA	AA	AA	AA	AA	AA	AA	AA	AA	AA	AA	AA	AA
chr2_4696838_A_C	2	4696838	TOP	[A/C]	BB	AB	AB	AA	AB	AA	AB	AB	BB	AB	AB	BB	AB	AA	AB	AB	AB	AA	AA	AB	AB	AA	AA	AB	BB	AA	AB	AB	AB	AB	AB	AA	AA	AA	AB	AA	AB	AB	AA	AB	AB	AB	AA	BB	AA
ae_G_A_chr2_4715740	2	4715740	BOT	[T/C]	BB	BB	BB	BB	BB	BB	BB	BB	BB	BB	BB	BB	BB	BB	BB	BB	BB	BB	BB	BB	BB	BB	BB	BB	BB	BB	BB	BB	BB	BB	BB	BB	BB	BB	BB	BB	BB	BB	BB	BB	BB	BB	BB	BB	BB
chr2_4732593_A_C	2	4732593	BOT	[T/G]	AA	AB	AB	BB	AB	BB	AB	AB	AA	AB	AB	AA	AB	BB	AB	AB	AB	BB	BB	AB	AB	BB	BB	AB	AA	BB	AB	AB	AB	AA	AB	BB	BB	BB	AB	BB	AB	AB	BB	AB	AB	AB	BB	AA	BB
chr2_4734598_C_T	2	4734598	TOP	[A/G]	AA	AA	AA	AA	AA	AA	AA	AA	AA	AA	AA	AA	AA	AA	AA	AA	AA	AA	AA	AA	AA	AA	AA	AA	AA	AA	AA	AA	AA	AA	AA	AA	AA	AA	AA	AA	AA	AA	AA	AA	AA	AA	AA	AA	AA
chr2_4793297_C_T	2	4793297	BOT	[T/C]	AA	AB	AB	BB	AB	BB	AB	AB	AA	AB	AB	AA	AB	BB	AB	AB	AB	BB	BB	AB	AB	BB	BB	AB	AA	BB	AB	AB	AB	AA	AB	BB	BB	BB	AB	BB	AB	AB	BB	AB	AB	AB	BB	AA	BB
chr2_481400_C_T	2	481400	TOP	[A/G]	BB	BB	BB	BB	BB	BB	BB	BB	BB	BB	BB	BB	BB	BB	BB	BB	BB	BB	BB	BB	BB	BB	BB	BB	BB	BB	BB	BB	BB	BB	BB	BB	BB	BB	BB	BB	BB	BB	BB	BB	BB	BB	BB	BB	BB
chr2_4824642_A_G	2	4824642	TOP	[A/G]	BB	BB	BB	BB	BB	BB	BB	BB	BB	BB	BB	BB	BB	BB	BB	BB	BB	BB	BB	BB	BB	BB	BB	BB	BB	BB	BB	BB	BB	BB	BB	BB	BB	BB	BB	BB	BB	BB	BB	BB	BB	BB	BB	BB	BB
chr2_4826364_C_T	2	4826364	BOT	[T/C]	BB	BB	BB	BB	BB	BB	BB	BB	BB	BB	BB	BB	BB	BB	BB	BB	BB	BB	BB	BB	BB	BB	BB	BB	BB	BB	BB	BB	BB	BB	BB	BB	BB	BB	BB	BB	BB	BB	BB	BB	BB	BB	BB	BB	BB
mu_o_A_G_chr2_4841483	2	4841483	TOP	[A/G]	AA	AA	AA	AA	AA	AA	AA	AA	AA	AA	AA	AA	AA	AA	AA	AA	AA	AA	AA	AA	AA	AA	AA	AA	AA	AA	AA	AA	AA	AA	AA	AA	AA	AA	AA	AA	AA	AA	AA	AA	AA	AA	AA	AA	AA
chr2_4852474_A_G	2	4852474	TOP	[A/G]	AA	AB	AB	AB	AB	BB	AB	AB	AA	AB	AB	AA	AB	BB	AB	AB	AB	BB	BB	AB	AB	BB	BB	AA	AA	BB	AB	AB	AB	AA	AB	BB	BB	BB	AB	BB	AB	AB	BB	AB	AB	AB	BB	AA	BB
chr2_486451_C_T	2	486451	TOP	[A/G]	BB	BB	BB	BB	BB	BB	BB	BB	BB	BB	BB	BB	BB	BB	BB	BB	BB	BB	BB	BB	BB	BB	BB	BB	BB	BB	BB	BB	BB	BB	BB	BB	BB	BB	BB	BB	BB	BB	BB	BB	BB	BB	BB	BB	BB
SNP1487_41	2	4874581	BOT	[T/C]	BB	AB	AB	AB	AB	AA	AB	AB	BB	AB	AB	BB	AB	NC	AB	AB	AB	AA	AA	AB	AB	AA	AA	BB	BB	AA	AB	AB	AB	BB	AB	AA	AA	AA	AB	AA	AB	AB	AA	AB	AB	AB	AA	BB	AA
chr2_4883183_C_T	2	4883183	TOP	[A/G]	BB	BB	BB	BB	BB	BB	BB	BB	BB	BB	BB	BB	BB	BB	BB	BB	BB	BB	BB	BB	BB	BB	BB	BB	BB	BB	BB	BB	BB	BB	BB	BB	BB	BB	BB	BB	BB	BB	BB	BB	BB	BB	BB	BB	BB
chr2_4883320_C_T	2	4883320	TOP	[A/G]	AA	AA	AA	AA	AA	AA	AA	AA	AA	AA	AA	AA	AA	AA	AA	AA	AA	AA	AA	AA	AA	AA	AA	AA	AA	AA	AA	AA	AA	AA	AA	AA	AA	AA	AA	AA	AA	AA	AA	AA	AA	AA	AA	AA	AA
chr2_5039647_C_T	2	5039647	BOT	[T/C]	AA	AA	AA	AA	AA	AA	AA	AA	AA	AA	AA	AA	AA	AA	AA	AA	AA	AA	AA	AA	AA	AA	AA	AA	AA	AA	AA	AA	AA	AA	AA	AA	AA	AA	AA	AA	AA	AA	AA	AA	AA	AA	AA	AA	AA
chr2_5047839_A_C	2	5047839	TOP	[A/C]	AA	AA	AA	AA	AA	AA	AA	AA	AA	AA	AA	AA	AA	AA	AA	AA	AA	AA	AA	AA	AA	AA	AA	AA	AA	AA	AA	AA	AA	AA	AA	AA	AA	AA	AA	AA	AA	AA	AA	AA	AA	AA	AA	AA	AA
chr2_5063635_C_T	2	5063635	TOP	[A/G]	BB	BB	BB	BB	BB	BB	BB	BB	BB	BB	BB	BB	BB	BB	BB	BB	BB	BB	BB	BB	BB	BB	BB	BB	BB	BB	BB	BB	BB	BB	BB	BB	BB	BB	BB	BB	BB	BB	BB	BB	BB	BB	BB	BB	BB
chr2_5064637_C_T	2	5064637	TOP	[A/G]	BB	BB	BB	BB	BB	BB	BB	BB	BB	BB	BB	BB	BB	BB	BB	BB	BB	BB	BB	BB	BB	BB	BB	BB	BB	BB	BB	BB	BB	BB	BB	BB	BB	BB	BB	BB	BB	BB	BB	BB	BB	BB	BB	BB	BB
chr2_5105885_G_T	2	5105885	TOP	[A/C]	AA	AA	AA	AA	AA	AA	AA	AA	AA	AA	AA	AA	AA	AA	AA	AA	AA	AA	AA	AA	AA	AA	AA	AA	AA	AA	AA	AA	AA	AA	AA	AA	AA	AA	AA	AA	AA	AA	AA	AA	AA	AA	AA	AA	AA
ae_T_C_chr2_5111337	2	5111337	BOT	[T/C]	AA	AA	AA	AA	AA	AA	AA	AA	AA	AA	AA	AA	AA	AA	AA	AA	AA	AA	AA	AA	AA	AA	AA	AA	AA	AA	AA	AA	AA	AA	AA	AA	AA	AA	AA	AA	AA	AA	AA	AA	AA	AA	AA	AA	AA
chr2_5133871_A_G	2	5133871	BOT	[T/C]	AA	AA	AA	AA	AA	AA	AA	AA	AA	AA	AA	AA	AA	AA	AA	AA	AA	AA	AA	AA	AA	AA	AA	AA	AA	AA	AA	AA	AA	AA	AA	AA	AA	AA	AA	AA	AA	AA	AA	AA	AA	AA	AA	AA	AA
SNP581_114	2	5141894	TOP	[A/G]	AA	AA	AA	AA	AA	AA	AA	AA	AA	AA	AA	AA	AA	AA	AA	AA	AA	AA	AA	AA	AA	AA	AA	AA	AA	AA	AA	AA	AA	AA	AA	AA	AA	AA	AA	AA	AA	AA	AA	AA	AA	AA	AA	AA	AA
chr2_5165704_C_T	2	5165704	TOP	[A/G]	BB	BB	BB	BB	BB	BB	BB	BB	BB	BB	BB	BB	BB	BB	BB	BB	BB	BB	BB	BB	BB	BB	BB	BB	BB	BB	BB	BB	BB	BB	BB	BB	BB	BB	BB	BB	BB	BB	BB	BB	BB	BB	BB	BB	BB
chr2_517596_C_T	2	517596	TOP	[A/G]	AA	AA	AA	AA	AA	AA	AA	AA	AA	AA	AA	AA	AA	AA	AA	AA	AA	AA	AA	AA	AA	AA	AA	AA	AA	AA	AA	AA	AA	AA	AA	NC	AA	AA	AA	AA	AA	AA	AA	AA	AA	AA	AA	AA	AA
lb_A_C_chr2_5187140	2	5187140	BOT	[T/G]	AA	AA	AA	AA	AA	AA	AA	AA	AA	AA	AA	AA	AA	AA	AA	AA	AA	AA	AA	AA	AA	AA	AA	AA	AA	AA	AA	AA	AA	AA	AA	AA	AA	AA	AA	AA	AA	AA	AA	AA	AA	AA	AA	AA	AA
chr2_5193991_C_T	2	5193991	BOT	[T/C]	AA	AA	AA	AA	AA	AA	AA	AA	AA	AA	AA	AA	AA	AA	AA	AA	AA	AA	AA	AA	AA	AA	AA	AA	AA	AA	AA	AA	AA	AA	AA	AA	AA	AA	AA	AA	AA	AA	AA	AA	AA	AA	AA	AA	AA
chr2_5201898_C_T	2	5201898	BOT	[T/C]	AA	AA	AA	AA	AA	AA	AA	AA	AA	AA	AA	AA	AA	AA	AA	AA	AA	AA	AA	AA	AA	AA	AA	AA	AA	AA	AA	AA	AA	AA	AA	AA	AA	AA	AA	AA	AA	AA	AA	AA	AA	AA	AA	AA	AA
chr2_5236271_G_T	2	5236271	TOP	[A/C]	BB	BB	BB	BB	BB	BB	BB	BB	BB	BB	BB	BB	BB	BB	BB	BB	BB	BB	BB	BB	BB	BB	BB	BB	BB	BB	BB	BB	BB	BB	BB	BB	BB	BB	BB	BB	BB	BB	BB	BB	BB	BB	BB	BB	BB
chr2_5260293_C_T	2	5260293	TOP	[A/G]	BB	BB	BB	BB	BB	BB	BB	BB	BB	BB	BB	BB	BB	BB	BB	BB	BB	BB	BB	BB	BB	BB	BB	BB	BB	BB	BB	BB	BB	BB	BB	NC	BB	BB	BB	BB	BB	BB	BB	BB	BB	BB	BB	BB	BB
chr2_5279601_C_T	2	5279601	BOT	[T/C]	AA	AA	AA	AA	AA	AA	AA	AA	AA	AA	AA	AA	AA	AA	AA	AA	AA	AA	AA	AA	AA	AA	AA	AA	AA	AA	AA	AA	AA	AA	AA	NC	AA	AA	AA	AA	AA	AA	AA	AA	AA	AA	AA	AA	AA
chr2_5289880_C_T	2	5289880	BOT	[T/C]	BB	BB	BB	BB	BB	BB	BB	BB	BB	BB	BB	BB	BB	BB	BB	BB	BB	BB	BB	BB	BB	BB	BB	BB	BB	BB	BB	BB	BB	BB	BB	BB	BB	BB	BB	BB	BB	BB	BB	BB	BB	BB	BB	BB	BB
chr2_5376726_C_T	2	5376726	TOP	[A/G]	AA	AA	AA	AA	AA	AA	AA	AA	AA	AA	AA	AA	AA	AA	AA	AA	AA	AA	AA	AA	AA	AA	AA	AA	AA	AA	AA	AA	AA	AA	AA	AA	AA	AA	AA	AA	AA	AA	AA	AA	AA	AA	AA	AA	AA
chr2_5388038_A_G	2	5388038	BOT	[T/C]	AA	AA	AA	AA	AA	AA	AA	AA	AA	AA	AA	AA	AA	AA	AA	AA	AA	AA	AA	AA	AA	AA	AA	AA	AA	AA	AA	AA	AA	AA	AA	AA	AA	AA	AA	AA	AA	AA	AA	AA	AA	AA	AA	AA	AA
chr2_5430203_G_T	2	5430203	BOT	[T/G]	AB	AB	AB	AB	BB	BB	AB	AB	AA	AB	AB	AA	AB	BB	AB	AB	AB	BB	BB	AB	AB	BB	BB	AA	AA	BB	AB	AB	AB	AA	AB	BB	AB	BB	AB	BB	AB	AA	BB	AB	AB	AB	BB	AA	BB
chr2_543373_C_T	2	543373	BOT	[T/C]	BB	BB	BB	BB	BB	BB	BB	BB	BB	BB	BB	BB	BB	BB	BB	BB	BB	BB	BB	BB	BB	BB	BB	BB	BB	BB	BB	BB	BB	BB	BB	BB	BB	BB	BB	BB	BB	BB	BB	BB	BB	BB	BB	BB	BB
li_C_A_chr2_5609792	2	5609792	TOP	[A/C]	AA	AA	AA	AA	AA	AA	AA	AA	NC	AA	AA	NC	AA	AA	AA	AA	AA	AA	AA	AA	AA	AA	AA	NC	NC	AA	AA	AA	AA	NC	AA	AA	AA	AA	AA	AA	AA	NC	AA	AA	AA	AA	AA	NC	AA
chr2_5646321_C_T	2	5646321	BOT	[T/C]	AA	AA	AA	AA	AA	AA	AA	AA	AA	AA	AA	AA	AA	AA	AA	AA	AA	AA	AA	AA	AA	AA	AA	AA	AA	AA	AA	AA	AA	AA	AA	NC	AA	AA	AA	AA	AA	AA	AA	AA	AA	AA	AA	AA	AA
be_C_A_chr2_5646654	2	5646654	BOT	[T/G]	BB	BB	BB	BB	BB	BB	BB	BB	BB	BB	BB	BB	BB	BB	BB	BB	BB	BB	BB	BB	BB	BB	BB	BB	BB	BB	BB	BB	BB	BB	BB	BB	BB	BB	BB	BB	BB	BB	BB	BB	BB	BB	BB	BB	BB
chr2_5662969_C_T	2	5662969	BOT	[T/C]	AA	AA	AA	AA	AA	AA	AA	AA	AA	AA	AA	AA	AA	AA	AA	AA	AA	AA	AA	AA	AA	AA	AA	AA	AA	AA	AA	AA	AA	AA	AA	AA	AA	AA	AA	AA	AA	AA	AA	AA	AA	AA	AA	AA	AA
chr2_5664339_G_T	2	5664339	BOT	[T/G]	AA	AA	AA	AA	AA	AA	AA	AA	AA	AA	AA	AA	AA	AA	AA	AA	AA	AA	AA	AA	AA	AA	AA	AA	AA	AA	AA	AA	AA	AA	AA	AA	AA	AA	AA	AA	AA	AA	AA	AA	AA	AA	AA	AA	AA
cn_G_A_chr2_5681886	2	5681886	BOT	[T/C]	AB	AB	BB	AB	BB	BB	AB	AB	AA	AB	AB	AA	AB	BB	AB	AB	AB	BB	BB	AB	AB	BB	BB	AA	AA	BB	AB	AB	AB	AA	AB	BB	AB	BB	AB	BB	AB	AA	BB	AB	AB	AB	BB	AA	BB
lb_T_C_chr2_5695258	2	5695258	BOT	[T/C]	AA	AA	AA	AA	AA	AA	AA	AA	AA	AA	AA	AA	AA	AA	AA	AA	AA	AA	AA	AA	AA	AA	AA	AA	AA	AA	AA	AA	AA	AA	AA	AA	AA	AA	AA	AA	AA	AA	AA	AA	AA	AA	AA	AA	AA
chr2_5695975_A_G	2	5695975	BOT	[T/C]	AA	AA	AA	AA	AA	AA	AA	AA	AA	AA	AA	AA	AA	AA	AA	AA	AA	AA	AA	AA	AA	AA	AA	AA	AA	AA	AA	AA	AA	AA	AA	NC	AA	AA	AA	AA	AA	AA	AA	AA	AA	AA	AA	AA	AA
chr2_5726489_A_G	2	5726489	BOT	[T/C]	AB	AB	AA	AB	AA	AA	AB	AB	BB	AB	AB	BB	AB	AA	AB	AB	AB	AA	AA	AB	AB	AA	AA	BB	BB	AA	AB	AB	AB	BB	AB	AA	AB	AA	AB	AA	AB	BB	AA	AB	AB	AB	AA	BB	AA
chr2_5727275_A_C	2	5727275	TOP	[A/C]	AB	AB	AA	AB	AA	AA	AB	AB	BB	AB	AB	BB	AB	NC	AB	AB	AB	AA	AA	AB	AB	AA	AA	BB	BB	AA	AB	AB	AB	BB	AB	NC	AB	AA	AB	AA	AB	BB	AA	AB	AB	AB	AA	BB	AA
chr2_5729271_A_G	2	5729271	BOT	[T/C]	BB	BB	BB	BB	BB	BB	BB	BB	BB	BB	BB	BB	BB	BB	BB	BB	BB	BB	BB	BB	BB	BB	BB	BB	BB	BB	BB	BB	BB	BB	BB	BB	BB	BB	BB	BB	BB	BB	BB	BB	BB	BB	BB	BB	BB
chr2_5759393_A_G	2	5759393	BOT	[T/C]	AA	AA	AA	AA	AA	AA	AA	AA	AA	AA	AA	AA	AA	AA	AA	AA	AA	AA	AA	AA	AA	AA	AA	AA	AA	AA	AA	AA	AA	AA	AA	AA	AA	AA	AA	AA	AA	AA	AA	AA	AA	AA	AA	AA	AA
chr2_578645_C_T	2	578645	TOP	[A/G]	BB	BB	BB	BB	BB	BB	BB	BB	BB	BB	BB	BB	BB	BB	BB	BB	BB	BB	BB	BB	BB	BB	BB	BB	BB	BB	BB	BB	BB	BB	BB	BB	BB	BB	BB	BB	BB	BB	BB	BB	BB	BB	BB	BB	BB
chr2_578893_A_G	2	578893	TOP	[A/G]	AA	AA	AA	AA	AA	AA	AA	AA	AA	AA	AA	AA	AA	AA	AA	AA	AA	AA	AA	AA	AA	AA	AA	AA	AA	AA	AA	AA	AA	AA	AA	AA	AA	AA	AA	AA	AA	AA	AA	AA	AA	AA	AA	AA	AA
chr2_5788962_A_G	2	5788962	TOP	[A/G]	AA	AA	AA	AA	AA	AA	AA	AA	AA	AA	AA	AA	AA	AA	AA	AA	AA	AA	AA	AA	AA	AA	AA	AA	AA	AA	AA	AA	AA	AA	AA	AA	AA	AA	AA	AA	AA	AA	AA	AA	AA	AA	AA	AA	AA
chr2_5815525_A_C	2	5815525	BOT	[T/G]	BB	BB	BB	BB	BB	BB	BB	BB	BB	BB	BB	BB	BB	BB	BB	BB	BB	BB	BB	BB	BB	BB	BB	BB	BB	BB	BB	BB	BB	BB	BB	BB	BB	BB	BB	BB	BB	BB	BB	BB	BB	BB	BB	BB	BB
chr2_5818402_A_C	2	5818402	TOP	[A/C]	AB	AB	AA	AB	AA	AA	AB	AB	BB	AB	AB	BB	AB	AA	AB	AB	AB	AA	AA	AB	AB	AA	AB	BB	BB	AA	AB	AB	AB	BB	AB	AA	AB	AA	AB	AA	AB	BB	AA	AB	AB	AB	AA	BB	AA
chr2_5873057_A_G	2	5873057	TOP	[A/G]	AB	AB	AA	AB	AA	AA	AB	AB	BB	AB	AB	BB	AB	AA	AB	AB	AB	AA	AA	AB	AB	AA	AB	BB	BB	AA	AB	AB	AB	BB	AB	AA	AB	AA	AB	AA	AB	BB	AA	AB	AB	AB	AA	BB	AA
li_A_G_chr2_588818	2	588818	TOP	[A/G]	AA	AA	AA	AA	AA	AA	AA	AA	AA	AA	AA	AA	AA	AA	AA	AA	AA	AA	AA	AA	AA	AA	AA	AA	AA	AA	AA	AA	AA	AA	AA	AA	AA	AA	AA	AA	AA	AA	AA	AA	AA	AA	AA	AA	AA
chr2_5893947_A_G	2	5893947	TOP	[A/G]	BB	BB	BB	BB	BB	BB	BB	BB	BB	BB	BB	BB	BB	BB	BB	BB	BB	BB	BB	BB	BB	BB	BB	BB	BB	BB	BB	BB	BB	BB	BB	BB	BB	BB	BB	BB	BB	BB	BB	BB	BB	BB	BB	BB	BB
chr2_5917719_A_G	2	5917719	TOP	[A/G]	AB	AB	AA	AB	AA	AA	AB	AB	BB	AB	AB	BB	AB	NC	AB	AB	AB	AA	AA	AB	AB	AA	AB	BB	BB	AA	AB	AB	AB	BB	AB	AA	AB	AA	AB	AA	AB	BB	AA	AB	AB	AB	AA	BB	AA
chr2_5946698_A_C	2	5946698	TOP	[A/C]	AB	AB	BB	AB	BB	BB	AB	AB	AA	AB	AB	AA	AB	NC	AB	AB	AB	BB	BB	AB	AB	BB	AB	AA	AA	BB	AB	AB	AB	AA	AB	BB	AB	BB	AB	BB	AB	AA	BB	AB	AB	AB	BB	AA	BB
chr2_5954354_A_C	2	5954354	TOP	[A/C]	AB	AB	AA	AB	AA	AA	AB	AB	BB	AB	AB	BB	AB	NC	AB	AB	AB	AA	AA	AB	AB	AA	AB	BB	BB	AA	AB	AB	AB	BB	AB	NC	AB	AA	AB	AA	AB	BB	AA	AB	AB	AB	AA	BB	AA
chr2_6006239_C_T	2	6006239	BOT	[T/C]	AA	AA	AA	AA	AA	AA	AA	AA	AA	AA	AA	AA	AA	AA	AA	AA	AA	AA	AA	AA	AA	AA	AA	AA	AA	AA	AA	AA	AA	AA	AA	AA	AA	AA	AA	AA	AA	AA	AA	AA	AA	AA	AA	AA	AA
chr2_6040324_A_G	2	6040324	BOT	[T/C]	AB	AB	AA	AB	AA	AA	AB	AB	BB	AB	AB	BB	AB	NC	AB	AB	AB	AA	AA	AB	AB	AA	AB	BB	BB	AA	AB	AB	AB	BB	AB	AA	AB	AA	AB	AA	AB	BB	AA	AB	AB	AB	AA	BB	AA
chr2_6041573_A_C	2	6041573	BOT	[T/G]	BB	BB	BB	BB	BB	BB	BB	BB	BB	BB	BB	BB	BB	BB	BB	BB	BB	BB	BB	BB	BB	BB	BB	BB	BB	BB	BB	BB	BB	BB	BB	BB	BB	BB	BB	BB	BB	BB	BB	BB	BB	BB	BB	BB	BB
chr2_604535_G_T	2	604535	BOT	[T/G]	AA	AA	AA	AA	AA	AA	AA	AA	AA	AA	AA	AA	AA	AA	AA	AA	AA	AA	AA	AA	AA	AA	AA	AA	AA	AA	AA	AA	AA	AA	AA	AA	AA	AA	AA	AA	AA	AA	AA	AA	AA	AA	AA	AA	AA
chr2_6048259_A_G	2	6048259	TOP	[A/G]	BB	BB	BB	BB	BB	BB	BB	BB	BB	BB	BB	BB	BB	BB	BB	BB	BB	BB	BB	BB	BB	BB	BB	BB	BB	BB	BB	BB	BB	BB	BB	BB	BB	BB	BB	BB	BB	BB	BB	BB	BB	BB	BB	BB	BB
chr2_6076899_C_T	2	6076899	BOT	[T/C]	BB	BB	BB	BB	BB	BB	BB	BB	BB	BB	BB	BB	BB	BB	BB	BB	BB	BB	BB	BB	BB	BB	BB	BB	BB	BB	BB	BB	BB	BB	BB	BB	BB	BB	BB	BB	BB	BB	BB	BB	BB	BB	BB	BB	BB
chr2_6101616_A_C	2	6101616	TOP	[A/C]	BB	BB	BB	BB	BB	BB	BB	BB	BB	BB	BB	BB	BB	BB	BB	BB	BB	BB	BB	BB	BB	BB	BB	BB	BB	BB	BB	BB	BB	BB	BB	BB	BB	BB	BB	BB	BB	BB	BB	BB	BB	BB	BB	BB	BB
mu_s_A_G_chr2_6121983	2	6121983	TOP	[A/G]	AA	AA	AA	AA	AA	AA	AA	AA	AA	AA	AA	AA	AA	AA	AA	AA	AA	AA	AA	AA	AA	AA	AA	AA	AA	AA	AA	AA	AA	AA	AA	AA	AA	AA	AA	AA	AA	AA	AA	AA	AA	AA	AA	AA	AA
chr2_6126937_A_G	2	6126937	BOT	[T/C]	AB	AB	AA	AB	AA	AA	AB	AB	BB	AB	AB	BB	AB	AA	AB	AB	AB	AA	AA	AB	AB	AA	AB	BB	BB	AA	AB	AB	AB	BB	AB	AA	AB	AA	AB	AA	AB	BB	AA	AB	AB	AB	AA	BB	AA
chr2_6129993_A_G	2	6129993	BOT	[T/C]	AA	AA	AA	AA	AA	AA	AA	AA	AA	AA	AA	AA	AA	AA	AA	AA	AA	AA	AA	AA	AA	AA	AA	AA	AA	AA	AA	AA	AA	AA	AA	AA	AA	AA	AA	AA	AA	AA	AA	AA	AA	AA	AA	AA	AA
chr2_6164795_G_T	2	6164795	BOT	[T/G]	BB	BB	BB	BB	BB	BB	BB	BB	BB	BB	BB	BB	BB	BB	BB	BB	BB	BB	BB	BB	BB	BB	BB	BB	BB	BB	BB	BB	BB	BB	BB	BB	BB	BB	BB	BB	BB	BB	BB	BB	BB	BB	BB	BB	BB
cn_A_G_chr2_6185367	2	6185367	TOP	[A/G]	AA	AA	AA	AA	NC	AA	AA	AA	AA	AA	AA	AA	AA	AA	AA	AA	AA	AA	AA	AA	AA	AA	AA	AA	AA	AA	AA	AA	AA	AA	AA	AA	AA	AA	AA	AA	AA	AA	AA	AA	AA	AA	AA	AA	AA
be_C_T_chr2_6189454	2	6189454	BOT	[T/C]	BB	BB	BB	BB	BB	BB	BB	BB	BB	BB	BB	BB	BB	BB	BB	BB	BB	BB	BB	BB	BB	BB	BB	BB	BB	BB	BB	BB	BB	BB	BB	BB	BB	BB	BB	BB	BB	BB	BB	BB	BB	BB	BB	BB	BB
ae_C_T_chr2_6212991	2	6212991	BOT	[T/C]	BB	BB	BB	BB	BB	BB	BB	BB	BB	BB	BB	BB	BB	BB	BB	BB	BB	BB	BB	BB	BB	BB	BB	BB	BB	BB	BB	BB	BB	BB	BB	BB	BB	BB	BB	BB	BB	BB	BB	BB	BB	BB	BB	BB	BB
chr2_6226579_A_G	2	6226579	BOT	[T/C]	AA	AA	AA	AA	AA	AA	AA	AA	AA	AA	AA	AA	AA	AA	AA	AA	AA	AA	AA	AA	AA	AA	AA	AA	AA	AA	AA	AA	AA	AA	AA	AA	AA	AA	AA	AA	AA	AA	AA	AA	AA	AA	AA	AA	AA
chr2_6258157_A_G	2	6258157	BOT	[T/C]	BB	BB	BB	BB	BB	BB	BB	BB	BB	BB	BB	BB	BB	BB	BB	BB	BB	BB	BB	BB	BB	BB	BB	BB	BB	BB	BB	BB	BB	BB	BB	BB	BB	BB	BB	BB	BB	BB	BB	BB	BB	BB	BB	BB	BB
chr2_6280365_G_T	2	6280365	TOP	[A/C]	AA	AA	AA	AA	AA	AA	AA	AA	AA	AA	AA	AA	AA	AA	AA	AA	AA	AA	AA	AA	AA	AA	AA	AA	AA	AA	AA	AA	AA	AA	AA	AA	AA	AA	AA	AA	AA	AA	AA	AA	AA	AA	AA	AA	AA
chr2_6313608_G_T	2	6313608	TOP	[A/C]	AA	AA	AA	AA	AA	AA	AA	AA	AA	AA	AA	AA	AA	AA	AA	AA	AA	AA	AA	AA	AA	AA	AA	AA	AA	AA	AA	AA	AA	AA	AA	AA	AA	AA	AA	AA	AA	AA	AA	AA	AA	AA	AA	AA	AA
chr2_6349261_C_T	2	6349261	TOP	[A/G]	AB	AB	BB	AB	BB	BB	AB	AB	AA	AB	AB	AA	AB	NC	AB	AB	AB	BB	BB	AB	AB	BB	AB	AA	AA	BB	AB	AB	AB	AA	AB	BB	AB	BB	AB	BB	AB	AA	BB	AB	AB	AB	BB	AA	BB
chr2_6350324_C_T	2	6350324	BOT	[T/C]	AB	AB	BB	AB	BB	BB	AB	AB	AA	AB	AB	AA	AB	NC	AB	AB	AB	BB	BB	AB	AB	BB	AB	AA	AA	BB	AB	AB	AB	AA	AB	NC	AB	BB	AB	BB	AB	AA	BB	AB	AB	AB	BB	AA	BB
chr2_6368443_A_G	2	6368443	BOT	[T/C]	AB	AB	BB	AB	BB	BB	AB	AB	AA	AB	AB	AA	AB	BB	AB	AB	AB	BB	BB	AB	AB	BB	AB	AA	AA	BB	AB	AB	AB	AA	AB	BB	AB	BB	AB	BB	AB	AA	BB	AB	AB	AB	BB	AA	BB
chr2_6381028_C_T	2	6381028	BOT	[T/C]	AB	AB	AA	AB	AA	AA	AB	AB	BB	AB	AB	BB	AB	AA	AB	AB	AB	AA	AA	AB	AB	AA	AB	BB	BB	AA	AB	AB	AB	BB	AB	AA	AB	AA	AB	AA	AB	BB	AA	AB	AB	AB	AA	BB	AA
chr2_6432724_C_T	2	6432724	TOP	[A/G]	BB	BB	BB	BB	BB	BB	BB	BB	BB	BB	BB	BB	BB	BB	BB	BB	BB	BB	BB	BB	BB	BB	BB	BB	BB	BB	BB	BB	BB	BB	BB	BB	BB	BB	BB	BB	BB	BB	BB	BB	BB	BB	BB	BB	BB
chr2_6475332_A_G	2	6475332	TOP	[A/G]	BB	BB	BB	BB	BB	BB	BB	BB	BB	BB	BB	BB	BB	BB	BB	BB	BB	BB	BB	BB	BB	BB	BB	BB	BB	BB	BB	BB	BB	BB	BB	BB	BB	BB	BB	BB	BB	BB	BB	BB	BB	BB	BB	BB	BB
chr2_6501610_C_T	2	6501610	BOT	[T/C]	BB	BB	BB	BB	BB	BB	BB	BB	BB	BB	BB	BB	BB	BB	BB	BB	BB	BB	BB	BB	BB	BB	BB	BB	BB	BB	BB	BB	BB	BB	BB	BB	BB	BB	BB	BB	BB	BB	BB	BB	BB	BB	BB	BB	BB
chr2_6502038_A_C	2	6502038	BOT	[T/G]	BB	BB	BB	BB	BB	BB	BB	BB	BB	BB	BB	BB	BB	BB	BB	BB	BB	BB	BB	BB	BB	BB	BB	BB	BB	BB	BB	BB	BB	BB	BB	BB	BB	BB	BB	BB	BB	BB	BB	BB	BB	BB	BB	BB	BB
chr2_6544843_A_G	2	6544843	BOT	[T/C]	AB	AB	BB	AB	BB	BB	AB	AB	AB	AB	AB	AA	AB	NC	AB	AB	AB	BB	BB	AB	AB	BB	AB	AA	AA	BB	AB	AB	AB	AA	AB	NC	AB	BB	AB	BB	AB	AA	BB	AB	AB	AB	BB	AA	BB
chr2_655133_A_C	2	655133	TOP	[A/C]	BB	BB	BB	BB	BB	BB	BB	BB	BB	BB	BB	BB	BB	BB	BB	BB	BB	BB	BB	BB	BB	BB	BB	BB	BB	BB	BB	BB	BB	BB	BB	NC	BB	BB	BB	BB	BB	BB	BB	BB	BB	BB	BB	BB	BB
chr2_6553246_A_C	2	6553246	BOT	[T/G]	AA	AA	AA	AA	AA	AA	AA	AA	AA	AA	AA	AA	AA	AA	AA	AA	AA	AA	AA	AA	AA	AA	AA	AA	AA	AA	AA	AA	AA	AA	AA	AA	AA	AA	AA	AA	AA	AA	AA	AA	AA	AA	AA	AA	AA
chr2_6628241_A_G	2	6628241	TOP	[A/G]	BB	BB	BB	BB	BB	BB	BB	BB	BB	BB	BB	BB	BB	BB	BB	BB	BB	BB	BB	BB	BB	BB	BB	BB	BB	BB	BB	BB	BB	BB	BB	BB	BB	BB	BB	BB	BB	BB	BB	BB	BB	BB	BB	BB	BB
be_T_C_chr2_6657580	2	6657580	BOT	[T/C]	AA	AA	AA	AA	AA	AA	AA	AA	AA	AA	AA	AA	AA	AA	AA	AA	AA	AA	AA	AA	AA	AA	AA	AA	AA	AA	AA	AA	AA	AA	AA	AA	AA	AA	AA	AA	AA	AA	AA	AA	AA	AA	AA	AA	AA
chr2_6665461_C_T	2	6665461	BOT	[T/C]	AB	AB	AA	AB	AA	AA	AB	AB	AB	AB	AB	BB	AB	AA	AB	AB	AB	AA	AA	AB	AB	AA	AB	BB	BB	AA	AB	AB	AB	BB	AB	AA	AB	AA	AB	AA	AB	BB	AB	AB	AB	AB	AA	BB	AA
lb_T_C_chr2_6679862	2	6679862	BOT	[T/C]	AB	AB	BB	AB	BB	BB	AB	AB	AB	AB	AB	AA	AB	NC	AB	AB	AB	BB	BB	AB	AB	BB	AB	AA	AA	BB	AB	AB	AB	AA	AB	NC	AB	BB	AB	BB	AB	AA	AB	AB	AB	AB	BB	AA	BB
chr2_6703782_A_C	2	6703782	TOP	[A/C]	AB	AB	BB	AB	BB	BB	AB	AB	AB	AB	AB	AA	AB	BB	AB	AB	AB	BB	BB	AB	AB	BB	AB	AA	AA	BB	AB	AB	AB	AA	AB	BB	AB	BB	AB	BB	AB	AA	AB	AB	AB	AB	BB	AA	BB
chr2_670423_C_T	2	670423	BOT	[T/C]	AA	AA	AA	AA	AA	AA	AA	AA	AA	AA	AA	AA	AA	AA	AA	AA	AA	AA	AA	AA	AA	AA	AA	AA	AA	AA	AA	AA	AA	AA	AA	AA	AA	AA	AA	AA	AA	AA	AA	AA	AA	AA	AA	AA	AA
chr2_6710849_C_T	2	6710849	BOT	[T/C]	AB	AB	BB	AB	BB	BB	AB	AB	AB	AB	AB	AA	AB	NC	AB	AB	AB	BB	BB	AB	AB	BB	AB	AA	AA	BB	AB	AB	AB	AA	AB	BB	AB	BB	AB	BB	AB	AA	AB	AB	AB	AB	BB	AA	BB
cn_G_A_chr2_6715397	2	6715397	TOP	[A/G]	BB	BB	BB	BB	BB	BB	BB	BB	BB	BB	BB	BB	BB	BB	BB	BB	BB	BB	BB	BB	BB	BB	BB	BB	BB	BB	BB	BB	BB	BB	BB	BB	BB	BB	BB	BB	BB	BB	BB	BB	BB	BB	BB	BB	BB
chr2_6727718_C_T	2	6727718	BOT	[T/C]	AA	AA	AA	AA	AA	AA	AA	AA	AA	AA	AA	AA	AA	AA	AA	AA	AA	AA	AA	AA	AA	AA	AA	AA	AA	AA	AA	AA	AA	AA	AA	NC	AA	AA	AA	AA	AA	AA	AA	AA	AA	AA	AA	AA	AA
chr2_6747516_C_T	2	6747516	TOP	[A/G]	BB	BB	BB	BB	BB	BB	BB	BB	BB	BB	BB	BB	BB	BB	BB	BB	BB	BB	BB	BB	BB	BB	BB	BB	BB	BB	BB	BB	BB	BB	BB	BB	BB	BB	BB	BB	BB	BB	BB	BB	BB	BB	BB	BB	BB
chr2_6754285_A_G	2	6754285	TOP	[A/G]	AA	AA	AA	AA	AA	AA	AA	AA	AA	AA	AA	AA	AA	AA	AA	AA	AA	AA	AA	AA	AA	AA	AA	AA	AA	AA	AA	AA	AA	AA	AA	AA	AA	AA	AA	AA	AA	AA	AA	AA	AA	AA	AA	AA	AA
chr2_6790442_C_T	2	6790442	TOP	[A/G]	AA	AA	AA	AA	AA	AA	AA	AA	AA	AA	AA	AA	AA	AA	AA	AA	AA	AA	AA	AA	AA	AA	AA	AA	AA	AA	AA	AA	AA	AA	AA	AA	AA	AA	AA	AA	AA	AA	AA	AA	AA	AA	AA	AA	AA
chr2_6819508_C_T	2	6819508	TOP	[A/G]	AA	AA	AA	AA	AA	AA	AA	AA	AA	AA	AA	AA	AA	AA	AA	AA	AA	AA	AA	AA	AA	AA	AA	AA	AA	AA	AA	AA	AA	AA	AA	AA	AA	AA	AA	AA	AA	AA	AA	AA	AA	AA	AA	AA	AA
chr2_6820223_C_T	2	6820223	BOT	[T/C]	AA	AA	AA	AA	AA	AA	AA	AA	AA	AA	AA	AA	AA	AA	AA	AA	AA	AA	AA	AA	AA	AA	AA	AA	AA	AA	AA	AA	AA	AA	AA	AA	AA	AA	AA	AA	AA	AA	AA	AA	AA	AA	AA	AA	AA
ae_C_T_chr2_684788	2	684788	BOT	[T/C]	BB	BB	BB	BB	BB	BB	BB	BB	BB	BB	BB	BB	BB	BB	BB	BB	BB	BB	BB	BB	BB	BB	BB	BB	BB	BB	BB	BB	BB	BB	BB	BB	BB	BB	BB	BB	BB	BB	BB	BB	BB	BB	BB	BB	BB
chr2_6848154_C_T	2	6848154	TOP	[A/G]	AA	AA	AA	AA	AA	AA	AA	AA	AA	AA	AA	AA	AA	AA	AA	AA	AA	AA	AA	AA	AA	AA	AA	AA	AA	AA	AA	AA	AA	AA	AA	AA	AA	AA	AA	AA	AA	AA	AA	AA	AA	AA	AA	AA	AA
chr2_6864753_A_G	2	6864753	BOT	[T/C]	BB	BB	BB	BB	BB	BB	BB	BB	BB	BB	BB	BB	BB	BB	BB	BB	BB	BB	BB	BB	BB	BB	BB	BB	BB	BB	BB	BB	BB	BB	BB	BB	BB	BB	BB	BB	BB	BB	BB	BB	BB	BB	BB	BB	BB
chr2_6944394_A_G	2	6944394	TOP	[A/G]	AA	AA	AA	AA	AA	AA	AA	AA	AA	AA	AA	AA	AA	AA	AA	AA	AA	AA	AA	AA	AA	AA	AA	AA	AA	AA	AA	AA	AA	AA	AA	AA	AA	AA	AA	AA	AA	AA	AA	AA	AA	AA	AA	AA	AA
chr2_6976938_G_T	2	6976938	BOT	[T/G]	BB	BB	BB	BB	BB	BB	BB	BB	BB	BB	BB	BB	BB	BB	BB	BB	BB	BB	BB	BB	BB	BB	BB	BB	BB	BB	BB	BB	BB	BB	BB	BB	BB	BB	BB	BB	BB	BB	BB	BB	BB	BB	BB	BB	BB
chr2_6977110_C_T	2	6977110	TOP	[A/G]	BB	BB	BB	BB	BB	BB	BB	BB	BB	BB	BB	BB	BB	BB	BB	BB	BB	BB	BB	BB	BB	BB	BB	BB	BB	BB	BB	BB	BB	BB	BB	BB	BB	BB	BB	BB	BB	BB	BB	BB	BB	BB	BB	BB	BB
chr2_7006798_A_G	2	7006798	TOP	[A/G]	AA	AA	AA	AA	AA	AA	AA	AA	AA	AA	AA	AA	AA	AA	AA	AA	AA	AA	AA	AA	AA	AA	AA	AA	AA	AA	AA	AA	AA	AA	AA	AA	AA	AA	AA	AA	AA	AA	AA	AA	AA	AA	AA	AA	AA
mu_o_T_G_chr2_702127	2	702127	TOP	[A/C]	AA	AA	AA	AA	AA	AA	AA	AA	AA	AA	AA	AA	AA	AA	AA	AA	AA	AA	AA	AA	AA	AA	AA	AA	AA	AA	AA	AA	AA	AA	AA	AA	AA	AA	AA	AA	AA	AA	AA	AA	AA	AA	AA	AA	AA
chr2_7060869_A_G	2	7060869	TOP	[A/G]	BB	BB	BB	BB	BB	BB	BB	BB	BB	BB	BB	BB	BB	BB	BB	BB	BB	BB	BB	BB	BB	BB	BB	BB	BB	BB	BB	BB	BB	BB	BB	BB	BB	BB	BB	BB	BB	BB	BB	BB	BB	BB	BB	BB	BB
chr2_7070114_C_T	2	7070114	TOP	[A/G]	AA	AA	AA	AA	AA	AA	AA	AA	AA	AA	AA	AA	AA	AA	AA	AA	AA	AA	AA	AA	AA	AA	AA	AA	AA	AA	AA	AA	AA	AA	AA	AA	AA	AA	AA	AA	AA	AA	AA	AA	AA	AA	AA	AA	AA
chr2_7100711_C_T	2	7100711	TOP	[A/G]	BB	BB	BB	BB	BB	BB	BB	BB	BB	BB	BB	BB	BB	BB	BB	BB	BB	BB	BB	BB	BB	BB	BB	BB	BB	BB	BB	BB	BB	BB	BB	BB	BB	BB	BB	BB	BB	BB	BB	BB	BB	BB	BB	BB	BB
chr2_7119540_C_T	2	7119540	BOT	[T/C]	BB	BB	BB	BB	BB	BB	BB	BB	BB	BB	BB	BB	BB	BB	BB	BB	BB	BB	BB	BB	BB	BB	BB	BB	BB	BB	BB	BB	BB	BB	BB	BB	BB	BB	BB	BB	BB	BB	BB	BB	BB	BB	BB	BB	BB
ae_C_T_chr2_7145174	2	7145174	TOP	[A/G]	BB	BB	BB	BB	BB	BB	BB	BB	BB	BB	BB	BB	BB	BB	BB	BB	BB	BB	BB	BB	BB	BB	BB	BB	BB	BB	BB	BB	BB	BB	BB	BB	BB	BB	BB	BB	BB	BB	BB	BB	BB	BB	BB	BB	BB
be_C_T_chr2_7153799	2	7153799	BOT	[T/C]	BB	BB	BB	BB	BB	BB	BB	BB	BB	BB	BB	BB	BB	BB	BB	BB	BB	BB	BB	BB	BB	BB	BB	BB	BB	BB	BB	BB	BB	BB	BB	BB	BB	BB	BB	BB	BB	BB	BB	BB	BB	BB	BB	BB	BB
chr2_7161346_A_G	2	7161346	TOP	[A/G]	BB	BB	BB	BB	BB	BB	BB	BB	BB	BB	BB	BB	BB	BB	BB	BB	BB	BB	BB	BB	BB	BB	BB	BB	BB	BB	BB	BB	BB	BB	BB	NC	BB	BB	BB	BB	BB	BB	BB	BB	BB	BB	BB	BB	BB
mu_s_A_G_chr2_7193001	2	7193001	TOP	[A/G]	AA	AA	AA	AA	AA	AA	AA	AA	AA	AA	AA	AA	AA	AA	AA	AA	AA	AA	AA	AA	AA	AA	AA	AA	AA	AA	AA	AA	AA	AA	AA	AA	AA	AA	AA	AA	AA	AA	AA	AA	AA	AA	AA	AA	AA
chr2_7195735_C_T	2	7195735	BOT	[T/C]	AA	AA	AA	AA	AA	AA	AA	AA	AA	AA	AA	AA	AA	AA	AA	AA	AA	AA	AA	AA	AA	AA	AA	AA	AA	AA	AA	AA	AA	AA	AA	NC	AA	AA	AA	AA	AA	AA	AA	AA	AA	AA	AA	AA	AA
chr2_7205677_A_C	2	7205677	BOT	[T/G]	BB	BB	BB	BB	BB	BB	BB	BB	BB	BB	BB	BB	BB	BB	BB	BB	BB	BB	BB	BB	BB	BB	BB	BB	BB	BB	BB	BB	BB	BB	BB	BB	BB	BB	BB	BB	BB	BB	BB	BB	BB	BB	BB	BB	BB
chr2_7223646_A_G	2	7223646	TOP	[A/G]	AA	AA	AA	AA	AA	AA	AA	AA	AA	AA	AA	AA	AA	AA	AA	AA	AA	AA	AA	AA	AA	AA	AA	AA	AA	AA	AA	AA	AA	AA	AA	AB	AA	AA	AA	AA	AA	AA	AA	AA	AA	AA	AA	AA	AA
chr2_7235078_G_T	2	7235078	BOT	[T/G]	AA	AA	AA	AA	AA	AA	AA	AA	AA	AA	AA	AA	AA	AA	AA	AA	AA	AA	AA	AA	AA	AA	AA	AA	AA	AA	AA	AA	AA	AA	AA	AA	AA	AA	AA	AA	AA	AA	AA	AA	AA	AA	AA	AA	AA
chr2_7300456_A_G	2	7300456	BOT	[T/C]	BB	BB	BB	BB	BB	BB	BB	BB	BB	BB	BB	BB	BB	BB	BB	BB	BB	BB	BB	BB	BB	BB	BB	BB	BB	BB	BB	BB	BB	BB	BB	BB	BB	BB	BB	BB	BB	BB	BB	BB	BB	BB	BB	BB	BB
chr2_7304374_C_T	2	7304374	BOT	[T/C]	AA	AA	AA	AA	AA	AA	AA	AA	AA	AA	AA	AA	AA	AA	AA	AA	AA	AA	AA	AA	AA	AA	AA	AA	AA	AA	AA	AA	AA	AA	AA	AA	AA	AA	AA	AA	AA	AA	AA	AA	AA	AA	AA	AA	AA
chr2_732014_A_G	2	732014	TOP	[A/G]	BB	BB	BB	BB	BB	BB	BB	BB	BB	BB	BB	BB	BB	BB	BB	BB	BB	BB	BB	BB	BB	BB	BB	BB	BB	BB	BB	BB	BB	BB	BB	BB	BB	BB	BB	BB	BB	BB	BB	BB	BB	BB	BB	BB	BB
chr2_7323453_A_G	2	7323453	TOP	[A/G]	BB	BB	BB	BB	BB	BB	BB	BB	BB	BB	BB	BB	BB	BB	BB	BB	BB	BB	BB	BB	BB	BB	BB	BB	BB	BB	BB	BB	BB	BB	BB	NC	BB	BB	BB	BB	BB	BB	BB	BB	BB	BB	BB	BB	BB
chr2_7333641_G_T	2	7333641	TOP	[A/C]	BB	BB	BB	BB	BB	BB	BB	BB	BB	BB	BB	BB	BB	BB	BB	BB	BB	BB	BB	BB	BB	BB	BB	BB	BB	BB	BB	BB	BB	BB	BB	BB	BB	BB	BB	BB	BB	BB	BB	BB	BB	BB	BB	BB	BB
cn_T_C_chr2_738148	2	738148	BOT	[T/C]	AA	AA	AA	AA	AA	AA	AA	AA	AA	AA	AA	AA	AA	AA	AA	AA	AA	AA	AA	AA	AA	AA	AA	AA	AA	AA	AA	AA	AA	AA	AA	AA	AA	AA	AA	AA	AA	AA	AA	AA	AA	AA	AA	AA	AA
chr2_7384952_G_T	2	7384952	BOT	[T/G]	AA	AA	AA	AA	AA	AA	AA	AA	AA	AA	AA	AA	AA	AA	AA	AA	AA	AA	AA	AA	AA	AA	AA	AA	AA	AA	AA	AA	AA	AA	AA	AA	AA	AA	AA	AA	AA	AA	AA	AA	AA	AA	AA	AA	AA
be_G_A_chr2_738556	2	738556	TOP	[A/G]	BB	BB	BB	BB	BB	BB	BB	BB	BB	BB	BB	BB	BB	BB	BB	BB	BB	BB	BB	BB	BB	BB	BB	BB	BB	BB	BB	BB	BB	BB	BB	BB	BB	BB	BB	BB	BB	BB	BB	BB	BB	BB	BB	BB	BB
lb_A_G_chr2_741017	2	741017	BOT	[T/C]	AA	AA	AA	AA	AA	AA	AA	AA	AA	AA	AA	AA	AA	AA	AA	AA	AA	AA	AA	AA	AA	AA	AA	AA	AA	AA	AA	AA	AA	AA	AA	AA	AA	AA	AA	AA	AA	AA	AA	AA	AA	AA	AA	AA	AA
chr2_7428546_C_T	2	7428546	TOP	[A/G]	AA	AA	AA	AA	AA	AA	AA	AA	AA	AA	AA	AA	AA	AA	AA	AA	AA	AA	AA	AA	AA	AA	AA	AA	AA	AA	AA	AA	AA	AA	AA	AA	AA	AA	AA	AA	AA	AA	AA	AA	AA	AA	AA	AA	AA
chr2_7474936_C_T	2	7474936	TOP	[A/G]	BB	BB	BB	BB	BB	BB	BB	BB	BB	BB	BB	BB	BB	BB	BB	BB	BB	BB	BB	BB	BB	BB	BB	BB	BB	BB	BB	BB	BB	BB	BB	BB	BB	BB	BB	BB	BB	BB	BB	BB	BB	BB	BB	BB	BB
chr2_7520864_C_T	2	7520864	TOP	[A/G]	AA	AA	AA	AA	AA	AA	AA	AA	AA	AA	AA	AA	AA	AA	AA	AA	AA	AA	AA	AA	AA	AA	AA	AA	AA	AA	AA	AA	AA	AA	AA	AA	AA	AA	AA	AA	AA	AA	AA	AA	AA	AA	AA	AA	AA
chr2_7539910_A_C	2	7539910	TOP	[A/C]	BB	BB	BB	BB	BB	BB	BB	BB	BB	BB	BB	BB	BB	BB	BB	BB	BB	BB	BB	BB	BB	BB	BB	BB	BB	BB	BB	BB	BB	BB	BB	NC	BB	BB	BB	BB	BB	BB	BB	BB	BB	BB	BB	BB	BB
cn_G_T_chr2_7581788	2	7581788	BOT	[T/G]	BB	BB	BB	BB	BB	BB	BB	BB	BB	BB	BB	BB	BB	BB	BB	BB	BB	BB	BB	BB	BB	BB	BB	BB	BB	BB	BB	BB	BB	BB	BB	BB	BB	BB	BB	BB	BB	BB	BB	BB	BB	BB	BB	BB	BB
chr2_7598150_C_T	2	7598150	TOP	[A/G]	BB	BB	BB	BB	BB	BB	BB	BB	BB	BB	BB	BB	BB	BB	BB	BB	BB	BB	BB	BB	BB	BB	BB	BB	BB	BB	BB	BB	BB	BB	BB	BB	BB	BB	BB	BB	BB	BB	BB	BB	BB	BB	BB	BB	BB
chr2_7631378_C_T	2	7631378	BOT	[T/C]	AA	AA	AA	AA	AA	AA	AA	AA	AA	AA	AA	AA	AA	AA	AA	AA	AA	AA	AA	AA	AA	AA	AA	AA	AA	AA	AA	AA	AA	AA	AA	AA	AA	AA	AA	AA	AA	AA	AA	AA	AA	AA	AA	AA	AA
be_T_C_chr2_7634673	2	7634673	TOP	[A/G]	AA	AA	AA	AA	AA	AA	AA	AA	AA	AA	AA	AA	AA	AA	AA	AA	AA	AA	AA	AA	AA	AA	AA	AA	AA	AA	AA	AA	AA	AA	AA	AA	AA	AA	AA	AA	AA	AA	AA	AA	AA	AA	AA	AA	AA
chr2_763931_G_T	2	763931	BOT	[T/G]	BB	BB	BB	BB	BB	BB	BB	BB	BB	BB	BB	BB	BB	BB	BB	BB	BB	BB	BB	BB	BB	BB	BB	BB	BB	BB	BB	BB	BB	BB	BB	BB	BB	BB	BB	BB	BB	BB	BB	BB	BB	BB	BB	BB	BB
chr2_7668447_A_G	2	7668447	TOP	[A/G]	BB	BB	BB	BB	BB	BB	BB	BB	BB	BB	BB	BB	BB	BB	BB	BB	BB	BB	BB	BB	BB	BB	BB	BB	BB	BB	BB	BB	BB	BB	BB	BB	BB	BB	BB	BB	BB	BB	BB	BB	BB	BB	BB	BB	BB
chr2_7668577_C_T	2	7668577	BOT	[T/C]	BB	BB	BB	BB	BB	BB	BB	BB	BB	BB	BB	BB	BB	BB	BB	BB	BB	BB	BB	BB	BB	BB	BB	BB	BB	BB	BB	BB	BB	BB	BB	BB	BB	BB	BB	BB	BB	BB	BB	BB	BB	BB	BB	BB	BB
ae_T_C_chr2_7674702	2	7674702	TOP	[A/G]	AA	AA	AA	AA	AA	AA	AA	AA	AA	AA	AA	AA	AA	AA	AA	AA	AA	AA	AA	AA	AA	AA	AA	AA	AA	AA	AA	AA	AA	AA	AA	AA	AA	AA	AA	AA	AA	AA	AA	AA	AA	AA	AA	AA	AA
chr2_7723201_A_G	2	7723201	BOT	[T/C]	AA	AA	AA	AA	AA	AA	AA	AA	AA	AA	AA	AA	AA	AA	AA	AA	AA	AA	AA	AA	AA	AA	AA	AA	AA	AA	AA	AA	AA	AA	AA	AA	AA	AA	AA	AA	AA	AA	AA	AA	AA	AA	AA	AA	AA
chr2_7780660_C_T	2	7780660	TOP	[A/G]	BB	BB	BB	BB	BB	BB	BB	BB	BB	BB	BB	BB	BB	BB	BB	BB	BB	BB	BB	BB	BB	BB	BB	BB	BB	BB	BB	BB	BB	BB	BB	BB	BB	BB	BB	BB	BB	BB	BB	BB	BB	BB	BB	BB	BB
chr2_7807926_C_T	2	7807926	TOP	[A/G]	BB	BB	BB	BB	BB	BB	BB	BB	BB	BB	BB	BB	BB	BB	BB	BB	BB	BB	BB	BB	BB	BB	BB	BB	BB	BB	BB	BB	BB	BB	BB	BB	BB	BB	BB	BB	BB	BB	BB	BB	BB	BB	BB	BB	BB
chr2_7838818_A_G	2	7838818	BOT	[T/C]	AA	AA	AA	AA	AA	AA	AA	AA	AA	AA	AA	AA	AA	AA	AA	AA	AA	AA	AA	AA	AA	AA	AA	AA	AA	AA	AA	AA	AA	AA	AA	AA	AA	AA	AA	AA	AA	AA	AA	AA	AA	AA	AA	AA	AA
chr2_7851859_A_G	2	7851859	BOT	[T/C]	BB	BB	BB	BB	BB	BB	BB	BB	BB	BB	BB	BB	BB	BB	BB	BB	BB	BB	BB	BB	BB	BB	BB	BB	BB	BB	BB	BB	BB	BB	BB	BB	BB	BB	BB	BB	BB	BB	BB	BB	BB	BB	BB	BB	BB
chr2_7879961_G_T	2	7879961	TOP	[A/C]	AA	AA	AA	AA	AA	AA	AA	AA	AA	AA	AA	AA	AA	AA	AA	AA	AA	AA	AA	AA	AA	AA	AA	AA	AA	AA	AA	AA	AA	AA	AA	AA	AA	AA	AA	AA	AA	AA	AA	AA	AA	AA	AA	AA	AA
chr2_7905347_A_G	2	7905347	BOT	[T/C]	BB	BB	BB	BB	BB	BB	BB	BB	BB	BB	BB	BB	BB	BB	BB	BB	BB	BB	BB	BB	BB	BB	BB	BB	BB	BB	BB	BB	BB	BB	BB	BB	BB	BB	BB	BB	BB	BB	BB	BB	BB	BB	BB	BB	BB
chr2_7943169_A_C	2	7943169	BOT	[T/G]	AA	AA	AA	AA	AA	AA	AA	AA	AA	AA	AA	AA	AA	AA	AA	AA	AA	AA	AA	AA	AA	AA	AA	AA	AA	AA	AA	AA	AA	AA	AA	NC	AA	AA	AA	AA	AA	AA	AA	AA	AA	AA	AA	AA	AA
chr2_7969863_G_T	2	7969863	TOP	[A/C]	BB	BB	BB	BB	BB	BB	BB	BB	BB	BB	BB	BB	BB	BB	BB	BB	BB	BB	BB	BB	BB	BB	BB	BB	BB	BB	BB	BB	BB	BB	BB	BB	BB	BB	BB	BB	BB	BB	BB	BB	BB	BB	BB	BB	BB
chr2_7970900_C_T	2	7970900	TOP	[A/G]	BB	BB	BB	BB	BB	BB	BB	BB	BB	BB	BB	BB	BB	BB	BB	BB	BB	BB	BB	BB	BB	BB	BB	BB	BB	BB	BB	BB	BB	BB	BB	BB	BB	BB	BB	BB	BB	BB	BB	BB	BB	BB	BB	BB	BB
chr2_8001694_A_G	2	8001694	TOP	[A/G]	AA	AA	AA	AA	AA	AA	AA	AA	AA	AA	AA	AA	AA	AA	AA	AA	AA	AA	AA	AA	AA	AA	AA	AA	AA	AA	AA	AA	AA	AA	AA	AA	AA	AA	AA	AA	AA	AA	AA	AA	AA	AA	AA	AA	AA
chr2_8020992_A_C	2	8020992	TOP	[A/C]	AB	AB	AB	AB	AB	AB	AB	AB	AB	AB	AB	AB	AB	AB	AB	AB	AB	AB	AB	AB	AB	AB	AB	AB	AB	AB	AB	AB	AB	AB	AB	AB	AB	AB	AB	AB	AB	AB	AB	AB	AB	AB	AB	AB	AB
chr2_8021856_C_T	2	8021856	BOT	[T/C]	BB	BB	BB	BB	BB	BB	BB	BB	BB	BB	BB	BB	BB	BB	BB	BB	BB	BB	BB	BB	BB	BB	BB	BB	BB	BB	BB	BB	BB	BB	BB	NC	BB	BB	BB	BB	BB	BB	BB	BB	BB	BB	BB	BB	BB
chr2_80247_C_T	2	80247	TOP	[A/G]	AB	AB	BB	AB	BB	BB	AB	AB	AA	AB	AB	AA	AB	NC	AB	AB	AB	BB	BB	AB	AB	BB	BB	AA	AA	BB	AB	AB	AB	AA	AB	NC	AB	BB	AB	BB	AB	AA	BB	AB	AB	AB	BB	AA	BB
chr2_8029257_A_G	2	8029257	BOT	[T/C]	AA	AA	AA	AA	AA	AA	AA	AA	AA	AA	AA	AA	AA	AA	AA	AA	AA	AA	AA	AA	AA	AA	AA	AA	AA	AA	AA	AA	AA	AA	AA	AA	AA	AA	AA	AA	AA	AA	AA	AA	AA	AA	AA	AA	AA
chr2_8104923_A_G	2	8104923	BOT	[T/C]	BB	BB	BB	BB	BB	BB	BB	BB	BB	BB	BB	BB	BB	BB	BB	BB	BB	BB	BB	BB	BB	BB	BB	BB	BB	BB	BB	BB	BB	BB	BB	BB	BB	BB	BB	BB	BB	BB	BB	BB	BB	BB	BB	BB	BB
chr2_8125688_A_G	2	8125688	TOP	[A/G]	BB	BB	BB	BB	BB	BB	BB	BB	BB	BB	BB	BB	BB	BB	BB	BB	BB	BB	BB	BB	BB	BB	BB	BB	BB	BB	BB	BB	BB	BB	BB	BB	BB	BB	BB	BB	BB	BB	BB	BB	BB	BB	BB	BB	BB
li_G_A_chr2_8127786	2	8127786	TOP	[A/G]	BB	BB	BB	BB	BB	BB	BB	BB	BB	BB	BB	BB	BB	BB	BB	BB	BB	BB	BB	BB	BB	BB	BB	BB	BB	BB	BB	BB	BB	BB	BB	BB	BB	BB	BB	BB	BB	BB	BB	BB	BB	BB	BB	BB	BB
cn_T_C_chr2_8162031	2	8162031	TOP	[A/G]	AA	AA	AA	AA	AA	AA	AA	AA	AA	AA	AA	AA	AA	AA	AA	AA	AA	AA	AA	AA	AA	AA	AA	AA	AA	AA	AA	AA	AA	AA	AA	AA	AA	AA	AA	AA	AA	AA	AA	AA	AA	AA	AA	AA	AA
chr2_8163276_C_T	2	8163276	TOP	[A/G]	BB	BB	BB	BB	BB	BB	BB	BB	BB	BB	BB	BB	BB	BB	BB	BB	BB	BB	BB	BB	BB	BB	BB	BB	BB	BB	BB	BB	BB	BB	BB	BB	BB	BB	BB	BB	BB	BB	BB	BB	BB	BB	BB	BB	BB
ae_G_T_chr2_8165879	2	8165879	BOT	[T/G]	BB	BB	BB	BB	BB	BB	BB	BB	BB	BB	BB	BB	BB	BB	BB	BB	BB	BB	BB	BB	BB	BB	BB	BB	BB	BB	BB	BB	BB	BB	BB	BB	BB	BB	BB	BB	BB	BB	BB	BB	BB	BB	BB	BB	BB
chr2_8185167_C_T	2	8185167	TOP	[A/G]	BB	BB	BB	BB	BB	BB	BB	BB	BB	BB	BB	BB	BB	BB	BB	BB	BB	BB	BB	BB	BB	BB	BB	BB	BB	BB	BB	BB	BB	BB	BB	BB	BB	BB	BB	BB	BB	BB	BB	BB	BB	BB	BB	BB	BB
chr2_8227729_C_T	2	8227729	BOT	[T/C]	BB	BB	BB	BB	BB	BB	BB	BB	BB	BB	BB	BB	BB	BB	BB	BB	BB	BB	BB	BB	BB	BB	BB	BB	BB	BB	BB	BB	BB	BB	BB	BB	BB	BB	BB	BB	BB	BB	BB	BB	BB	BB	BB	BB	BB
chr2_8288379_A_G	2	8288379	BOT	[T/C]	BB	BB	BB	BB	BB	BB	BB	BB	BB	BB	BB	BB	BB	BB	BB	BB	BB	BB	BB	BB	BB	BB	BB	BB	BB	BB	BB	BB	BB	BB	BB	NC	BB	BB	BB	BB	BB	BB	BB	BB	BB	BB	BB	BB	BB
chr2_8322896_A_G	2	8322896	BOT	[T/C]	BB	BB	BB	BB	BB	BB	BB	BB	BB	BB	BB	BB	BB	BB	BB	BB	BB	BB	BB	BB	BB	BB	BB	BB	BB	BB	BB	BB	BB	BB	BB	BB	BB	BB	BB	BB	BB	BB	BB	BB	BB	BB	BB	BB	BB
chr2_8329307_C_T	2	8329307	TOP	[A/G]	AA	AA	AA	AA	AA	AA	AA	AA	AA	AA	AA	AA	AA	AA	AA	AA	AA	AA	AA	AA	AA	AA	AA	AA	AA	AA	AA	AA	AA	AA	AA	AA	AA	AA	AA	AA	AA	AA	AA	AA	AA	AA	AA	AA	AA
chr2_8347472_C_T	2	8347472	TOP	[A/G]	AB	BB	BB	AB	BB	AB	AA	AB	AB	AB	AB	AB	AB	AB	AB	AB	AB	BB	BB	BB	AB	AB	AB	AA	AA	BB	AB	AB	AB	AA	AB	NC	AB	BB	BB	BB	BB	AA	AB	AB	AB	AB	BB	AA	BB
chr2_836697_A_G	2	836697	TOP	[A/G]	AA	AA	AA	AA	AA	AA	AA	AA	AA	AA	AA	AA	AA	AA	AA	AA	AA	AA	AA	AA	AA	AA	AA	AA	AA	AA	AA	AA	AA	AA	AA	AA	AA	AA	AA	AA	AA	AA	AA	AA	AA	AA	AA	AA	AA
chr2_8381864_C_T	2	8381864	TOP	[A/G]	AB	BB	BB	AB	BB	AB	AA	AB	AB	AB	AB	AB	AB	AB	AB	AB	AB	BB	BB	BB	AB	AB	AB	AA	AA	BB	AB	AB	AB	AA	AB	BB	AB	BB	BB	BB	BB	AA	AB	AB	AB	AB	BB	AA	BB
chr2_8438220_C_T	2	8438220	TOP	[A/G]	AB	AA	AA	AB	AA	AB	BB	AB	AB	AB	AB	AB	AB	AB	AB	AB	AB	AA	AA	AA	AB	AB	AB	BB	BB	AA	AB	AB	AB	BB	AB	AA	AB	AA	AA	AA	AA	BB	AB	AB	AB	AB	AA	BB	AA
chr2_8440413_C_T	2	8440413	BOT	[T/C]	AB	AA	AA	AB	AA	AB	BB	AB	AB	AB	AB	AB	AB	AB	AB	AB	AB	AA	AA	AA	AB	AB	AB	BB	BB	AA	AB	AB	AB	BB	AB	AA	AB	AA	AA	AA	AA	BB	AB	AB	AB	AB	AA	BB	AA
chr2_8470895_A_G	2	8470895	TOP	[A/G]	BB	BB	BB	BB	BB	BB	BB	BB	BB	BB	BB	BB	BB	BB	BB	BB	BB	BB	BB	BB	BB	BB	BB	BB	BB	BB	BB	BB	BB	BB	BB	BB	BB	BB	BB	BB	BB	BB	BB	BB	BB	BB	BB	BB	BB
chr2_8521452_A_C	2	8521452	BOT	[T/G]	AA	AA	AA	AA	AA	AA	AA	AA	AA	AA	AA	AA	AA	AA	AA	AA	AA	AA	AA	AA	AA	AA	AA	AA	AA	AA	AA	AA	AA	AA	AA	NC	AA	AA	AA	AA	AA	AA	AA	AA	AA	AA	AA	AA	AA
chr2_8538748_A_G	2	8538748	TOP	[A/G]	BB	BB	BB	BB	BB	BB	BB	BB	BB	BB	BB	BB	BB	BB	BB	BB	BB	BB	BB	BB	BB	BB	BB	BB	BB	BB	BB	BB	BB	BB	BB	BB	BB	BB	BB	BB	BB	BB	BB	BB	BB	BB	BB	BB	BB
chr2_856575_C_T	2	856575	BOT	[T/C]	AA	AA	AA	AA	AA	AA	AA	AA	AA	AA	AA	AA	AA	AA	AA	AA	AA	AA	AA	AA	AA	AA	AA	AA	AA	AA	AA	AA	AA	AA	AA	AA	AA	AA	AA	AA	AA	AA	AA	AA	AA	AA	AA	AA	AA
chr2_8567027_C_T	2	8567027	BOT	[T/C]	AA	AA	AA	AA	AA	AA	AA	AA	AA	AA	AA	AA	AA	AA	AA	AA	AA	AA	AA	AA	AA	AA	AA	AA	AA	AA	AA	AA	AA	AA	AA	AA	AA	AA	AA	AA	AA	AA	AA	AA	AA	AA	AA	AA	AA
chr2_8569987_C_T	2	8569987	BOT	[T/C]	BB	BB	BB	BB	BB	BB	BB	BB	BB	BB	BB	BB	BB	BB	BB	BB	BB	BB	BB	BB	BB	BB	BB	BB	BB	BB	BB	BB	BB	BB	BB	BB	BB	BB	BB	BB	BB	BB	BB	BB	BB	BB	BB	BB	BB
chr2_8582944_A_G	2	8582944	BOT	[T/C]	BB	BB	BB	BB	BB	BB	BB	BB	BB	BB	BB	BB	BB	BB	BB	BB	BB	BB	BB	BB	BB	BB	BB	BB	BB	BB	BB	BB	BB	BB	BB	BB	BB	BB	BB	BB	BB	BB	BB	BB	BB	BB	BB	BB	BB
be_A_G_chr2_8632188	2	8632188	BOT	[T/C]	AA	AA	AA	AA	AA	AA	AA	AA	AA	AA	AA	AA	AA	AA	AA	AA	AA	AA	AA	AA	AA	AA	AA	AA	AA	AA	AA	AA	AA	AA	AA	AA	AA	AA	AA	AA	AA	AA	AA	AA	AA	AA	AA	AA	AA
lb_C_T_chr2_8635442	2	8635442	BOT	[T/C]	BB	BB	BB	BB	BB	BB	BB	BB	BB	BB	BB	BB	BB	BB	BB	BB	BB	BB	BB	BB	BB	BB	BB	BB	BB	BB	BB	BB	BB	BB	BB	NC	BB	BB	BB	BB	BB	BB	BB	BB	BB	BB	BB	BB	BB
cn_C_T_chr2_8693554	2	8693554	BOT	[T/C]	BB	BB	BB	BB	BB	BB	BB	BB	BB	BB	BB	BB	BB	BB	BB	BB	BB	BB	BB	BB	BB	BB	BB	BB	BB	BB	BB	BB	BB	BB	BB	BB	BB	BB	BB	BB	BB	BB	BB	BB	BB	BB	BB	BB	BB
chr2_8742380_G_T	2	8742380	TOP	[A/C]	AA	AA	AA	AA	AA	AA	AA	AA	AA	AA	AA	AA	AA	AA	AA	AA	AA	AA	AA	AA	AA	AA	AA	AA	AA	AA	AA	AA	AA	AA	AA	AA	AA	AA	AA	AA	AA	AA	AA	AA	AA	AA	AA	AA	AA
chr2_8757865_C_T	2	8757865	TOP	[A/G]	BB	BB	BB	BB	BB	BB	BB	BB	BB	BB	BB	BB	BB	BB	BB	BB	BB	BB	BB	BB	BB	BB	BB	BB	BB	BB	BB	BB	BB	BB	BB	BB	BB	BB	BB	BB	BB	BB	BB	BB	BB	BB	BB	BB	BB
chr2_879924_A_G	2	879924	BOT	[T/C]	AA	AA	AA	AA	AA	AA	AA	AA	AA	AA	AA	AA	AA	AA	AA	AA	AA	AA	AA	AA	AA	AA	AA	AA	AA	AA	AA	AA	AA	AA	AA	AA	AA	AA	AA	AA	AA	AA	AA	AA	AA	AA	AA	AA	AA
chr2_8810865_C_T	2	8810865	TOP	[A/G]	AA	AA	AA	AA	AA	AA	AA	AA	AA	AA	AA	AA	AA	AA	AA	AA	AA	AA	AA	AA	AA	AA	AA	AA	AA	AA	AA	AA	AA	AA	AA	AA	AA	AA	AA	AA	AA	AA	AA	AA	AA	AA	AA	AA	AA
chr2_8828693_C_T	2	8828693	BOT	[T/C]	BB	BB	BB	BB	BB	BB	BB	BB	BB	BB	BB	BB	BB	BB	BB	BB	BB	BB	BB	BB	BB	BB	BB	BB	BB	BB	BB	BB	BB	BB	BB	BB	BB	BB	BB	BB	BB	BB	BB	BB	BB	BB	BB	BB	BB
chr2_883053_G_T	2	883053	TOP	[A/C]	AA	AA	AA	AA	AA	AA	AA	AA	AA	AA	AA	AA	AA	AA	AA	AA	AA	AA	AA	AA	AA	AA	AA	AA	AA	AA	AA	AA	AA	AA	AA	NC	AA	AA	AA	AA	AA	AA	AA	AA	AA	AA	AA	AA	AA
chr2_8852731_A_G	2	8852731	BOT	[T/C]	BB	BB	BB	BB	BB	BB	BB	BB	BB	BB	BB	BB	BB	BB	BB	BB	BB	BB	BB	BB	BB	BB	BB	BB	BB	BB	BB	BB	BB	BB	BB	BB	BB	BB	BB	BB	BB	BB	BB	BB	BB	BB	BB	BB	BB
chr2_8943456_A_G	2	8943456	BOT	[T/C]	AB	AA	AA	AB	AA	AB	BB	AB	AB	AB	AA	AB	AB	AB	AB	AB	AA	AB	AA	AA	AB	AB	AB	BB	BB	AA	AB	AB	AB	BB	AB	NC	AB	AA	AA	AA	AA	AB	AB	AB	AB	AB	AA	BB	AA
chr2_8971434_A_G	2	8971434	BOT	[T/C]	AA	AA	AA	AA	AA	AA	AA	AA	AA	AA	AA	AA	AA	AA	AA	AA	AA	AA	AA	AA	AA	AA	AA	AA	AA	AA	AA	AA	AA	AA	AA	AA	AA	AA	AA	AA	AA	AA	AA	AA	AA	AA	AA	AA	AA
chr2_8974123_A_C	2	8974123	TOP	[A/C]	BB	BB	BB	BB	BB	BB	BB	BB	BB	BB	BB	BB	BB	BB	BB	BB	BB	BB	BB	BB	BB	BB	BB	BB	BB	BB	BB	BB	BB	BB	BB	BB	BB	BB	BB	BB	BB	BB	BB	BB	BB	BB	BB	BB	BB
chr2_8975106_G_T	2	8975106	BOT	[T/G]	BB	BB	BB	BB	BB	BB	BB	BB	BB	BB	BB	BB	BB	BB	BB	BB	BB	BB	BB	BB	BB	BB	BB	BB	BB	BB	BB	BB	BB	BB	BB	BB	BB	BB	BB	BB	BB	BB	BB	BB	BB	BB	BB	BB	BB
chr2_9002325_A_C	2	9002325	BOT	[T/G]	BB	BB	BB	BB	BB	BB	BB	BB	BB	BB	BB	BB	BB	BB	BB	BB	BB	BB	BB	BB	BB	BB	BB	BB	BB	BB	BB	BB	BB	BB	BB	BB	BB	BB	BB	BB	BB	BB	BB	BB	BB	BB	BB	BB	BB
chr2_9135820_C_T	2	9135820	BOT	[T/C]	BB	BB	BB	BB	BB	BB	BB	BB	BB	BB	BB	BB	BB	BB	BB	BB	BB	BB	BB	BB	BB	BB	BB	BB	BB	BB	BB	BB	BB	BB	BB	BB	BB	BB	BB	BB	BB	BB	BB	BB	BB	BB	BB	BB	BB
chr2_9136972_A_C	2	9136972	BOT	[T/G]	AA	AA	AA	AA	AA	AA	AA	AA	AA	AA	AA	AA	AA	AA	AA	AA	AA	AA	AA	AA	AA	AA	AA	AA	AA	AA	AA	AA	AA	AA	AA	AA	AA	AA	AA	AA	AA	AA	AA	AA	AA	AA	AA	AA	AA
lb_T_C_chr2_9142160	2	9142160	BOT	[T/C]	AA	AA	AA	AA	AA	AA	AA	AA	AA	AA	AA	AA	AA	AA	AA	AA	AA	AA	AA	AA	AA	AA	AA	AA	AA	AA	AA	AA	AA	AA	AA	AA	AA	AA	AA	AA	AA	AA	AA	AA	AA	AA	AA	AA	AA
chr2_9143505_A_G	2	9143505	TOP	[A/G]	BB	BB	BB	BB	BB	BB	BB	BB	BB	BB	BB	BB	BB	BB	BB	BB	BB	BB	BB	BB	BB	BB	BB	BB	BB	BB	BB	BB	BB	BB	BB	BB	BB	BB	BB	BB	BB	BB	BB	BB	BB	BB	BB	BB	BB
be_T_C_chr2_9145821	2	9145821	TOP	[A/G]	AA	AA	AA	AA	AA	AA	AA	AA	AA	AA	AA	AA	AA	AA	AA	AA	AA	AA	AA	AA	AA	AA	AA	AA	AA	AA	AA	AA	AA	AA	AA	AA	AA	AA	AA	AA	AA	AA	AA	AA	AA	AA	AA	AA	AA
ae_C_A_chr2_9146205	2	9146205	TOP	[A/C]	BB	BB	BB	BB	BB	BB	BB	BB	BB	BB	BB	BB	BB	BB	BB	BB	BB	BB	BB	BB	BB	BB	BB	BB	BB	BB	BB	BB	BB	BB	BB	BB	BB	BB	BB	BB	BB	BB	BB	BB	BB	BB	BB	BB	BB
chr2_9223164_C_T	2	9223164	BOT	[T/C]	BB	BB	BB	BB	BB	BB	BB	BB	BB	BB	BB	BB	BB	BB	BB	BB	BB	BB	BB	BB	BB	BB	BB	BB	BB	BB	BB	BB	BB	BB	BB	BB	BB	BB	BB	BB	BB	BB	BB	BB	BB	BB	BB	BB	BB
chr2_9224040_A_G	2	9224040	TOP	[A/G]	BB	BB	BB	BB	BB	BB	BB	BB	BB	BB	BB	BB	BB	BB	BB	BB	BB	BB	BB	BB	BB	BB	BB	BB	BB	BB	BB	BB	BB	BB	BB	BB	BB	BB	BB	BB	BB	BB	BB	BB	BB	BB	BB	BB	BB
cn_T_G_chr2_9372941	2	9372941	BOT	[T/G]	AA	AA	AA	AA	AA	AA	AA	AA	AA	AA	AA	AA	AA	AA	AA	AA	AA	AA	AA	AA	AA	AA	AA	AA	AA	AA	AA	AA	AA	AA	AA	AA	AA	AA	AA	AA	AA	AA	AA	AA	AA	AA	AA	AA	AA
li_G_T_chr2_9378648	2	9378648	BOT	[T/G]	BB	BB	BB	BB	BB	BB	BB	BB	BB	BB	BB	BB	BB	BB	BB	BB	BB	BB	BB	BB	BB	BB	BB	BB	BB	BB	BB	BB	BB	BB	BB	BB	BB	BB	BB	BB	BB	BB	BB	BB	BB	BB	BB	BB	BB
ae_G_A_chr2_9411474	2	9411474	BOT	[T/C]	BB	BB	BB	BB	BB	BB	BB	BB	BB	BB	BB	BB	BB	BB	BB	BB	BB	BB	BB	BB	BB	BB	BB	BB	BB	BB	BB	BB	BB	BB	BB	BB	BB	BB	BB	BB	BB	BB	BB	BB	BB	BB	BB	BB	BB
be_C_T_chr2_9637154	2	9637154	TOP	[A/G]	BB	BB	BB	BB	BB	BB	BB	BB	BB	BB	BB	BB	BB	BB	BB	BB	BB	BB	BB	BB	BB	BB	BB	BB	BB	BB	BB	BB	BB	BB	BB	BB	BB	BB	BB	BB	BB	BB	BB	BB	BB	BB	BB	BB	BB
chr2_971913_A_G	2	971913	BOT	[T/C]	AA	AA	AA	AA	AA	AA	AA	AA	AA	AA	AA	AA	AA	AA	AA	AA	AA	AA	AA	AA	AA	AA	AA	AA	AA	AA	AA	AA	AA	AA	AA	AA	AA	AA	AA	AA	AA	AA	AA	AA	AA	AA	AA	AA	AA
chr2_983238_C_T	2	983238	TOP	[A/G]	BB	BB	BB	BB	BB	BB	BB	BB	BB	BB	BB	BB	BB	BB	BB	BB	BB	BB	BB	BB	BB	BB	BB	BB	BB	BB	BB	BB	BB	BB	BB	BB	BB	BB	BB	BB	BB	BB	BB	BB	BB	BB	BB	BB	BB
cn_T_C_chr3_10007428	3	10007428	BOT	[T/C]	AA	AA	AA	AA	AA	AA	AA	AA	AA	AA	AA	AA	AA	AA	AA	AA	AA	AA	AA	AA	AA	AA	AA	AA	AA	AA	AA	AA	AA	AA	AA	AA	AA	AA	AA	AA	AA	AA	AA	AA	AA	AA	AA	AA	AA
chr3_10009802_A_G	3	10009802	TOP	[A/G]	BB	BB	BB	BB	BB	BB	BB	BB	BB	BB	BB	BB	BB	BB	BB	BB	BB	BB	BB	BB	BB	BB	BB	BB	BB	BB	BB	BB	BB	BB	BB	BB	BB	BB	BB	BB	BB	BB	BB	BB	BB	BB	BB	BB	BB
chr3_10012810_A_G	3	10012810	BOT	[T/C]	AB	AA	AA	AA	AB	AA	AB	AB	AA	AB	AA	AB	AB	AB	AA	BB	AB	BB	AB	AB	AB	AB	AB	AB	AA	AB	AA	BB	AA	AB	AB	AB	AA	AB	AB	AB	AB	AB	BB	AA	BB	AB	AB	AB	AA
chr3_10044379_C_T	3	10044379	BOT	[T/C]	AB	BB	BB	BB	AB	BB	AB	AB	BB	AB	BB	AB	AB	AB	BB	AA	AB	AA	AB	AB	AB	AB	AB	AB	BB	AB	BB	AA	BB	AB	AB	AB	BB	AB	AB	AB	AB	AB	AA	BB	AA	AB	AB	AB	BB
chr3_10044942_A_C	3	10044942	BOT	[T/G]	AA	AA	AA	AA	AA	AA	AA	AA	AA	AA	AA	AA	AA	AA	AA	AA	AA	AA	AA	AA	AA	AA	AA	AA	AA	AA	AA	AA	AA	AA	AA	AA	AA	AA	AA	AA	AA	AA	AA	AA	AA	AA	AA	AA	AA
chr3_1019198_A_C	3	1019198	BOT	[T/G]	BB	AB	AB	AB	AB	AB	BB	AB	AB	AB	BB	AB	AB	AB	AB	AB	BB	AA	BB	BB	AB	BB	AB	BB	AA	BB	AB	BB	AB	AB	BB	NC	AB	BB	AB	AB	AB	BB	BB	AB	BB	AA	AA	AB	AA
chr3_1026112_G_T	3	1026112	BOT	[T/G]	AA	AB	AB	AB	AB	AB	AA	AB	AB	AB	AA	AB	AB	AB	AB	AB	AA	BB	AA	AA	AB	AA	AB	AA	BB	AA	AB	AA	AB	AB	AA	NC	AB	AA	AB	AB	AB	AA	AA	AB	AA	BB	BB	AB	BB
chr3_1039399_A_G	3	1039399	TOP	[A/G]	AA	AA	AA	AA	AA	AA	AA	AA	AA	AA	AA	AA	AA	AA	AA	AA	AA	AA	AA	AA	AA	AA	AA	AA	AA	AA	AA	AA	AA	AA	AA	AA	AA	AA	AA	AA	AA	AA	AA	AA	AA	AA	AA	AA	AA
chr3_1042855_A_G	3	1042855	TOP	[A/G]	AA	AA	AA	AA	AA	AA	AA	AA	AA	AA	AA	AA	AA	AA	AA	AA	AA	AA	AA	AA	AA	AA	AA	AA	AA	AA	AA	AA	AA	AA	AA	AA	AA	AA	AA	AA	AA	AA	AA	AA	AA	AA	AA	AA	AA
cn_T_C_chr3_10706070	3	10706070	BOT	[T/C]	BB	BB	BB	BB	BB	BB	BB	BB	BB	BB	BB	BB	BB	BB	BB	BB	BB	BB	BB	BB	BB	BB	BB	BB	BB	BB	BB	BB	BB	BB	BB	BB	BB	BB	BB	BB	BB	BB	BB	BB	BB	BB	BB	BB	BB
chr3_10715509_A_C	3	10715509	TOP	[A/C]	BB	BB	BB	BB	BB	BB	BB	BB	BB	BB	BB	BB	BB	BB	BB	BB	BB	BB	BB	BB	BB	BB	BB	BB	BB	BB	BB	BB	BB	BB	BB	BB	BB	BB	BB	BB	BB	BB	BB	BB	BB	BB	BB	BB	BB
mu_o_C_A_chr3_10781460	3	10781460	TOP	[A/C]	BB	BB	BB	BB	BB	BB	BB	BB	BB	BB	BB	BB	BB	BB	BB	BB	BB	BB	BB	BB	BB	BB	BB	BB	BB	BB	BB	BB	BB	BB	BB	BB	BB	BB	BB	BB	BB	BB	BB	BB	BB	BB	BB	BB	BB
chr3_10781461_A_G	3	10781461	TOP	[A/G]	BB	BB	BB	BB	BB	BB	BB	BB	BB	BB	BB	BB	BB	BB	BB	BB	BB	BB	BB	BB	BB	BB	BB	BB	BB	BB	BB	BB	BB	BB	BB	BB	BB	BB	BB	BB	BB	BB	BB	BB	BB	BB	BB	BB	BB
chr3_10784037_G_T	3	10784037	TOP	[A/C]	AA	AA	AA	AA	AA	AA	AA	AA	AA	AA	AA	AA	AA	AA	AA	AA	AA	AA	AA	AA	AA	AA	AA	AA	AA	AA	AA	AA	AA	AA	AA	AA	AA	AA	AA	AA	AA	AA	AA	AA	AA	AA	AA	AA	AA
mu_o_T_C_chr3_10826181	3	10826181	TOP	[A/G]	AA	AA	AA	AA	AA	AA	AA	AA	AA	AA	AA	AA	AA	AA	AA	AA	AA	AA	AA	AA	AA	AA	AA	AA	AA	AA	AA	AA	AA	AA	AA	AA	AA	AA	AA	AA	AA	AA	AA	AA	AA	AA	AA	AA	AA
chr3_10844728_A_G	3	10844728	TOP	[A/G]	AA	AA	AA	AA	AA	AA	AA	AA	AA	AA	AA	AA	AA	AA	AA	AA	AA	AA	AA	AA	AA	AA	AA	AA	AA	AA	AA	AA	AA	AA	AA	AA	AA	AA	AA	AA	AA	AA	AA	AA	AA	AA	AA	AA	AA
chr3_10861993_G_T	3	10861993	TOP	[A/C]	AB	AA	AA	AA	AB	AA	AB	AB	AA	AB	AA	AB	AB	AB	AA	BB	AB	BB	AB	AB	AB	BB	AB	AB	AA	AB	AA	BB	AA	AB	AB	AB	AA	AB	AB	AB	AB	AB	BB	AA	BB	AB	AB	AB	AA
lb_T_C_chr3_10867226	3	10867226	TOP	[A/G]	AA	AA	AA	AA	AA	AA	AA	AA	AA	AA	AA	AA	AA	AA	AA	AA	AA	AA	AA	AA	AA	AA	AA	AA	AA	AA	AA	AA	AA	AA	AA	AA	AA	AA	AA	AA	AA	AA	AA	AA	AA	AA	AA	AA	AA
chr3_10903864_A_G	3	10903864	TOP	[A/G]	BB	BB	BB	BB	BB	BB	BB	BB	BB	BB	BB	BB	BB	BB	BB	BB	BB	BB	BB	BB	BB	BB	BB	BB	BB	BB	BB	BB	BB	BB	BB	BB	BB	BB	BB	BB	BB	BB	BB	BB	BB	BB	BB	BB	BB
chr3_10922298_A_G	3	10922298	TOP	[A/G]	AB	BB	BB	BB	AB	BB	AB	AB	BB	NC	AB	AB	AB	AB	BB	AA	AB	AA	AB	AB	AB	AA	AB	AB	BB	AB	BB	AA	BB	AB	AB	AB	BB	AB	AB	AB	AB	AB	AA	BB	AA	AB	AB	AB	BB
chr3_10923290_A_G	3	10923290	BOT	[T/C]	BB	BB	BB	BB	BB	BB	BB	BB	BB	BB	BB	BB	BB	BB	BB	BB	BB	BB	BB	BB	BB	BB	BB	BB	BB	BB	BB	BB	BB	BB	BB	BB	BB	BB	BB	BB	BB	BB	BB	BB	BB	BB	BB	BB	BB
chr3_10926634_C_T	3	10926634	BOT	[T/C]	BB	BB	BB	BB	BB	BB	BB	BB	BB	BB	BB	BB	BB	BB	BB	BB	BB	BB	BB	BB	BB	BB	BB	BB	BB	BB	BB	BB	BB	BB	BB	BB	BB	BB	BB	BB	BB	BB	BB	BB	BB	BB	BB	BB	BB
chr3_10932464_C_T	3	10932464	BOT	[T/C]	AB	BB	BB	BB	AB	BB	AB	AB	BB	NC	AB	AB	AB	AB	BB	AA	AB	AA	AB	AB	AB	AA	AB	AB	BB	AB	BB	AA	BB	AB	AB	AB	BB	AB	AB	AB	AB	AB	AA	BB	AA	AB	AB	AB	BB
chr3_10961604_A_C	3	10961604	TOP	[A/C]	AB	AA	AA	AA	AB	AA	AB	AB	AA	AB	AB	AB	AB	AB	AA	BB	AB	BB	AB	AB	AB	BB	AB	AB	AA	AB	AA	BB	AA	AB	AB	AB	AA	AB	AB	AB	AB	AB	BB	AA	BB	AB	AB	AB	AA
chr3_10962318_C_T	3	10962318	BOT	[T/C]	BB	BB	BB	BB	BB	BB	BB	BB	BB	BB	BB	BB	BB	BB	BB	BB	BB	BB	BB	BB	BB	BB	BB	BB	BB	BB	BB	BB	BB	BB	BB	BB	BB	BB	BB	BB	BB	BB	BB	BB	BB	BB	BB	BB	BB
chr3_10998147_C_T	3	10998147	BOT	[T/C]	AB	BB	BB	BB	AB	BB	AB	AB	BB	AB	AB	AB	AB	AB	BB	AA	AB	AA	AB	AB	AB	AA	AB	AB	BB	AB	BB	AA	BB	AB	AB	AB	BB	AB	AB	AB	AB	AB	AA	BB	AA	AB	AB	AB	BB
chr3_10999911_A_C	3	10999911	TOP	[A/C]	AB	BB	BB	BB	AB	BB	AB	AB	BB	AB	AB	AB	AB	AB	BB	AA	AB	AA	AB	AB	AB	AA	AB	AB	BB	AB	BB	AA	BB	AB	AB	AB	BB	AB	AB	AB	AB	AB	AA	BB	AA	AB	AB	AB	BB
mu_o_C_T_chr3_11116714	3	11116714	TOP	[A/G]	BB	BB	BB	BB	BB	BB	BB	BB	BB	BB	BB	BB	BB	BB	BB	BB	BB	BB	BB	BB	BB	BB	BB	BB	BB	BB	BB	BB	BB	BB	BB	BB	BB	BB	BB	BB	BB	BB	BB	BB	BB	BB	BB	BB	BB
mu_o_A_G_chr3_11119632	3	11119632	BOT	[T/C]	AA	AA	AA	AA	AA	AA	AA	AA	AA	AA	AA	AA	AA	AA	AA	AA	AA	AA	AA	AA	AA	AA	AA	AA	AA	AA	AA	AA	AA	AA	AA	AA	AA	AA	AA	AA	AA	AA	AA	AA	AA	AA	AA	AA	AA
chr3_11140085_C_T	3	11140085	TOP	[A/G]	NC	AA	AA	AA	AB	AA	AB	AB	AA	NC	AB	AB	AB	AB	AA	BB	AB	BB	AB	AB	AB	BB	AB	AB	AA	AB	AA	BB	AA	AB	AB	AB	AA	AB	AB	AB	AB	AB	BB	AA	BB	AB	AB	AB	AA
chr3_11151860_A_G	3	11151860	TOP	[A/G]	AA	AA	AA	AA	AA	AA	AA	AA	AA	AA	AA	AA	AA	AA	AA	AA	AA	AA	AA	AA	AA	AA	AA	AA	AA	AA	AA	AA	AA	AA	AA	AA	AA	AA	AA	AA	AA	AA	AA	AA	AA	AA	AA	AA	AA
chr3_11159524_A_G	3	11159524	TOP	[A/G]	BB	AA	AA	AA	AB	AA	AB	AB	AA	NC	AB	AB	AB	AB	AA	BB	AB	BB	AB	AB	AB	BB	AB	AB	AA	AB	AA	BB	AA	AB	AB	AB	AA	AB	AB	AB	AB	AB	BB	AA	BB	AB	AB	AB	AA
cn_A_G_chr3_11175713	3	11175713	BOT	[T/C]	AA	AA	AA	AA	AA	AA	AA	AA	AA	AA	AA	AA	AA	AA	AA	AA	AA	AA	AA	AA	AA	AA	AA	AA	AA	AA	AA	AA	AA	AA	AA	AA	AA	AA	AA	AA	AA	AA	AA	AA	AA	AA	AA	AA	AA
chr3_11182998_A_G	3	11182998	TOP	[A/G]	NC	BB	BB	BB	AB	BB	AB	AB	BB	NC	AA	AB	AB	AB	BB	AA	AB	AA	AB	AB	AB	AA	AB	AB	BB	AB	BB	AA	BB	AB	AB	AB	BB	AB	AB	AB	AB	AB	AA	BB	AA	AB	AB	AB	BB
chr3_11197334_C_T	3	11197334	BOT	[T/C]	AB	AA	AA	AA	AB	AA	AB	AB	AA	AB	AB	AB	AB	AB	AA	AB	AB	AB	AB	AB	AB	AB	AB	AB	AA	AB	AA	AB	AA	AB	AB	AB	AA	AB	AB	AB	AB	AB	AB	AA	AB	AB	AB	AB	AA
chr3_11238850_G_T	3	11238850	TOP	[A/C]	BB	BB	BB	BB	BB	BB	BB	BB	BB	BB	BB	BB	BB	BB	BB	BB	BB	BB	BB	BB	BB	BB	BB	BB	BB	BB	BB	BB	BB	BB	BB	BB	BB	BB	BB	BB	BB	BB	BB	BB	BB	BB	BB	BB	BB
chr3_11292294_G_T	3	11292294	BOT	[T/G]	NC	BB	BB	BB	AB	BB	AB	AB	BB	AB	AA	AB	AB	AB	BB	AA	AB	AA	AB	AB	AB	AA	AB	AB	BB	AB	BB	AA	BB	AB	AB	AB	BB	AB	AB	AB	AB	AB	AA	BB	AA	AB	AB	AB	BB
chr3_11295332_C_T	3	11295332	BOT	[T/C]	BB	AA	AA	AA	AB	AA	AB	AB	AA	AB	BB	AB	AB	AB	AA	BB	AB	BB	AB	AB	AB	BB	AB	AB	AA	AB	AA	BB	AA	AB	AB	AB	AA	AB	AB	AB	AB	AB	BB	AA	BB	AB	AB	AB	AA
be_T_G_chr3_11310454	3	11310454	BOT	[T/G]	AA	AA	AA	AA	AA	AA	AA	AA	AA	AA	AA	AA	AA	AA	AA	AA	AA	AA	AA	AA	AA	AA	AA	AA	AA	AA	AA	AA	AA	AA	AA	AA	AA	AA	AA	AA	AA	AA	AA	AA	AA	AA	AA	AA	AA
lb_C_T_chr3_11350309	3	11350309	TOP	[A/G]	BB	BB	BB	BB	BB	BB	BB	BB	BB	BB	BB	BB	BB	BB	BB	BB	BB	BB	BB	BB	BB	BB	BB	BB	BB	BB	BB	BB	BB	BB	BB	BB	BB	BB	BB	BB	BB	BB	BB	BB	BB	BB	BB	BB	BB
chr3_11666874_C_T	3	11666874	BOT	[T/C]	BB	BB	BB	BB	BB	BB	BB	BB	BB	BB	BB	BB	BB	BB	BB	BB	BB	BB	BB	BB	BB	BB	BB	BB	BB	BB	BB	BB	BB	BB	BB	BB	BB	BB	BB	BB	BB	BB	BB	BB	BB	BB	BB	BB	BB
chr3_11672220_A_C	3	11672220	TOP	[A/C]	BB	BB	BB	BB	BB	BB	BB	BB	BB	BB	BB	BB	BB	BB	BB	BB	BB	BB	BB	BB	BB	BB	BB	BB	BB	BB	BB	BB	BB	BB	BB	BB	BB	BB	BB	BB	BB	BB	BB	BB	BB	BB	BB	BB	BB
chr3_11687812_G_T	3	11687812	BOT	[T/G]	AB	BB	BB	BB	AB	BB	AB	AB	BB	AB	BB	AB	AB	AB	BB	AA	AB	AA	AB	AB	AB	AB	AB	AB	BB	AB	BB	AA	BB	AB	AB	AB	BB	AB	AB	AB	AB	AB	AA	BB	AA	AB	AB	AB	BB
chr3_11702596_A_G	3	11702596	BOT	[T/C]	AB	BB	BB	BB	AB	BB	AB	AB	BB	NC	BB	AB	AB	AB	BB	AA	AB	AA	AB	AB	AB	AB	AB	AB	BB	AB	BB	AA	BB	AB	AB	AB	BB	AB	AB	AB	AB	AB	AA	BB	AA	AB	AB	AB	BB
chr3_11703031_C_T	3	11703031	TOP	[A/G]	AA	AA	AA	AA	AA	AA	AA	AA	AA	AA	AA	AA	AA	AA	AA	AA	AA	AA	AA	AA	AA	AA	AA	AA	AA	AA	AA	AA	AA	AA	AA	AA	AA	AA	AA	AA	AA	AA	AA	AA	AA	AA	AA	AA	AA
be_C_T_chr3_11739288	3	11739288	TOP	[A/G]	BB	BB	BB	BB	BB	BB	BB	BB	BB	BB	BB	BB	BB	BB	BB	BB	BB	BB	BB	BB	BB	BB	BB	BB	BB	BB	BB	BB	BB	BB	BB	BB	BB	BB	BB	BB	BB	BB	BB	BB	BB	BB	BB	BB	BB
ae_A_G_chr3_11779551	3	11779551	BOT	[T/C]	AA	AA	AA	AA	AA	AA	AA	AA	AA	AA	AA	AA	AA	AA	AA	AA	AA	AA	AA	AA	AA	AA	AA	AA	AA	AA	AA	AA	AA	AA	AA	AA	AA	AA	AA	AA	AA	AA	AA	AA	AA	AA	AA	AA	AA
chr3_118182_C_T	3	118182	BOT	[T/C]	AA	AA	AA	AA	AA	AA	AA	AA	AA	AA	AA	AA	AA	AA	AA	AA	AA	AA	AA	AA	AA	AA	AA	AA	AA	AA	AA	AA	AA	AA	AA	AA	AA	AA	AA	AA	AA	AA	AA	AA	AA	AA	AA	AA	AA
lb_G_A_chr3_11820026	3	11820026	TOP	[A/G]	BB	BB	BB	BB	BB	BB	BB	BB	BB	BB	BB	BB	BB	BB	BB	BB	BB	BB	BB	BB	BB	BB	BB	BB	BB	BB	BB	BB	BB	BB	BB	BB	BB	BB	BB	BB	BB	BB	BB	BB	BB	BB	BB	BB	BB
lb_C_T_chr3_1220643	3	1220643	TOP	[A/G]	BB	BB	BB	BB	BB	BB	BB	BB	BB	BB	BB	BB	BB	BB	BB	BB	BB	BB	BB	BB	BB	BB	BB	BB	BB	BB	BB	BB	BB	BB	BB	BB	BB	BB	BB	BB	BB	BB	BB	BB	BB	BB	BB	BB	BB
be_T_G_chr3_12208763	3	12208763	BOT	[T/G]	AA	AA	AA	AA	AA	AA	AA	AA	AA	AA	AA	AA	AA	AA	AA	AA	AA	AA	AA	AA	AA	AA	AA	AA	AA	AA	AA	AA	AA	AA	AA	AA	AA	AA	AA	AA	AA	AA	AA	AA	AA	AA	AA	AA	AA
mu_s_T_C_chr3_12211242	3	12211242	BOT	[T/C]	AA	AA	AA	AA	AA	AA	AA	AA	AA	AA	AA	AA	AA	AA	AA	AA	AA	AA	AA	AA	AA	AA	AA	AA	AA	AA	AA	AA	AA	AA	AA	AA	AA	AA	AA	AA	AA	AA	AA	AA	AA	AA	AA	AA	AA
chr3_12256711_A_C	3	12256711	TOP	[A/C]	AB	AB	AB	AB	AB	AB	AB	AB	NC	AB	AB	AB	AB	AB	AB	BB	AB	BB	AB	AB	AB	AB	AB	AB	AB	AB	AB	BB	AB	AB	AB	AB	AB	AB	AB	AB	AB	AB	BB	AB	BB	AB	AB	AB	AB
mu_o_G_A_chr3_12259809	3	12259809	BOT	[T/C]	BB	BB	BB	BB	BB	BB	BB	BB	BB	BB	BB	BB	BB	BB	BB	BB	BB	BB	BB	BB	BB	BB	BB	BB	BB	BB	BB	BB	BB	BB	BB	BB	BB	BB	BB	BB	BB	BB	BB	BB	BB	BB	BB	BB	BB
ae_C_A_chr3_12292441	3	12292441	BOT	[T/G]	BB	BB	BB	BB	BB	BB	BB	BB	BB	BB	BB	BB	BB	BB	BB	BB	BB	BB	BB	BB	BB	BB	BB	BB	BB	BB	BB	BB	BB	BB	BB	BB	BB	BB	BB	BB	BB	BB	BB	BB	BB	BB	BB	BB	BB
chr3_1242683_A_G	3	1242683	BOT	[T/C]	BB	AB	AB	AB	AB	AB	BB	AB	AB	AB	BB	AB	AB	AB	AB	AB	BB	AA	BB	BB	AB	BB	AB	BB	AA	BB	AB	BB	AB	AB	BB	NC	AB	BB	AB	AB	AB	BB	BB	AB	BB	AA	AA	AB	AA
chr3_124430_A_G	3	124430	BOT	[T/C]	BB	BB	BB	BB	BB	BB	BB	BB	BB	BB	BB	BB	BB	BB	BB	BB	BB	BB	BB	BB	BB	BB	BB	BB	BB	BB	BB	BB	BB	BB	BB	BB	BB	BB	BB	BB	BB	BB	BB	BB	BB	BB	BB	BB	BB
chr3_1255784_A_G	3	1255784	TOP	[A/G]	AA	AA	AA	AA	AA	AA	AA	AA	AA	AA	AA	AA	AA	AA	AA	AA	AA	AA	AA	AA	AA	AA	AA	AA	AA	AA	AA	AA	AA	AA	AA	AA	AA	AA	AA	AA	AA	AA	AA	AA	AA	AA	AA	AA	AA
chr3_1271560_C_T	3	1271560	BOT	[T/C]	AA	AB	AB	AB	AB	AB	AA	AB	AB	AB	AA	AB	AB	AB	AB	AB	AA	BB	AA	AA	AB	AA	AB	AA	BB	AA	AB	AA	AB	AB	AA	NC	AB	AA	AB	AB	AB	AA	AA	AB	AA	BB	BB	AB	BB
chr3_1284509_A_G	3	1284509	TOP	[A/G]	AA	AA	AA	AA	AA	AA	AA	AA	AA	AA	AA	AA	AA	AA	AA	AA	AA	AA	AA	AA	AA	AA	AA	AA	AA	AA	AA	AA	AA	AA	AA	AA	AA	AA	AA	AA	AA	AA	AA	AA	AA	AA	AA	AA	AA
ae_C_T_chr3_1299778	3	1299778	BOT	[T/C]	BB	BB	BB	BB	BB	BB	BB	BB	BB	BB	BB	BB	BB	BB	BB	BB	BB	BB	BB	BB	BB	BB	BB	BB	BB	BB	BB	BB	BB	BB	BB	BB	BB	BB	BB	BB	BB	BB	BB	BB	BB	BB	BB	BB	BB
chr3_1307969_A_C	3	1307969	TOP	[A/C]	AA	AA	AA	AA	AA	AA	AA	AA	AA	AA	AA	AA	AA	AA	AA	AA	AA	AA	AA	AA	AA	AA	AA	AA	AA	AA	AA	AA	AA	AA	AA	NC	AA	AA	AA	AA	AA	AA	AA	AA	AA	AA	AA	AA	AA
chr3_13092285_C_T	3	13092285	TOP	[A/G]	AB	BB	AB	AB	AB	AB	BB	AB	AB	AB	AB	AB	AB	AB	AB	AB	AB	AB	AB	AB	AB	AB	BB	BB	AB	AB	BB	AB	AB	AB	AB	AB	AB	BB	AB	AB	AB	AB	AB	BB	AB	BB	AB	AB	AB
chr3_1320707_C_T	3	1320707	BOT	[T/C]	AA	AB	AB	AB	AB	AB	AA	AB	AB	AB	AA	AB	AB	AB	AB	AB	AA	BB	AA	AA	AB	AA	AB	AA	BB	AA	AB	AA	AB	AB	AA	NC	AB	AA	AB	AB	AB	AA	AA	AB	AA	BB	BB	AB	BB
ae_T_C_chr3_13237815	3	13237815	BOT	[T/C]	AA	AA	AA	AA	AA	AA	AA	AA	AA	AA	AA	AA	AA	AA	AA	AA	AA	AA	AA	AA	AA	AA	AA	AA	AA	AA	AA	AA	AA	AA	AA	AA	AA	AA	AA	AA	AA	AA	AA	AA	AA	AA	AA	AA	AA
be_G_A_chr3_13237910	3	13237910	BOT	[T/C]	BB	BB	BB	BB	BB	BB	BB	BB	BB	BB	BB	BB	BB	BB	BB	BB	BB	BB	BB	BB	BB	BB	BB	BB	BB	BB	BB	BB	BB	BB	BB	BB	BB	BB	BB	BB	BB	BB	BB	BB	BB	BB	BB	BB	BB
chr3_1335413_A_C	3	1335413	BOT	[T/G]	BB	AB	AB	AB	AB	AB	BB	AB	AB	AB	BB	AB	AB	AB	AB	AB	BB	AA	BB	BB	AB	BB	AB	BB	AA	BB	AB	BB	AB	AB	BB	NC	AB	BB	AB	AB	AB	BB	BB	AB	BB	AA	AA	AB	AA
li_G_A_chr3_13431692	3	13431692	TOP	[A/G]	BB	BB	BB	BB	BB	BB	BB	BB	BB	BB	BB	BB	BB	BB	BB	BB	BB	BB	BB	BB	BB	BB	BB	BB	BB	BB	BB	BB	BB	BB	BB	BB	BB	BB	BB	BB	BB	BB	BB	BB	BB	BB	BB	BB	BB
SNP613_315	3	1348328	BOT	[T/C]	BB	BB	BB	BB	BB	BB	BB	BB	BB	BB	BB	BB	BB	BB	BB	BB	BB	BB	BB	BB	BB	BB	BB	BB	BB	BB	BB	BB	BB	BB	BB	NC	BB	BB	BB	BB	BB	BB	BB	BB	BB	BB	BB	BB	BB
chr3_13521238_C_T	3	13521238	TOP	[A/G]	AA	AA	AA	AA	AA	AA	AA	AA	AA	AA	AA	AA	AA	AA	AA	AA	AA	AA	AA	AA	AA	AA	AA	AA	AA	AA	AA	AA	AA	AA	AA	AA	AA	AA	AA	AA	AA	AA	AA	AA	AA	AA	AA	AA	AA
chr3_1358572_G_T	3	1358572	TOP	[A/C]	BB	BB	BB	BB	BB	BB	BB	BB	BB	BB	BB	BB	BB	BB	BB	BB	BB	BB	BB	BB	BB	BB	BB	BB	BB	BB	BB	BB	BB	BB	BB	NC	BB	BB	BB	BB	BB	BB	BB	BB	BB	BB	BB	BB	BB
chr3_1362562_G_T	3	1362562	BOT	[T/G]	AA	AB	AB	AB	AB	AB	AA	AB	AB	AB	AA	AB	AB	AB	AB	AB	AA	BB	AA	AA	AB	AA	AB	AA	BB	AA	AB	AA	AB	AB	AA	NC	AB	AA	AB	AB	AB	AA	AA	AB	AA	BB	BB	AB	BB
lb_C_A_chr3_14243476	3	14243476	BOT	[T/G]	BB	BB	BB	BB	BB	BB	BB	BB	BB	BB	BB	BB	BB	BB	BB	BB	BB	BB	BB	BB	BB	BB	BB	BB	BB	BB	BB	BB	BB	BB	BB	BB	BB	BB	BB	BB	BB	BB	BB	BB	BB	BB	BB	BB	BB
chr3_1427914_C_T	3	1427914	TOP	[A/G]	AA	AB	AB	AB	AB	AB	AA	AB	AB	AB	AA	AB	AB	AB	AB	AB	AA	BB	AA	AA	AB	AA	AB	AA	BB	AA	AB	AA	AB	AB	AA	BB	AB	AA	AB	AB	AB	AA	AA	AB	AA	BB	BB	AB	BB
cn_C_T_chr3_14336788	3	14336788	TOP	[A/G]	BB	BB	BB	BB	BB	BB	BB	BB	BB	BB	BB	BB	BB	BB	BB	BB	BB	BB	BB	BB	BB	BB	BB	BB	BB	BB	BB	BB	BB	BB	BB	BB	BB	BB	BB	BB	BB	BB	BB	BB	BB	BB	BB	BB	BB
chr3_1436981_A_G	3	1436981	TOP	[A/G]	BB	BB	BB	BB	BB	BB	BB	BB	BB	BB	BB	BB	BB	BB	BB	BB	BB	BB	BB	BB	BB	BB	BB	BB	BB	BB	BB	BB	BB	BB	BB	BB	BB	BB	BB	BB	BB	BB	BB	BB	BB	BB	BB	BB	BB
chr3_1442283_C_T	3	1442283	TOP	[A/G]	BB	AB	AB	AB	AB	AB	BB	AB	AB	AB	BB	AB	AB	AB	AB	AB	BB	AA	BB	BB	AB	BB	AB	BB	AA	BB	AB	BB	AB	AB	BB	NC	AB	BB	AB	AB	AB	BB	BB	AB	BB	AA	AA	AB	AA
chr3_14558685_G_T	3	14558685	TOP	[A/C]	AA	AA	AA	AA	AA	AA	AA	AA	AA	AA	AA	AA	AA	AA	AA	AA	AA	AA	AA	AA	AA	AA	AA	AA	AA	AA	AA	AA	AA	AA	AA	AA	AA	AA	AA	AA	AA	AA	AA	AA	AA	AA	AA	AA	AA
chr3_14573785_A_G	3	14573785	TOP	[A/G]	BB	BB	BB	BB	BB	BB	BB	BB	BB	BB	BB	BB	BB	BB	BB	BB	BB	BB	BB	BB	BB	BB	BB	BB	BB	BB	BB	BB	BB	BB	BB	BB	BB	BB	BB	BB	BB	BB	BB	BB	BB	BB	BB	BB	BB
chr3_14579673_A_C	3	14579673	BOT	[T/G]	BB	BB	BB	BB	BB	BB	BB	BB	BB	BB	BB	BB	BB	BB	BB	BB	BB	BB	BB	BB	BB	BB	BB	BB	BB	BB	BB	BB	BB	BB	BB	BB	BB	BB	BB	BB	BB	BB	BB	BB	BB	BB	BB	BB	BB
be_G_A_chr3_14639693	3	14639693	TOP	[A/G]	BB	BB	BB	BB	BB	BB	BB	BB	BB	BB	BB	BB	BB	BB	BB	BB	BB	BB	BB	BB	BB	BB	BB	BB	BB	BB	BB	BB	BB	BB	BB	BB	BB	BB	BB	BB	BB	BB	BB	BB	BB	BB	BB	BB	BB
lb_A_G_chr3_14705508	3	14705508	BOT	[T/C]	AA	AA	AA	AA	AA	AA	AA	AA	AA	AA	AA	AA	AA	AA	AA	AA	AA	AA	AA	AA	AA	AA	AA	AA	AA	AA	AA	AA	AA	AA	AA	AA	AA	AA	AA	AA	AA	AA	AA	AA	AA	AA	AA	AA	AA
chr3_1480217_C_T	3	1480217	TOP	[A/G]	AA	AA	AA	AA	AA	AA	AA	AA	AA	AA	AA	AA	AA	AA	AA	AA	AA	AA	AA	AA	AA	AA	AA	AA	AA	AA	AA	AA	AA	AA	AA	AA	AA	AA	AA	AA	AA	AA	AA	AA	AA	AA	AA	AA	AA
li_C_T_chr3_14805589	3	14805589	TOP	[A/G]	AA	AA	AA	AA	AA	AA	AA	AA	AA	AA	AA	AA	AA	AA	AA	AA	AA	AA	AA	AA	AA	AA	AA	AA	AA	AA	AA	AA	AA	AA	AA	AA	AA	AA	AA	AA	AA	AA	AA	AA	AA	AA	AA	AA	AA
chr3_1495511_A_G	3	1495511	BOT	[T/C]	AA	AB	AB	AB	AB	AB	AA	AB	AB	AB	AA	AB	AB	AB	AB	AB	AA	BB	AA	AA	AB	AA	AB	AA	BB	AA	AB	AA	AB	AB	AA	NC	AB	AA	AB	AB	AB	AA	AA	AB	AA	BB	BB	AB	BB
be_G_A_chr3_15086488	3	15086488	TOP	[A/G]	AA	AA	AA	AA	AA	AA	AA	AA	AA	AA	AA	AA	AA	AA	AA	AA	AA	AA	AA	AA	AA	AA	AA	AA	AA	AA	AA	AA	AA	AA	AA	AA	AA	AA	AA	AA	AA	AA	AA	AA	AA	AA	AA	AA	AA
ae_T_C_chr3_15121970	3	15121970	BOT	[T/C]	AA	AA	AA	AA	AA	AA	AA	AA	AA	AA	AA	AA	AA	AA	AA	AA	AA	AA	AA	AA	AA	AA	AA	AA	AA	AA	AA	AA	AA	AA	AA	AA	AA	AA	AA	AA	AA	AA	AA	AA	AA	AA	AA	AA	AA
chr3_1521234_C_T	3	1521234	BOT	[T/C]	BB	BB	BB	BB	BB	BB	BB	BB	BB	BB	BB	BB	BB	BB	BB	BB	BB	BB	BB	BB	BB	BB	BB	BB	BB	BB	BB	BB	BB	BB	BB	BB	BB	BB	BB	BB	BB	BB	BB	BB	BB	BB	BB	BB	BB
chr3_1523291_C_T	3	1523291	TOP	[A/G]	BB	BB	BB	BB	BB	BB	BB	BB	BB	BB	BB	BB	BB	BB	BB	BB	BB	BB	BB	BB	BB	BB	BB	BB	BB	BB	BB	BB	BB	BB	BB	BB	BB	BB	BB	BB	BB	BB	BB	BB	BB	BB	BB	BB	BB
cn_C_T_chr3_15425566	3	15425566	BOT	[T/C]	BB	BB	BB	BB	BB	BB	BB	BB	BB	BB	BB	BB	BB	BB	BB	BB	BB	BB	BB	BB	BB	BB	BB	BB	BB	BB	BB	BB	BB	BB	BB	BB	BB	BB	BB	BB	BB	BB	BB	BB	BB	BB	BB	BB	BB
chr3_1549536_C_T	3	1549536	BOT	[T/C]	BB	AB	AB	AB	AB	AB	BB	AB	AB	AB	BB	AB	AB	AB	AB	AB	BB	AA	BB	BB	AB	BB	AB	BB	AA	BB	AB	BB	AB	AB	BB	NC	AB	BB	AB	AB	AB	BB	BB	AB	BB	AA	AA	AB	AA
lb_A_C_chr3_15707482	3	15707482	TOP	[A/C]	AA	AA	AA	AA	AA	AA	AA	AA	AA	AA	AA	AA	AA	AA	AA	AA	AA	AA	AA	AA	AA	AA	AA	AA	AA	AA	AA	AA	AA	AA	AA	AA	AA	AA	AA	AA	AA	AA	AA	AA	AA	AA	AA	AA	AA
chr3_1575451_A_G	3	1575451	TOP	[A/G]	AA	AB	AB	AB	AB	AB	AA	AB	AB	AB	AA	AB	AB	AB	AB	AB	AA	BB	AA	AA	AB	AA	AB	AA	BB	AA	AB	AA	AB	AB	AA	BB	AB	AA	AB	AB	AB	AA	AA	AB	AA	BB	BB	AB	BB
cn_C_A_chr3_15869139	3	15869139	TOP	[A/C]	BB	BB	BB	BB	BB	BB	BB	BB	BB	BB	BB	BB	BB	BB	BB	BB	BB	BB	BB	BB	BB	BB	BB	BB	BB	BB	BB	BB	BB	BB	BB	BB	BB	BB	BB	BB	BB	BB	BB	BB	BB	BB	BB	BB	BB
chr3_1600410_A_G	3	1600410	TOP	[A/G]	BB	AB	AB	AB	AB	AB	BB	AB	AB	AB	BB	AB	AB	AB	AB	AB	BB	AA	BB	BB	AB	BB	AB	BB	AA	BB	AB	BB	AB	AB	BB	NC	AB	BB	AB	AB	AB	BB	BB	AB	BB	AA	AA	AB	AA
be_C_A_chr3_16054319	3	16054319	TOP	[A/C]	BB	BB	BB	BB	BB	BB	BB	BB	BB	BB	BB	BB	BB	BB	BB	BB	BB	BB	BB	BB	BB	BB	BB	BB	BB	BB	BB	BB	BB	BB	BB	BB	BB	BB	BB	BB	BB	BB	BB	BB	BB	BB	BB	BB	BB
lb_G_T_chr3_16133045	3	16133045	BOT	[T/G]	BB	BB	BB	BB	BB	BB	BB	BB	BB	BB	BB	BB	BB	BB	BB	BB	BB	BB	BB	BB	BB	BB	BB	BB	BB	BB	BB	BB	BB	BB	BB	BB	BB	BB	BB	BB	BB	BB	BB	BB	BB	BB	BB	BB	BB
ae_T_C_chr3_16164211	3	16164211	TOP	[A/G]	AA	AA	AA	AA	AA	AA	AA	AA	AA	AA	AA	AA	AA	AA	AA	AA	AA	AA	AA	AA	AA	AA	AA	AA	AA	AA	AA	AA	AA	AA	AA	AA	AA	AA	AA	AA	AA	AA	AA	AA	AA	AA	AA	AA	AA
cn_C_T_chr3_16229046	3	16229046	TOP	[A/G]	BB	BB	BB	BB	BB	BB	BB	BB	BB	AB	BB	BB	AB	BB	BB	BB	BB	BB	BB	AB	BB	BB	BB	BB	BB	BB	BB	BB	BB	BB	AB	BB	BB	BB	BB	BB	BB	BB	BB	BB	AB	BB	BB	BB	BB
chr3_1626682_C_T	3	1626682	BOT	[T/C]	BB	BB	BB	BB	BB	BB	BB	BB	BB	BB	BB	BB	BB	BB	BB	BB	BB	BB	BB	BB	BB	BB	BB	BB	BB	BB	BB	BB	BB	BB	BB	BB	BB	BB	BB	BB	BB	BB	BB	BB	BB	BB	BB	BB	BB
chr3_1628436_A_G	3	1628436	BOT	[T/C]	BB	AB	AB	AB	AB	AB	BB	AB	AB	AB	BB	AB	AB	AB	AB	AB	BB	AA	BB	BB	AB	BB	AB	BB	AA	BB	AB	BB	AB	AB	BB	NC	AB	BB	AB	AB	AB	BB	BB	AB	BB	AA	AA	AB	AA
chr3_16341764_C_T	3	16341764	TOP	[A/G]	AA	AA	AA	AA	AA	AA	AA	AA	AA	AA	AA	AA	AA	AA	AA	AA	AA	AA	AA	AA	AA	AA	AA	AA	AA	AA	AA	AA	AA	AA	AA	AA	AA	AA	AA	AA	AA	AA	AA	AA	AA	AA	AA	AA	AA
chr3_16341944_A_C	3	16341944	TOP	[A/C]	AA	AA	AA	AA	AA	AA	AA	AA	AA	AA	AA	AA	AA	AA	AA	AA	AA	AA	AA	AA	AA	AA	AA	AA	AA	AA	AA	AA	AA	AA	AA	AA	AA	AA	AA	AA	AA	AA	AA	AA	AA	AA	AA	AA	AA
chr3_16344837_A_G	3	16344837	TOP	[A/G]	BB	BB	BB	BB	BB	BB	BB	BB	BB	BB	BB	BB	BB	BB	BB	BB	BB	BB	BB	BB	BB	BB	BB	BB	BB	BB	BB	BB	BB	BB	BB	NC	BB	BB	BB	BB	BB	BB	BB	BB	BB	BB	BB	BB	BB
chr3_16378142_A_G	3	16378142	BOT	[T/C]	AB	BB	BB	BB	AB	BB	AB	AB	BB	AB	BB	AB	AB	AB	BB	AA	AB	AA	AB	AB	AB	AB	AB	AB	BB	AB	BB	AB	BB	BB	AB	AB	BB	AB	BB	AB	BB	BB	AB	BB	AA	AB	AB	AB	BB
chr3_16381418_A_G	3	16381418	BOT	[T/C]	AB	AA	AA	AA	AB	AA	AB	AB	AA	AB	AA	AB	AB	AB	AA	BB	AB	BB	AB	AB	AB	AB	AB	AB	AA	AB	AA	AB	AA	AA	AB	AB	AA	AB	AA	AB	AA	AA	AB	AA	BB	AB	AB	AB	AA
chr3_16420484_C_T	3	16420484	BOT	[T/C]	BB	BB	BB	BB	BB	BB	BB	BB	BB	BB	BB	BB	BB	BB	BB	BB	BB	BB	BB	BB	BB	BB	BB	BB	BB	BB	BB	BB	BB	BB	BB	BB	BB	BB	BB	BB	BB	BB	BB	BB	BB	BB	BB	BB	BB
chr3_16431576_A_C	3	16431576	TOP	[A/C]	AA	AA	AA	AA	AA	AA	AA	AA	AA	AA	AA	AA	AA	AA	AA	AA	AA	AA	AA	AA	AA	AA	AA	AA	AA	AA	AA	AA	AA	AA	AA	AA	AA	AA	AA	AA	AA	AA	AA	AA	AA	AA	AA	AA	AA
mu_o_C_T_chr3_16432475	3	16432475	TOP	[A/G]	BB	BB	BB	BB	BB	BB	BB	BB	BB	BB	BB	BB	BB	BB	BB	BB	BB	BB	BB	BB	BB	BB	BB	BB	BB	BB	BB	BB	BB	BB	BB	BB	BB	BB	BB	BB	BB	BB	BB	BB	BB	BB	BB	BB	BB
chr3_16437361_A_C	3	16437361	TOP	[A/C]	AA	AA	AA	AA	AA	AA	AA	AA	AA	AA	AA	AA	AA	AA	AA	AA	AA	AA	AA	AA	AA	AA	AA	AA	AA	AA	AA	AA	AA	AA	AA	AA	AA	AA	AA	AA	AA	AA	AA	AA	AA	AA	AA	AA	AA
chr3_1652982_G_T	3	1652982	BOT	[T/G]	AA	AB	AB	AB	AB	AB	AA	AB	AB	AB	AA	AB	AB	AB	AB	AB	AA	BB	AA	AA	AB	AA	AB	AA	BB	AA	AB	AA	AB	AB	AA	NC	AB	AA	AB	AB	AB	AA	AA	AB	AA	BB	BB	AB	BB
chr3_16593567_A_G	3	16593567	BOT	[T/C]	BB	BB	BB	BB	BB	BB	BB	BB	BB	BB	BB	BB	BB	BB	BB	BB	BB	BB	BB	BB	BB	BB	BB	BB	BB	BB	BB	BB	BB	BB	BB	BB	BB	BB	BB	BB	BB	BB	BB	BB	BB	BB	BB	BB	BB
mu_o_T_C_chr3_16640974	3	16640974	TOP	[A/G]	AA	AA	AA	AA	AA	AA	AA	AA	AA	AA	AA	AA	AA	AA	AA	AA	AA	AA	AA	AA	AA	AA	AA	AA	AA	AA	AA	AA	AA	AA	AA	AA	AA	AA	AA	AA	AA	AA	AA	AA	AA	AA	AA	AA	AA
lb_C_A_chr3_16660035	3	16660035	TOP	[A/C]	AA	AA	AA	AA	AA	AA	AA	AA	AA	AA	AA	AA	AA	AA	AA	AA	AA	AA	AA	AA	AA	AA	AA	AA	AA	AA	AA	AA	AA	AA	AA	AA	AA	AA	AA	AA	AA	AA	AA	AA	AA	AA	AA	AA	AA
chr3_16717391_C_T	3	16717391	BOT	[T/C]	AA	AA	AA	AA	AA	AA	AA	AA	AA	AA	AA	AA	AA	AA	AA	AA	AA	AA	AA	AA	AA	AA	AA	AA	AA	AA	AA	AA	AA	AA	AA	AA	AA	AA	AA	AA	AA	AA	AA	AA	AA	AA	AA	AA	AA
chr3_16721456_A_G	3	16721456	BOT	[T/C]	AB	BB	BB	BB	AB	BB	AB	AB	BB	AB	BB	AB	AB	AB	BB	AA	AB	AA	AB	AB	AB	AB	AB	AB	BB	AB	BB	AB	BB	BB	AB	AB	BB	AB	BB	AB	BB	BB	AB	BB	AA	AB	AB	AB	BB
chr3_1672399_C_T	3	1672399	BOT	[T/C]	AA	AB	AB	AB	AB	AB	AA	AB	AB	AB	AA	AB	AB	AB	AB	AB	AA	BB	AA	AA	AB	AA	AB	AA	BB	AA	AB	AA	AB	AB	AA	NC	AB	AA	AB	AB	AB	AA	AA	AB	AA	BB	BB	AB	BB
cn_C_T_chr3_16757242	3	16757242	TOP	[A/G]	BB	BB	BB	BB	BB	BB	BB	BB	BB	BB	BB	BB	BB	BB	BB	BB	BB	BB	BB	BB	BB	BB	BB	BB	BB	BB	BB	BB	BB	BB	BB	BB	BB	BB	BB	BB	BB	BB	BB	BB	BB	BB	BB	BB	BB
cn_G_A_chr3_1678144	3	1678144	BOT	[T/C]	BB	BB	BB	BB	BB	BB	BB	BB	BB	BB	BB	BB	BB	BB	BB	BB	BB	BB	BB	BB	BB	BB	BB	BB	BB	BB	BB	BB	BB	BB	BB	BB	BB	BB	BB	BB	BB	BB	BB	BB	BB	BB	BB	BB	BB
chr3_1680734_C_T	3	1680734	BOT	[T/C]	BB	AB	AB	AB	AB	AB	BB	AB	AB	AB	BB	AB	AB	AB	AB	AB	BB	AA	BB	BB	AB	BB	AB	BB	AA	BB	AB	BB	AB	AB	BB	NC	AB	BB	AB	AB	AB	BB	BB	AB	BB	AA	AA	AB	AA
be_T_C_chr3_1682509	3	1682509	TOP	[A/G]	AA	AA	AA	AA	AA	AA	AA	AA	AA	AA	AA	AA	AA	AA	AA	AA	AA	AA	AA	AA	AA	AA	AA	AA	AA	AA	AA	AA	AA	AA	AA	AA	AA	AA	AA	AA	AA	AA	AA	AA	AA	AA	AA	AA	AA
chr3_16863619_A_G	3	16863619	BOT	[T/C]	BB	BB	BB	BB	BB	BB	BB	BB	BB	BB	BB	BB	BB	BB	BB	BB	BB	BB	BB	BB	BB	BB	BB	BB	BB	BB	BB	BB	BB	BB	BB	BB	BB	BB	BB	BB	BB	BB	BB	BB	BB	BB	BB	BB	BB
lb_T_C_chr3_1687731	3	1687731	TOP	[A/G]	AA	AA	AA	AA	AA	AA	AA	AA	AA	AA	AA	AA	AA	AA	AA	AA	AA	AA	AA	AA	AA	AA	AA	AA	AA	AA	AA	AA	AA	AA	AA	AA	AA	AA	AA	AA	AA	AA	AA	AA	AA	AA	AA	AA	AA
ae_T_C_chr3_1688390	3	1688390	TOP	[A/G]	AA	AA	AA	AA	AA	AA	AA	AA	AA	AA	AA	AA	AA	AA	AA	AA	AA	NC	AA	AA	AA	AA	AA	AA	NC	AA	AA	AA	AA	AA	AA	AA	AA	AA	AA	AA	AA	AA	AA	AA	AA	NC	NC	AA	NC
chr3_16939028_A_G	3	16939028	BOT	[T/C]	BB	BB	BB	BB	BB	BB	BB	BB	BB	BB	BB	BB	BB	BB	BB	AA	BB	AA	BB	BB	BB	BB	BB	BB	BB	BB	BB	BB	BB	BB	BB	AB	BB	BB	BB	BB	BB	BB	BB	BB	AA	BB	BB	BB	BB
chr3_16945908_A_G	3	16945908	TOP	[A/G]	AA	AA	AA	AA	AA	AA	AA	AA	AA	AA	AA	AA	AA	AA	AA	AA	AA	AA	AA	AA	AA	AA	AA	AA	AA	AA	AA	AA	AA	AA	AA	AA	AA	AA	AA	AA	AA	AA	AA	AA	AA	AA	AA	AA	AA
chr3_16946190_A_G	3	16946190	TOP	[A/G]	AA	AA	AA	AA	AA	AA	AA	AA	AA	AA	AA	AA	AA	AA	AA	AA	AA	AA	AA	AA	AA	AA	AA	AA	AA	AA	AA	AA	AA	AA	AA	AA	AA	AA	AA	AA	AA	AA	AA	AA	AA	AA	AA	AA	AA
chr3_16951631_A_G	3	16951631	TOP	[A/G]	AB	AA	AA	AA	AB	AA	AB	AB	AA	AB	AA	AB	AB	AB	AA	BB	AB	BB	AB	AB	AB	AB	AB	AB	AA	AB	AA	AB	AA	AA	AB	AB	AA	AB	AA	AB	AA	AA	AB	AA	BB	AB	AB	AB	AA
chr3_16980757_C_T	3	16980757	BOT	[T/C]	BB	BB	BB	BB	BB	BB	BB	BB	BB	BB	BB	BB	BB	BB	BB	BB	BB	BB	BB	BB	BB	BB	BB	BB	BB	BB	BB	BB	BB	BB	BB	BB	BB	BB	BB	BB	BB	BB	BB	BB	BB	BB	BB	BB	BB
ae_G_T_chr3_17134310	3	17134310	BOT	[T/G]	AA	AA	AA	AA	AA	AA	AA	AA	AA	AA	AA	AA	AA	AA	AA	AA	AA	AA	AA	AA	AA	AA	AA	AA	AA	AA	AA	AA	AA	AA	AA	NC	AA	AA	AA	AA	AA	AA	AA	AA	AA	AA	AA	AA	AA
chr3_17166683_A_G	3	17166683	TOP	[A/G]	AB	BB	BB	BB	AB	BB	AB	AB	BB	NC	BB	AB	AB	AB	BB	AA	AB	AA	AB	AB	AB	AB	AB	AB	BB	AB	BB	AB	BB	BB	AB	AB	BB	AB	BB	AB	BB	BB	AB	BB	AA	AB	AB	AB	BB
chr3_17213328_C_T	3	17213328	BOT	[T/C]	AA	AA	AA	AA	AA	AA	AA	AA	AA	AA	AA	AA	AA	AA	AA	AA	AA	AA	AA	AA	AA	AA	AA	AA	AA	AA	AA	AA	AA	AA	AA	NC	AA	AA	AA	AA	AA	AA	AA	AA	AA	AA	AA	AA	AA
chr3_17217402_G_T	3	17217402	BOT	[T/G]	AA	AA	AA	AA	AA	AA	AA	AA	AA	AA	AA	AA	AA	AA	AA	AA	AA	AA	AA	AA	AA	AA	AA	AA	AA	AA	AA	AA	AA	AA	AA	AA	AA	AA	AA	AA	AA	AA	AA	AA	AA	AA	AA	AA	AA
chr3_1722578_A_G	3	1722578	TOP	[A/G]	AA	AB	AB	AB	AB	AB	AA	AB	AB	AB	AA	AB	AB	AB	AB	AB	AA	BB	AA	AA	AB	AA	AB	AA	BB	AA	AB	AA	AB	AB	AA	AB	AB	AA	AB	AB	AB	AA	AA	AB	AA	BB	BB	AB	BB
chr3_1724872_A_C	3	1724872	TOP	[A/C]	BB	BB	BB	BB	BB	BB	BB	BB	BB	BB	BB	BB	BB	BB	BB	BB	BB	BB	BB	BB	BB	BB	BB	BB	BB	BB	BB	BB	BB	BB	BB	BB	BB	BB	BB	BB	BB	BB	BB	BB	BB	BB	BB	BB	BB
chr3_17270399_C_T	3	17270399	TOP	[A/G]	AA	AA	AA	AA	AA	AA	AA	AA	AA	AA	AA	AA	AA	AA	AA	AA	AA	AA	AA	AA	AA	AA	AA	AA	AA	AA	AA	AA	AA	AA	AA	AA	AA	AA	AA	AA	AA	AA	AA	AA	AA	AA	AA	AA	AA
chr3_17273727_A_G	3	17273727	BOT	[T/C]	AA	AA	AA	AA	AA	AA	AA	AA	AA	AA	AA	AA	AA	AA	AA	AA	AA	AA	AA	AA	AA	AA	AA	AA	AA	AA	AA	AA	AA	AA	AA	AA	AA	AA	AA	AA	AA	AA	AA	AA	AA	AA	AA	AA	AA
chr3_17274011_A_G	3	17274011	TOP	[A/G]	AA	AA	AA	AA	AA	AA	AA	AA	AA	AA	AA	AA	AA	AA	AA	AA	AA	AA	AA	AA	AA	AA	AA	AA	AA	AA	AA	AA	AA	AA	AA	AA	AA	AA	AA	AA	AA	AA	AA	AA	AA	AA	AA	AA	AA
chr3_17300633_C_T	3	17300633	TOP	[A/G]	AA	AA	AA	AA	AA	AA	AA	AA	AA	AA	AA	AA	AA	AA	AA	AA	AA	AA	AA	AA	AA	AA	AA	AA	AA	AA	AA	AA	AA	AA	AA	AA	AA	AA	AA	AA	AA	AA	AA	AA	AA	AA	AA	AA	AA
chr3_1740981_C_T	3	1740981	BOT	[T/C]	AA	AA	AA	AA	AA	AA	AA	AA	AA	AA	AA	AA	AA	AA	AA	AA	AA	AA	AA	AA	AA	AA	AA	AA	AA	AA	AA	AA	AA	AA	AA	AA	AA	AA	AA	AA	AA	AA	AA	AA	AA	AA	AA	AA	AA
chr3_17488429_C_T	3	17488429	BOT	[T/C]	BB	BB	BB	BB	BB	BB	BB	BB	BB	BB	BB	BB	BB	BB	BB	BB	BB	BB	BB	BB	BB	BB	BB	BB	BB	BB	BB	BB	BB	BB	BB	BB	BB	BB	BB	BB	BB	BB	BB	BB	BB	BB	BB	BB	BB
chr3_17511365_A_G	3	17511365	TOP	[A/G]	BB	BB	BB	BB	BB	BB	BB	BB	BB	BB	BB	BB	BB	BB	BB	BB	BB	BB	BB	BB	BB	BB	BB	BB	BB	BB	BB	BB	BB	BB	BB	BB	BB	BB	BB	BB	BB	BB	BB	BB	BB	BB	BB	BB	BB
chr3_17520102_C_T	3	17520102	TOP	[A/G]	BB	BB	BB	BB	BB	BB	BB	BB	BB	BB	BB	BB	BB	BB	BB	BB	BB	BB	BB	BB	BB	BB	BB	BB	BB	BB	BB	BB	BB	BB	BB	BB	BB	BB	BB	BB	BB	BB	BB	BB	BB	BB	BB	BB	BB
chr3_1761193_G_T	3	1761193	BOT	[T/G]	AA	AB	AB	AB	AB	AB	AA	AB	AB	AB	AA	AB	AB	AB	AB	AB	AA	BB	AA	AA	AB	AA	AB	AA	BB	AA	AB	AA	AB	AB	AA	NC	AB	AA	AB	AB	AB	AA	AA	AB	AA	BB	BB	AB	BB
chr3_1772769_C_T	3	1772769	TOP	[A/G]	BB	AB	AB	AB	AB	AB	BB	AB	AB	AB	BB	AB	AB	AB	AB	AB	BB	AA	BB	BB	AB	BB	AB	BB	AA	BB	AB	BB	AB	AB	BB	NC	AB	BB	AB	AB	AB	BB	BB	AB	BB	AA	AA	AB	AA
chr3_17800427_A_G	3	17800427	BOT	[T/C]	BB	BB	BB	BB	BB	BB	BB	BB	BB	BB	BB	BB	BB	BB	BB	BB	BB	BB	BB	BB	BB	BB	BB	BB	BB	BB	BB	BB	BB	BB	BB	BB	BB	BB	BB	BB	BB	BB	BB	BB	BB	BB	BB	BB	BB
chr3_17820622_C_T	3	17820622	BOT	[T/C]	AB	AA	AA	AB	AB	AB	AB	AB	AA	AB	AA	AB	AB	AB	AA	BB	AB	BB	AB	AB	AB	AB	AB	AB	AA	AB	AA	AB	AB	AA	AB	AB	AA	AB	AA	AB	AA	AA	AB	AA	BB	BB	AB	AB	AB
chr3_17878823_A_G	3	17878823	BOT	[T/C]	AB	BB	BB	AB	AB	AB	AB	AB	BB	AB	BB	AB	AB	AB	BB	AA	AB	AA	AB	AB	AB	AB	AB	AB	BB	AB	BB	AB	AB	BB	AB	AB	BB	AB	BB	AB	BB	BB	AB	BB	AA	AA	AB	AB	AB
chr3_17878951_G_T	3	17878951	BOT	[T/G]	BB	BB	BB	BB	BB	BB	BB	BB	BB	BB	BB	BB	BB	BB	BB	BB	BB	BB	BB	BB	BB	BB	BB	BB	BB	BB	BB	BB	BB	BB	BB	BB	BB	BB	BB	BB	BB	BB	BB	BB	BB	BB	BB	BB	BB
chr3_17882474_A_G	3	17882474	TOP	[A/G]	BB	BB	BB	BB	BB	BB	BB	BB	BB	BB	BB	BB	BB	BB	BB	BB	BB	BB	BB	BB	BB	BB	BB	BB	BB	BB	BB	BB	BB	BB	BB	BB	BB	BB	BB	BB	BB	BB	BB	BB	BB	BB	BB	BB	BB
chr3_1789456_G_T	3	1789456	BOT	[T/G]	BB	AB	AB	AB	AB	AB	BB	AB	AB	AB	BB	AB	AB	AB	AB	AB	BB	AA	BB	BB	AB	BB	AB	BB	AA	BB	AB	BB	AB	AB	BB	NC	AB	BB	AB	AB	AB	BB	BB	AB	BB	AA	AA	AB	AA
chr3_17935812_C_T	3	17935812	TOP	[A/G]	AA	AA	AA	AA	AA	AA	AA	AA	AA	AA	AA	AA	AA	AA	AA	AA	AA	AA	AA	AA	AA	AA	AA	AA	AA	AA	AA	AA	AA	AA	AA	AA	AA	AA	AA	AA	AA	AA	AA	AA	AA	AA	AA	AA	AA
chr3_17947210_A_G	3	17947210	TOP	[A/G]	BB	BB	BB	BB	BB	BB	BB	BB	BB	BB	BB	BB	BB	BB	BB	BB	BB	BB	BB	BB	BB	BB	BB	BB	BB	BB	BB	BB	BB	BB	BB	BB	BB	BB	BB	BB	BB	BB	BB	BB	BB	BB	BB	BB	BB
chr3_17955706_C_T	3	17955706	BOT	[T/C]	AB	BB	BB	AB	AB	AB	AB	AB	BB	NC	BB	AB	AB	AB	BB	AA	AB	AA	AB	AB	AB	AB	AB	AB	BB	AB	BB	AB	AB	BB	AB	AB	BB	AB	BB	AB	BB	BB	AB	BB	AA	AA	AB	AB	AB
be_G_A_chr3_17969817	3	17969817	TOP	[A/G]	BB	BB	BB	BB	BB	BB	BB	BB	BB	BB	BB	BB	BB	BB	BB	BB	BB	BB	BB	BB	BB	BB	BB	BB	BB	BB	BB	BB	BB	BB	BB	BB	BB	BB	BB	BB	BB	BB	BB	BB	BB	BB	BB	BB	BB
chr3_17985343_A_G	3	17985343	TOP	[A/G]	AB	AA	AA	AB	AB	AB	AB	AB	AA	AB	AA	AB	AB	AB	AA	BB	AB	BB	AB	AB	AB	AB	AB	AB	AA	AB	AA	AB	AB	AA	AB	AB	AA	AB	AA	AB	AA	AA	AB	AA	BB	BB	AB	AB	AB
SNP1219_191	3	18008999	TOP	[A/G]	BB	BB	BB	BB	BB	BB	BB	BB	BB	BB	BB	BB	BB	BB	BB	BB	BB	BB	BB	BB	BB	BB	BB	BB	BB	BB	BB	BB	BB	BB	BB	NC	BB	BB	BB	BB	BB	BB	BB	BB	BB	BB	BB	BB	BB
chr3_18009357_A_G	3	18009357	TOP	[A/G]	AB	BB	BB	AB	AB	AB	AB	AB	BB	NC	BB	AB	AB	AB	BB	AA	AB	AA	AB	AB	AB	AB	AB	AB	BB	AB	BB	AB	AB	BB	AB	AB	BB	AB	BB	AB	BB	BB	AB	BB	AA	AA	AB	AB	AB
chr3_1815436_C_T	3	1815436	TOP	[A/G]	AA	AA	AA	AA	AA	AA	AA	AA	AA	AA	AA	AA	AA	AA	AA	AA	AA	AA	AA	AA	AA	AA	AA	AA	AA	AA	AA	AA	AA	AA	AA	AA	AA	AA	AA	AA	AA	AA	AA	AA	AA	AA	AA	AA	AA
chr3_18339411_A_G	3	18339411	TOP	[A/G]	AA	AA	AA	AA	AA	AA	AA	AA	AA	AA	AA	AA	AA	AA	AA	NC	AA	NC	AA	AA	AA	AA	AA	AA	AA	AA	AA	AA	AA	AA	AA	AB	AA	AA	AA	AA	AA	AA	AA	AA	NC	NC	AA	AA	AA
chr3_18346272_C_T	3	18346272	BOT	[T/C]	BB	BB	BB	BB	BB	BB	BB	BB	BB	BB	BB	BB	BB	BB	BB	BB	BB	BB	BB	BB	BB	BB	BB	BB	BB	BB	BB	BB	BB	BB	BB	BB	BB	BB	BB	BB	BB	BB	BB	BB	BB	BB	BB	BB	BB
chr3_18349893_C_T	3	18349893	BOT	[T/C]	AB	AA	AA	AB	AB	AB	AB	AB	AA	AB	AA	AB	AB	AB	AA	BB	AB	BB	AB	AB	AB	AB	AB	AB	AA	AB	AA	AB	AB	AA	AB	AB	AA	AB	AA	AB	AA	AA	AB	AA	BB	BB	AB	AB	AB
chr3_18356034_A_G	3	18356034	BOT	[T/C]	AB	BB	BB	AB	AB	AB	AB	AB	BB	AB	BB	AB	AB	AB	BB	AA	AB	AA	AB	AB	AB	AB	AB	AB	BB	AB	BB	AB	AB	BB	AB	AB	BB	AB	BB	AB	BB	BB	AB	BB	AA	AA	AB	AB	AB
chr3_1838068_C_T	3	1838068	TOP	[A/G]	BB	BB	BB	BB	BB	BB	BB	BB	BB	BB	BB	BB	BB	BB	BB	BB	BB	BB	BB	BB	BB	BB	BB	BB	BB	BB	BB	BB	BB	BB	BB	BB	BB	BB	BB	BB	BB	BB	BB	BB	BB	BB	BB	BB	BB
chr3_18405199_A_G	3	18405199	TOP	[A/G]	BB	BB	BB	BB	BB	BB	BB	BB	BB	BB	BB	BB	BB	BB	BB	BB	BB	BB	BB	BB	BB	BB	BB	BB	BB	BB	BB	BB	BB	BB	BB	BB	BB	BB	BB	BB	BB	BB	BB	BB	BB	BB	BB	BB	BB
chr3_18408810_C_T	3	18408810	BOT	[T/C]	BB	BB	BB	BB	BB	BB	BB	BB	BB	BB	BB	BB	BB	BB	BB	BB	BB	BB	BB	BB	BB	BB	BB	BB	BB	BB	BB	BB	BB	BB	BB	NC	BB	BB	BB	BB	BB	BB	BB	BB	BB	BB	BB	BB	BB
chr3_18452444_A_G	3	18452444	BOT	[T/C]	AA	AA	AA	AA	AA	AA	AA	AA	AA	AA	AA	AA	AA	AA	AA	AA	AA	AA	AA	AA	AA	AA	AA	AA	AA	AA	AA	AA	AA	AA	AA	AA	AA	AA	AA	AA	AA	AA	AA	AA	AA	AA	AA	AA	AA
chr3_18460170_C_T	3	18460170	TOP	[A/G]	AB	BB	BB	AB	AB	AB	AB	AB	BB	AB	BB	AB	AB	AB	BB	AA	AB	AA	AB	AB	AB	AB	AB	AB	BB	AB	BB	AB	AB	BB	AB	AB	BB	AB	BB	AB	BB	BB	AB	BB	AA	AA	AB	AB	AB
chr3_18461496_C_T	3	18461496	BOT	[T/C]	AB	BB	BB	AB	AB	AB	AB	AB	BB	NC	BB	AB	AB	AB	BB	AA	AB	AA	AB	AB	AB	AB	AB	AB	BB	AB	BB	AB	AB	BB	AB	AB	BB	AB	BB	AB	BB	BB	AB	BB	AA	AA	AB	AB	AB
ae_G_A_chr3_18510549	3	18510549	BOT	[T/C]	BB	BB	BB	BB	BB	BB	BB	BB	BB	BB	BB	BB	BB	BB	BB	BB	BB	BB	BB	BB	BB	BB	BB	BB	BB	BB	BB	BB	BB	BB	BB	BB	BB	BB	BB	BB	BB	BB	BB	BB	BB	BB	BB	BB	BB
chr3_18524367_A_G	3	18524367	TOP	[A/G]	AB	BB	BB	AB	AB	AB	AB	AB	BB	NC	BB	AB	AB	AB	BB	AA	AB	AA	AB	AB	AB	AB	AB	AB	BB	AB	BB	AB	AB	BB	AB	AB	BB	AB	BB	AB	BB	BB	AB	BB	AA	AA	AB	AB	AB
chr3_1868120_G_T	3	1868120	BOT	[T/G]	AA	AA	AA	AA	AA	AA	AA	AA	AA	AA	AA	AA	AA	AA	AA	AA	AA	AA	AA	AA	AA	AA	AA	AA	AA	AA	AA	AA	AA	AA	AA	AA	AA	AA	AA	AA	AA	AA	AA	AA	AA	AA	AA	AA	AA
chr3_1890842_A_G	3	1890842	TOP	[A/G]	AA	AB	AB	AB	AB	AB	AA	AB	AB	AB	AA	AB	AB	AB	AB	AB	AA	BB	AA	AA	AB	AA	AB	AA	BB	AA	AB	AA	AB	AB	AA	NC	AB	AA	AB	AB	AB	AA	AA	AB	AA	BB	BB	AB	BB
chr3_18911910_A_C	3	18911910	TOP	[A/C]	BB	BB	BB	BB	BB	BB	BB	BB	BB	BB	BB	BB	BB	BB	BB	BB	BB	BB	BB	BB	BB	BB	BB	BB	BB	BB	BB	BB	BB	BB	BB	BB	BB	BB	BB	BB	BB	BB	BB	BB	BB	BB	BB	BB	BB
chr3_18917037_A_G	3	18917037	TOP	[A/G]	AB	AA	AA	AB	AB	AB	AB	AB	AA	AB	AA	AB	AB	AB	AA	BB	AB	BB	AB	AB	AB	AB	AB	AB	AA	AB	AA	AB	AB	AA	AB	AB	AA	AB	AA	AB	AA	AA	AB	AA	BB	BB	AB	AB	AB
be_C_T_chr3_18933467	3	18933467	BOT	[T/C]	BB	BB	BB	BB	BB	BB	BB	BB	BB	BB	BB	BB	BB	BB	BB	BB	BB	BB	BB	BB	BB	BB	BB	BB	BB	BB	BB	BB	BB	BB	BB	BB	BB	BB	BB	BB	BB	BB	BB	BB	BB	BB	BB	BB	BB
chr3_18936610_C_T	3	18936610	TOP	[A/G]	BB	BB	BB	BB	BB	BB	BB	BB	BB	BB	BB	BB	BB	BB	BB	BB	BB	BB	BB	BB	BB	BB	BB	BB	BB	BB	BB	BB	BB	BB	BB	BB	BB	BB	BB	BB	BB	BB	BB	BB	BB	BB	BB	BB	BB
chr3_18944025_C_T	3	18944025	TOP	[A/G]	AB	BB	BB	AB	AB	AB	AB	AB	BB	AB	BB	AB	AB	AB	BB	AA	AB	AA	AB	AB	AB	AB	AB	AB	BB	AB	BB	AB	AB	BB	AB	AB	BB	AB	BB	AB	BB	BB	AB	BB	AA	AA	AB	AB	AB
ae_T_C_chr3_19068282	3	19068282	TOP	[A/G]	AA	AA	AA	AA	AA	AA	AA	AA	AA	AA	AA	AA	AA	AA	AA	AA	AA	AA	AA	AA	AA	AA	AA	AA	AA	AA	AA	AA	AA	AA	AA	AA	AA	AA	AA	AA	AA	AA	AA	AA	AA	AA	AA	AA	AA
chr3_19070804_A_C	3	19070804	BOT	[T/G]	AA	AA	AA	AA	AA	AA	AA	AA	AA	AA	AA	AA	AA	AA	AA	AA	AA	AA	AA	AA	AA	AA	AA	AA	AA	AA	AA	AA	AA	AA	AA	AA	AA	AA	AA	AA	AA	AA	AA	AA	AA	AA	AA	AA	AA
lb_T_C_chr3_19074700	3	19074700	TOP	[A/G]	AA	AA	AA	AA	AA	AA	AA	AA	AA	AA	AA	AA	AA	AA	AA	AA	AA	AA	AA	AA	AA	AA	AA	AA	AA	AA	AA	AA	AA	AA	AA	AA	AA	AA	AA	AA	AA	AA	AA	AA	AA	AA	AA	AA	AA
chr3_19088266_G_T	3	19088266	BOT	[T/G]	AB	BB	BB	AB	AB	AB	AB	AA	BB	AB	BB	AB	AB	AB	BB	AA	AB	AA	AB	AB	AB	AB	AB	AB	BB	AB	BB	AB	AB	BB	AB	AB	BB	AB	BB	AB	BB	BB	AB	BB	AA	AA	AB	AB	AB
chr3_19132857_C_T	3	19132857	BOT	[T/C]	BB	BB	BB	BB	BB	BB	BB	BB	BB	BB	BB	BB	BB	BB	BB	BB	BB	BB	BB	BB	BB	BB	BB	BB	BB	BB	BB	BB	BB	BB	BB	BB	BB	BB	BB	BB	BB	BB	BB	BB	BB	BB	BB	BB	BB
chr3_19135995_G_T	3	19135995	TOP	[A/C]	AB	AA	AA	AB	AB	AB	AB	BB	AA	AB	AA	AB	AB	AB	AA	BB	AB	BB	AB	AB	AB	AB	AB	AB	AA	AB	AA	AB	AB	AA	AB	AB	AA	AB	AA	AB	AA	AA	AB	AA	BB	BB	AB	AB	AB
chr3_19137319_G_T	3	19137319	BOT	[T/G]	AA	AA	AA	AA	AA	AA	AA	AA	AA	AA	AA	AA	AA	AA	AA	AA	AA	AA	AA	AA	AA	AA	AA	AA	AA	AA	AA	AA	AA	AA	AA	AA	AA	AA	AA	AA	AA	AA	AA	AA	AA	AA	AA	AA	AA
chr3_19174055_C_T	3	19174055	BOT	[T/C]	AB	BB	BB	AB	AB	AB	AB	AA	BB	NC	BB	AB	AB	AB	BB	AA	AB	AA	AB	AB	AB	AB	AB	AB	BB	AB	BB	AB	AB	BB	AB	AB	BB	AB	BB	AB	BB	BB	AB	BB	AA	AA	AB	AB	AB
chr3_19176311_A_C	3	19176311	TOP	[A/C]	AB	AA	AA	AB	AB	AB	AB	BB	AA	NC	AA	AB	AB	AB	AA	BB	AB	BB	AB	AB	AB	AB	AB	AB	AA	AB	AA	AB	AB	AA	AB	AB	AA	AB	AA	AB	AA	AA	AB	AA	BB	BB	AB	AB	AB
chr3_19195612_A_G	3	19195612	BOT	[T/C]	BB	BB	BB	BB	BB	BB	BB	BB	BB	BB	BB	BB	BB	BB	BB	BB	BB	BB	BB	BB	BB	BB	BB	BB	BB	BB	BB	BB	BB	BB	BB	BB	BB	BB	BB	BB	BB	BB	BB	BB	BB	BB	BB	BB	BB
chr3_19209269_A_C	3	19209269	BOT	[T/G]	AA	AA	AA	AA	AA	AA	AA	AA	AA	AA	AA	AA	AA	AA	AA	AA	AA	AA	AA	AA	AA	AA	AA	AA	AA	AA	AA	AA	AA	AA	AA	AA	AA	AA	AA	AA	AA	AA	AA	AA	AA	AA	AA	AA	AA
chr3_19235239_A_G	3	19235239	TOP	[A/G]	BB	BB	BB	BB	BB	BB	BB	BB	BB	BB	BB	BB	BB	BB	BB	BB	BB	BB	BB	BB	BB	BB	BB	BB	BB	BB	BB	BB	BB	BB	BB	BB	BB	BB	BB	BB	BB	BB	BB	BB	BB	BB	BB	BB	BB
chr3_19236009_C_T	3	19236009	TOP	[A/G]	BB	BB	BB	BB	BB	BB	BB	BB	BB	BB	BB	BB	BB	BB	BB	BB	BB	BB	BB	BB	BB	BB	BB	BB	BB	BB	BB	BB	BB	BB	BB	BB	BB	BB	BB	BB	BB	BB	BB	BB	BB	BB	BB	BB	BB
chr3_19265041_C_T	3	19265041	TOP	[A/G]	BB	BB	BB	BB	BB	BB	BB	BB	BB	BB	BB	BB	BB	BB	BB	BB	BB	BB	BB	BB	BB	BB	BB	BB	BB	BB	BB	BB	BB	BB	BB	BB	BB	BB	BB	BB	BB	BB	BB	BB	BB	BB	BB	BB	BB
chr3_19281512_A_C	3	19281512	BOT	[T/G]	BB	BB	BB	BB	BB	BB	BB	BB	BB	BB	BB	BB	BB	BB	BB	BB	BB	BB	BB	BB	BB	BB	BB	BB	BB	BB	BB	BB	BB	BB	BB	BB	BB	BB	BB	BB	BB	BB	BB	BB	BB	BB	BB	BB	BB
chr3_19286107_A_G	3	19286107	TOP	[A/G]	BB	BB	BB	BB	BB	BB	BB	BB	BB	BB	BB	BB	BB	BB	BB	BB	BB	BB	BB	BB	BB	BB	BB	BB	BB	BB	BB	BB	BB	BB	BB	BB	BB	BB	BB	BB	BB	BB	BB	BB	BB	BB	BB	BB	BB
chr3_1934488_A_G	3	1934488	BOT	[T/C]	BB	BB	BB	BB	BB	BB	BB	BB	BB	BB	BB	BB	BB	BB	BB	BB	BB	BB	BB	BB	BB	BB	BB	BB	BB	BB	BB	BB	BB	BB	BB	BB	BB	BB	BB	BB	BB	BB	BB	BB	BB	BB	BB	BB	BB
mu_s_A_G_chr3_1943448	3	1943448	TOP	[A/G]	AA	AA	AA	AA	AA	AA	AA	AA	AA	AA	AA	AA	AA	AA	AA	AA	AA	AA	AA	AA	AA	AA	AA	AA	AA	AA	AA	AA	AA	AA	AA	AA	AA	AA	AA	AA	AA	AA	AA	AA	AA	AA	AA	AA	AA
chr3_1945559_C_T	3	1945559	TOP	[A/G]	AA	AA	AA	AA	AA	AA	AA	AA	AA	AA	AA	AA	AA	AA	AA	AA	AA	AA	AA	AA	AA	AA	AA	AA	AA	AA	AA	AA	AA	AA	AA	AA	AA	AA	AA	AA	AA	AA	AA	AA	AA	AA	AA	AA	AA
chr3_1973273_C_T	3	1973273	BOT	[T/C]	BB	BB	BB	BB	BB	BB	BB	BB	BB	BB	BB	BB	BB	BB	BB	BB	BB	BB	BB	BB	BB	BB	BB	BB	BB	BB	BB	BB	BB	BB	BB	BB	BB	BB	BB	BB	BB	BB	BB	BB	BB	BB	BB	BB	BB
chr3_1976084_A_C	3	1976084	TOP	[A/C]	BB	BB	BB	BB	BB	BB	BB	BB	BB	BB	BB	BB	BB	BB	BB	BB	BB	BB	BB	BB	BB	BB	BB	BB	BB	BB	BB	BB	BB	BB	BB	BB	BB	BB	BB	BB	BB	BB	BB	BB	BB	BB	BB	BB	BB
chr3_2024611_A_C	3	2024611	TOP	[A/C]	BB	BB	BB	BB	BB	BB	BB	BB	BB	BB	BB	BB	BB	BB	BB	BB	BB	BB	BB	BB	BB	BB	BB	BB	BB	BB	BB	BB	BB	BB	BB	BB	BB	BB	BB	BB	BB	BB	BB	BB	BB	BB	BB	BB	BB
cn_G_T_chr3_203037	3	203037	BOT	[T/G]	BB	BB	BB	BB	BB	BB	BB	BB	BB	BB	BB	BB	BB	BB	BB	BB	BB	BB	BB	BB	BB	BB	BB	BB	BB	BB	BB	BB	BB	BB	BB	BB	BB	BB	BB	BB	BB	BB	BB	BB	BB	BB	BB	BB	BB
chr3_2060971_G_T	3	2060971	BOT	[T/G]	BB	BB	BB	BB	BB	BB	BB	BB	BB	BB	BB	BB	BB	BB	BB	BB	BB	BB	BB	BB	BB	BB	BB	BB	BB	BB	BB	BB	BB	BB	BB	BB	BB	BB	BB	BB	BB	BB	BB	BB	BB	BB	BB	BB	BB
chr3_2069314_C_T	3	2069314	BOT	[T/C]	BB	BB	BB	BB	BB	BB	BB	BB	BB	BB	BB	BB	BB	BB	BB	BB	BB	BB	BB	BB	BB	BB	BB	BB	BB	BB	BB	BB	BB	BB	BB	BB	BB	BB	BB	BB	BB	BB	BB	BB	BB	BB	BB	BB	BB
chr3_2079453_A_G	3	2079453	TOP	[A/G]	AA	AA	AA	AA	AA	AA	AA	AA	AA	AA	AA	AA	AA	AA	AA	AA	AA	AA	AA	AA	AA	AA	AA	AA	AA	AA	AA	AA	AA	AA	AA	AA	AA	AA	AA	AA	AA	AA	AA	AA	AA	AA	AA	AA	AA
chr3_2105620_A_G	3	2105620	BOT	[T/C]	AA	AA	AA	AA	AA	AA	AA	AA	AA	AA	AA	AA	AA	AA	AA	AA	AA	AA	AA	AA	AA	AA	AA	AA	AA	AA	AA	AA	AA	AA	AA	AA	AA	AA	AA	AA	AA	AA	AA	AA	AA	AA	AA	AA	AA
chr3_2113566_A_C	3	2113566	TOP	[A/C]	BB	AB	AB	AB	AB	AB	BB	AB	AB	AB	BB	AB	AB	AB	AB	AB	BB	AA	BB	BB	AB	BB	AB	BB	AA	BB	AB	BB	AB	AB	BB	NC	AB	BB	AB	AB	AB	BB	BB	AB	BB	AA	AA	AB	AA
cn_A_C_chr3_2129166	3	2129166	BOT	[T/G]	AA	AA	AA	AA	AA	AA	AA	AA	AA	AA	AA	AA	AA	AA	AA	AA	AA	AA	AA	AA	AA	AA	AA	AA	AA	AA	AA	AA	AA	AA	AA	AA	AA	AA	AA	AA	AA	AA	AA	AA	AA	AA	AA	AA	AA
be_G_T_chr3_2129384	3	2129384	BOT	[T/G]	BB	BB	BB	BB	BB	BB	BB	BB	BB	BB	BB	BB	BB	BB	BB	BB	BB	BB	BB	BB	BB	BB	BB	BB	BB	BB	BB	BB	BB	BB	BB	BB	BB	BB	BB	BB	BB	BB	BB	BB	BB	BB	BB	BB	BB
chr3_2132458_A_C	3	2132458	BOT	[T/G]	AA	AA	AA	AA	AA	AA	AA	AA	AA	AA	AA	AA	AA	AA	AA	AA	AA	AA	AA	AA	AA	AA	AA	AA	AA	AA	AA	AA	AA	AA	AA	AA	AA	AA	AA	AA	AA	AA	AA	AA	AA	AA	AA	AA	AA
chr3_2159367_A_G	3	2159367	BOT	[T/C]	AA	AB	AB	AB	AB	AB	AA	AB	AB	AB	AA	AB	AB	AB	AB	AB	AA	BB	AA	AA	AB	AA	AB	AA	BB	AA	AB	AA	AB	AB	AA	BB	AB	AA	AB	AB	AB	AA	AA	AB	AA	BB	BB	AB	BB
lb_T_C_chr3_2178228	3	2178228	BOT	[T/C]	AA	AA	AA	AA	AA	AA	AA	AA	AA	AA	AA	AA	AA	AA	AA	AA	AA	AA	AA	AA	AA	AA	AA	AA	AA	AA	AA	AA	AA	AA	AA	AA	AA	AA	AA	AA	AA	AA	AA	AA	AA	AA	AA	AA	AA
ae_G_A_chr3_2196949	3	2196949	BOT	[T/C]	BB	BB	BB	BB	BB	BB	BB	BB	BB	BB	BB	BB	BB	BB	BB	BB	BB	BB	BB	BB	BB	BB	BB	BB	BB	BB	BB	BB	BB	BB	BB	BB	BB	BB	BB	BB	BB	BB	BB	BB	BB	BB	BB	BB	BB
chr3_2214392_A_C	3	2214392	BOT	[T/G]	AA	AB	AB	AB	AB	AB	AA	AB	AB	AB	AA	AB	AB	AB	AB	AB	AA	BB	AA	AA	AB	AA	AB	AA	BB	AA	AB	AA	AB	AB	AA	NC	AB	AA	AB	AB	AB	AA	AA	AB	AA	BB	BB	AB	BB
chr3_2223282_C_T	3	2223282	BOT	[T/C]	BB	BB	BB	BB	BB	BB	BB	BB	BB	BB	BB	BB	BB	BB	BB	BB	BB	BB	BB	BB	BB	BB	BB	BB	BB	BB	BB	BB	BB	BB	BB	BB	BB	BB	BB	BB	BB	BB	BB	BB	BB	BB	BB	BB	BB
chr3_2240244_C_T	3	2240244	TOP	[A/G]	BB	AB	AB	AB	AB	AB	BB	AB	AB	AB	BB	AB	AB	AB	AB	AB	BB	AA	BB	BB	AB	BB	AB	BB	AA	BB	AB	BB	AB	AB	BB	NC	AB	BB	AB	AB	AB	BB	BB	AB	BB	AA	AA	AB	AA
chr3_2248686_C_T	3	2248686	BOT	[T/C]	AA	AA	AA	AA	AA	AA	AA	AA	AA	AA	AA	AA	AA	AA	AA	AA	AA	AA	AA	AA	AA	AA	AA	AA	AA	AA	AA	AA	AA	AA	AA	AA	AA	AA	AA	AA	AA	AA	AA	AA	AA	AA	AA	AA	AA
chr3_2315761_A_C	3	2315761	TOP	[A/C]	BB	BB	BB	BB	BB	BB	BB	BB	BB	BB	BB	BB	BB	BB	BB	BB	BB	BB	BB	BB	BB	BB	BB	BB	BB	BB	BB	BB	BB	BB	BB	BB	BB	BB	BB	BB	BB	BB	BB	BB	BB	BB	BB	BB	BB
chr3_2319611_C_T	3	2319611	BOT	[T/C]	AA	AA	AA	AA	AA	AA	AA	AA	AA	AA	AA	AA	AA	AA	AA	AA	AA	AA	AA	AA	AA	AA	AA	AA	AA	AA	AA	AA	AA	AA	AA	AA	AA	AA	AA	AA	AA	AA	AA	AA	AA	AA	AA	AA	AA
be_C_T_chr3_235494	3	235494	BOT	[T/C]	BB	BB	BB	BB	BB	BB	BB	BB	BB	BB	BB	BB	BB	BB	BB	BB	BB	BB	BB	BB	BB	BB	BB	BB	BB	BB	BB	BB	BB	BB	BB	BB	BB	BB	BB	BB	BB	BB	BB	BB	BB	BB	BB	BB	BB
chr3_2374898_C_T	3	2374898	TOP	[A/G]	AA	AB	AB	AB	AB	AB	AA	AB	AB	AB	AA	AB	AB	AB	AB	AB	AA	BB	AA	AA	AB	AA	AB	AA	BB	AB	AB	AA	AB	AB	AA	NC	AB	AA	AB	AB	AB	AA	AA	AB	AA	BB	BB	AB	BB
chr3_2375279_C_T	3	2375279	BOT	[T/C]	AA	AB	AB	AB	AB	AB	AA	AB	AB	AB	AA	AB	AB	AB	AB	AB	AA	BB	AA	AA	AB	AA	AB	AA	BB	AB	AB	AA	AB	AB	AA	NC	AB	AA	AB	AB	AB	AA	AA	AB	AA	BB	BB	AB	BB
chr3_2391407_C_T	3	2391407	BOT	[T/C]	AA	AA	AA	AA	AA	AA	AA	AA	AA	AA	AA	AA	AA	AA	AA	AA	AA	AA	AA	AA	AA	AA	AA	AA	AA	AA	AA	AA	AA	AA	AA	AA	AA	AA	AA	AA	AA	AA	AA	AA	AA	AA	AA	AA	AA
chr3_2394412_G_T	3	2394412	BOT	[T/G]	BB	AB	AB	AB	AB	AB	BB	AB	AB	AB	BB	AB	AB	AB	AB	AB	BB	AA	BB	BB	AB	BB	AB	BB	AA	AB	AB	BB	AB	AB	BB	AB	AB	BB	AB	AB	AB	BB	BB	AB	BB	AA	AA	AB	AA
lb_C_T_chr3_240775	3	240775	TOP	[A/G]	BB	BB	BB	BB	BB	BB	BB	BB	BB	BB	BB	BB	BB	BB	BB	BB	BB	BB	BB	BB	BB	BB	BB	BB	BB	BB	BB	BB	BB	BB	BB	BB	BB	BB	BB	BB	BB	BB	BB	BB	BB	BB	BB	BB	BB
chr3_2415247_A_G	3	2415247	TOP	[A/G]	BB	AB	AB	AB	AB	AB	BB	AB	AB	AB	BB	AB	AB	AB	AB	AB	BB	AA	BB	BB	AB	BB	AB	BB	AA	AB	AB	BB	AB	AB	BB	NC	AB	BB	AB	AB	AB	BB	BB	AB	BB	AA	AA	AB	AA
chr3_2416033_G_T	3	2416033	TOP	[A/C]	AA	AB	AB	AB	AB	AB	AA	AB	AB	AB	AA	AB	AB	AB	AB	AB	AA	BB	AA	AA	AB	AA	AB	AA	BB	AB	AB	AA	AB	AB	AA	NC	AB	AA	AB	AB	AB	AA	AA	AB	AA	BB	BB	AB	BB
chr3_2471840_C_T	3	2471840	BOT	[T/C]	BB	BB	BB	BB	BB	BB	BB	BB	BB	BB	BB	BB	BB	BB	BB	BB	BB	BB	BB	BB	BB	BB	BB	BB	BB	BB	BB	BB	BB	BB	BB	BB	BB	BB	BB	BB	BB	BB	BB	BB	BB	BB	BB	BB	BB
chr3_24923_C_T	3	24923	BOT	[T/C]	BB	BB	AB	AB	AB	AB	BB	AB	AB	AB	BB	AB	AB	AB	AB	AB	BB	AA	BB	BB	AB	BB	BB	AB	AA	AB	AB	BB	AB	AB	BB	NC	AB	BB	AB	AB	AB	BB	AB	AB	BB	AA	AA	AB	AA
chr3_2500597_A_G	3	2500597	BOT	[T/C]	BB	AB	AB	AB	AB	AB	BB	AB	AB	AB	BB	AB	AB	AB	AB	AB	BB	AA	BB	BB	AB	BB	AB	BB	AA	AB	AB	BB	AB	AB	BB	NC	AB	BB	AB	AB	AB	AB	BB	AB	BB	AA	AA	AB	AA
chr3_2527181_A_G	3	2527181	BOT	[T/C]	BB	BB	BB	BB	BB	BB	BB	BB	BB	BB	BB	BB	BB	BB	BB	BB	BB	BB	BB	BB	BB	BB	BB	BB	BB	BB	BB	BB	BB	BB	BB	BB	BB	BB	BB	BB	BB	BB	BB	BB	BB	BB	BB	BB	BB
chr3_2550388_C_T	3	2550388	BOT	[T/C]	AA	AB	AB	AB	AB	AB	AA	AB	AB	AB	AA	AB	AB	AB	AB	AB	AA	BB	AA	AA	AB	AA	AB	AA	BB	AB	AB	AA	AB	AB	AA	NC	AB	AA	AB	AB	AB	AB	AA	AB	AA	BB	BB	AB	BB
chr3_2570558_A_G	3	2570558	TOP	[A/G]	BB	BB	BB	BB	BB	BB	BB	BB	BB	BB	BB	BB	BB	BB	BB	BB	BB	BB	BB	BB	BB	BB	BB	BB	BB	BB	BB	BB	BB	BB	BB	NC	BB	BB	BB	BB	BB	BB	BB	BB	BB	BB	BB	BB	BB
chr3_2582243_A_G	3	2582243	BOT	[T/C]	BB	BB	BB	BB	BB	BB	BB	BB	BB	BB	BB	BB	BB	BB	BB	BB	BB	BB	BB	BB	BB	BB	BB	BB	BB	BB	BB	BB	BB	BB	BB	BB	BB	BB	BB	BB	BB	BB	BB	BB	BB	BB	BB	BB	BB
cn_G_T_chr3_2588133	3	2588133	BOT	[T/G]	BB	BB	BB	BB	BB	BB	BB	BB	BB	BB	BB	BB	BB	BB	BB	BB	BB	BB	BB	BB	BB	BB	BB	BB	BB	BB	BB	BB	BB	BB	BB	BB	BB	BB	BB	BB	BB	BB	BB	BB	BB	BB	BB	BB	BB
chr3_2607749_A_G	3	2607749	TOP	[A/G]	AA	AB	AB	AB	AB	AB	AA	AB	AB	AB	AA	AB	AB	AB	AB	AB	AA	BB	AA	AA	AB	AA	AB	AA	BB	AB	AB	AA	AB	AB	AA	NC	AB	AB	AB	AB	AB	AB	AA	AB	AA	BB	BB	AB	BB
chr3_2620261_A_G	3	2620261	TOP	[A/G]	BB	AB	AB	AB	AB	AB	BB	AB	AB	AB	BB	AB	AB	AB	AB	AB	BB	AA	BB	BB	AB	BB	AB	BB	AA	AB	AB	BB	AB	AB	BB	NC	AB	AB	AB	AB	AB	AB	BB	AB	BB	AA	AA	AB	AA
chr3_2634543_C_T	3	2634543	BOT	[T/C]	AA	AA	AA	AA	AA	AA	AA	AA	AA	AA	AA	AA	AA	AA	AA	AA	AA	AA	AA	AA	AA	AA	AA	AA	AA	AA	AA	AA	AA	AA	AA	AA	AA	AA	AA	AA	AA	AA	AA	AA	AA	AA	AA	AA	AA
ae_A_G_chr3_2648300	3	2648300	TOP	[A/G]	AA	AA	AA	AA	AA	AA	AA	AA	AA	AA	AA	AA	AA	AA	AA	AA	AA	AA	AA	AA	AA	AA	AA	AA	AA	AA	AA	AA	AA	AA	AA	AA	AA	AA	AA	AA	AA	AA	AA	AA	AA	AA	AA	AA	AA
lb_G_A_chr3_2658023	3	2658023	TOP	[A/G]	BB	BB	BB	BB	BB	BB	BB	BB	BB	BB	BB	BB	BB	BB	BB	BB	BB	BB	BB	BB	BB	BB	BB	BB	BB	BB	BB	BB	BB	BB	BB	BB	BB	BB	BB	BB	BB	BB	BB	BB	BB	BB	BB	BB	BB
chr3_2661131_C_T	3	2661131	BOT	[T/C]	BB	BB	BB	BB	BB	BB	BB	BB	BB	BB	BB	BB	BB	BB	BB	BB	BB	BB	BB	BB	BB	BB	BB	BB	BB	BB	BB	BB	BB	BB	BB	BB	BB	BB	BB	BB	BB	BB	BB	BB	BB	BB	BB	BB	BB
chr3_2671605_C_T	3	2671605	BOT	[T/C]	BB	AB	AB	AB	AB	AB	BB	AB	AB	AB	BB	AB	AB	AB	AB	AB	BB	AA	BB	BB	AB	BB	AB	BB	AA	AB	AB	BB	AB	AB	BB	NC	AB	AB	AB	AB	AB	AB	BB	AB	BB	AA	AA	AB	AA
chr3_2687664_A_C	3	2687664	BOT	[T/G]	AA	AB	AB	AB	AB	AB	AA	AB	AB	AB	AA	AB	AB	AB	AB	AB	AA	BB	AA	AA	AB	AA	AB	AA	BB	AB	AB	AA	AB	AB	AA	BB	AB	AB	AB	AB	AB	AB	AA	AB	AA	BB	BB	AB	BB
chr3_2715818_A_G	3	2715818	TOP	[A/G]	BB	BB	BB	BB	BB	BB	BB	BB	BB	BB	BB	BB	BB	BB	BB	BB	BB	BB	BB	BB	BB	BB	BB	BB	BB	BB	BB	BB	BB	BB	BB	BB	BB	BB	BB	BB	BB	BB	BB	BB	BB	BB	BB	BB	BB
chr3_2725982_C_T	3	2725982	TOP	[A/G]	AA	AB	AB	AB	AB	AB	AA	AB	AB	AB	AA	AB	AB	AB	AB	AB	AA	BB	AA	AA	AB	AA	AB	AA	BB	AB	AB	AA	AB	AB	AA	NC	AB	AB	AB	AB	AB	AB	AA	AB	AA	BB	BB	AB	BB
chr3_2765691_C_T	3	2765691	BOT	[T/C]	AA	AA	AA	AA	AA	AA	AA	AA	AA	AA	AA	AA	AA	AA	AA	AA	AA	AA	AA	AA	AA	AA	AA	AA	AA	AA	AA	AA	AA	AA	AA	NC	AA	AA	AA	AA	AA	AA	AA	AA	AA	AA	AA	AA	AA
chr3_2771077_A_C	3	2771077	BOT	[T/G]	BB	AB	AB	AB	AB	AB	BB	AB	AB	AB	BB	AB	AB	AB	AB	AB	BB	AA	BB	BB	AB	BB	AB	BB	AA	AB	AB	BB	AB	AB	BB	NC	AB	AB	AB	AB	AB	AB	BB	AB	BB	AA	AA	AB	AA
chr3_277845_C_T	3	277845	BOT	[T/C]	BB	BB	BB	BB	BB	BB	BB	BB	BB	BB	BB	BB	BB	BB	BB	BB	BB	BB	BB	BB	BB	BB	BB	BB	BB	BB	BB	BB	BB	BB	BB	NC	BB	BB	BB	BB	BB	BB	BB	BB	BB	BB	BB	BB	BB
chr3_2814479_A_G	3	2814479	BOT	[T/C]	AA	AB	AB	AB	AB	AB	AA	AB	AB	AB	AA	AB	AB	AB	AB	AB	AA	BB	AA	AA	AB	AA	AB	AA	BB	AB	AB	AA	AB	AB	AA	BB	AB	AB	AB	AB	AB	AB	AA	AB	AA	BB	BB	AB	BB
chr3_2823198_A_C	3	2823198	TOP	[A/C]	AA	AB	AB	AB	AB	AB	AA	AB	AB	AB	AA	AB	AB	AB	AB	AB	AA	BB	AA	AA	AB	AA	AB	AA	BB	AB	AB	AA	AB	AB	AA	NC	AB	AB	AB	AB	AB	AB	AA	AB	AA	BB	BB	AB	BB
chr3_2865739_C_T	3	2865739	BOT	[T/C]	BB	AA	AB	AB	AB	AB	BB	AB	AB	AB	BB	AB	AB	AB	AB	AB	BB	AA	BB	BB	AB	BB	AB	BB	AA	AB	AB	BB	AB	AB	BB	NC	AB	AB	AB	AB	AB	AB	BB	AB	BB	AA	AA	AB	AA
chr3_2876741_C_T	3	2876741	BOT	[T/C]	BB	AA	AB	AB	AB	AB	BB	AB	AB	AB	BB	AB	AB	AB	AB	AB	BB	AA	BB	BB	AB	BB	AB	BB	AA	AB	AB	BB	AB	AB	BB	NC	AB	AB	AB	AB	AB	AB	BB	AB	BB	AA	AA	AB	AA
mu_o_G_T_chr3_2886940	3	2886940	BOT	[T/G]	BB	BB	BB	BB	BB	BB	BB	BB	BB	BB	BB	BB	BB	BB	BB	BB	BB	BB	BB	BB	BB	BB	BB	BB	BB	BB	BB	BB	BB	BB	BB	BB	BB	BB	BB	BB	BB	BB	BB	BB	BB	BB	BB	BB	BB
chr3_2897518_C_T	3	2897518	BOT	[T/C]	AA	BB	AB	AB	AB	AB	AA	AB	AB	AB	AA	AB	AB	AB	AB	AB	AA	BB	AA	AA	AB	AA	AB	AA	BB	AB	AB	AA	AB	AB	AA	NC	AB	AB	AB	AB	AB	AB	AA	AB	AA	BB	AB	AB	BB
mu_o_A_G_chr3_2906762	3	2906762	TOP	[A/G]	AA	AA	AA	AA	AA	AA	AA	AA	AA	AA	AA	AA	AA	AA	AA	AA	AA	AA	AA	AA	AA	AA	AA	AA	AA	AA	AA	AA	AA	AA	AA	AA	AA	AA	AA	AA	AA	AA	AA	AA	AA	AA	AA	AA	AA
chr3_2920716_A_G	3	2920716	TOP	[A/G]	AA	AA	AA	AA	AA	AA	AA	AA	AA	AA	AA	AA	AA	AA	AA	AA	AA	AA	AA	AA	AA	AA	AA	AA	AA	AA	AA	AA	AA	AA	AA	AA	AA	AA	AA	AA	AA	AA	AA	AA	AA	AA	AA	AA	AA
chr3_2925093_A_C	3	2925093	TOP	[A/C]	AA	AA	AA	AA	AA	AA	AA	AA	AA	AA	AA	AA	AA	AA	AA	AA	AA	AA	AA	AA	AA	AA	AA	AA	AA	AA	AA	AA	AA	AA	AA	AA	AA	AA	AA	AA	AA	AA	AA	AA	AA	AA	AA	AA	AA
chr3_2949498_C_T	3	2949498	TOP	[A/G]	AA	AA	AA	AA	AA	AA	AA	AA	AA	AA	AA	AA	AA	AA	AA	AA	AA	AA	AA	AA	AA	AA	AA	AA	AA	AA	AA	AA	AA	AA	AA	AA	AA	AA	AA	AA	AA	AA	AA	AA	AA	AA	AA	AA	AA
chr3_2974591_A_G	3	2974591	TOP	[A/G]	AA	AA	AA	AA	AA	AA	AA	AA	AA	AA	AA	AA	AA	AA	AA	AA	AA	AA	AA	AA	AA	AA	AA	AA	AA	AA	AA	AA	AA	AA	AA	AA	AA	AA	AA	AA	AA	AA	AA	AA	AA	AA	AA	AA	AA
chr3_2977354_A_G	3	2977354	TOP	[A/G]	AA	BB	AB	AB	AB	AB	AA	AB	AB	AB	AA	AB	AB	AB	AB	AB	AA	BB	AA	AA	AB	AA	AB	AA	BB	AB	AB	AA	AB	AB	AA	NC	AB	AB	AB	AB	AB	AB	AA	AB	AA	BB	AB	AB	BB
chr3_3005112_A_G	3	3005112	BOT	[T/C]	BB	BB	BB	BB	BB	BB	BB	BB	BB	BB	BB	BB	BB	BB	BB	BB	BB	BB	BB	BB	BB	BB	BB	BB	BB	BB	BB	BB	BB	BB	BB	BB	BB	BB	BB	BB	BB	BB	BB	BB	BB	BB	BB	BB	BB
chr3_3006386_A_G	3	3006386	BOT	[T/C]	BB	BB	BB	BB	BB	BB	BB	BB	BB	BB	BB	BB	BB	BB	BB	BB	BB	BB	BB	BB	BB	BB	BB	BB	BB	BB	BB	BB	BB	BB	BB	BB	BB	BB	BB	BB	BB	BB	BB	BB	BB	BB	BB	BB	BB
chr3_3020528_C_T	3	3020528	BOT	[T/C]	BB	AA	AB	AB	AB	AB	BB	AB	AB	AB	BB	AB	AB	AB	AB	AB	BB	AA	BB	BB	AB	BB	AB	BB	AA	AB	AB	BB	AB	AB	BB	NC	AB	AB	AB	AB	AB	AB	BB	AB	BB	AA	AB	AB	AA
chr3_3030621_C_T	3	3030621	BOT	[T/C]	BB	BB	BB	BB	BB	BB	BB	BB	BB	BB	BB	BB	BB	BB	BB	BB	BB	BB	BB	BB	BB	BB	BB	BB	BB	BB	BB	BB	BB	BB	BB	BB	BB	BB	BB	BB	BB	BB	BB	BB	BB	BB	BB	BB	BB
chr3_3052034_A_G	3	3052034	BOT	[T/C]	NC	BB	AB	AB	AB	AB	AA	AB	AB	AB	AA	AB	AB	AB	AB	AB	AA	BB	AA	AA	AB	AA	AB	AA	BB	AB	AB	AA	AB	AB	AA	NC	AB	AB	AB	AB	AB	AB	AA	AB	AA	BB	AB	AB	BB
chr3_3070543_A_G	3	3070543	BOT	[T/C]	BB	AA	AB	AB	AB	AB	BB	AB	AB	AB	BB	AB	AB	AB	AB	AB	BB	AA	BB	BB	AB	BB	AB	BB	AA	AB	AB	BB	AB	AB	BB	NC	AB	AB	AB	AB	AB	AB	BB	AB	BB	AA	AB	AB	AA
cn_A_C_chr3_3078651	3	3078651	TOP	[A/C]	AA	AA	AA	AA	AA	AA	AA	AA	AA	AA	AA	AA	AA	AA	AA	AA	AA	AA	AA	AA	AA	AA	AA	AA	AA	AA	AA	AA	AA	AA	AA	AA	AA	AA	AA	AA	AA	AA	AA	AA	AA	AA	AA	AA	AA
chr3_3083557_A_G	3	3083557	BOT	[T/C]	BB	AA	AB	AB	AB	AB	BB	AB	AB	AB	BB	AB	AB	AB	AB	AB	BB	AA	BB	BB	AB	BB	AB	BB	AA	AB	AB	BB	AB	AB	BB	AA	AB	AB	AB	AB	AB	AB	BB	AB	BB	AA	AB	AB	AA
chr3_3109307_C_T	3	3109307	TOP	[A/G]	BB	AA	AB	AB	AB	AB	BB	AB	AB	AB	BB	AB	AB	AB	AB	AB	BB	AA	BB	BB	BB	BB	AB	BB	AA	AB	AB	BB	AB	AB	BB	NC	AB	AB	AB	AB	AB	AB	BB	AB	BB	AA	AB	AB	AA
be_T_C_chr3_3110337	3	3110337	BOT	[T/C]	AA	AA	AA	AA	AA	AA	AA	AA	AA	AA	AA	AA	AA	AA	AA	AA	AA	AA	AA	AA	AA	AA	AA	AA	AA	AA	AA	AA	AA	AA	AA	AA	AA	AA	AA	AA	AA	AA	AA	AA	AA	AA	AA	AA	AA
chr3_311463_G_T	3	311463	TOP	[A/C]	AA	AA	AA	AA	AA	AA	AA	AA	AA	AA	AA	AA	AA	AA	AA	AA	AA	AA	AA	AA	AA	AA	AA	AA	AA	AA	AA	AA	AA	AA	AA	AA	AA	AA	AA	AA	AA	AA	AA	AA	AA	AA	AA	AA	AA
chr3_3144062_G_T	3	3144062	BOT	[T/G]	AA	AA	AA	AA	AA	AA	AA	AA	AA	AA	AA	AA	AA	AA	AA	AA	AA	AA	AA	AA	AA	AA	AA	AA	AA	AA	AA	AA	AA	AA	AA	NC	AA	AA	AA	AA	AA	AA	AA	AA	AA	AA	AA	AA	AA
lb_C_T_chr3_3150734	3	3150734	BOT	[T/C]	AA	AA	AA	AA	AA	AA	AA	AA	AA	AA	AA	AA	AA	AA	AA	AA	AA	AA	AA	AA	AA	AA	AA	AA	AA	AA	AA	AA	AA	AA	AA	AA	AA	AA	AA	AA	AA	AA	AA	AA	AA	AA	AA	AA	AA
chr3_3162239_C_T	3	3162239	TOP	[A/G]	BB	AA	AB	AB	AB	AB	BB	AB	AB	AB	BB	AB	AB	AB	AB	AB	BB	AA	BB	BB	BB	BB	AB	BB	AA	AB	AB	BB	AB	AB	BB	NC	AB	AB	AB	AB	AB	AB	BB	AB	BB	AA	AB	AB	AA
chr3_3191016_A_G	3	3191016	BOT	[T/C]	BB	AA	AB	AB	AB	AB	BB	AB	AB	AB	BB	AB	AB	AB	AB	AB	BB	AA	BB	BB	BB	BB	AB	BB	AA	AB	AB	BB	AB	AB	BB	NC	AB	AB	AB	AB	AB	AB	BB	AB	BB	AA	AB	AB	AA
chr3_3220444_C_T	3	3220444	BOT	[T/C]	AA	AA	AA	AA	AA	AA	AA	AA	AA	AA	AA	AA	AA	AA	AA	AA	AA	AA	AA	AA	AA	AA	AA	AA	AA	AA	AA	AA	AA	AA	AA	AA	AA	AA	AA	AA	AA	AA	AA	AA	AA	AA	AA	AA	AA
li_T_G_chr3_3223595	3	3223595	TOP	[A/C]	AA	AA	AA	AA	AA	AA	AA	AA	AA	AA	AA	AA	AA	AA	AA	AA	AA	AA	AA	AA	AA	AA	AA	AA	AA	AA	AA	AA	AA	AA	AA	AA	AA	AA	AA	AA	AA	AA	AA	AA	AA	AA	AA	AA	AA
chr3_3243826_A_G	3	3243826	TOP	[A/G]	BB	BB	BB	BB	BB	BB	BB	BB	BB	BB	BB	BB	BB	BB	BB	BB	BB	BB	BB	BB	BB	BB	BB	BB	BB	BB	BB	BB	BB	BB	BB	BB	BB	BB	BB	BB	BB	BB	BB	BB	BB	BB	BB	BB	BB
chr3_3268056_A_G	3	3268056	TOP	[A/G]	AA	AA	AA	AA	AA	AA	AA	AA	AA	AA	AA	AA	AA	AA	AA	AA	AA	AA	AA	AA	AA	AA	AA	AA	AA	AA	AA	AA	AA	AA	AA	AA	AA	AA	AA	AA	AA	AA	AA	AA	AA	AA	AA	AA	AA
chr3_3269668_A_G	3	3269668	TOP	[A/G]	BB	AA	AB	AB	AB	AB	BB	AB	AB	AB	BB	AB	AB	AB	AB	AB	BB	AA	BB	BB	BB	BB	AB	BB	AA	AB	AB	BB	AB	AB	BB	NC	AB	AB	AB	AB	AB	AB	BB	AB	BB	AA	AB	AB	AA
chr3_3334282_C_T	3	3334282	BOT	[T/C]	AA	AA	AA	AA	AA	AA	AA	AA	AA	AA	AA	AA	AA	AA	AA	AA	AA	AA	AA	AA	AA	AA	AA	AA	AA	AA	AA	AA	AA	AA	AA	AA	AA	AA	AA	AA	AA	AA	AA	AA	AA	AA	AA	AA	AA
chr3_3365960_A_G	3	3365960	BOT	[T/C]	AA	AA	AA	AA	AA	AA	AA	AA	AA	AA	AA	AA	AA	AA	AA	AA	AA	AA	AA	AA	AA	AA	AA	AA	AA	AA	AA	AA	AA	AA	AA	AA	AA	AA	AA	AA	AA	AA	AA	AA	AA	AA	AA	AA	AA
chr3_3366191_A_G	3	3366191	BOT	[T/C]	BB	BB	BB	BB	BB	BB	BB	BB	BB	BB	BB	BB	BB	BB	BB	BB	BB	BB	BB	BB	BB	BB	BB	BB	BB	BB	BB	BB	BB	BB	BB	BB	BB	BB	BB	BB	BB	BB	BB	BB	BB	BB	BB	BB	BB
chr3_3400592_A_G	3	3400592	TOP	[A/G]	BB	BB	BB	BB	BB	BB	BB	BB	BB	BB	BB	BB	BB	BB	BB	BB	BB	BB	BB	BB	BB	BB	BB	BB	BB	BB	BB	BB	BB	BB	BB	BB	BB	BB	BB	BB	BB	BB	BB	BB	BB	BB	BB	BB	BB
mu_s_T_G_chr3_3423955	3	3423955	BOT	[T/G]	AA	AA	AA	AA	AA	AA	AA	AA	AA	AA	AA	AA	AA	AA	AA	AA	AA	AA	AA	AA	AA	AA	AA	AA	AA	AA	AA	AA	AA	AA	AA	AA	AA	AA	AA	AA	AA	AA	AA	AA	AA	AA	AA	AA	AA
chr3_3425695_A_C	3	3425695	TOP	[A/C]	AA	BB	AB	AB	AB	AB	AA	AB	AB	AB	AA	AB	AB	AB	AB	AB	AA	BB	AA	AA	AA	AA	AB	AA	BB	AB	AB	AA	AB	AB	AA	NC	AB	AB	AB	AB	AB	AB	AA	AB	AA	BB	AB	AB	BB
chr3_3428350_A_G	3	3428350	BOT	[T/C]	AA	AA	AA	AA	AA	AA	AA	AA	AA	AA	AA	AA	AA	AA	AA	AA	AA	AA	AA	AA	AA	AA	AA	AA	AA	AA	AA	AA	AA	AA	AA	AA	AA	AA	AA	AA	AA	AA	AA	AA	AA	AA	AA	AA	AA
chr3_3460123_A_G	3	3460123	TOP	[A/G]	AA	BB	AB	AB	AB	AB	AA	AB	AB	AB	AA	AB	AB	AB	AB	AB	AA	BB	AA	AA	AA	AA	AB	AA	BB	AB	AB	AA	AB	AB	AA	BB	AB	AB	AB	AB	AB	AB	AA	AB	AA	BB	AB	AB	BB
chr3_3469758_A_G	3	3469758	TOP	[A/G]	AA	BB	AB	AB	AB	AB	AA	AB	AB	AB	AA	AB	AB	AB	AB	AB	AA	BB	AA	AA	AA	AA	AB	AA	BB	AB	AB	AA	AB	AB	AA	NC	AB	AB	AB	AB	AB	AB	AA	AB	AA	BB	AB	AB	BB
chr3_3479237_A_C	3	3479237	TOP	[A/C]	BB	AA	AB	AB	AB	AB	BB	AB	AB	AB	BB	AB	AB	AB	AB	AB	BB	AA	BB	BB	BB	BB	AB	BB	AA	AB	AB	BB	AB	AB	BB	NC	AB	AB	AB	AB	AB	AB	BB	AB	BB	AA	AB	AB	AA
chr3_3500588_A_G	3	3500588	TOP	[A/G]	BB	BB	BB	BB	BB	BB	BB	BB	BB	BB	BB	BB	BB	BB	BB	BB	BB	BB	BB	BB	BB	BB	BB	BB	BB	BB	BB	BB	BB	BB	BB	BB	BB	BB	BB	BB	BB	BB	BB	BB	BB	BB	BB	BB	BB
chr3_3532524_C_T	3	3532524	TOP	[A/G]	AA	AA	AA	AA	AA	AA	AA	AA	AA	AA	AA	AA	AA	AA	AA	AA	AA	AA	AA	AA	AA	AA	AA	AA	AA	AA	AA	AA	AA	AA	AA	AA	AA	AA	AA	AA	AA	AA	AA	AA	AA	AA	AA	AA	AA
chr3_354781_A_C	3	354781	TOP	[A/C]	BB	BB	BB	BB	BB	BB	BB	BB	BB	BB	BB	BB	BB	BB	BB	BB	BB	BB	BB	BB	BB	BB	BB	BB	BB	BB	BB	BB	BB	BB	BB	BB	BB	BB	BB	BB	BB	BB	BB	BB	BB	BB	BB	BB	BB
be_G_T_chr3_3594457	3	3594457	BOT	[T/G]	BB	BB	BB	BB	BB	BB	BB	BB	BB	BB	BB	BB	BB	BB	BB	BB	BB	BB	BB	BB	BB	BB	BB	BB	BB	BB	BB	BB	BB	BB	BB	BB	BB	BB	BB	BB	BB	BB	BB	BB	BB	BB	BB	BB	BB
chr3_3614685_C_T	3	3614685	BOT	[T/C]	AA	AA	AA	AA	AA	AA	AA	AA	AA	AA	AA	AA	AA	AA	AA	AA	AA	AA	AA	AA	AA	AA	AA	AA	AA	AA	AA	AA	AA	AA	AA	AA	AA	AA	AA	AA	AA	AA	AA	AA	AA	AA	AA	AA	AA
chr3_3618780_A_C	3	3618780	BOT	[T/G]	AA	AA	AA	AA	AA	AA	AA	AA	AA	AA	AA	AA	AA	AA	AA	AA	AA	AA	AA	AA	AA	AA	AA	AA	AA	AA	AA	AA	AA	AA	AA	AA	AA	AA	AA	AA	AA	AA	AA	AA	AA	AA	AA	AA	AA
lb_T_C_chr3_3622164	3	3622164	BOT	[T/C]	AA	AA	AA	AA	AA	AA	AA	AA	AA	AA	AA	AA	AA	AA	AA	AA	AA	AA	AA	AA	AA	AA	AA	AA	AA	AA	AA	AA	AA	AA	AA	AA	AA	AA	AA	AA	AA	AA	AA	AA	AA	AA	AA	AA	AA
ae_G_A_chr3_3630309	3	3630309	BOT	[T/C]	BB	BB	BB	BB	BB	BB	BB	BB	BB	BB	BB	BB	BB	BB	BB	BB	BB	BB	BB	BB	BB	BB	BB	BB	BB	BB	BB	BB	BB	BB	BB	BB	BB	BB	BB	BB	BB	BB	BB	BB	BB	BB	BB	BB	BB
chr3_3631393_C_T	3	3631393	BOT	[T/C]	BB	BB	BB	BB	BB	BB	BB	BB	BB	BB	BB	BB	BB	BB	BB	BB	BB	BB	BB	BB	BB	BB	BB	BB	BB	BB	BB	BB	BB	BB	BB	BB	BB	BB	BB	BB	BB	BB	BB	BB	BB	BB	BB	BB	BB
chr3_3639855_C_T	3	3639855	BOT	[T/C]	BB	AA	AB	AB	AB	AA	BB	AB	AA	AB	BB	AB	AB	AB	AB	AB	BB	AA	BB	BB	AB	BB	AB	AB	AA	AB	AA	BB	AB	AB	AB	AB	AA	AB	AB	AB	AB	AB	BB	AA	BB	AB	AB	AB	AA
chr3_3665847_C_T	3	3665847	BOT	[T/C]	AA	BB	AB	AB	AB	BB	AA	AB	BB	AB	AA	AB	AB	AB	AB	AB	AA	BB	AA	AA	AB	AA	AB	AB	BB	AB	BB	AA	AB	AB	AB	AB	BB	AB	AB	AB	AB	AB	AA	BB	AA	AB	AB	AB	BB
chr3_3666831_A_G	3	3666831	BOT	[T/C]	AA	AA	AA	AA	AA	AA	AA	AA	AA	AA	AA	AA	AA	AA	AA	AA	AA	AA	AA	AA	AA	AA	AA	AA	AA	AA	AA	AA	AA	AA	AA	NC	AA	AA	AA	AA	AA	AA	AA	AA	AA	AA	AA	AA	AA
chr3_3770709_C_T	3	3770709	BOT	[T/C]	BB	BB	BB	BB	BB	BB	BB	BB	BB	BB	BB	BB	BB	BB	BB	BB	BB	BB	BB	BB	BB	BB	BB	BB	BB	BB	BB	BB	BB	BB	BB	BB	BB	BB	BB	BB	BB	BB	BB	BB	BB	BB	BB	BB	BB
chr3_3798186_C_T	3	3798186	BOT	[T/C]	AA	AA	AA	AA	AA	AA	AA	AA	AA	AA	AA	AA	AA	AA	AA	AA	AA	AA	AA	AA	AA	AA	AA	AA	AA	AA	AA	AA	AA	AA	AA	AA	AA	AA	AA	AA	AA	AA	AA	AA	AA	AA	AA	AA	AA
chr3_3824312_C_T	3	3824312	BOT	[T/C]	BB	BB	BB	BB	BB	BB	BB	BB	BB	BB	BB	BB	BB	BB	BB	BB	BB	BB	BB	BB	BB	BB	BB	BB	BB	BB	BB	BB	BB	BB	BB	NC	BB	BB	BB	BB	BB	BB	BB	BB	BB	BB	BB	BB	BB
chr3_3855262_A_G	3	3855262	BOT	[T/C]	NC	BB	AB	AB	AB	BB	AA	AB	BB	AB	AA	AB	AB	AB	AB	AB	AA	BB	AA	AA	AB	AA	AB	AB	BB	AB	BB	AA	AB	AB	AB	NC	BB	AB	AB	AB	AB	AB	AA	BB	AA	AB	AB	AB	BB
chr3_3869027_A_G	3	3869027	BOT	[T/C]	AA	AA	AA	AA	AA	AA	AA	AA	AA	AA	AA	AA	AA	AA	AA	AA	AA	AA	AA	AA	AA	AA	AA	AA	AA	AA	AA	AA	AA	AA	AA	AA	AA	AA	AA	AA	AA	AA	AA	AA	AA	AA	AA	AA	AA
chr3_3877259_A_G	3	3877259	BOT	[T/C]	BB	BB	BB	BB	BB	BB	BB	BB	BB	BB	BB	BB	BB	BB	BB	BB	BB	BB	BB	BB	BB	BB	BB	BB	BB	BB	BB	BB	BB	BB	BB	BB	BB	BB	BB	BB	BB	BB	BB	BB	BB	BB	BB	BB	BB
chr3_3903384_C_T	3	3903384	BOT	[T/C]	BB	BB	BB	BB	BB	BB	BB	BB	BB	BB	BB	BB	BB	BB	BB	BB	BB	BB	BB	BB	BB	BB	BB	BB	BB	BB	BB	BB	BB	BB	BB	NC	BB	BB	BB	BB	BB	BB	BB	BB	BB	BB	BB	BB	BB
chr3_3918094_A_G	3	3918094	BOT	[T/C]	BB	BB	BB	BB	BB	BB	BB	BB	BB	BB	BB	BB	BB	BB	BB	BB	BB	BB	BB	BB	BB	BB	BB	BB	BB	BB	BB	BB	BB	BB	BB	NC	BB	BB	BB	BB	BB	BB	BB	BB	BB	BB	BB	BB	BB
chr3_3948287_C_T	3	3948287	BOT	[T/C]	AA	AA	AA	AA	AA	AA	AA	AA	AA	AA	AA	AA	AA	AA	AA	AA	AA	AA	AA	AA	AA	AA	AA	AA	AA	AA	AA	AA	AA	AA	AA	AA	AA	AA	AA	AA	AA	AA	AA	AA	AA	AA	AA	AA	AA
chr3_3967815_A_G	3	3967815	TOP	[A/G]	BB	BB	BB	BB	BB	BB	BB	BB	BB	BB	BB	BB	BB	BB	BB	BB	BB	BB	BB	BB	BB	BB	BB	BB	BB	BB	BB	BB	BB	BB	BB	BB	BB	BB	BB	BB	BB	BB	BB	BB	BB	BB	BB	BB	BB
chr3_4019328_C_T	3	4019328	BOT	[T/C]	AA	BB	AB	AB	AB	BB	AA	AB	BB	AB	AA	AB	AB	AB	AB	AB	AA	BB	AA	AA	AB	AA	AB	AB	BB	AB	BB	AA	AB	AB	AB	NC	BB	AB	AB	AB	AB	AB	AA	BB	AA	AB	AB	AB	BB
cn_A_G_chr3_4032278	3	4032278	BOT	[T/C]	AA	AA	AA	AA	AA	AA	AA	AA	AA	AA	AA	AA	AA	AA	AA	AA	AA	AA	AA	AA	AA	AA	AA	AA	AA	AA	AA	AA	AA	AA	AA	AA	AA	AA	AA	AA	AA	AA	AA	AA	AA	AA	AA	AA	AA
chr3_4036840_C_T	3	4036840	BOT	[T/C]	AA	AA	AA	AA	AA	AA	AA	AA	AA	AA	AA	AA	AA	AA	AA	AA	AA	AA	AA	AA	AA	AA	AA	AA	AA	AA	AA	AA	AA	AA	AA	AA	AA	AA	AA	AA	AA	AA	AA	AA	AA	AA	AA	AA	AA
chr3_4062013_C_T	3	4062013	TOP	[A/G]	BB	BB	BB	BB	BB	BB	BB	BB	BB	BB	BB	BB	BB	BB	BB	BB	BB	BB	BB	BB	BB	BB	BB	BB	BB	BB	BB	BB	BB	BB	BB	BB	BB	BB	BB	BB	BB	BB	BB	BB	BB	BB	BB	BB	BB
chr3_4089074_A_G	3	4089074	BOT	[T/C]	BB	BB	BB	BB	BB	BB	BB	BB	BB	BB	BB	BB	BB	BB	BB	BB	BB	BB	BB	BB	BB	BB	BB	BB	BB	BB	BB	BB	BB	BB	BB	BB	BB	BB	BB	BB	BB	BB	BB	BB	BB	BB	BB	BB	BB
be_A_G_chr3_4091322	3	4091322	BOT	[T/C]	AA	AA	AA	AA	AA	AA	AA	AA	AA	AA	AA	AA	AA	AA	AA	AA	AA	AA	AA	AA	AA	AA	AA	AA	AA	AA	AA	AA	AA	AA	AA	AA	AA	AA	AA	AA	AA	AA	AA	AA	AA	AA	AA	AA	AA
ae_G_A_chr3_4091914	3	4091914	BOT	[T/C]	BB	BB	BB	BB	BB	BB	BB	BB	BB	BB	BB	BB	BB	BB	BB	BB	BB	BB	BB	BB	BB	BB	BB	BB	BB	BB	BB	BB	BB	BB	BB	BB	BB	BB	BB	BB	BB	BB	BB	BB	BB	BB	BB	BB	BB
lb_T_C_chr3_4104515	3	4104515	BOT	[T/C]	AA	BB	AB	AB	AB	BB	AA	AB	AB	AB	AA	AB	AB	AB	AB	AB	AA	BB	AA	AA	AB	AA	AB	AB	BB	AB	BB	AA	AB	AB	AB	NC	BB	AB	AB	AB	AB	AB	AA	BB	AA	AB	AB	AB	BB
chr3_4118227_A_C	3	4118227	TOP	[A/C]	BB	AA	AB	AB	AB	AA	BB	AB	AB	AB	BB	AB	AB	AB	AB	AB	BB	AA	BB	BB	AB	BB	AB	AB	AA	AB	AA	BB	AB	AB	AB	AA	AA	AB	AB	AB	AB	AB	BB	AA	BB	AB	AB	AB	AA
chr3_4141326_G_T	3	4141326	TOP	[A/C]	BB	BB	BB	BB	BB	BB	BB	BB	BB	BB	BB	BB	BB	BB	BB	BB	BB	BB	BB	BB	BB	BB	BB	BB	BB	BB	BB	BB	BB	BB	BB	NC	BB	BB	BB	BB	BB	BB	BB	BB	BB	BB	BB	BB	BB
chr3_4166954_C_T	3	4166954	TOP	[A/G]	BB	BB	BB	BB	BB	BB	BB	BB	BB	BB	BB	BB	BB	BB	BB	BB	BB	BB	BB	BB	BB	BB	BB	BB	BB	BB	BB	BB	BB	BB	BB	BB	BB	BB	BB	BB	BB	BB	BB	BB	BB	BB	BB	BB	BB
chr3_4173854_C_T	3	4173854	BOT	[T/C]	BB	BB	BB	BB	BB	BB	BB	BB	BB	BB	BB	BB	BB	BB	BB	BB	BB	BB	BB	BB	BB	BB	BB	BB	BB	BB	BB	BB	BB	BB	BB	BB	BB	BB	BB	BB	BB	BB	BB	BB	BB	BB	BB	BB	BB
chr3_4196090_A_C	3	4196090	TOP	[A/C]	AA	AA	AA	AA	AA	AA	AA	AA	AA	AA	AA	AA	AA	AA	AA	AA	AA	AA	AA	AA	AA	AA	AA	AA	AA	AA	AA	AA	AA	AA	AA	NC	AA	AA	AA	AA	AA	AA	AA	AA	AA	AA	AA	AA	AA
chr3_4218968_C_T	3	4218968	BOT	[T/C]	BB	BB	BB	BB	BB	BB	BB	BB	BB	BB	BB	BB	BB	BB	BB	BB	BB	BB	BB	BB	BB	BB	BB	BB	BB	BB	BB	BB	BB	BB	BB	BB	BB	BB	BB	BB	BB	BB	BB	BB	BB	BB	BB	BB	BB
chr3_4221419_G_T	3	4221419	TOP	[A/C]	AA	AA	AA	AA	AA	AA	AA	AA	AA	AA	AA	AA	AA	AA	AA	AA	AA	AA	AA	AA	AA	AA	AA	AA	AA	AA	AA	AA	AA	AA	AA	AA	AA	AA	AA	AA	AA	AA	AA	AA	AA	AA	AA	AA	AA
chr3_424268_A_C	3	424268	BOT	[T/G]	AA	AA	AB	AB	AB	AB	AA	AB	AB	AB	AA	AB	AB	AB	AB	AB	AA	BB	AA	AA	AB	AA	AA	AB	BB	AB	AB	AA	AB	AB	AA	NC	AB	AA	AB	AB	AB	AA	AA	AB	AA	BB	BB	AB	BB
chr3_4301377_A_G	3	4301377	TOP	[A/G]	AA	AA	AA	AA	AA	AA	AA	AA	AA	AA	AA	AA	AA	AA	AA	AA	AA	AA	AA	AA	AA	AA	AA	AA	AA	AA	AA	AA	AA	AA	AA	AA	AA	AA	AA	AA	AA	AA	AA	AA	AA	AA	AA	AA	AA
chr3_4327502_C_T	3	4327502	TOP	[A/G]	AA	BB	AB	AB	AB	BB	AA	AB	AB	AB	AA	AB	AB	AB	AB	AB	AA	BB	AA	AA	AB	AA	AB	AB	BB	AB	BB	AA	AB	AB	AB	AB	BB	AB	AB	AB	AB	AB	AA	BB	AA	AB	AB	AB	BB
chr3_4354008_A_G	3	4354008	BOT	[T/C]	AA	AA	AA	AA	AA	AA	AA	AA	AA	AA	AA	AA	AA	AA	AA	AA	AA	AA	AA	AA	AA	AA	AA	AA	AA	AA	AA	AA	AA	AA	AA	AA	AA	AA	AA	AA	AA	AA	AA	AA	AA	AA	AA	AA	AA
chr3_4377894_C_T	3	4377894	TOP	[A/G]	BB	BB	BB	BB	BB	BB	BB	BB	BB	BB	BB	BB	BB	BB	BB	BB	BB	BB	BB	BB	BB	BB	BB	BB	BB	BB	BB	BB	BB	BB	BB	BB	BB	BB	BB	BB	BB	BB	BB	BB	BB	BB	BB	BB	BB
chr3_4416763_A_G	3	4416763	TOP	[A/G]	BB	AA	AB	AB	AB	AA	BB	AB	AB	AB	BB	AB	AB	AB	AB	AB	BB	AA	BB	BB	AB	BB	AB	AB	AA	AB	AA	BB	AB	AB	AB	NC	AA	AB	AB	AB	AB	AB	BB	AA	BB	AB	AB	AB	AA
chr3_4422109_A_G	3	4422109	BOT	[T/C]	BB	BB	BB	BB	BB	BB	BB	BB	BB	BB	BB	BB	BB	BB	BB	BB	BB	BB	BB	BB	BB	BB	BB	BB	BB	BB	BB	BB	BB	BB	BB	BB	BB	BB	BB	BB	BB	BB	BB	BB	BB	BB	BB	BB	BB
cn_C_T_chr3_4431276	3	4431276	TOP	[A/G]	BB	BB	BB	BB	BB	BB	BB	BB	BB	BB	BB	BB	BB	BB	BB	BB	BB	BB	BB	BB	BB	BB	BB	BB	BB	BB	BB	BB	BB	BB	BB	BB	BB	BB	BB	BB	BB	BB	BB	BB	BB	BB	BB	BB	BB
chr3_4460021_C_T	3	4460021	TOP	[A/G]	AA	BB	AB	AB	AB	BB	AA	AB	AB	AB	AA	AB	AB	AB	AB	AB	AA	BB	AA	AA	AB	AA	AB	AB	BB	AB	BB	AA	AB	AB	AB	NC	BB	AB	AB	AB	AB	AB	AA	BB	AA	AB	AB	AB	BB
chr3_446933_C_T	3	446933	BOT	[T/C]	BB	BB	AB	AB	AB	AB	BB	AB	AB	AB	BB	AB	AB	AB	AB	AB	BB	AA	BB	BB	AB	BB	BB	AB	AA	AB	AB	BB	AB	AB	BB	AB	AB	BB	AB	AB	AB	BB	BB	AB	BB	AA	AA	AB	AA
chr3_4483700_A_G	3	4483700	TOP	[A/G]	BB	BB	BB	BB	BB	BB	BB	BB	BB	BB	BB	BB	BB	BB	BB	BB	BB	BB	BB	BB	BB	BB	BB	BB	BB	BB	BB	BB	BB	BB	BB	BB	BB	BB	BB	BB	BB	BB	BB	BB	BB	BB	BB	BB	BB
chr3_4484755_C_T	3	4484755	BOT	[T/C]	AA	BB	AB	AB	AB	BB	AA	AB	AB	AB	AA	AB	AB	AB	AB	AB	AA	BB	AA	AA	AB	AA	AB	AB	BB	AB	BB	AA	AB	AB	AB	NC	BB	AB	AB	AB	AB	AB	AA	BB	AA	AB	AB	AB	BB
chr3_4516020_A_G	3	4516020	TOP	[A/G]	BB	AA	AB	AB	AB	AA	BB	AB	AB	AB	BB	AB	AB	AB	AB	AB	BB	AA	BB	BB	AB	BB	AB	AB	AA	AB	AA	BB	AB	AB	AB	NC	AA	AB	AB	AB	AB	AB	BB	AA	BB	AB	AB	AA	AA
chr3_4520158_A_G	3	4520158	TOP	[A/G]	AA	AA	AA	AA	AA	AA	AA	AA	AA	AA	AA	AA	AA	AA	AA	AA	AA	AA	AA	AA	AA	AA	AA	AA	AA	AA	AA	AA	AA	AA	AA	AA	AA	AA	AA	AA	AA	AA	AA	AA	AA	AA	AA	AA	AA
be_C_T_chr3_4524379	3	4524379	TOP	[A/G]	BB	BB	BB	BB	BB	BB	BB	BB	BB	BB	BB	BB	BB	BB	BB	BB	BB	BB	BB	BB	BB	BB	BB	BB	BB	BB	BB	BB	BB	BB	BB	BB	BB	BB	BB	BB	BB	BB	BB	BB	BB	BB	BB	BB	BB
lb_T_C_chr3_4586671	3	4586671	BOT	[T/C]	AA	AA	AA	AA	AA	AA	AA	AA	AA	AA	AA	AA	AA	AA	AA	AA	AA	AA	AA	AA	AA	AA	AA	AA	AA	AA	AA	AA	AA	AA	AA	AA	AA	AA	AA	AA	AA	AA	AA	AA	AA	AA	AA	AA	AA
ae_T_G_chr3_4592204	3	4592204	TOP	[A/C]	AA	AA	AA	AA	AA	AA	AA	AA	AA	AA	AA	AA	AA	AA	AA	AA	AA	AA	AA	AA	AA	AA	AA	AA	AA	AA	AA	AA	AA	AA	AA	AA	AA	AA	AA	AA	AA	AA	AA	AA	AA	AA	AA	AA	AA
chr3_462605_A_C	3	462605	TOP	[A/C]	AA	AA	AA	AA	AA	AA	AA	AA	AA	AA	AA	AA	AA	AA	AA	AA	AA	AA	AA	AA	AA	AA	AA	AA	AA	AA	AA	AA	AA	AA	AA	AA	AA	AA	AA	AA	AA	AA	AA	AA	AA	AA	AA	AA	AA
chr3_4803686_G_T	3	4803686	TOP	[A/C]	BB	AA	AB	AB	AB	AA	BB	AB	AB	AB	BB	AB	AB	AB	AB	AB	BB	AA	BB	BB	AB	BB	AB	AB	AA	AB	AA	BB	AB	AB	AB	NC	AA	AB	AB	AB	AB	AB	BB	AA	BB	AB	AB	AA	AA
chr3_4817506_C_T	3	4817506	TOP	[A/G]	BB	AA	AB	AB	AB	AA	BB	AB	AB	AB	BB	AB	AB	AB	AB	AB	BB	AA	BB	BB	AB	BB	AB	AB	AA	AB	AA	BB	AB	AB	AB	NC	AA	AB	AB	AB	AB	AB	BB	AA	BB	AB	AB	AA	AA
chr3_4831550_C_T	3	4831550	TOP	[A/G]	BB	BB	BB	BB	BB	BB	BB	BB	BB	BB	BB	BB	BB	BB	BB	BB	BB	BB	BB	BB	BB	BB	BB	BB	BB	BB	BB	BB	BB	BB	BB	BB	BB	BB	BB	BB	BB	BB	BB	BB	BB	BB	BB	BB	BB
chr3_4869008_A_C	3	4869008	TOP	[A/C]	AA	BB	AB	AB	AB	BB	AA	AB	AB	AB	AA	AB	AB	AB	AB	AB	AA	BB	AA	AA	AB	AA	AB	AB	BB	AB	BB	AA	AB	AB	AB	NC	BB	AB	AB	AB	AB	AB	AA	AB	AA	AB	AB	BB	BB
chr3_4884640_A_G	3	4884640	BOT	[T/C]	BB	BB	BB	BB	BB	BB	BB	BB	BB	BB	BB	BB	BB	BB	BB	BB	BB	BB	BB	BB	BB	BB	BB	BB	BB	BB	BB	BB	BB	BB	BB	BB	BB	BB	BB	BB	BB	BB	BB	BB	BB	BB	BB	BB	BB
chr3_4910939_C_T	3	4910939	TOP	[A/G]	BB	AA	AB	AB	AB	AA	BB	AB	AB	AB	BB	AB	AB	AB	AB	AB	BB	AA	BB	BB	AB	BB	AB	AB	AA	AB	AA	BB	AB	AB	AB	AA	AA	AB	AB	AB	AB	AB	BB	AB	BB	AB	AB	AA	AA
chr3_4914028_A_C	3	4914028	TOP	[A/C]	BB	BB	BB	BB	BB	BB	BB	BB	BB	BB	BB	BB	BB	BB	BB	BB	BB	BB	BB	BB	BB	BB	BB	BB	BB	BB	BB	BB	BB	BB	BB	BB	BB	BB	BB	BB	BB	BB	BB	BB	BB	BB	BB	BB	BB
chr3_4918261_A_C	3	4918261	TOP	[A/C]	BB	BB	BB	BB	BB	BB	BB	BB	BB	BB	BB	BB	BB	BB	BB	BB	BB	BB	BB	BB	BB	BB	BB	BB	BB	BB	BB	BB	BB	BB	BB	BB	BB	BB	BB	BB	BB	BB	BB	BB	BB	BB	BB	BB	BB
chr3_4929549_A_G	3	4929549	TOP	[A/G]	BB	BB	BB	BB	BB	BB	BB	BB	BB	BB	BB	BB	BB	BB	BB	BB	BB	BB	BB	BB	BB	BB	BB	BB	BB	BB	BB	BB	BB	BB	BB	BB	BB	BB	BB	BB	BB	BB	BB	BB	BB	BB	BB	BB	BB
cn_T_C_chr3_4956374	3	4956374	BOT	[T/C]	AA	AA	AA	AA	AA	AA	AA	AA	AA	AA	AA	AA	AA	AA	AA	AA	AA	AA	AA	AA	AA	AA	AA	AA	AA	AA	AA	AA	AA	AA	AA	AA	AA	AA	AA	AA	AA	AA	AA	AA	AA	AA	AA	AA	AA
be_G_A_chr3_5031664	3	5031664	TOP	[A/G]	BB	BB	BB	BB	BB	BB	BB	BB	BB	BB	BB	BB	BB	BB	BB	BB	BB	BB	BB	BB	BB	BB	BB	BB	BB	BB	BB	BB	BB	BB	BB	BB	BB	BB	BB	BB	BB	BB	BB	BB	BB	BB	BB	BB	BB
chr3_5053543_A_G	3	5053543	BOT	[T/C]	BB	BB	BB	BB	BB	BB	BB	BB	BB	BB	BB	BB	BB	BB	BB	BB	BB	BB	BB	BB	BB	BB	BB	BB	BB	BB	BB	BB	BB	BB	BB	BB	BB	BB	BB	BB	BB	BB	BB	BB	BB	BB	BB	BB	BB
chr3_5062300_A_C	3	5062300	BOT	[T/G]	AA	AA	AA	AA	AA	AA	AA	AA	AA	AA	AA	AA	AA	AA	AA	AA	AA	AA	AA	AA	AA	AA	AA	AA	AA	AA	AA	AA	AA	AA	AA	AA	AA	AA	AA	AA	AA	AA	AA	AA	AA	AA	AA	AA	AA
chr3_5072023_G_T	3	5072023	TOP	[A/C]	AA	AA	AA	AA	AA	AA	AA	AA	AA	AA	AA	AA	AA	AA	AA	AA	AA	AA	AA	AA	AA	AA	AA	AA	AA	AA	AA	AA	AA	AA	AA	AA	AA	AA	AA	AA	AA	AA	AA	AA	AA	AA	AA	AA	AA
chr3_5094434_C_T	3	5094434	TOP	[A/G]	AA	AA	AA	AA	AA	AA	AA	AA	AA	AA	AA	AA	AA	AA	AA	AA	AA	AA	AA	AA	AA	AA	AA	AA	AA	AA	AA	AA	AA	AA	AA	AA	AA	AA	AA	AA	AA	AA	AA	AA	AA	AA	AA	AA	AA
chr3_5116559_A_G	3	5116559	BOT	[T/C]	BB	BB	BB	BB	BB	BB	BB	BB	BB	BB	BB	BB	BB	BB	BB	BB	BB	BB	BB	BB	BB	BB	BB	BB	BB	BB	BB	BB	BB	BB	BB	BB	BB	BB	BB	BB	BB	BB	BB	BB	BB	BB	BB	BB	BB
chr3_5121011_G_T	3	5121011	BOT	[T/G]	AA	AA	AA	AA	AA	AA	AA	AA	AA	AA	AA	AA	AA	AA	AA	AA	AA	AA	AA	AA	AA	AA	AA	AA	AA	AA	AA	AA	AA	AA	AA	AA	AA	AA	AA	AA	AA	AA	AA	AA	AA	AA	AA	AA	AA
chr3_5141218_G_T	3	5141218	BOT	[T/G]	BB	BB	BB	BB	BB	BB	BB	BB	BB	BB	BB	BB	BB	BB	BB	BB	BB	BB	BB	BB	BB	BB	BB	BB	BB	BB	BB	BB	BB	BB	BB	BB	BB	BB	BB	BB	BB	BB	BB	BB	BB	BB	BB	BB	BB
chr3_5202339_A_G	3	5202339	TOP	[A/G]	BB	AA	AB	AB	AB	AB	BB	AB	AB	AB	BB	AB	AB	AB	AB	AB	BB	AA	BB	BB	BB	BB	AB	AB	AA	AB	AA	BB	AB	AB	AB	NC	AB	AB	AB	AB	AB	AB	BB	AB	BB	AA	AB	AB	AA
chr3_5218171_A_G	3	5218171	BOT	[T/C]	AA	AA	AA	AA	AA	AA	AA	AA	AA	AA	AA	AA	AA	AA	AA	AA	AA	AA	AA	AA	AA	AA	AA	AA	AA	AA	AA	AA	AA	AA	AA	AA	AA	AA	AA	AA	AA	AA	AA	AA	AA	AA	AA	AA	AA
chr3_5226681_G_T	3	5226681	BOT	[T/G]	BB	BB	BB	BB	BB	BB	BB	BB	BB	BB	BB	BB	BB	BB	BB	BB	BB	BB	BB	BB	BB	BB	BB	BB	BB	BB	BB	BB	BB	BB	BB	BB	BB	BB	BB	BB	BB	BB	BB	BB	BB	BB	BB	BB	BB
chr3_5227563_A_G	3	5227563	BOT	[T/C]	AA	AA	AA	AA	AA	AA	AA	AA	AA	AA	AA	AA	AA	AA	AA	AA	AA	AA	AA	AA	AA	AA	AA	AA	AA	AA	AA	AA	AA	AA	AA	AA	AA	AA	AA	AA	AA	AA	AA	AA	AA	AA	AA	AA	AA
chr3_5260605_C_T	3	5260605	TOP	[A/G]	AA	AA	AA	AA	AA	AA	AA	AA	AA	AA	AA	AA	AA	AA	AA	AA	AA	AA	AA	AA	AA	AA	AA	AA	AA	AA	AA	AA	AA	AA	AA	AA	AA	AA	AA	AA	AA	AA	AA	AA	AA	AA	AA	AA	AA
chr3_5267545_A_C	3	5267545	TOP	[A/C]	BB	AA	AB	AB	AB	AB	BB	AB	AB	AB	BB	AB	AB	AB	AB	AB	BB	AA	BB	BB	BB	BB	AB	AB	AA	AB	AA	BB	AB	AB	AB	NC	AB	AB	AB	AB	AB	AB	BB	AB	BB	AA	AB	AB	AA
chr3_5280555_A_G	3	5280555	BOT	[T/C]	BB	AA	AB	AB	AB	AB	BB	AB	AB	AB	BB	AB	AB	AB	AB	AB	BB	AA	BB	BB	BB	BB	AB	AB	AA	AB	AA	BB	AB	AB	AB	NC	AB	AB	AB	AB	AB	AB	BB	AB	BB	AA	AB	AB	AA
chr3_5308382_A_C	3	5308382	TOP	[A/C]	BB	BB	BB	BB	BB	BB	BB	BB	BB	BB	BB	BB	BB	BB	BB	BB	BB	BB	BB	BB	BB	BB	BB	BB	BB	BB	BB	BB	BB	BB	BB	BB	BB	BB	BB	BB	BB	BB	BB	BB	BB	BB	BB	BB	BB
chr3_532608_A_G	3	532608	TOP	[A/G]	BB	BB	BB	BB	BB	BB	BB	BB	BB	BB	BB	BB	BB	BB	BB	BB	BB	BB	BB	BB	BB	BB	BB	BB	BB	BB	BB	BB	BB	BB	BB	NC	BB	BB	BB	BB	BB	BB	BB	BB	BB	BB	BB	BB	BB
chr3_5366491_A_G	3	5366491	BOT	[T/C]	AA	AA	AA	AA	AA	AA	AA	AA	AA	AA	AA	AA	AA	AA	AA	AA	AA	AA	AA	AA	AA	AA	AA	AA	AA	AA	AA	AA	AA	AA	AA	AA	AA	AA	AA	AA	AA	AA	AA	AA	AA	AA	AA	AA	AA
chr3_5407657_G_T	3	5407657	TOP	[A/C]	AA	AA	AA	AA	AA	AA	AA	AA	AA	AA	AA	AA	AA	AA	AA	AA	AA	AA	AA	AA	AA	AA	AA	AA	AA	AA	AA	AA	AA	AA	AA	AA	AA	AA	AA	AA	AA	AA	AA	AA	AA	AA	AA	AA	AA
chr3_5413110_C_T	3	5413110	BOT	[T/C]	BB	BB	BB	BB	BB	BB	BB	BB	BB	BB	BB	BB	BB	BB	BB	BB	BB	BB	BB	BB	BB	BB	BB	BB	BB	BB	BB	BB	BB	BB	BB	BB	BB	BB	BB	BB	BB	BB	BB	BB	BB	BB	BB	BB	BB
chr3_542634_G_T	3	542634	TOP	[A/C]	AA	AA	AB	AB	AB	AB	AA	AB	AB	AB	AA	AB	AB	AB	AB	AB	AA	BB	AA	AA	AB	AA	AA	AB	BB	AB	AB	AA	AB	AB	AA	NC	AB	AA	AB	AB	AB	AA	AA	AB	AA	BB	BB	AB	BB
chr3_5463233_A_G	3	5463233	TOP	[A/G]	BB	BB	BB	BB	BB	BB	BB	BB	BB	BB	BB	BB	BB	BB	BB	BB	BB	BB	BB	BB	BB	BB	BB	BB	BB	BB	BB	BB	BB	BB	BB	BB	BB	BB	BB	BB	BB	BB	BB	BB	BB	BB	BB	BB	BB
be_C_A_chr3_5463929	3	5463929	TOP	[A/C]	BB	BB	BB	BB	BB	BB	BB	BB	BB	BB	BB	BB	BB	BB	BB	BB	BB	BB	BB	BB	BB	BB	BB	BB	BB	BB	BB	BB	BB	BB	BB	BB	BB	BB	BB	BB	BB	BB	BB	BB	BB	BB	BB	BB	BB
cn_G_A_chr3_5473663	3	5473663	TOP	[A/G]	BB	BB	BB	BB	BB	BB	BB	BB	BB	BB	BB	BB	BB	BB	BB	BB	BB	BB	BB	BB	BB	BB	BB	BB	BB	BB	BB	BB	BB	BB	BB	BB	BB	BB	BB	BB	BB	BB	BB	BB	BB	BB	BB	BB	BB
chr3_5518964_A_G	3	5518964	BOT	[T/C]	AA	BB	AB	AB	AB	AB	AA	AB	AB	AB	AA	AB	AB	AB	AB	AB	AA	BB	AA	AA	AA	AA	AB	AB	BB	AB	BB	AA	AB	AB	AA	NC	AB	AB	AB	AB	AB	AB	AA	AB	AA	BB	AB	AB	BB
chr3_5519531_A_G	3	5519531	TOP	[A/G]	BB	AA	AB	AB	AB	AB	BB	AB	AB	AB	BB	AB	AB	AB	AB	AB	BB	AA	BB	BB	BB	BB	AB	AB	AA	AB	AA	BB	AB	AB	BB	NC	AB	AB	AB	AB	AB	AB	BB	AB	BB	AA	AB	AB	AA
ae_G_T_chr3_5544070	3	5544070	TOP	[A/C]	BB	BB	BB	BB	BB	BB	BB	BB	BB	BB	BB	BB	BB	BB	BB	BB	BB	BB	BB	BB	BB	BB	BB	BB	BB	BB	BB	BB	BB	BB	BB	BB	BB	BB	BB	BB	BB	BB	BB	BB	BB	BB	BB	BB	BB
lb_G_T_chr3_5552271	3	5552271	TOP	[A/C]	AA	NC	AA	AA	AA	AA	AA	AA	AA	AA	AA	AA	AA	AA	AA	AA	AA	AA	AA	AA	AA	AA	AA	AA	AA	AA	AA	AA	AA	AA	AA	AA	AA	AA	AA	AA	AA	AA	AA	AA	AA	NC	AA	AA	NC
chr3_5555880_C_T	3	5555880	TOP	[A/G]	AA	BB	AB	AB	AB	AB	AA	AB	AB	AB	AA	AB	AB	AB	AB	AB	AA	BB	AA	AA	AA	AA	AB	AB	BB	AB	BB	AA	AB	AB	AA	NC	AB	AB	AB	AB	AB	AB	AA	AB	AA	BB	AB	AB	BB
chr3_5567252_C_T	3	5567252	BOT	[T/C]	BB	BB	BB	BB	BB	BB	BB	BB	BB	BB	BB	BB	BB	BB	BB	BB	BB	BB	BB	BB	BB	BB	BB	BB	BB	BB	BB	BB	BB	BB	BB	NC	BB	BB	BB	BB	BB	BB	BB	BB	BB	BB	BB	BB	BB
chr3_5571836_C_T	3	5571836	TOP	[A/G]	AA	AA	AA	AA	AA	AA	AA	AA	AA	AA	AA	AA	AA	AA	AA	AA	AA	AA	AA	AA	AA	AA	AA	AA	AA	AA	AA	AA	AA	AA	AA	AA	AA	AA	AA	AA	AA	AA	AA	AA	AA	AA	AA	AA	AA
chr3_5590123_A_G	3	5590123	TOP	[A/G]	BB	BB	BB	BB	BB	BB	BB	BB	BB	BB	BB	BB	BB	BB	BB	BB	BB	BB	BB	BB	BB	BB	BB	BB	BB	BB	BB	BB	BB	BB	BB	BB	BB	BB	BB	BB	BB	BB	BB	BB	BB	BB	BB	BB	BB
chr3_5650961_A_G	3	5650961	TOP	[A/G]	AA	AA	AA	AA	AA	AA	AA	AA	AA	AA	AA	AA	AA	AA	AA	AA	AA	AA	AA	AA	AA	AA	AA	AA	AA	AA	AA	AA	AA	AA	AA	AA	AA	AA	AA	AA	AA	AA	AA	AA	AA	AA	AA	AA	AA
chr3_566927_A_G	3	566927	BOT	[T/C]	AA	AA	AA	AA	AA	AA	AA	AA	AA	AA	AA	AA	AA	AA	AA	AA	AA	AA	AA	AA	AA	AA	AA	AA	AA	AA	AA	AA	AA	AA	AA	AA	AA	AA	AA	AA	AA	AA	AA	AA	AA	AA	AA	AA	AA
chr3_5670142_C_T	3	5670142	BOT	[T/C]	BB	BB	BB	BB	BB	BB	BB	BB	BB	BB	BB	BB	BB	BB	BB	BB	BB	BB	BB	BB	BB	BB	BB	BB	BB	BB	BB	BB	BB	BB	BB	BB	BB	BB	BB	BB	BB	BB	BB	BB	BB	BB	BB	BB	BB
chr3_5677935_C_T	3	5677935	TOP	[A/G]	AA	AA	AA	AA	AA	AA	AA	AA	AA	AA	AA	AA	AA	AA	AA	AA	AA	AA	AA	AA	AA	AA	AA	AA	AA	AA	AA	AA	AA	AA	AA	AA	AA	AA	AA	AA	AA	AA	AA	AA	AA	AA	AA	AA	AA
chr3_5704269_A_G	3	5704269	TOP	[A/G]	AA	AA	AA	AA	AA	AA	AA	AA	AA	AA	AA	AA	AA	AA	AA	AA	AA	AA	AA	AA	AA	AA	AA	AA	AA	AA	AA	AA	AA	AA	AA	AB	AA	AA	AA	AA	AA	AA	AA	AA	AA	AA	AA	AA	AA
chr3_5721305_C_T	3	5721305	BOT	[T/C]	AA	AA	AA	AA	AA	AA	AA	AA	AA	AA	AA	AA	AA	AA	AA	AA	AA	AA	AA	AA	AA	AA	AA	AA	AA	AA	AA	AA	AA	AA	AA	AA	AA	AA	AA	AA	AA	AA	AA	AA	AA	AA	AA	AA	AA
chr3_5724485_C_T	3	5724485	BOT	[T/C]	AA	BB	AB	AB	AB	AB	AA	AB	AB	AB	AA	AB	AB	AB	AB	AB	AA	BB	AA	AA	AA	AA	AB	AB	BB	AB	AB	AA	AB	AB	AA	NC	AB	AB	AB	AB	AB	AB	AA	AB	AA	BB	AB	AB	BB
chr3_574803_A_G	3	574803	BOT	[T/C]	AA	AB	AB	AB	AB	AB	AA	AB	AB	AB	AA	AB	AB	AB	AB	AB	AA	BB	AA	AA	AB	AA	AA	AB	BB	AB	AB	AA	AB	AB	AA	NC	AB	AA	AB	AB	AB	AA	AA	AB	AA	BB	BB	AB	BB
chr3_5762693_C_T	3	5762693	TOP	[A/G]	BB	BB	BB	BB	BB	BB	BB	BB	BB	BB	BB	BB	BB	BB	BB	BB	BB	BB	BB	BB	BB	BB	BB	BB	BB	BB	BB	BB	BB	BB	BB	BB	BB	BB	BB	BB	BB	BB	BB	BB	BB	BB	BB	BB	BB
chr3_5766112_A_G	3	5766112	TOP	[A/G]	BB	BB	BB	BB	BB	BB	BB	BB	BB	BB	BB	BB	BB	BB	BB	BB	BB	BB	BB	BB	BB	BB	BB	BB	BB	BB	BB	BB	BB	BB	BB	BB	BB	BB	BB	BB	BB	BB	BB	BB	BB	BB	BB	BB	BB
li_T_C_chr3_5801744	3	5801744	TOP	[A/G]	AA	AA	AA	AA	AA	AA	AA	AA	AA	AA	AA	AA	AA	AA	AA	AA	AA	AA	AA	AA	AA	AA	AA	AA	AA	AA	AA	AA	AA	AA	AA	AA	AA	AA	AA	AA	AA	AA	AA	AA	AA	AA	AA	AA	AA
chr3_5808599_A_G	3	5808599	TOP	[A/G]	AA	BB	AB	AB	AB	AB	AA	AB	AB	AB	AA	AB	AB	AB	AB	AB	AA	BB	AA	AA	AA	AA	AB	AA	BB	AB	AB	AA	AB	AB	AA	NC	AB	AB	AB	AB	AB	AB	AA	AB	AA	BB	AB	AB	BB
chr3_5814305_A_G	3	5814305	TOP	[A/G]	AA	BB	AB	AB	AB	AB	AA	AB	AB	AB	AA	AB	AB	AB	AB	AB	AA	BB	AA	AA	AA	AA	AB	AA	BB	AB	AB	AA	AB	AB	AA	NC	AB	AB	AB	AB	AB	AB	AA	AB	AA	BB	AB	AB	BB
chr3_5857795_A_C	3	5857795	TOP	[A/C]	AA	BB	AB	AB	AB	AB	AA	AB	AB	AB	AA	AB	AB	AB	AB	AB	AA	BB	AA	AA	AA	AA	AB	AA	BB	AB	AB	AA	AB	AB	AA	NC	AB	AB	AB	AB	AB	AB	AA	AB	AA	BB	AB	AB	BB
chr3_5869867_G_T	3	5869867	TOP	[A/C]	BB	BB	BB	BB	BB	BB	BB	BB	BB	BB	BB	BB	BB	BB	BB	BB	BB	BB	BB	BB	BB	BB	BB	BB	BB	BB	BB	BB	BB	BB	BB	BB	BB	BB	BB	BB	BB	BB	BB	BB	BB	BB	BB	BB	BB
chr3_5873102_A_G	3	5873102	BOT	[T/C]	AA	AA	AA	AA	AA	AA	AA	AA	AA	AA	AA	AA	AA	AA	AA	AA	AA	AA	AA	AA	AA	AA	AA	AA	AA	AA	AA	AA	AA	AA	AA	AA	AA	AA	AA	AA	AA	AA	AA	AA	AA	AA	AA	AA	AA
chr3_5887310_A_C	3	5887310	TOP	[A/C]	AA	BB	AB	AB	AB	AB	AA	AB	AB	AB	AA	AB	AB	AB	AB	AB	AA	BB	AA	AA	AA	AA	AB	AA	BB	AB	AB	AA	AB	AB	AA	NC	AB	AB	AB	AB	AB	AB	AA	AB	AA	BB	AB	AB	BB
cn_G_A_chr3_5907905	3	5907905	BOT	[T/C]	BB	BB	BB	BB	BB	BB	BB	BB	BB	BB	BB	BB	BB	BB	BB	BB	BB	BB	BB	BB	BB	BB	BB	BB	BB	BB	BB	BB	BB	BB	BB	BB	BB	BB	BB	BB	BB	BB	BB	BB	BB	BB	BB	BB	BB
chr3_5914662_C_T	3	5914662	BOT	[T/C]	BB	BB	BB	BB	BB	BB	BB	BB	BB	BB	BB	BB	BB	BB	BB	BB	BB	BB	BB	BB	BB	BB	BB	BB	BB	BB	BB	BB	BB	BB	BB	BB	BB	BB	BB	BB	BB	BB	BB	BB	BB	BB	BB	BB	BB
chr3_5942463_C_T	3	5942463	TOP	[A/G]	AA	AA	AA	AA	AA	AA	AA	AA	AA	AA	AA	AA	AA	AA	AA	AA	AA	AA	AA	AA	AA	AA	AA	AA	AA	AA	AA	AA	AA	AA	AA	AA	AA	AA	AA	AA	AA	AA	AA	AA	AA	AA	AA	AA	AA
chr3_595713_A_G	3	595713	BOT	[T/C]	BB	BB	BB	BB	BB	BB	BB	BB	BB	BB	BB	BB	BB	BB	BB	BB	BB	BB	BB	BB	BB	BB	BB	BB	BB	BB	BB	BB	BB	BB	BB	BB	BB	BB	BB	BB	BB	BB	BB	BB	BB	BB	BB	BB	BB
chr3_5968917_C_T	3	5968917	TOP	[A/G]	BB	AA	AB	AB	AB	AA	BB	AB	AA	AB	BB	AB	AB	AB	AB	AB	BB	AA	BB	BB	AB	BB	AB	AB	AA	AB	AA	BB	AB	AB	AB	AB	AA	AB	AB	AB	AB	AB	BB	AA	BB	AB	AB	AB	AA
chr3_5994579_C_T	3	5994579	BOT	[T/C]	AA	BB	AB	AB	AB	BB	AA	AB	BB	AB	AA	AB	AB	AB	AB	AB	AA	BB	AA	AA	AB	AA	AB	AB	BB	AB	BB	AA	AB	AB	AB	AB	BB	AB	AB	AB	AB	AB	AA	BB	AA	AB	AB	AB	BB
be_T_C_chr3_6004158	3	6004158	TOP	[A/G]	AA	AA	AA	AA	AA	AA	AA	AA	AA	AA	AA	AA	AA	AA	AA	AA	AA	AA	AA	AA	AA	AA	AA	AA	AA	AA	AA	AA	AA	AA	AA	AA	AA	AA	AA	AA	AA	AA	AA	AA	AA	AA	AA	AA	AA
chr3_6013378_C_T	3	6013378	TOP	[A/G]	NC	AA	AB	AB	AB	AA	BB	AB	AA	AB	BB	AB	AB	AB	AB	AB	BB	AA	BB	BB	AB	BB	AB	AB	AA	AB	AA	BB	AB	AB	AB	AB	AA	AB	AB	AB	AB	AB	BB	AA	BB	AB	AB	AB	AA
chr3_6020386_G_T	3	6020386	BOT	[T/G]	BB	BB	BB	BB	BB	BB	BB	BB	BB	BB	BB	BB	BB	BB	BB	BB	BB	BB	BB	BB	BB	BB	BB	BB	BB	BB	BB	BB	BB	BB	BB	BB	BB	BB	BB	BB	BB	BB	BB	BB	BB	BB	BB	BB	BB
lb_A_C_chr3_6036019	3	6036019	BOT	[T/G]	AA	AA	AA	AA	AA	AA	AA	AA	AA	AA	AA	AA	AA	AA	AA	AA	AA	AA	AA	AA	AA	AA	AA	AA	AA	AA	AA	AA	AA	AA	AA	AA	AA	AA	AA	AA	AA	AA	AA	AA	AA	AA	AA	AA	AA
chr3_6065579_C_T	3	6065579	BOT	[T/C]	AA	AA	AA	AA	AA	AA	AA	AA	AA	AA	AA	AA	AA	AA	AA	AA	AA	AA	AA	AA	AA	AA	AA	AA	AA	AA	AA	AA	AA	AA	AA	AA	AA	AA	AA	AA	AA	AA	AA	AA	AA	AA	AA	AA	AA
chr3_6074070_C_T	3	6074070	BOT	[T/C]	BB	AA	AB	AB	AB	AA	BB	AB	AA	AB	BB	AB	AB	AB	AB	AB	BB	AA	BB	BB	AB	BB	AB	AB	AA	AB	AA	BB	AB	AB	AB	AB	AA	AB	AB	AB	AB	AB	BB	AA	BB	AB	AB	AB	AA
chr3_6101000_A_G	3	6101000	TOP	[A/G]	AA	BB	AB	AB	AB	BB	AA	AB	BB	AB	AA	AB	AB	AB	AB	AB	AA	BB	AA	AA	AB	AA	AB	AB	BB	AB	BB	AA	AB	AB	AB	AB	BB	AB	AB	AB	AB	AB	AA	BB	AA	AB	AB	AB	BB
chr3_6117585_A_G	3	6117585	BOT	[T/C]	BB	BB	BB	BB	BB	BB	BB	BB	BB	BB	BB	BB	BB	BB	BB	BB	BB	BB	BB	BB	BB	BB	BB	BB	BB	BB	BB	BB	BB	BB	BB	BB	BB	BB	BB	BB	BB	BB	BB	BB	BB	BB	BB	BB	BB
mu_s_A_G_chr3_6125574	3	6125574	TOP	[A/G]	AA	AA	AA	AA	AA	AA	AA	AA	AA	AA	AA	AA	AA	AA	AA	AA	AA	AA	AA	AA	AA	AA	AA	AA	AA	AA	AA	AA	AA	AA	AA	AA	AA	AA	AA	AA	AA	AA	AA	AA	AA	AA	AA	AA	AA
chr3_6173673_A_C	3	6173673	TOP	[A/C]	BB	BB	BB	BB	BB	BB	BB	BB	BB	BB	BB	BB	BB	BB	BB	BB	BB	BB	BB	BB	BB	BB	BB	BB	BB	BB	BB	BB	BB	BB	BB	BB	BB	BB	BB	BB	BB	BB	BB	BB	BB	BB	BB	BB	BB
chr3_6179234_A_G	3	6179234	BOT	[T/C]	BB	BB	BB	BB	BB	BB	BB	BB	BB	BB	BB	BB	BB	BB	BB	BB	BB	BB	BB	BB	BB	BB	BB	BB	BB	BB	BB	BB	BB	BB	BB	BB	BB	BB	BB	BB	BB	BB	BB	BB	BB	BB	BB	BB	BB
chr3_6197402_G_T	3	6197402	BOT	[T/G]	BB	NC	BB	BB	BB	NC	BB	BB	NC	BB	BB	BB	BB	BB	BB	BB	BB	BB	BB	BB	BB	BB	BB	BB	NC	BB	BB	BB	BB	BB	BB	BB	NC	BB	BB	BB	BB	BB	BB	NC	BB	BB	BB	BB	NC
chr3_6208949_A_G	3	6208949	TOP	[A/G]	AA	BB	AB	AB	AB	BB	AA	AB	BB	AB	AA	AB	AB	AB	AB	AB	AA	AB	AA	AA	AB	AA	AB	AB	BB	AB	BB	AA	AB	AB	AB	AB	BB	AB	AB	AB	AB	AB	AA	BB	AA	AB	AB	AB	BB
chr3_621609_C_T	3	621609	TOP	[A/G]	BB	AB	AB	AB	AB	AB	BB	AB	AB	AB	BB	AB	AB	AB	AB	AB	BB	AA	BB	BB	AB	BB	BB	AB	AA	AB	AB	BB	AB	AB	BB	NC	AB	BB	AB	AB	AB	BB	BB	AB	BB	AA	AA	AB	AA
chr3_6216902_C_T	3	6216902	BOT	[T/C]	NC	BB	AB	AB	AB	BB	AA	AB	BB	AB	AA	AB	AB	AB	AB	AB	AA	AB	AA	AA	AB	AA	AB	AB	BB	AB	BB	AA	AB	AB	AB	AB	BB	AB	AB	AB	AB	AB	AA	BB	AA	AB	AB	AB	BB
chr3_6232647_C_T	3	6232647	BOT	[T/C]	AA	BB	AB	AB	AB	BB	AA	AB	BB	AB	AA	AB	AB	AB	AB	AB	AA	AB	AA	AA	AB	AA	AB	AB	BB	AB	BB	AA	AB	AB	AB	AB	BB	AA	AB	AB	AB	AB	AA	BB	AA	AB	AB	AB	BB
chr3_624754_C_T	3	624754	BOT	[T/C]	AA	AA	AA	AA	AA	AA	AA	AA	AA	AA	AA	AA	AA	AA	AA	AA	AA	AA	AA	AA	AA	AA	AA	AA	AA	AA	AA	AA	AA	AA	AA	AA	AA	AA	AA	AA	AA	AA	AA	AA	AA	AA	AA	AA	AA
chr3_6265605_A_C	3	6265605	TOP	[A/C]	BB	NC	BB	BB	BB	NC	BB	BB	NC	BB	BB	BB	BB	BB	BB	BB	BB	BB	BB	BB	BB	BB	BB	BB	NC	BB	NC	BB	BB	BB	BB	BB	NC	BB	BB	BB	BB	BB	BB	NC	BB	BB	BB	BB	NC
chr3_6281901_A_G	3	6281901	TOP	[A/G]	NC	BB	AB	AB	AB	BB	AA	AB	BB	AB	AA	AB	AB	AB	AB	AB	AA	AB	AA	AA	AB	AA	AB	AB	BB	AB	BB	AA	AB	AB	AB	AB	BB	AA	AB	AB	AB	AB	AA	BB	AA	AB	AB	AB	BB
chr3_635257_G_T	3	635257	BOT	[T/G]	AA	AA	AA	AA	AA	AA	AA	AA	AA	AA	AA	AA	AA	AA	AA	AA	AA	AA	AA	AA	AA	AA	AA	AA	AA	AA	AA	AA	AA	AA	AA	AA	AA	AA	AA	AA	AA	AA	AA	AA	AA	AA	AA	AA	AA
cn_A_G_chr3_6361027	3	6361027	BOT	[T/C]	AA	AA	AA	AA	AA	AA	AA	AA	AA	AA	AA	AA	AA	AA	AA	AA	AA	AA	AA	AA	AA	AA	AA	AA	AA	AA	AA	AA	AA	AA	AA	AA	AA	AA	AA	AA	AA	AA	AA	AA	AA	AA	AA	AA	AA
chr3_6361577_A_C	3	6361577	TOP	[A/C]	BB	AA	AB	AB	AB	AA	BB	AB	AA	AB	BB	AB	AB	AB	AB	AB	BB	AB	BB	BB	AB	BB	AB	AB	AA	AB	AA	BB	AB	AB	AB	AB	AA	BB	AB	AB	AB	AB	BB	AA	BB	AB	AB	AB	AA
li_T_C_chr3_636319	3	636319	BOT	[T/C]	AA	AA	AA	AA	AA	AA	AA	AA	AA	AA	AA	AA	AA	AA	AA	AA	AA	AA	AA	AA	AA	AA	AA	AA	AA	AA	AA	AA	AA	AA	AA	NC	AA	AA	AA	AA	AA	AA	AA	AA	AA	AA	AA	AA	AA
chr3_6364472_C_T	3	6364472	BOT	[T/C]	BB	BB	BB	BB	BB	BB	BB	BB	BB	BB	BB	BB	BB	BB	BB	BB	BB	BB	BB	BB	BB	BB	BB	BB	BB	BB	BB	BB	BB	BB	BB	BB	BB	BB	BB	BB	BB	BB	BB	BB	BB	BB	BB	BB	BB
mu_s_C_T_chr3_6385895	3	6385895	BOT	[T/C]	BB	BB	BB	BB	BB	BB	BB	BB	BB	BB	BB	BB	BB	BB	BB	BB	BB	BB	BB	BB	BB	BB	BB	BB	BB	BB	BB	BB	BB	BB	BB	BB	BB	BB	BB	BB	BB	BB	BB	BB	BB	BB	BB	BB	BB
chr3_6425122_A_C	3	6425122	TOP	[A/C]	BB	BB	BB	BB	BB	BB	BB	BB	BB	BB	BB	BB	BB	BB	BB	BB	BB	BB	BB	BB	BB	BB	BB	BB	BB	BB	BB	BB	BB	BB	BB	BB	BB	BB	BB	BB	BB	BB	BB	BB	BB	BB	BB	BB	BB
chr3_647520_C_T	3	647520	TOP	[A/G]	AA	AA	AA	AA	AA	AA	AA	AA	AA	AA	AA	AA	AA	AA	AA	AA	AA	AA	AA	AA	AA	AA	AA	AA	AA	AA	AA	AA	AA	AA	AA	AA	AA	AA	AA	AA	AA	AA	AA	AA	AA	AA	AA	AA	AA
chr3_6478859_C_T	3	6478859	TOP	[A/G]	BB	BB	BB	BB	BB	BB	BB	BB	BB	BB	BB	BB	BB	BB	BB	BB	BB	BB	BB	BB	BB	BB	BB	BB	BB	BB	BB	BB	BB	BB	BB	BB	BB	BB	BB	BB	BB	BB	BB	BB	BB	BB	BB	BB	BB
chr3_6479610_C_T	3	6479610	BOT	[T/C]	AA	AA	AA	AA	AA	AA	AA	AA	AA	AA	AA	AA	AA	AA	AA	AA	AA	AA	AA	AA	AA	AA	AA	AA	AA	AA	AA	AA	AA	AA	AA	AA	AA	AA	AA	AA	AA	AA	AA	AA	AA	AA	AA	AA	AA
chr3_6493834_G_T	3	6493834	BOT	[T/G]	AA	AA	AA	AA	AA	AA	AA	AA	AA	AA	AA	AA	AA	AA	AA	AA	AA	AA	AA	AA	AA	AA	AA	AA	AA	AA	AA	AA	AA	AA	AA	AA	AA	AA	AA	AA	AA	AA	AA	AA	AA	AA	AA	AA	AA
chr3_6498521_C_T	3	6498521	BOT	[T/C]	AA	AA	AA	AA	AA	AA	AA	AA	AA	AA	AA	AA	AA	AA	AA	AA	AA	AA	AA	AA	AA	AA	AA	AA	AA	AA	AA	AA	AA	AA	AA	AA	AA	AA	AA	AA	AA	AA	AA	AA	AA	AA	AA	AA	AA
ae_A_G_chr3_6502774	3	6502774	TOP	[A/G]	AA	AA	AA	AA	AA	AA	AA	AA	AA	AA	AA	AA	AA	AA	AA	AA	AA	AA	AA	AA	AA	AA	AA	AA	AA	AA	AA	AA	AA	AA	AA	AA	AA	AA	AA	AA	AA	AA	AA	AA	AA	AA	AA	AA	AA
lb_T_C_chr3_6512219	3	6512219	BOT	[T/C]	AA	AA	AA	AA	AA	AA	AA	AA	AA	AA	AA	AA	AA	AA	AA	AA	AA	AA	AA	AA	AA	AA	AA	AA	AA	AA	AA	AA	AA	AA	AA	AA	AA	AA	AA	AA	AA	AA	AA	AA	AA	AA	AA	AA	AA
chr3_6512337_G_T	3	6512337	BOT	[T/G]	AA	AA	AA	AA	AA	AA	AA	AA	AA	AA	AA	AA	AA	AA	AA	AA	AA	AA	AA	AA	AA	AA	AA	AA	AA	AA	AA	AA	AA	AA	AA	AA	AA	AA	AA	AA	AA	AA	AA	AA	AA	AA	AA	AA	AA
chr3_6551533_C_T	3	6551533	BOT	[T/C]	BB	BB	BB	BB	BB	BB	BB	BB	BB	BB	BB	BB	BB	BB	BB	BB	BB	BB	BB	BB	BB	BB	BB	BB	BB	BB	BB	BB	BB	BB	BB	BB	BB	BB	BB	BB	BB	BB	BB	BB	BB	BB	BB	BB	BB
chr3_6567365_C_T	3	6567365	BOT	[T/C]	AA	BB	AB	BB	AB	BB	AA	AB	BB	AB	AA	AB	AB	AB	AB	AB	AA	AB	AA	AA	AB	AA	AB	AB	BB	AB	BB	AA	AB	AB	AB	AB	BB	AA	AB	AB	AB	AB	AA	BB	AA	AB	AB	AB	BB
chr3_6573568_C_T	3	6573568	BOT	[T/C]	AA	BB	AB	BB	AB	BB	AA	AB	BB	AB	AA	AB	AB	AB	AB	AB	AA	AB	AA	AA	AB	AA	AB	AB	BB	AB	BB	AA	AB	AB	AB	AB	BB	AA	AB	AB	AB	AB	AA	BB	AA	AB	AB	AB	BB
chr3_6590909_C_T	3	6590909	BOT	[T/C]	NC	BB	AB	BB	AB	BB	AA	AB	BB	AB	AA	AB	AB	AB	AB	AB	AA	AB	AA	AA	AB	AA	AB	AB	BB	AB	BB	AA	AB	AB	AB	AB	BB	AA	AB	AB	AB	AB	AA	BB	AA	AB	AB	AB	BB
chr3_6633827_C_T	3	6633827	BOT	[T/C]	AA	AA	AA	AA	AA	AA	AA	AA	AA	AA	AA	AA	AA	AA	AA	AA	AA	AA	AA	AA	AA	AA	AA	AA	AA	AA	AA	AA	AA	AA	AA	AA	AA	AA	AA	AA	AA	AA	AA	AA	AA	AA	AA	AA	AA
chr3_6687573_G_T	3	6687573	BOT	[T/G]	BB	BB	BB	BB	BB	BB	BB	BB	BB	BB	BB	BB	BB	BB	BB	BB	BB	BB	BB	BB	BB	BB	BB	BB	BB	BB	BB	BB	BB	BB	BB	BB	BB	BB	BB	BB	BB	BB	BB	BB	BB	BB	BB	BB	BB
chr3_6704749_C_T	3	6704749	TOP	[A/G]	AA	AA	AA	AA	AA	AA	AA	AA	AA	AA	AA	AA	AA	AA	AA	AA	AA	AA	AA	AA	AA	AA	AA	AA	AA	AA	AA	AA	AA	AA	AA	AA	AA	AA	AA	AA	AA	AA	AA	AA	AA	AA	AA	AA	AA
chr3_673928_C_T	3	673928	TOP	[A/G]	BB	AB	AB	AB	AB	AB	BB	AB	AB	AB	BB	AB	AB	AB	AB	AB	BB	AA	BB	BB	AB	BB	BB	AB	AA	AB	AB	BB	AB	AB	BB	NC	AB	BB	AB	AB	AB	BB	BB	AB	BB	AA	AA	AB	AA
chr3_6771630_C_T	3	6771630	BOT	[T/C]	AA	AA	AA	AA	AA	AA	AA	AA	AA	AA	AA	AA	AA	AA	AA	AA	AA	AA	AA	AA	AA	AA	AA	AA	AA	AA	AA	AA	AA	AA	AA	AA	AA	AA	AA	AA	AA	AA	AA	AA	AA	AA	AA	AA	AA
chr3_6787047_C_T	3	6787047	TOP	[A/G]	AA	AA	AA	AA	AA	AA	AA	AA	AA	AA	AA	AA	AA	AA	AA	AA	AA	AA	AA	AA	AA	AA	AA	AA	AA	AA	AA	AA	AA	AA	AA	AA	AA	AA	AA	AA	AA	AA	AA	AA	AA	AA	AA	AA	AA
chr3_6811622_A_G	3	6811622	BOT	[T/C]	AA	AA	AA	AA	AA	AA	AA	AA	AA	AA	AA	AA	AA	AA	AA	AA	AA	AA	AA	AA	AA	AA	AA	AA	AA	AA	AA	AA	AA	AA	AA	AA	AA	AA	AA	AA	AA	AA	AA	AA	AA	AA	AA	AA	AA
chr3_6812820_C_T	3	6812820	BOT	[T/C]	BB	BB	BB	BB	BB	BB	BB	BB	BB	BB	BB	BB	BB	BB	BB	BB	BB	BB	BB	BB	BB	BB	BB	BB	BB	BB	BB	BB	BB	BB	BB	BB	BB	BB	BB	BB	BB	BB	BB	BB	BB	BB	BB	BB	BB
cn_T_C_chr3_6847417	3	6847417	TOP	[A/G]	AA	AA	AA	AA	AA	AA	AA	AA	AA	AA	AA	AA	AA	AA	AA	AA	AA	AA	AA	AA	AA	AA	AA	AA	AA	AA	AA	AA	AA	AA	AA	AA	AA	AA	AA	AA	AA	AA	AA	AA	AA	AA	AA	AA	AA
chr3_6857515_G_T	3	6857515	BOT	[T/G]	BB	AA	AB	AA	AB	AA	BB	AB	AA	NC	BB	AB	AB	AB	AB	BB	AB	AB	BB	BB	AB	BB	AB	AB	AA	AB	AA	BB	AB	AB	AB	AB	AA	BB	AB	AB	AB	AB	BB	AA	BB	AB	AB	AB	AA
chr3_6907296_A_G	3	6907296	TOP	[A/G]	AA	AA	AA	AA	AA	AA	AA	AA	AA	AA	AA	AA	AA	AA	AA	AA	AA	AA	AA	AA	AA	AA	AA	AA	AA	AA	AA	AA	AA	AA	AA	AA	AA	AA	AA	AA	AA	AA	AA	AA	AA	AA	AA	AA	AA
be_C_A_chr3_6932339	3	6932339	BOT	[T/G]	BB	BB	BB	BB	BB	BB	BB	BB	BB	BB	BB	BB	BB	BB	BB	BB	BB	BB	BB	BB	BB	BB	BB	BB	BB	BB	BB	BB	BB	BB	BB	BB	BB	BB	BB	BB	BB	BB	BB	BB	BB	BB	BB	BB	BB
ae_G_A_chr3_6983646	3	6983646	BOT	[T/C]	BB	BB	BB	BB	BB	BB	BB	BB	BB	BB	BB	BB	BB	BB	BB	BB	BB	BB	BB	BB	BB	BB	BB	BB	BB	BB	BB	BB	BB	BB	BB	BB	BB	BB	BB	BB	BB	BB	BB	BB	BB	BB	BB	BB	BB
chr3_6987820_A_G	3	6987820	BOT	[T/C]	AA	AA	AA	AA	AA	AA	AA	AA	AA	AA	AA	AA	AA	AA	AA	AA	AA	AA	AA	AA	AA	AA	AA	AA	AA	AA	AA	AA	AA	AA	AA	AA	AA	AA	AA	AA	AA	AA	AA	AA	AA	AA	AA	AA	AA
lb_C_T_chr3_7002253	3	7002253	TOP	[A/G]	BB	BB	BB	BB	BB	BB	BB	BB	BB	BB	BB	BB	BB	BB	BB	BB	BB	BB	BB	BB	BB	BB	BB	BB	BB	BB	BB	BB	BB	BB	BB	BB	BB	BB	BB	BB	BB	BB	BB	BB	BB	BB	BB	BB	BB
chr3_7003964_C_T	3	7003964	BOT	[T/C]	NC	BB	AB	BB	AB	BB	AA	AB	BB	AB	AA	AB	AB	AB	AB	AA	AB	AA	AA	AB	AB	AA	AB	AB	BB	AB	BB	AA	AB	AB	AB	AB	BB	AA	AB	AB	AB	AB	AA	BB	AA	AB	AB	AB	BB
chr3_702832_G_T	3	702832	BOT	[T/G]	AA	AA	AA	AA	AA	AA	AA	AA	AA	AA	AA	AA	AA	AA	AA	AA	AA	AA	AA	AA	AA	AA	AA	AA	AA	AA	AA	AA	AA	AA	AA	AA	AA	AA	AA	AA	AA	AA	AA	AA	AA	AA	AA	AA	AA
chr3_7056491_C_T	3	7056491	TOP	[A/G]	AA	AA	AA	AA	AA	AA	AA	AA	AA	AA	AA	AA	AA	AA	AA	AA	AA	AA	AA	AA	AA	AA	AA	AA	AA	AA	AA	AA	AA	AA	AA	AA	AA	AA	AA	AA	AA	AA	AA	AA	AA	AA	AA	AA	AA
chr3_7068323_A_G	3	7068323	TOP	[A/G]	BB	AA	AB	AA	AB	AA	BB	AB	AA	NC	BB	AB	AB	AB	AB	BB	AB	BB	BB	AB	AB	BB	AB	AB	AA	AB	AA	BB	AB	AB	AB	AB	AA	BB	AB	AB	AB	AB	BB	AA	BB	AB	AB	AB	AA
li_T_C_chr3_7077185	3	7077185	BOT	[T/C]	AA	AA	AA	AA	AA	AA	AA	AA	AA	AA	AA	AA	AA	AA	AA	AA	AA	AA	AA	AA	AA	AA	AA	AA	AA	AA	AA	AA	AA	AA	AA	AA	AA	AA	AA	AA	AA	AA	AA	AA	AA	AA	AA	AA	AA
chr3_7077998_A_G	3	7077998	BOT	[T/C]	AA	AA	AA	AA	AA	AA	AA	AA	AA	AA	AA	AA	AA	AA	AA	AA	AA	AA	AA	AA	AA	AA	AA	AA	AA	AA	AA	AA	AA	AA	AA	AA	AA	AA	AA	AA	AA	AA	AA	AA	AA	AA	AA	AA	AA
chr3_7083442_C_T	3	7083442	TOP	[A/G]	AA	AA	AA	AA	AA	AA	AA	AA	AA	AA	AA	AA	AA	AA	AA	AA	AA	AA	AA	AA	AA	AA	AA	AA	AA	AA	AA	AA	AA	AA	AA	AA	AA	AA	AA	AA	AA	AA	AA	AA	AA	AA	AA	AA	AA
chr3_7105466_A_C	3	7105466	BOT	[T/G]	BB	BB	BB	BB	BB	BB	BB	BB	BB	BB	BB	BB	BB	BB	BB	BB	BB	BB	BB	BB	BB	BB	BB	BB	BB	BB	BB	BB	BB	BB	BB	BB	BB	BB	BB	BB	BB	BB	BB	BB	BB	BB	BB	BB	BB
chr3_7114900_C_T	3	7114900	BOT	[T/C]	BB	BB	BB	BB	BB	BB	BB	BB	BB	BB	BB	BB	BB	BB	BB	BB	BB	BB	BB	BB	BB	BB	BB	BB	BB	BB	BB	BB	BB	BB	BB	BB	BB	BB	BB	BB	BB	BB	BB	BB	BB	BB	BB	BB	BB
chr3_7116858_C_T	3	7116858	TOP	[A/G]	AA	AA	AA	AA	AA	AA	AA	AA	AA	AA	AA	AA	AA	AA	AA	AA	AA	AA	AA	AA	AA	AA	AA	AA	AA	AA	AA	AA	AA	AA	AA	AA	AA	AA	AA	AA	AA	AA	AA	AA	AA	AA	AA	AA	AA
chr3_7129347_C_T	3	7129347	TOP	[A/G]	BB	BB	BB	BB	BB	BB	BB	BB	BB	BB	BB	BB	BB	BB	BB	BB	BB	BB	BB	BB	BB	BB	BB	BB	BB	BB	BB	BB	BB	BB	BB	BB	BB	BB	BB	BB	BB	BB	BB	BB	BB	BB	BB	BB	BB
mu_s_T_G_chr3_712977	3	712977	TOP	[A/C]	AA	AA	AA	AA	AA	AA	AA	AA	AA	AA	AA	AA	AA	AA	AA	AA	AA	AA	AA	AA	AA	AA	AA	AA	AA	AA	AA	AA	AA	AA	AA	AA	AA	AA	AA	AA	AA	AA	AA	AA	AA	AA	AA	AA	AA
mu_o_A_G_chr3_713967	3	713967	TOP	[A/G]	AA	AA	AA	AA	AA	AA	AA	AA	AA	AA	AA	AA	AA	AA	AA	AA	AA	AA	AA	AA	AA	AA	AA	AA	AA	AA	AA	AA	AA	AA	AA	AA	AA	AA	AA	AA	AA	AA	AA	AA	AA	AA	AA	AA	AA
be_G_A_chr3_714739	3	714739	TOP	[A/G]	BB	BB	BB	BB	BB	BB	BB	BB	BB	BB	BB	BB	BB	BB	BB	BB	BB	BB	BB	BB	BB	BB	BB	BB	BB	BB	BB	BB	BB	BB	BB	BB	BB	BB	BB	BB	BB	BB	BB	BB	BB	BB	BB	BB	BB
chr3_7157449_A_G	3	7157449	BOT	[T/C]	BB	BB	BB	BB	BB	BB	BB	BB	BB	BB	BB	BB	BB	BB	BB	BB	BB	BB	BB	BB	BB	BB	BB	BB	BB	BB	BB	BB	BB	BB	BB	BB	BB	BB	BB	BB	BB	BB	BB	BB	BB	BB	BB	BB	BB
ae_G_A_chr3_715797	3	715797	BOT	[T/C]	BB	BB	BB	BB	BB	BB	BB	BB	BB	BB	BB	BB	BB	BB	BB	BB	BB	BB	BB	BB	BB	BB	BB	BB	BB	BB	BB	BB	BB	BB	BB	BB	BB	BB	BB	BB	BB	BB	BB	BB	BB	BB	BB	BB	BB
chr3_7169249_A_G	3	7169249	TOP	[A/G]	BB	AA	AB	AA	AB	AA	BB	AB	AA	AB	BB	AB	AB	AB	AB	BB	AB	BB	BB	AB	AB	BB	AB	AB	AA	AB	AA	BB	AB	AB	AB	AB	AA	BB	AB	AB	AB	AB	BB	AA	BB	AB	AB	AB	AA
chr3_7177650_C_T	3	7177650	BOT	[T/C]	AA	AA	AA	AA	AA	AA	AA	AA	AA	AA	AA	AA	AA	AA	AA	AA	AA	AA	AA	AA	AA	AA	AA	AA	AA	AA	AA	AA	AA	AA	AA	AA	AA	AA	AA	AA	AA	AA	AA	AA	AA	AA	AA	AA	AA
chr3_720644_C_T	3	720644	TOP	[A/G]	AA	AB	AB	AB	AB	AB	AA	AB	AB	AB	AA	AB	AB	AB	AB	AB	AA	BB	AA	AA	AB	AA	AB	AB	BB	AB	AB	AA	AB	AB	AA	NC	AB	AA	AB	AB	AB	AA	AA	AB	AA	BB	BB	AB	BB
chr3_7223431_A_G	3	7223431	BOT	[T/C]	BB	AA	AB	AA	AB	AA	BB	AB	AA	AB	BB	AB	AB	AB	AB	BB	AB	BB	BB	AB	AB	BB	AB	AB	AA	AB	AA	BB	AB	AB	AB	AB	AA	BB	AB	AB	AB	AB	BB	AA	BB	AB	AB	AB	AA
chr3_7223618_C_T	3	7223618	TOP	[A/G]	NC	BB	AB	BB	AB	BB	AA	AB	BB	AB	AA	AB	AB	AB	AB	AA	AB	AA	AA	AB	AB	AA	AB	AB	BB	AB	BB	AA	AB	AB	AB	AB	BB	AA	AB	AB	AB	AB	AA	BB	AA	AB	AB	AB	BB
chr3_7236898_C_T	3	7236898	BOT	[T/C]	BB	AA	AB	AA	AB	AA	BB	AB	AA	AB	BB	AB	AB	AB	AB	BB	AB	BB	BB	AB	AB	BB	AB	AB	AA	AB	AA	BB	AB	AB	AB	AB	AA	BB	AB	AB	AB	AB	BB	AA	BB	AB	AB	AB	AA
chr3_724399_C_T	3	724399	BOT	[T/C]	BB	BB	BB	BB	BB	BB	BB	BB	BB	BB	BB	BB	BB	BB	BB	BB	BB	BB	BB	BB	BB	BB	BB	BB	BB	BB	BB	BB	BB	BB	BB	BB	BB	BB	BB	BB	BB	BB	BB	BB	BB	BB	BB	BB	BB
lb_G_A_chr3_725099	3	725099	TOP	[A/G]	BB	AB	AB	AB	AB	AB	BB	AB	AB	AB	BB	AB	AB	AB	AB	AB	BB	AA	BB	BB	AB	BB	AB	AB	AA	AB	AB	BB	AB	AB	BB	NC	AB	BB	AB	AB	AB	BB	BB	AB	BB	AA	AA	AB	AA
chr3_7295874_C_T	3	7295874	BOT	[T/C]	BB	BB	BB	BB	BB	BB	BB	BB	BB	BB	BB	BB	BB	BB	BB	BB	BB	BB	BB	BB	BB	BB	BB	BB	BB	BB	BB	BB	BB	BB	BB	BB	BB	BB	BB	BB	BB	BB	BB	BB	BB	BB	BB	BB	BB
chr3_7321251_A_G	3	7321251	TOP	[A/G]	BB	BB	BB	BB	BB	BB	BB	BB	BB	BB	BB	BB	BB	BB	BB	BB	BB	BB	BB	BB	BB	BB	BB	BB	BB	BB	BB	BB	BB	BB	BB	BB	BB	BB	BB	BB	BB	BB	BB	BB	BB	BB	BB	BB	BB
chr3_7321451_A_C	3	7321451	BOT	[T/G]	BB	BB	BB	BB	BB	BB	BB	BB	BB	BB	BB	BB	BB	BB	BB	BB	BB	BB	BB	BB	BB	BB	BB	BB	BB	BB	BB	BB	BB	BB	BB	BB	BB	BB	BB	BB	BB	BB	BB	BB	BB	BB	BB	BB	BB
cn_T_C_chr3_7325304	3	7325304	BOT	[T/C]	AA	AA	AA	AA	AA	AA	AA	AA	AA	AA	AA	AA	AA	AA	AA	AA	AA	AA	AA	AA	AA	AA	AA	AA	AA	AA	AA	AA	AA	AA	AA	AA	AA	AA	AA	AA	AA	AA	AA	AA	AA	AA	AA	AA	AA
mu_o_T_C_chr3_7327039	3	7327039	TOP	[A/G]	AA	AA	AA	AA	AA	AA	AA	AA	AA	AA	AA	AA	AA	AA	AA	AA	AA	AA	AA	AA	AA	AA	AA	AA	AA	AA	AA	AA	AA	AA	AA	AA	AA	AA	AA	AA	AA	AA	AA	AA	AA	AA	AA	AA	AA
chr3_7344716_A_G	3	7344716	BOT	[T/C]	BB	BB	BB	BB	BB	BB	BB	BB	BB	BB	BB	BB	BB	BB	BB	BB	BB	BB	BB	BB	BB	BB	BB	BB	BB	BB	BB	BB	BB	BB	BB	BB	BB	BB	BB	BB	BB	BB	BB	BB	BB	BB	BB	BB	BB
chr3_7356750_A_C	3	7356750	BOT	[T/G]	AA	AA	AA	AA	AA	AA	AA	AA	AA	AA	AA	AA	AA	AA	AA	AA	AA	AA	AA	AA	AA	AA	AA	AA	AA	AA	AA	AA	AA	AA	AA	NC	AA	AA	AA	AA	AA	AA	AA	AA	AA	AA	AA	AA	AA
chr3_7387881_A_C	3	7387881	TOP	[A/C]	AA	AA	AA	AA	AA	AA	AA	AA	AA	AA	AA	AA	AA	AA	AA	AA	AA	AA	AA	AA	AA	AA	AA	AA	AA	AA	AA	AA	AA	AA	AA	AA	AA	AA	AA	AA	AA	AA	AA	AA	AA	AA	AA	AA	AA
be_G_A_chr3_7388965	3	7388965	TOP	[A/G]	BB	BB	BB	BB	BB	BB	BB	BB	BB	BB	BB	BB	BB	BB	BB	BB	BB	BB	BB	BB	BB	BB	BB	BB	BB	BB	BB	BB	BB	BB	BB	BB	BB	BB	BB	BB	BB	BB	BB	BB	BB	BB	BB	BB	BB
chr3_7441660_A_G	3	7441660	TOP	[A/G]	NC	BB	AB	BB	AB	BB	AA	AB	BB	AB	AA	AB	AB	AB	AB	AA	AB	AA	AB	AB	AB	AA	AB	AB	BB	AB	BB	AA	AB	AB	AB	AB	BB	AA	AB	AB	AB	AB	AA	BB	AA	AB	AB	AB	BB
chr3_7468704_A_C	3	7468704	TOP	[A/C]	BB	BB	BB	BB	BB	BB	BB	BB	BB	BB	BB	BB	BB	BB	BB	BB	BB	BB	BB	BB	BB	BB	BB	BB	BB	BB	BB	BB	BB	BB	BB	BB	BB	BB	BB	BB	BB	BB	BB	BB	BB	BB	BB	BB	BB
chr3_7470797_C_T	3	7470797	BOT	[T/C]	BB	BB	BB	BB	BB	BB	BB	BB	BB	BB	BB	BB	BB	BB	BB	BB	BB	BB	BB	BB	BB	BB	BB	BB	BB	BB	BB	BB	BB	BB	BB	BB	BB	BB	BB	BB	BB	BB	BB	BB	BB	BB	BB	BB	BB
chr3_7472539_C_T	3	7472539	TOP	[A/G]	BB	AA	AB	AA	AB	AA	BB	AB	AA	AB	BB	AB	AB	AB	AB	BB	AB	BB	AB	AB	AB	BB	AB	AB	AA	AB	AA	BB	AB	AB	AB	AB	AA	BB	AB	AB	AB	AB	BB	AA	BB	AB	AB	AB	AA
lb_T_C_chr3_7486446	3	7486446	TOP	[A/G]	AA	AA	AA	AA	AA	AA	AA	AA	AA	AA	AA	AA	AA	AA	AA	AA	AA	AA	AA	AA	AA	AA	AA	AA	AA	AA	AA	AA	AA	AA	AA	AA	AA	AA	AA	AA	AA	AA	AA	AA	AA	AA	AA	AA	AA
chr3_7515038_A_G	3	7515038	BOT	[T/C]	BB	BB	BB	BB	BB	BB	BB	BB	BB	BB	BB	BB	BB	BB	BB	BB	BB	BB	BB	BB	BB	BB	BB	BB	BB	BB	BB	BB	BB	BB	BB	BB	BB	BB	BB	BB	BB	BB	BB	BB	BB	BB	BB	BB	BB
chr3_7521147_A_G	3	7521147	BOT	[T/C]	AA	AA	AA	AA	AA	AA	AA	AA	AA	AA	AA	AA	AA	AA	AA	AA	AA	AA	AA	AA	AA	AA	AA	AA	AA	AA	AA	AA	AA	AA	AA	AA	AA	AA	AA	AA	AA	AA	AA	AA	AA	AA	AA	AA	AA
chr3_753960_C_T	3	753960	BOT	[T/C]	BB	BB	BB	BB	BB	BB	BB	BB	BB	BB	BB	BB	BB	BB	BB	BB	BB	BB	BB	BB	BB	BB	BB	BB	BB	BB	BB	BB	BB	BB	BB	BB	BB	BB	BB	BB	BB	BB	BB	BB	BB	BB	BB	BB	BB
chr3_755127_A_G	3	755127	TOP	[A/G]	BB	BB	BB	BB	BB	BB	BB	BB	BB	BB	BB	BB	BB	BB	BB	BB	BB	BB	BB	BB	BB	BB	BB	BB	BB	BB	BB	BB	BB	BB	BB	BB	BB	BB	BB	BB	BB	BB	BB	BB	BB	BB	BB	BB	BB
chr3_7557487_C_T	3	7557487	BOT	[T/C]	AA	AA	AA	AA	AA	AA	AA	AA	AA	AA	AA	AA	AA	AA	AA	AA	AA	AA	AA	AA	AA	AA	AA	AA	AA	AA	AA	AA	AA	AA	AA	AA	AA	AA	AA	AA	AA	AA	AA	AA	AA	AA	AA	AA	AA
chr3_7564141_A_G	3	7564141	TOP	[A/G]	BB	AA	AB	AA	AB	AA	BB	AB	AA	AB	BB	AB	AB	AB	AB	BB	AB	BB	AB	AB	AB	BB	AB	AB	AA	AB	AA	BB	AB	AB	AB	AB	AA	BB	AB	AB	AB	AB	BB	AA	BB	AB	AB	AB	AA
chr3_757149_A_G	3	757149	BOT	[T/C]	AA	AA	AA	AA	AA	AA	AA	AA	AA	AA	AA	AA	AA	AA	AA	AA	AA	AA	AA	AA	AA	AA	AA	AA	AA	AA	AA	AA	AA	AA	AA	AA	AA	AA	AA	AA	AA	AA	AA	AA	AA	AA	AA	AA	AA
chr3_7581783_A_C	3	7581783	BOT	[T/G]	BB	BB	BB	BB	BB	BB	BB	BB	BB	BB	BB	BB	BB	BB	BB	BB	BB	BB	BB	BB	BB	BB	BB	BB	BB	BB	BB	BB	BB	BB	BB	BB	BB	BB	BB	BB	BB	BB	BB	BB	BB	BB	BB	BB	BB
chr3_7602831_G_T	3	7602831	BOT	[T/G]	BB	BB	BB	BB	BB	BB	BB	BB	BB	BB	BB	BB	BB	BB	BB	BB	BB	BB	BB	BB	BB	BB	BB	BB	BB	BB	BB	BB	BB	BB	BB	BB	BB	BB	BB	BB	BB	BB	BB	BB	BB	BB	BB	BB	BB
chr3_7602978_A_G	3	7602978	BOT	[T/C]	AA	AA	AA	AA	AA	AA	AA	AA	AA	AA	AA	AA	AA	AA	AA	AA	AA	AA	AA	AA	AA	AA	AA	AA	AA	AA	AA	AA	AA	AA	AA	AA	AA	AA	AA	AA	AA	AA	AA	AA	AA	AA	AA	AA	AA
chr3_7663630_C_T	3	7663630	BOT	[T/C]	NC	BB	AB	BB	AB	BB	AA	AB	BB	NC	AA	AB	AB	AB	BB	AA	AB	AA	AB	AB	AB	AA	AB	AB	BB	AB	BB	AA	AB	AB	AB	AB	BB	AA	AB	AB	AB	AB	AA	BB	AA	AB	AB	AB	BB
chr3_7699740_C_T	3	7699740	BOT	[T/C]	AA	AA	AA	AA	AA	AA	AA	AA	AA	AA	AA	AA	AA	AA	AA	AA	AA	AA	AA	AA	AA	AA	AA	AA	AA	AA	AA	AA	AA	AA	AA	AA	AA	AA	AA	AA	AA	AA	AA	AA	AA	AA	AA	AA	AA
chr3_7713842_C_T	3	7713842	TOP	[A/G]	BB	BB	BB	BB	BB	BB	NC	BB	BB	BB	NC	BB	BB	BB	BB	NC	BB	NC	BB	BB	BB	NC	BB	BB	BB	BB	BB	NC	BB	BB	BB	BB	BB	NC	BB	BB	BB	BB	NC	BB	NC	BB	BB	BB	BB
chr3_7714564_A_G	3	7714564	BOT	[T/C]	NC	AA	AA	AA	AB	AA	BB	AB	AA	AB	BB	AB	AB	AB	AA	BB	AB	BB	AB	AB	AB	BB	AB	AB	AA	AB	AA	BB	AB	AB	AB	AB	AA	BB	AB	AB	AB	AB	BB	AA	BB	AB	AB	AB	AA
cn_T_G_chr3_777612	3	777612	BOT	[T/G]	AA	AA	AA	AA	AA	AA	AA	AA	AA	AA	AA	AA	AA	AA	AA	AA	AA	AA	AA	AA	AA	AA	AA	AA	AA	AA	AA	AA	AA	AA	AA	AA	AA	AA	AA	AA	AA	AA	AA	AA	AA	AA	AA	AA	AA
chr3_78057_A_G	3	78057	TOP	[A/G]	AA	AA	AA	AA	AA	AA	AA	AA	AA	AA	AA	AA	AA	AA	AA	AA	AA	AA	AA	AA	AA	AA	AA	AA	AA	AA	AA	AA	AA	AA	AA	AA	AA	AA	AA	AA	AA	AA	AA	AA	AA	AA	AA	AA	AA
be_G_A_chr3_7837707	3	7837707	BOT	[T/C]	BB	BB	BB	BB	BB	BB	BB	BB	BB	BB	BB	BB	BB	BB	BB	BB	BB	BB	BB	BB	BB	BB	BB	BB	BB	BB	BB	BB	BB	BB	BB	BB	BB	BB	BB	BB	BB	BB	BB	BB	BB	BB	BB	BB	BB
chr3_78728_A_C	3	78728	BOT	[T/G]	BB	BB	BB	BB	BB	BB	BB	BB	BB	BB	BB	BB	BB	BB	BB	BB	BB	BB	BB	BB	BB	BB	BB	BB	BB	BB	BB	BB	BB	BB	BB	BB	BB	BB	BB	BB	BB	BB	BB	BB	BB	BB	BB	BB	BB
ae_G_A_chr3_7935347	3	7935347	BOT	[T/C]	BB	BB	BB	BB	BB	BB	BB	BB	BB	BB	BB	BB	BB	BB	BB	BB	BB	BB	BB	BB	BB	BB	BB	BB	BB	BB	BB	BB	BB	BB	BB	BB	BB	BB	BB	BB	BB	BB	BB	BB	BB	BB	BB	BB	BB
lb_A_G_chr3_7960621	3	7960621	BOT	[T/C]	AA	AA	AA	AA	AA	AA	AA	AA	AA	AA	AA	AA	AA	AA	AA	AA	AA	AA	AA	AA	AA	AA	AA	AA	AA	AA	AA	AA	AA	AA	AA	AA	AA	AA	AA	AA	AA	AA	AA	AA	AA	AA	AA	AA	AA
chr3_8254703_A_G	3	8254703	BOT	[T/C]	AA	AA	AA	AA	AA	AA	AA	AA	AA	AA	AA	AA	AA	AA	AA	AA	AA	AA	AA	AA	AA	AA	AA	AA	AA	AA	AA	AA	AA	AA	AA	NC	AA	AA	AA	AA	AA	AA	AA	AA	AA	AA	AA	AA	AA
chr3_8257244_C_T	3	8257244	TOP	[A/G]	BB	BB	BB	BB	BB	BB	BB	BB	BB	BB	BB	BB	BB	BB	BB	BB	BB	BB	BB	BB	BB	BB	BB	BB	BB	BB	BB	BB	BB	BB	BB	BB	BB	BB	BB	BB	BB	BB	BB	BB	BB	BB	BB	BB	BB
chr3_8261333_C_T	3	8261333	BOT	[T/C]	AA	BB	BB	BB	AB	BB	AA	AB	BB	AB	AA	AB	AB	AB	BB	AA	AB	AA	AB	AB	AB	AA	AB	AB	BB	AB	BB	AA	BB	AB	AB	AB	BB	AA	AB	AB	AB	AB	AA	BB	AA	AB	AB	AB	BB
cn_C_A_chr3_8345287	3	8345287	BOT	[T/G]	AA	AA	AA	AA	AA	AA	AA	AA	AA	AA	AA	AA	AA	AA	AA	AA	AA	AA	AA	AA	AA	AA	AA	AA	AA	AA	AA	AA	AA	AA	AA	AA	AA	AA	AA	AA	AA	AA	AA	AA	AA	AA	AA	AA	AA
be_C_T_chr3_8407819	3	8407819	TOP	[A/G]	BB	BB	BB	BB	BB	BB	BB	BB	BB	BB	BB	BB	BB	BB	BB	BB	BB	BB	BB	BB	BB	BB	BB	BB	BB	BB	BB	BB	BB	BB	BB	BB	BB	BB	BB	BB	BB	BB	BB	BB	BB	BB	BB	BB	BB
ae_C_T_chr3_8428695	3	8428695	TOP	[A/G]	BB	BB	BB	BB	BB	BB	BB	BB	BB	BB	BB	BB	BB	BB	BB	BB	BB	BB	BB	BB	BB	BB	BB	BB	BB	BB	BB	BB	BB	BB	BB	BB	BB	BB	BB	BB	BB	BB	BB	BB	BB	BB	BB	BB	BB
lb_G_T_chr3_8464433	3	8464433	BOT	[T/G]	BB	BB	BB	BB	BB	BB	BB	BB	BB	BB	BB	BB	BB	BB	BB	BB	BB	BB	BB	BB	BB	BB	BB	BB	BB	BB	BB	BB	BB	BB	BB	BB	BB	BB	BB	BB	BB	BB	BB	BB	BB	BB	BB	BB	BB
chr3_8487675_A_C	3	8487675	BOT	[T/G]	BB	BB	BB	BB	BB	BB	BB	BB	BB	BB	BB	BB	BB	BB	BB	BB	BB	BB	BB	BB	BB	BB	BB	BB	BB	BB	BB	BB	BB	BB	BB	BB	BB	BB	BB	BB	BB	BB	BB	BB	BB	BB	BB	BB	BB
chr3_8490674_A_C	3	8490674	BOT	[T/G]	BB	BB	BB	BB	BB	BB	BB	BB	BB	BB	BB	BB	BB	BB	BB	BB	BB	BB	BB	BB	BB	BB	BB	BB	BB	BB	BB	BB	BB	BB	BB	BB	BB	BB	BB	BB	BB	BB	BB	BB	BB	BB	BB	BB	BB
chr3_8507666_A_G	3	8507666	TOP	[A/G]	AA	AA	AA	AA	AA	AA	AA	AA	AA	AA	AA	AA	AA	AA	AA	AA	AA	AA	AA	AA	AA	AA	AA	AA	AA	AA	AA	AA	AA	AA	AA	AA	AA	AA	AA	AA	AA	AA	AA	AA	AA	AA	AA	AA	AA
chr3_8513977_C_T	3	8513977	BOT	[T/C]	AA	AA	AA	AA	AA	AA	AA	AA	AA	AA	AA	AA	AA	AA	AA	AA	AA	AA	AA	AA	AA	AA	AA	AA	AA	AA	AA	AA	AA	AA	AA	AA	AA	AA	AA	AA	AA	AA	AA	AA	AA	AA	AA	AA	AA
chr3_8534531_A_G	3	8534531	BOT	[T/C]	BB	BB	BB	BB	BB	BB	BB	BB	BB	BB	BB	BB	BB	BB	BB	BB	BB	BB	BB	BB	BB	BB	BB	BB	BB	BB	BB	BB	BB	BB	BB	BB	BB	BB	BB	BB	BB	BB	BB	BB	BB	BB	BB	BB	BB
chr3_8560755_A_G	3	8560755	TOP	[A/G]	BB	BB	BB	BB	BB	BB	BB	BB	BB	BB	BB	BB	BB	BB	BB	BB	BB	BB	BB	BB	BB	BB	BB	BB	BB	BB	BB	BB	BB	BB	BB	BB	BB	BB	BB	BB	BB	BB	BB	BB	BB	BB	BB	BB	BB
chr3_8560917_C_T	3	8560917	TOP	[A/G]	AA	AA	AA	AA	AA	AA	AA	AA	AA	AA	AA	AA	AA	AA	AA	AA	AA	AA	AA	AA	AA	AA	AA	AA	AA	AA	AA	AA	AA	AA	AA	AA	AA	AA	AA	AA	AA	AA	AA	AA	AA	AA	AA	AA	AA
chr3_8585080_A_C	3	8585080	BOT	[T/G]	AA	AA	AA	AA	AA	AA	AA	AA	AA	AA	AA	AA	AA	AA	AA	AA	AA	AA	AA	AA	AA	AA	AA	AA	AA	AA	AA	AA	AA	AA	AA	AA	AA	AA	AA	AA	AA	AA	AA	AA	AA	AA	AA	AA	AA
chr3_8613819_C_T	3	8613819	BOT	[T/C]	BB	BB	BB	BB	BB	BB	BB	BB	BB	BB	BB	BB	BB	BB	BB	BB	BB	BB	BB	BB	BB	BB	BB	BB	BB	BB	BB	BB	BB	BB	BB	BB	BB	BB	BB	BB	BB	BB	BB	BB	BB	BB	BB	BB	BB
chr3_862634_C_T	3	862634	TOP	[A/G]	AA	AA	AA	AA	AA	AA	AA	AA	AA	AA	AA	AA	AA	AA	AA	AA	AA	AA	AA	AA	AA	AA	AA	AA	AA	AA	AA	AA	AA	AA	AA	AA	AA	AA	AA	AA	AA	AA	AA	AA	AA	AA	AA	AA	AA
chr3_8653220_C_T	3	8653220	BOT	[T/C]	AA	AA	AA	AA	AA	AA	AA	AA	AA	AA	AA	AA	AA	AA	AA	AA	AA	AA	AA	AA	AA	AA	AA	AA	AA	AA	AA	AA	AA	AA	AA	AA	AA	AA	AA	AA	AA	AA	AA	AA	AA	AA	AA	AA	AA
chr3_8663064_C_T	3	8663064	TOP	[A/G]	BB	BB	BB	BB	BB	BB	BB	BB	BB	BB	BB	BB	BB	BB	BB	BB	BB	BB	BB	BB	BB	BB	BB	BB	BB	BB	BB	BB	BB	BB	BB	BB	BB	BB	BB	BB	BB	BB	BB	BB	BB	BB	BB	BB	BB
chr3_8670592_C_T	3	8670592	TOP	[A/G]	BB	BB	BB	BB	BB	BB	BB	BB	BB	BB	BB	BB	BB	BB	BB	BB	BB	BB	BB	BB	BB	BB	BB	BB	BB	BB	BB	BB	BB	BB	BB	BB	BB	BB	BB	BB	BB	BB	BB	BB	BB	BB	BB	BB	BB
chr3_8686024_A_G	3	8686024	TOP	[A/G]	BB	BB	BB	BB	BB	BB	BB	BB	BB	BB	BB	BB	BB	BB	BB	BB	BB	BB	BB	BB	BB	BB	BB	BB	BB	BB	BB	BB	BB	BB	BB	BB	BB	BB	BB	BB	BB	BB	BB	BB	BB	BB	BB	BB	BB
chr3_8781448_A_G	3	8781448	TOP	[A/G]	AA	AA	AA	AA	AA	AA	AA	AA	AA	AA	AA	AA	AA	AA	AA	AA	AA	AA	AA	AA	AA	AA	AA	AA	AA	AA	AA	AA	AA	AA	AA	AA	AA	AA	AA	AA	AA	AA	AA	AA	AA	AA	AA	AA	AA
chr3_8787959_A_G	3	8787959	BOT	[T/C]	BB	BB	BB	BB	BB	BB	BB	BB	BB	BB	BB	BB	BB	BB	BB	BB	BB	BB	BB	BB	BB	BB	BB	BB	BB	BB	BB	BB	BB	BB	BB	BB	BB	BB	BB	BB	BB	BB	BB	BB	BB	BB	BB	BB	BB
chr3_8818908_C_T	3	8818908	BOT	[T/C]	BB	BB	BB	BB	BB	BB	BB	BB	BB	BB	BB	BB	BB	BB	BB	BB	BB	BB	BB	BB	BB	BB	BB	BB	BB	BB	BB	BB	BB	BB	BB	BB	BB	BB	BB	BB	BB	BB	BB	BB	BB	BB	BB	BB	BB
chr3_882419_A_G	3	882419	TOP	[A/G]	BB	BB	BB	BB	BB	BB	BB	BB	BB	BB	BB	BB	BB	BB	BB	BB	BB	BB	BB	BB	BB	BB	BB	BB	BB	BB	BB	BB	BB	BB	BB	BB	BB	BB	BB	BB	BB	BB	BB	BB	BB	BB	BB	BB	BB
chr3_8827121_A_G	3	8827121	TOP	[A/G]	AA	AA	AA	AA	AA	AA	AA	AA	AA	AA	AA	AA	AA	AA	AA	AA	AA	AA	AA	AA	AA	AA	AA	AA	AA	AA	AA	AA	AA	AA	AA	AA	AA	AA	AA	AA	AA	AA	AA	AA	AA	AA	AA	AA	AA
be_T_C_chr3_8876215	3	8876215	BOT	[T/C]	AA	AA	AA	AA	AA	AA	AA	AA	AA	AA	AA	AA	AA	AA	AA	AA	AA	AA	AA	AA	AA	AA	AA	AA	AA	AA	AA	AA	AA	AA	AA	AA	AA	AA	AA	AA	AA	AA	AA	AA	AA	AA	AA	AA	AA
chr3_890554_A_G	3	890554	TOP	[A/G]	BB	BB	BB	BB	BB	BB	BB	BB	BB	BB	BB	BB	BB	BB	BB	BB	BB	BB	BB	BB	BB	BB	BB	BB	BB	BB	BB	BB	BB	BB	BB	BB	BB	BB	BB	BB	BB	BB	BB	BB	BB	BB	BB	BB	BB
lb_A_C_chr3_8960136	3	8960136	TOP	[A/C]	AA	AA	AA	AA	AA	AA	AA	AA	AA	AA	AA	AA	AA	AA	AA	AA	AA	AA	AA	AA	AA	AA	AA	AA	AA	AA	AA	AA	AA	AA	AA	AA	AA	AA	AA	AA	AA	AA	AA	AA	AA	AA	AA	AA	AA
chr3_9163654_A_C	3	9163654	TOP	[A/C]	AA	AA	AA	AA	AA	AA	AA	AA	AA	AA	AA	AA	AA	AA	AA	AA	AA	AA	AA	AA	AA	AA	AA	AA	AA	AA	AA	AA	AA	AA	AA	AA	AA	AA	AA	AA	AA	AA	AA	AA	AA	AA	AA	AA	AA
chr3_9168917_G_T	3	9168917	TOP	[A/C]	BB	BB	BB	BB	BB	BB	BB	BB	BB	BB	BB	BB	BB	BB	BB	BB	BB	BB	BB	BB	BB	BB	BB	BB	BB	BB	BB	BB	BB	BB	BB	BB	BB	BB	BB	BB	BB	BB	BB	BB	BB	BB	BB	BB	BB
chr3_91970_G_T	3	91970	BOT	[T/G]	BB	BB	BB	BB	BB	BB	BB	BB	BB	BB	BB	BB	BB	BB	BB	BB	BB	BB	BB	BB	BB	BB	BB	BB	BB	BB	BB	BB	BB	BB	BB	BB	BB	BB	BB	BB	BB	BB	BB	BB	BB	BB	BB	BB	BB
cn_C_T_chr3_9213436	3	9213436	TOP	[A/G]	BB	BB	BB	BB	BB	BB	BB	BB	BB	BB	BB	BB	BB	BB	BB	BB	BB	BB	BB	BB	BB	BB	BB	BB	BB	BB	BB	BB	BB	BB	BB	BB	BB	BB	BB	BB	BB	BB	BB	BB	BB	BB	BB	BB	BB
chr3_9218016_A_G	3	9218016	TOP	[A/G]	BB	AA	AA	AA	AB	AA	AB	AB	AA	AB	BB	AB	AB	AB	AA	BB	AB	BB	AB	AB	AB	BB	AB	AB	AA	AB	AA	BB	AA	AB	AB	AB	AA	AB	AB	AB	AB	AB	BB	AA	BB	AB	AB	AB	AA
chr3_921819_A_G	3	921819	TOP	[A/G]	BB	AB	AB	AB	AB	AB	BB	AB	AB	AB	BB	AB	AB	AB	AB	AB	BB	AA	BB	BB	AB	BB	AB	BB	AA	AB	AB	BB	AB	AB	BB	NC	AB	BB	AB	AB	AB	BB	BB	AB	BB	AA	AA	AB	AA
chr3_9311802_A_G	3	9311802	TOP	[A/G]	BB	BB	BB	BB	BB	BB	BB	BB	BB	BB	BB	BB	BB	BB	BB	BB	BB	BB	BB	BB	BB	BB	BB	BB	BB	BB	BB	BB	BB	BB	BB	BB	BB	BB	BB	BB	BB	BB	BB	BB	BB	BB	BB	BB	BB
chr3_9313244_A_C	3	9313244	BOT	[T/G]	AA	BB	BB	BB	AB	BB	AB	AB	BB	AB	AA	AB	AB	AB	BB	AA	AB	AA	AB	AB	AB	AA	AB	AB	BB	AB	BB	AA	BB	AB	AB	AB	BB	AB	AB	AB	AB	AB	AA	BB	AA	AB	AB	AB	BB
be_T_C_chr3_9340434	3	9340434	BOT	[T/C]	AA	AA	AA	AA	AA	AA	AA	AA	AA	AA	AA	AA	AA	AA	AA	AA	AA	AA	AA	AA	AA	AA	AA	AA	AA	AA	AA	AA	AA	AA	AA	AA	AA	AA	AA	AA	AA	AA	AA	AA	AA	AA	AA	AA	AA
ae_A_G_chr3_9412258	3	9412258	BOT	[T/C]	AA	AA	AA	AA	AA	AA	AA	AA	AA	AA	AA	AA	AA	AA	AA	AA	AA	AA	AA	AA	AA	AA	AA	AA	AA	AA	AA	AA	AA	AA	AA	AA	AA	AA	AA	AA	AA	AA	AA	AA	AA	AA	AA	AA	AA
chr3_9412542_A_G	3	9412542	TOP	[A/G]	AA	BB	BB	BB	AB	BB	AB	AB	BB	NC	AA	AB	AB	AB	BB	AA	AB	AA	AB	AB	AB	AA	AB	AB	BB	AB	BB	AA	BB	AB	AB	AB	BB	AB	AB	AB	AB	AB	AA	BB	AA	AB	AB	AB	BB
lb_G_A_chr3_9414759	3	9414759	TOP	[A/G]	AA	AA	AA	AA	AA	AA	AA	AA	AA	AA	AA	AA	AA	AA	AA	AA	AA	AA	AA	AA	AA	AA	AA	AA	AA	AA	AA	AA	AA	AA	AA	AA	AA	AA	AA	AA	AA	AA	AA	AA	AA	AA	AA	AA	AA
chr3_9422531_G_T	3	9422531	TOP	[A/C]	BB	BB	BB	BB	BB	BB	BB	BB	BB	BB	BB	BB	BB	BB	BB	BB	BB	BB	BB	BB	BB	BB	BB	BB	BB	BB	BB	BB	BB	BB	BB	BB	BB	BB	BB	BB	BB	BB	BB	BB	BB	BB	BB	BB	BB
chr3_9430388_A_C	3	9430388	TOP	[A/C]	AA	AA	AA	AA	AA	AA	AA	AA	AA	AA	AA	AA	AA	AA	AA	AA	AA	AA	AA	AA	AA	AA	AA	AA	AA	AA	AA	AA	AA	AA	AA	AA	AA	AA	AA	AA	AA	AA	AA	AA	AA	AA	AA	AA	AA
chr3_9442034_G_T	3	9442034	BOT	[T/G]	AA	BB	BB	BB	AB	BB	AB	AB	BB	NC	AA	AB	AB	AB	BB	AA	AB	AA	AB	AB	AB	AA	AB	AB	BB	AB	BB	AA	BB	AB	AB	AB	BB	AB	AB	AB	AB	AB	AA	BB	AA	AB	AB	AB	BB
chr3_9523559_C_T	3	9523559	BOT	[T/C]	BB	AA	AA	AA	AB	AA	AB	AB	AA	NC	BB	AB	AB	AB	AA	BB	AB	BB	AB	AB	AB	BB	AB	AB	AA	AB	AA	BB	AA	AB	AB	AB	AA	AB	AB	AB	AB	AB	BB	AA	BB	AB	AB	AB	AA
chr3_9524678_G_T	3	9524678	BOT	[T/G]	AA	AA	AA	AA	AA	AA	AA	AA	AA	AA	AA	AA	AA	AA	AA	AA	AA	AA	AA	AA	AA	AA	AA	AA	AA	AA	AA	AA	AA	AA	AA	AA	AA	AA	AA	AA	AA	AA	AA	AA	AA	AA	AA	AA	AA
chr3_9541810_A_G	3	9541810	TOP	[A/G]	BB	BB	BB	BB	BB	BB	BB	BB	BB	BB	BB	BB	BB	BB	BB	BB	BB	BB	BB	BB	BB	BB	BB	BB	BB	BB	BB	BB	BB	BB	BB	BB	BB	BB	BB	BB	BB	BB	BB	BB	BB	BB	BB	BB	BB
chr3_9561036_G_T	3	9561036	BOT	[T/G]	BB	BB	BB	BB	BB	BB	BB	BB	BB	BB	BB	BB	BB	BB	BB	BB	BB	BB	BB	BB	BB	BB	BB	BB	BB	BB	BB	BB	BB	BB	BB	BB	BB	BB	BB	BB	BB	BB	BB	BB	BB	BB	BB	BB	BB
li_A_G_chr3_9595873	3	9595873	BOT	[T/C]	AA	AA	AA	AA	AA	AA	AA	AA	AA	AA	AA	AA	AA	AA	AA	AA	AA	AA	AA	AA	AA	AA	AA	AA	AA	AA	AA	AA	AA	AA	AA	AA	AA	AA	AA	AA	AA	AA	AA	AA	AA	AA	AA	AA	AA
chr3_9595874_A_G	3	9595874	BOT	[T/C]	BB	BB	BB	BB	BB	BB	BB	BB	BB	BB	BB	BB	BB	BB	BB	BB	BB	BB	BB	BB	BB	BB	BB	BB	BB	BB	BB	BB	BB	BB	BB	BB	BB	BB	BB	BB	BB	BB	BB	BB	BB	BB	BB	BB	BB
chr3_9609135_A_G	3	9609135	TOP	[A/G]	BB	BB	BB	BB	BB	BB	BB	BB	BB	BB	BB	BB	BB	BB	BB	BB	BB	BB	BB	BB	BB	BB	BB	BB	BB	BB	BB	BB	BB	BB	BB	BB	BB	BB	BB	BB	BB	BB	BB	BB	BB	BB	BB	BB	BB
chr3_9611495_A_C	3	9611495	TOP	[A/C]	BB	BB	BB	BB	BB	BB	BB	BB	BB	BB	BB	BB	BB	BB	BB	BB	BB	BB	BB	BB	BB	BB	BB	BB	BB	BB	BB	BB	BB	BB	BB	BB	BB	BB	BB	BB	BB	BB	BB	BB	BB	BB	BB	BB	BB
ae_C_T_chr3_9612918	3	9612918	BOT	[T/C]	BB	BB	BB	BB	BB	BB	BB	BB	BB	BB	BB	BB	BB	BB	BB	BB	BB	BB	BB	BB	BB	BB	BB	BB	BB	BB	BB	BB	BB	BB	BB	BB	BB	BB	BB	BB	BB	BB	BB	BB	BB	BB	BB	BB	BB
chr3_968604_G_T	3	968604	BOT	[T/G]	BB	BB	BB	BB	BB	BB	BB	BB	BB	BB	BB	BB	BB	BB	BB	BB	BB	BB	BB	BB	BB	BB	BB	BB	BB	BB	BB	BB	BB	BB	BB	BB	BB	BB	BB	BB	BB	BB	BB	BB	BB	BB	BB	BB	BB
chr3_9699399_C_T	3	9699399	TOP	[A/G]	BB	BB	BB	BB	BB	BB	BB	BB	BB	BB	BB	BB	BB	BB	BB	BB	BB	BB	BB	BB	BB	BB	BB	BB	BB	BB	BB	BB	BB	BB	BB	NC	BB	BB	BB	BB	BB	BB	BB	BB	BB	BB	BB	BB	BB
chr3_9704632_C_T	3	9704632	TOP	[A/G]	BB	BB	BB	BB	BB	BB	BB	BB	BB	BB	BB	BB	BB	BB	BB	BB	BB	BB	BB	BB	BB	BB	BB	BB	BB	BB	BB	BB	BB	BB	BB	BB	BB	BB	BB	BB	BB	BB	BB	BB	BB	BB	BB	BB	BB
chr3_9706422_C_T	3	9706422	BOT	[T/C]	NC	BB	BB	BB	AB	BB	AB	AB	BB	NC	AA	AB	AB	AB	BB	AA	AB	AA	AB	AB	AB	AA	AB	AB	BB	AB	BB	AA	BB	AB	AB	AB	BB	AB	AB	AB	AB	AB	AA	BB	AA	AB	AB	AB	BB
chr3_972948_C_T	3	972948	BOT	[T/C]	AA	AB	AB	AB	AB	AB	AA	AB	AB	AB	AA	AB	AB	AB	AB	AB	AA	BB	AA	AA	AB	AA	AB	AA	BB	AA	AB	AA	AB	AB	AA	NC	AB	AA	AB	AB	AB	AA	AA	AB	AA	BB	BB	AB	BB
chr3_993879_A_G	3	993879	TOP	[A/G]	AA	AA	AA	AA	AA	AA	AA	AA	AA	AA	AA	AA	AA	AA	AA	AA	AA	AA	AA	AA	AA	AA	AA	AA	AA	AA	AA	AA	AA	AA	AA	AA	AA	AA	AA	AA	AA	AA	AA	AA	AA	AA	AA	AA	AA
chr3_9989675_A_G	3	9989675	TOP	[A/G]	AA	AA	AA	AA	AA	AA	AA	AA	AA	AA	AA	AA	AA	AA	AA	AA	AA	AA	AA	AA	AA	AA	AA	AA	AA	AA	AA	AA	AA	AA	AA	AA	AA	AA	AA	AA	AA	AA	AA	AA	AA	AA	AA	AA	AA
chr3_9992068_C_T	3	9992068	TOP	[A/G]	AA	AA	AA	AA	AA	AA	AA	AA	AA	AA	AA	AA	AA	AA	AA	AA	AA	AA	AA	AA	AA	AA	AA	AA	AA	AA	AA	AA	AA	AA	AA	AA	AA	AA	AA	AA	AA	AA	AA	AA	AA	AA	AA	AA	AA
chr4_10021568_G_T	4	10021568	BOT	[T/G]	AA	AA	AA	AA	AA	AA	AA	AA	AA	AA	AA	AA	AA	AA	AA	AA	AA	AA	AA	AA	AA	AA	AA	AA	AA	AA	AA	AA	AA	AA	AA	AB	AA	AA	AA	AA	AA	AA	AA	AA	AA	AA	AA	AA	AA
chr4_1014809_A_G	4	1014809	TOP	[A/G]	BB	BB	BB	BB	BB	BB	BB	BB	BB	BB	BB	BB	BB	BB	BB	BB	BB	BB	BB	BB	BB	BB	BB	BB	BB	BB	BB	BB	BB	BB	BB	BB	BB	BB	BB	BB	BB	BB	BB	BB	BB	BB	BB	BB	BB
chr4_1016653_A_G	4	1016653	TOP	[A/G]	AA	AA	AA	AA	AA	AA	AA	AA	AA	AA	AA	AA	AA	AA	AA	AA	AA	AA	AA	AA	AA	AA	AA	AA	AA	AA	AA	AA	AA	AA	AA	AA	AA	AA	AA	AA	AA	AA	AA	AA	AA	AA	AA	AA	AA
chr4_10368454_C_T	4	10368454	TOP	[A/G]	BB	BB	BB	BB	BB	BB	BB	BB	BB	BB	BB	BB	BB	BB	BB	BB	BB	BB	BB	BB	BB	BB	BB	BB	BB	BB	BB	BB	BB	BB	BB	BB	BB	BB	BB	BB	BB	BB	BB	BB	BB	BB	BB	BB	BB
chr4_10375425_A_G	4	10375425	TOP	[A/G]	BB	BB	BB	BB	BB	BB	BB	BB	BB	BB	BB	BB	BB	BB	BB	BB	BB	BB	BB	BB	BB	BB	BB	BB	BB	BB	BB	BB	BB	BB	BB	BB	BB	BB	BB	BB	BB	BB	BB	BB	BB	BB	BB	BB	BB
cn_C_T_chr4_10385822	4	10385822	TOP	[A/G]	BB	BB	BB	BB	BB	BB	BB	BB	BB	BB	BB	BB	BB	BB	BB	BB	BB	BB	BB	BB	BB	BB	BB	BB	BB	BB	BB	BB	BB	BB	BB	BB	BB	BB	BB	BB	BB	BB	BB	BB	BB	BB	BB	BB	BB
chr4_10404817_C_T	4	10404817	BOT	[T/C]	BB	BB	BB	BB	BB	BB	BB	BB	BB	BB	BB	BB	BB	BB	BB	BB	BB	BB	BB	BB	BB	BB	BB	BB	BB	BB	BB	BB	BB	BB	BB	BB	BB	BB	BB	BB	BB	BB	BB	BB	BB	BB	BB	BB	BB
chr4_10405419_A_G	4	10405419	BOT	[T/C]	BB	BB	BB	BB	BB	BB	BB	BB	BB	BB	BB	BB	BB	BB	BB	BB	BB	BB	BB	BB	BB	BB	BB	BB	BB	BB	BB	BB	BB	BB	BB	BB	BB	BB	BB	BB	BB	BB	BB	BB	BB	BB	BB	BB	BB
chr4_1050262_A_G	4	1050262	TOP	[A/G]	BB	BB	AA	AA	AB	AB	AB	BB	AB	AB	BB	AB	AB	BB	AB	AA	AA	AB	AA	AB	BB	AB	BB	AB	AA	AB	AB	BB	BB	AB	AB	NC	BB	BB	AB	AA	AB	BB	BB	AB	BB	AB	AB	AA	AA
chr4_10518984_C_T	4	10518984	BOT	[T/C]	BB	BB	BB	BB	BB	BB	BB	BB	BB	BB	BB	BB	BB	BB	BB	BB	BB	BB	BB	BB	BB	BB	BB	BB	BB	BB	BB	BB	BB	BB	BB	BB	BB	BB	BB	BB	BB	BB	BB	BB	BB	BB	BB	BB	BB
chr4_10520938_A_G	4	10520938	TOP	[A/G]	BB	BB	BB	BB	BB	BB	BB	BB	BB	BB	BB	BB	BB	BB	BB	BB	BB	BB	BB	BB	BB	BB	BB	BB	BB	BB	BB	BB	BB	BB	BB	NC	BB	BB	BB	BB	BB	BB	BB	BB	BB	BB	BB	BB	BB
chr4_10609751_A_G	4	10609751	TOP	[A/G]	AA	AA	AA	AA	AA	AA	AA	AA	AA	AA	AA	AA	AA	AA	AA	AA	AA	AA	AA	AA	AA	AA	AA	AA	AA	AA	AA	AA	AA	AA	AA	AA	AA	AA	AA	AA	AA	AA	AA	AA	AA	AA	AA	AA	AA
chr4_10626644_A_C	4	10626644	TOP	[A/C]	AA	AA	AA	AA	AA	AA	AA	AA	AA	AA	AA	AA	AA	AA	AA	AA	AA	AA	AA	AA	AA	AA	AA	AA	AA	AA	AA	AA	AA	AA	AA	AA	AA	AA	AA	AA	AA	AA	AA	AA	AA	AA	AA	AA	AA
chr4_10642786_G_T	4	10642786	TOP	[A/C]	AA	AA	AA	AA	AA	AA	AA	AA	AA	AA	AA	AA	AA	AA	AA	AA	AA	AA	AA	AA	AA	AA	AA	AA	AA	AA	AA	AA	AA	AA	AA	AA	AA	AA	AA	AA	AA	AA	AA	AA	AA	AA	AA	AA	AA
li_G_A_chr4_10645171	4	10645171	BOT	[T/C]	BB	BB	BB	BB	BB	BB	BB	BB	BB	BB	BB	BB	BB	BB	BB	BB	BB	BB	BB	BB	BB	BB	BB	BB	BB	BB	BB	BB	BB	BB	BB	BB	BB	BB	BB	BB	BB	BB	BB	BB	BB	BB	BB	BB	BB
chr4_10658785_A_G	4	10658785	TOP	[A/G]	AA	AA	AA	AA	AA	AA	AA	AA	AA	AA	AA	AA	AA	AA	AA	AA	AA	AA	AA	AA	AA	AA	AA	AA	AA	AA	AA	AA	AA	AA	AA	AA	AA	AA	AA	AA	AA	AA	AA	AA	AA	AA	AA	AA	AA
lb_A_G_chr4_10693910	4	10693910	TOP	[A/G]	AA	AA	AA	AA	AA	AA	AA	AA	AA	AA	AA	AA	AA	AA	AA	AA	AA	AA	AA	AA	AA	AA	AA	AA	AA	AA	AA	AA	AA	AA	AA	AA	AA	AA	AA	AA	AA	AA	AA	AA	AA	AA	AA	AA	AA
chr4_10699158_A_G	4	10699158	TOP	[A/G]	BB	BB	BB	BB	BB	BB	BB	BB	BB	BB	BB	BB	BB	BB	BB	BB	BB	BB	BB	BB	BB	BB	BB	BB	BB	BB	BB	BB	BB	BB	BB	BB	BB	BB	BB	BB	BB	BB	BB	BB	BB	BB	BB	BB	BB
chr4_10738289_A_G	4	10738289	TOP	[A/G]	AA	AA	AA	AA	AA	AA	AA	AA	AA	AA	AA	AA	AA	AA	AA	AA	AA	AA	AA	AA	AA	AA	AA	AA	AA	AA	AA	AA	AA	AA	AA	AA	AA	AA	AA	AA	AA	AA	AA	AA	AA	AA	AA	AA	AA
chr4_1086516_A_G	4	1086516	BOT	[T/C]	BB	BB	BB	BB	BB	BB	BB	BB	BB	BB	BB	BB	BB	BB	BB	BB	BB	BB	BB	BB	BB	BB	BB	BB	BB	BB	BB	BB	BB	BB	BB	BB	BB	BB	BB	BB	BB	BB	BB	BB	BB	BB	BB	BB	BB
chr4_10883502_C_T	4	10883502	BOT	[T/C]	BB	BB	BB	BB	BB	BB	BB	BB	BB	BB	BB	BB	BB	BB	BB	BB	BB	BB	BB	BB	BB	BB	BB	BB	BB	BB	BB	BB	BB	BB	BB	BB	BB	BB	BB	BB	BB	BB	BB	BB	BB	BB	BB	BB	BB
cn_C_A_chr4_10911415	4	10911415	BOT	[T/G]	BB	BB	BB	BB	BB	BB	BB	BB	BB	BB	BB	BB	BB	BB	BB	BB	BB	BB	BB	BB	BB	BB	BB	BB	BB	BB	BB	BB	BB	BB	BB	BB	BB	BB	BB	BB	BB	BB	BB	BB	BB	BB	BB	BB	BB
chr4_10913217_G_T	4	10913217	BOT	[T/G]	AA	AA	AA	AA	AA	AA	AA	AA	AA	AA	AA	AA	AA	AA	AA	AA	AA	AA	AA	AA	AA	AA	AA	AA	AA	AA	AA	AA	AA	AA	AA	AA	AA	AA	AA	AA	AA	AA	AA	AA	AA	AA	AA	AA	AA
cn_C_T_chr4_1093476	4	1093476	TOP	[A/G]	BB	BB	BB	BB	BB	BB	BB	BB	BB	BB	BB	BB	BB	BB	BB	BB	BB	BB	BB	BB	BB	BB	BB	BB	BB	BB	BB	BB	BB	BB	BB	BB	BB	BB	BB	BB	BB	BB	BB	BB	BB	BB	BB	BB	BB
chr4_10996129_G_T	4	10996129	BOT	[T/G]	AA	AA	AA	AA	AA	AA	AA	AA	AA	AA	AA	AA	AA	AA	AA	AA	AA	AA	AA	AA	AA	AA	AA	AA	AA	AA	AA	AA	AA	AA	AA	AA	AA	AA	AA	AA	AA	AA	AA	AA	AA	AA	AA	AA	AA
ae_C_A_chr4_11000446	4	11000446	TOP	[A/C]	BB	BB	BB	BB	BB	BB	BB	BB	BB	BB	BB	BB	BB	BB	BB	BB	BB	BB	BB	BB	BB	BB	BB	BB	BB	BB	BB	BB	BB	BB	BB	BB	BB	BB	BB	BB	BB	BB	BB	BB	BB	BB	BB	BB	BB
chr4_11009201_A_C	4	11009201	BOT	[T/G]	BB	BB	BB	BB	BB	BB	BB	BB	BB	BB	BB	BB	BB	BB	BB	BB	BB	BB	BB	BB	BB	BB	BB	BB	BB	BB	BB	BB	BB	BB	BB	BB	BB	BB	BB	BB	BB	BB	BB	BB	BB	BB	BB	BB	BB
chr4_11010132_A_C	4	11010132	TOP	[A/C]	BB	BB	BB	BB	BB	BB	BB	BB	BB	BB	BB	BB	BB	BB	BB	BB	BB	BB	BB	BB	BB	BB	BB	BB	BB	BB	BB	BB	BB	BB	BB	BB	BB	BB	BB	BB	BB	BB	BB	BB	BB	BB	BB	BB	BB
chr4_11091087_C_T	4	11091087	TOP	[A/G]	BB	BB	BB	BB	BB	BB	BB	BB	BB	BB	BB	BB	BB	BB	BB	BB	BB	BB	BB	BB	BB	BB	BB	BB	BB	BB	BB	BB	BB	BB	BB	BB	BB	BB	BB	BB	BB	BB	BB	BB	BB	BB	BB	BB	BB
chr4_11131156_C_T	4	11131156	TOP	[A/G]	BB	BB	BB	BB	BB	BB	BB	BB	BB	BB	BB	BB	BB	BB	BB	BB	BB	BB	BB	BB	BB	BB	BB	BB	BB	BB	BB	BB	BB	BB	BB	BB	BB	BB	BB	BB	BB	BB	BB	BB	BB	BB	BB	BB	BB
chr4_11131820_A_G	4	11131820	BOT	[T/C]	AA	AA	AA	AA	AA	AA	AA	AA	AA	AA	AA	AA	AA	AA	AA	AA	AA	AA	AA	AA	AA	AA	AA	AA	AA	AA	AA	AA	AA	AA	AA	AA	AA	AA	AA	AA	AA	AA	AA	AA	AA	AA	AA	AA	AA
chr4_11138853_A_C	4	11138853	TOP	[A/C]	BB	BB	BB	BB	BB	BB	BB	BB	BB	BB	BB	BB	BB	BB	BB	BB	BB	BB	BB	BB	BB	BB	BB	BB	BB	BB	BB	BB	BB	BB	BB	BB	BB	BB	BB	BB	BB	BB	BB	BB	BB	BB	BB	BB	BB
chr4_1121101_A_G	4	1121101	BOT	[T/C]	AA	AA	AA	AA	AA	AA	AA	AA	AA	AA	AA	AA	AA	AA	AA	AA	AA	AA	AA	AA	AA	AA	AA	AA	AA	AA	AA	AA	AA	AA	AA	AA	AA	AA	AA	AA	AA	AA	AA	AA	AA	AA	AA	AA	AA
chr4_11491560_C_T	4	11491560	BOT	[T/C]	AA	AA	AA	AA	AA	AA	AA	AA	AA	AA	AA	AA	AA	AA	AA	AA	AA	AA	AA	AA	AA	AA	AA	AA	AA	AA	AA	AA	AA	AA	AA	AA	AA	AA	AA	AA	AA	AA	AA	AA	AA	AA	AA	AA	AA
chr4_11493009_C_T	4	11493009	BOT	[T/C]	AA	AA	AA	AA	AA	AA	AA	AA	AA	AA	AA	AA	AA	AA	AA	AA	AA	AA	AA	AA	AA	AA	AA	AA	AA	AA	AA	AA	AA	AA	AA	AA	AA	AA	AA	AA	AA	AA	AA	AA	AA	AA	AA	AA	AA
chr4_11496134_A_C	4	11496134	TOP	[A/C]	BB	BB	BB	BB	BB	BB	BB	BB	BB	BB	BB	BB	BB	BB	BB	BB	BB	BB	BB	BB	BB	BB	BB	BB	BB	BB	BB	BB	BB	BB	BB	BB	BB	BB	BB	BB	BB	BB	BB	BB	BB	BB	BB	BB	BB
chr4_11504897_C_T	4	11504897	BOT	[T/C]	BB	BB	BB	BB	BB	BB	BB	BB	BB	BB	BB	BB	BB	BB	BB	BB	BB	BB	BB	BB	BB	BB	BB	BB	BB	BB	BB	BB	BB	BB	BB	BB	BB	BB	BB	BB	BB	BB	BB	BB	BB	BB	BB	BB	BB
ae_A_G_chr4_11509339	4	11509339	BOT	[T/C]	AA	AA	AA	AA	AA	AA	AA	AA	AA	AA	AA	AA	AA	AA	AA	AA	AA	AA	AA	AA	AA	AA	AA	AA	AA	AA	AA	AA	AA	AA	AA	AA	AA	AA	AA	AA	AA	AA	AA	AA	AA	AA	AA	AA	AA
chr4_1153580_C_T	4	1153580	BOT	[T/C]	AA	AA	AA	AA	AA	AA	AA	AA	AA	AA	AA	AA	AA	AA	AA	AA	AA	AA	AA	AA	AA	AA	AA	AA	AA	AA	AA	AA	AA	AA	AA	AA	AA	AA	AA	AA	AA	AA	AA	AA	AA	AA	AA	AA	AA
chr4_1159330_C_T	4	1159330	TOP	[A/G]	BB	BB	AA	AA	NC	AB	AB	BB	AB	AB	BB	AB	AB	BB	AB	AA	AA	AB	AA	AB	BB	AB	BB	AB	AA	AB	AB	BB	BB	AB	AB	NC	BB	BB	AB	AA	AB	BB	BB	AB	BB	AB	AB	AB	AA
chr4_1159403_A_C	4	1159403	BOT	[T/G]	BB	BB	BB	BB	BB	BB	BB	BB	BB	BB	BB	BB	BB	BB	BB	BB	BB	BB	BB	BB	BB	BB	BB	BB	BB	BB	BB	BB	BB	BB	BB	BB	BB	BB	BB	BB	BB	BB	BB	BB	BB	BB	BB	BB	BB
lb_G_A_chr4_11681046	4	11681046	BOT	[T/C]	BB	BB	BB	BB	BB	BB	BB	BB	BB	BB	BB	BB	BB	BB	BB	BB	BB	BB	BB	BB	BB	BB	BB	BB	BB	BB	BB	BB	BB	BB	BB	BB	BB	BB	BB	BB	BB	BB	BB	BB	BB	BB	BB	BB	BB
be_G_T_chr4_11758311	4	11758311	TOP	[A/C]	BB	BB	BB	BB	BB	BB	BB	BB	BB	BB	BB	BB	BB	BB	BB	BB	BB	BB	BB	BB	BB	BB	BB	BB	BB	BB	BB	BB	BB	BB	BB	BB	BB	BB	BB	BB	BB	BB	BB	BB	BB	BB	BB	BB	BB
cn_T_C_chr4_11810194	4	11810194	BOT	[T/C]	AA	AA	AA	AA	AA	AA	AA	AA	AA	AA	AA	AA	AA	AA	AA	AA	AA	AA	AA	AA	AA	AA	AA	AA	AA	AA	AA	AA	AA	AA	AA	AA	AA	AA	AA	AA	AA	AA	AA	AA	AA	AA	AA	AA	AA
chr4_11867261_A_G	4	11867261	TOP	[A/G]	BB	BB	BB	BB	BB	BB	BB	BB	BB	BB	BB	BB	BB	BB	BB	BB	BB	BB	BB	BB	BB	BB	BB	BB	BB	BB	BB	BB	BB	BB	BB	BB	BB	BB	BB	BB	BB	BB	BB	BB	BB	BB	BB	BB	BB
chr4_11875434_A_G	4	11875434	BOT	[T/C]	AA	AA	AA	AA	AA	AA	AA	AA	AA	AA	AA	AA	AA	AA	AA	AA	AA	AA	AA	AA	AA	AA	AA	AA	AA	AA	AA	AA	AA	AA	AA	AA	AA	AA	AA	AA	AA	AA	AA	AA	AA	AA	AA	AA	AA
chr4_11909002_G_T	4	11909002	BOT	[T/G]	AA	AA	AA	AA	AA	AA	AA	AA	AA	AA	AA	AA	AA	AA	AA	AA	AA	AA	AA	AA	AA	AA	AA	AA	AA	AA	AA	AA	AA	AA	AA	AA	AA	AA	AA	AA	AA	AA	AA	AA	AA	AA	AA	AA	AA
li_G_T_chr4_11923996	4	11923996	TOP	[A/C]	BB	BB	BB	BB	BB	BB	BB	BB	BB	BB	BB	BB	BB	BB	BB	BB	BB	BB	BB	BB	BB	BB	BB	BB	BB	BB	BB	BB	BB	BB	BB	BB	BB	BB	BB	BB	BB	BB	BB	BB	BB	BB	BB	BB	BB
chr4_11925916_C_T	4	11925916	BOT	[T/C]	AB	AB	AB	AB	AB	AB	AB	AB	AB	AB	AB	AB	AB	AB	AB	AB	AB	AB	AB	AB	AB	AB	AB	AB	AB	AB	AB	AB	AB	AB	AB	AB	AB	AB	AB	AB	AB	AB	AB	AB	AB	AB	AB	AB	AB
chr4_11927359_C_T	4	11927359	TOP	[A/G]	BB	BB	BB	BB	BB	BB	BB	BB	BB	BB	BB	BB	BB	BB	BB	BB	BB	BB	BB	BB	BB	BB	BB	BB	BB	BB	BB	BB	BB	BB	BB	BB	BB	BB	BB	BB	BB	BB	BB	BB	BB	BB	BB	BB	BB
chr4_1192897_C_T	4	1192897	BOT	[T/C]	AA	AA	AA	AA	AA	AA	AA	AA	AA	AA	AA	AA	AA	AA	AA	AA	AA	AA	AA	AA	AA	AA	AA	AA	AA	AA	AA	AA	AA	AA	AA	NC	AA	AA	AA	AA	AA	AA	AA	AA	AA	AA	AA	AA	AA
ae_A_C_chr4_11952579	4	11952579	TOP	[A/C]	AA	AA	AA	AA	AA	AA	AA	AA	AA	AA	AA	AA	AA	AA	AA	AA	AA	AA	AA	AA	AA	AA	AA	AA	AA	AA	AA	AA	AA	AA	AA	AA	AA	AA	AA	AA	AA	AA	AA	AA	AA	AA	AA	AA	AA
chr4_12096247_A_G	4	12096247	TOP	[A/G]	AA	AA	AA	AA	AA	AA	AA	AA	AA	AA	AA	AA	AA	AA	AA	AA	AA	AA	AA	AA	AA	AA	AA	AA	AA	AA	AA	AA	AA	AA	AA	AA	AA	AA	AA	AA	AA	AA	AA	AA	AA	AA	AA	AA	AA
chr4_12152934_A_C	4	12152934	TOP	[A/C]	BB	BB	BB	BB	BB	BB	BB	BB	BB	BB	BB	BB	BB	BB	BB	BB	BB	BB	BB	BB	BB	BB	BB	BB	BB	BB	BB	BB	BB	BB	BB	BB	BB	BB	BB	BB	BB	BB	BB	BB	BB	BB	BB	BB	BB
chr4_12154064_A_G	4	12154064	BOT	[T/C]	AA	AA	AA	AA	AA	AA	AA	AA	AA	AA	AA	AA	AA	AA	AA	AA	AA	AA	AA	AA	AA	AA	AA	AA	AA	AA	AA	AA	AA	AA	AA	AA	AA	AA	AA	AA	AA	AA	AA	AA	AA	AA	AA	AA	AA
ae_T_C_chr4_1215853	4	1215853	BOT	[T/C]	AA	AA	BB	BB	NC	AB	AB	AA	AB	AB	AA	AB	AB	AA	AB	BB	BB	AB	BB	AB	AA	AB	AA	AB	BB	AB	AB	AA	AA	AB	AB	NC	AA	AA	AB	BB	AB	AA	AA	AB	AA	AB	AB	AB	BB
lb_T_C_chr4_12179317	4	12179317	BOT	[T/C]	AA	AA	AA	AA	AA	AA	AA	AA	AA	AA	AA	AA	AA	AA	AA	AA	AA	AA	AA	AA	AA	AA	AA	AA	AA	AA	AA	AA	AA	AA	AA	AA	AA	AA	AA	AA	AA	AA	AA	AA	AA	AA	AA	AA	AA
chr4_12205473_A_G	4	12205473	TOP	[A/G]	BB	BB	BB	BB	BB	BB	BB	BB	BB	BB	BB	BB	BB	BB	BB	BB	BB	BB	BB	BB	BB	BB	BB	BB	BB	BB	BB	BB	BB	BB	BB	BB	BB	BB	BB	BB	BB	BB	BB	BB	BB	BB	BB	BB	BB
cn_C_T_chr4_12210384	4	12210384	BOT	[T/C]	BB	BB	BB	BB	BB	BB	BB	BB	BB	BB	BB	BB	BB	BB	BB	BB	BB	BB	BB	BB	BB	BB	BB	BB	BB	BB	BB	BB	BB	BB	BB	BB	BB	BB	BB	BB	BB	BB	BB	BB	BB	BB	BB	BB	BB
lb_G_A_chr4_1252771	4	1252771	BOT	[T/C]	BB	BB	BB	BB	BB	BB	BB	BB	BB	BB	BB	BB	BB	BB	BB	BB	BB	BB	BB	BB	BB	BB	BB	BB	BB	BB	BB	BB	BB	BB	BB	BB	BB	BB	BB	BB	BB	BB	BB	BB	BB	BB	BB	BB	BB
cn_G_A_chr4_12659825	4	12659825	BOT	[T/C]	BB	BB	BB	BB	BB	BB	BB	BB	BB	BB	BB	BB	BB	BB	BB	BB	BB	BB	BB	BB	BB	BB	BB	BB	BB	BB	BB	BB	BB	BB	BB	BB	BB	BB	BB	BB	BB	BB	BB	BB	BB	BB	BB	BB	BB
chr4_1289322_C_T	4	1289322	BOT	[T/C]	AA	AA	AA	AA	AA	AA	AA	AA	AA	AA	AA	AA	AA	AA	AA	AA	AA	AA	AA	AA	AA	AA	AA	AA	AA	AA	AA	AA	AA	AA	AA	AA	AA	AA	AA	AA	AA	AA	AA	AA	AA	AA	AA	AA	AA
mu_s_G_A_chr4_12958908	4	12958908	BOT	[T/C]	BB	BB	BB	BB	BB	BB	BB	BB	BB	BB	BB	BB	BB	BB	BB	BB	BB	BB	BB	BB	BB	BB	BB	BB	BB	BB	BB	BB	BB	BB	BB	BB	BB	BB	BB	BB	BB	BB	BB	BB	BB	BB	BB	BB	BB
chr4_12967362_G_T	4	12967362	TOP	[A/C]	BB	BB	BB	BB	BB	BB	BB	BB	BB	BB	BB	BB	BB	BB	BB	BB	BB	BB	BB	BB	BB	BB	BB	BB	BB	BB	BB	BB	BB	BB	BB	BB	BB	BB	BB	BB	BB	BB	BB	BB	BB	BB	BB	BB	BB
chr4_12969221_A_G	4	12969221	BOT	[T/C]	AA	AA	AA	AA	AA	AA	AA	AA	AA	AA	AA	AA	AA	AA	AA	AA	AA	AA	AA	AA	AA	AA	AA	AA	AA	AA	AA	AA	AA	AA	AA	AA	AA	AA	AA	AA	AA	AA	AA	AA	AA	AA	AA	AA	AA
chr4_1299324_C_T	4	1299324	BOT	[T/C]	BB	BB	AA	AA	AB	AB	BB	BB	AB	AB	BB	AB	AB	NC	AB	AA	AA	AB	AA	AB	BB	AB	BB	AB	AA	AB	AB	BB	BB	AB	AB	NC	BB	BB	AB	AA	AB	BB	BB	AB	BB	AB	AB	AB	AA
chr4_13011516_A_G	4	13011516	BOT	[T/C]	BB	BB	BB	BB	BB	BB	BB	BB	BB	BB	BB	BB	BB	BB	BB	BB	BB	BB	BB	BB	BB	BB	BB	BB	BB	BB	BB	BB	BB	BB	BB	BB	BB	BB	BB	BB	BB	BB	BB	BB	BB	BB	BB	BB	BB
chr4_13019513_A_C	4	13019513	TOP	[A/C]	BB	BB	BB	BB	BB	BB	BB	BB	BB	BB	BB	BB	BB	BB	BB	BB	BB	BB	BB	BB	BB	BB	BB	BB	BB	BB	BB	BB	BB	BB	BB	BB	BB	BB	BB	BB	BB	BB	BB	BB	BB	BB	BB	BB	BB
chr4_13027302_C_T	4	13027302	TOP	[A/G]	AA	AA	AA	AA	AA	AA	AA	AA	AA	AA	AA	AA	AA	AA	AA	AA	AA	AA	AA	AA	AA	AA	AA	AA	AA	AA	AA	AA	AA	AA	AA	AA	AA	AA	AA	AA	AA	AA	AA	AA	AA	AA	AA	AA	AA
lb_C_T_chr4_13182462	4	13182462	BOT	[T/C]	AA	AA	AA	AA	AA	AA	AA	AA	AA	AA	AA	AA	AA	AA	AA	AA	AA	AA	AA	AA	AA	AA	AA	AA	AA	AA	AA	AA	AA	AA	AA	AA	AA	AA	AA	AA	AA	AA	AA	AA	AA	AA	AA	AA	AA
li_G_A_chr4_13205246	4	13205246	TOP	[A/G]	BB	BB	BB	BB	BB	BB	BB	BB	BB	BB	BB	BB	BB	BB	BB	BB	BB	BB	BB	BB	BB	BB	BB	BB	BB	BB	BB	BB	BB	BB	BB	BB	BB	BB	BB	BB	BB	BB	BB	BB	BB	BB	BB	BB	BB
chr4_13308805_A_C	4	13308805	TOP	[A/C]	BB	BB	BB	BB	BB	BB	BB	BB	BB	BB	BB	BB	BB	BB	BB	BB	BB	BB	BB	BB	BB	BB	BB	BB	BB	BB	BB	BB	BB	BB	BB	BB	BB	BB	BB	BB	BB	BB	BB	BB	BB	BB	BB	BB	BB
chr4_13332588_A_G	4	13332588	BOT	[T/C]	AA	AA	AA	AA	AA	AA	AA	AA	AA	AA	AA	AA	AA	AA	AA	AA	AA	AA	AA	AA	AA	AA	AA	AA	AA	AA	AA	AA	AA	AA	AA	NC	AA	AA	AA	AA	AA	AA	AA	AA	AA	AA	AA	AA	AA
chr4_13340308_A_G	4	13340308	BOT	[T/C]	AA	AA	AA	AA	AA	AA	AA	AA	AA	AA	AA	AA	AA	AA	AA	AA	AA	AA	AA	AA	AA	AA	AA	AA	AA	AA	AA	AA	AA	AA	AA	AA	AA	AA	AA	AA	AA	AA	AA	AA	AA	AA	AA	AA	AA
chr4_1337874_A_G	4	1337874	TOP	[A/G]	AA	AA	AA	AA	AA	AA	AA	AA	AA	AA	AA	AA	AA	AA	AA	AA	AA	AA	AA	AA	AA	AA	AA	AA	AA	AA	AA	AA	AA	AA	AA	NC	AA	AA	AA	AA	AA	AA	AA	AA	AA	AA	AA	AA	AA
ae_G_T_chr4_13422551	4	13422551	TOP	[A/C]	BB	BB	BB	BB	BB	BB	BB	BB	BB	BB	BB	BB	BB	BB	BB	BB	BB	BB	BB	BB	BB	BB	BB	BB	BB	BB	BB	BB	BB	BB	BB	BB	BB	BB	BB	BB	BB	BB	BB	BB	BB	BB	BB	BB	BB
chr4_13512826_C_T	4	13512826	TOP	[A/G]	AA	AA	AA	AA	AA	AA	AA	AA	AA	AA	AA	AA	AA	AA	AA	AA	AA	AA	AA	AA	AA	AA	AA	AA	AA	AA	AA	AA	AA	AA	AA	AA	AA	AA	AA	AA	AA	AA	AA	AA	AA	AA	AA	AA	AA
chr4_13544658_G_T	4	13544658	BOT	[T/G]	BB	BB	BB	BB	BB	BB	BB	BB	BB	BB	BB	BB	BB	BB	BB	BB	BB	BB	BB	BB	BB	BB	BB	BB	BB	BB	BB	BB	BB	BB	BB	BB	BB	BB	BB	BB	BB	BB	BB	BB	BB	BB	BB	BB	BB
chr4_13635094_C_T	4	13635094	BOT	[T/C]	AA	AA	AA	AA	AA	AA	AA	AA	AA	AA	AA	AA	AA	AA	AA	AA	AA	AA	AA	AA	AA	AA	AA	AA	AA	AA	AA	AA	AA	AA	AA	AA	AA	AA	AA	AA	AA	AA	AA	AA	AA	AA	AA	AA	AA
chr4_13650156_A_G	4	13650156	BOT	[T/C]	BB	BB	BB	BB	BB	BB	BB	BB	BB	BB	BB	BB	BB	BB	BB	BB	BB	BB	BB	BB	BB	BB	BB	BB	BB	BB	BB	BB	BB	BB	BB	BB	BB	BB	BB	BB	BB	BB	BB	BB	BB	BB	BB	BB	BB
chr4_1368451_A_G	4	1368451	TOP	[A/G]	BB	BB	BB	BB	BB	BB	BB	BB	BB	BB	BB	BB	BB	BB	BB	BB	BB	BB	BB	BB	BB	BB	BB	BB	BB	BB	BB	BB	BB	BB	BB	BB	BB	BB	BB	BB	BB	BB	BB	BB	BB	BB	BB	BB	BB
chr4_13696219_C_T	4	13696219	BOT	[T/C]	BB	BB	BB	BB	BB	BB	BB	BB	BB	BB	BB	BB	BB	BB	BB	BB	BB	BB	BB	BB	BB	BB	BB	BB	BB	BB	BB	BB	BB	BB	BB	BB	BB	BB	BB	BB	BB	BB	BB	BB	BB	BB	BB	BB	BB
chr4_13724443_G_T	4	13724443	TOP	[A/C]	BB	BB	BB	BB	BB	BB	BB	BB	BB	BB	BB	BB	BB	BB	BB	BB	BB	BB	BB	BB	BB	BB	BB	BB	BB	BB	BB	BB	BB	BB	BB	BB	BB	BB	BB	BB	BB	BB	BB	BB	BB	BB	BB	BB	BB
chr4_13726908_C_T	4	13726908	BOT	[T/C]	BB	BB	BB	BB	BB	BB	BB	BB	BB	BB	BB	BB	BB	BB	BB	BB	BB	BB	BB	BB	BB	BB	BB	BB	BB	BB	BB	BB	BB	BB	BB	BB	BB	BB	BB	BB	BB	BB	BB	BB	BB	BB	BB	BB	BB
chr4_13730499_C_T	4	13730499	BOT	[T/C]	AA	AA	AA	AA	AA	AA	AA	AA	AA	AA	AA	AA	AA	AA	AA	AA	AA	AA	AA	AA	AA	AA	AA	AA	AA	AA	AA	AA	AA	AA	AA	AA	AA	AA	AA	AA	AA	AA	AA	AA	AA	AA	AA	AA	AA
be_G_A_chr4_13771302	4	13771302	TOP	[A/G]	BB	BB	BB	BB	BB	BB	BB	BB	BB	BB	BB	BB	BB	BB	BB	BB	BB	BB	BB	BB	BB	BB	BB	BB	BB	BB	BB	BB	BB	BB	BB	BB	BB	BB	BB	BB	BB	BB	BB	BB	BB	BB	BB	BB	BB
cn_T_C_chr4_13793084	4	13793084	TOP	[A/G]	AA	AA	AA	AA	AA	AA	AA	AA	AA	AA	AA	AA	AA	AA	AA	AA	AA	AA	AA	AA	AA	AA	AA	AA	AA	AA	AA	AA	AA	AA	AA	AA	AA	AA	AA	AA	AA	AA	AA	AA	AA	AA	AA	AA	AA
chr4_13908605_A_G	4	13908605	TOP	[A/G]	BB	BB	BB	BB	BB	BB	BB	BB	BB	BB	BB	BB	BB	BB	BB	BB	BB	BB	BB	BB	BB	BB	BB	BB	BB	BB	BB	BB	BB	BB	BB	NC	BB	BB	BB	BB	BB	BB	BB	BB	BB	BB	BB	BB	BB
chr4_13910890_A_C	4	13910890	TOP	[A/C]	BB	BB	BB	BB	BB	BB	BB	BB	BB	BB	BB	BB	BB	BB	BB	BB	BB	BB	BB	BB	BB	BB	BB	BB	BB	BB	BB	BB	BB	BB	BB	BB	BB	BB	BB	BB	BB	BB	BB	BB	BB	BB	BB	BB	BB
chr4_13937597_C_T	4	13937597	BOT	[T/C]	AA	AA	AA	AA	AA	AA	AA	AA	AA	AA	AA	AA	AA	AA	AA	AA	AA	AA	AA	AA	AA	AA	AA	AA	AA	AA	AA	AA	AA	AA	AA	AA	AA	AA	AA	AA	AA	AA	AA	AA	AA	AA	AA	AA	AA
chr4_13964468_A_G	4	13964468	BOT	[T/C]	BB	BB	BB	BB	BB	BB	BB	BB	BB	BB	BB	BB	BB	BB	BB	BB	BB	BB	BB	BB	BB	BB	BB	BB	BB	BB	BB	BB	BB	BB	BB	BB	BB	BB	BB	BB	BB	BB	BB	BB	BB	BB	BB	BB	BB
chr4_13974720_A_C	4	13974720	TOP	[A/C]	AA	AA	AA	AA	AA	AA	AA	AA	AA	AA	AA	AA	AA	AA	AA	AA	AA	AA	AA	AA	AA	AA	AA	AA	AA	AA	AA	AA	AA	AA	AA	AA	AA	AA	AA	AA	AA	AA	AA	AA	AA	AA	AA	AA	AA
chr4_13995700_A_G	4	13995700	BOT	[T/C]	BB	BB	BB	BB	BB	BB	BB	BB	BB	BB	BB	BB	BB	BB	BB	BB	BB	BB	BB	BB	BB	BB	BB	BB	BB	BB	BB	BB	BB	BB	BB	BB	BB	BB	BB	BB	BB	BB	BB	BB	BB	BB	BB	BB	BB
chr4_13997028_G_T	4	13997028	TOP	[A/C]	AA	AA	AA	AA	AA	AA	AA	AA	AA	AA	AA	AA	AA	AA	AA	AA	AA	AA	AA	AA	AA	AA	AA	AA	AA	AA	AA	AA	AA	AA	AA	AA	AA	AA	AA	AA	AA	AA	AA	AA	AA	AA	AA	AA	AA
chr4_1402616_C_T	4	1402616	BOT	[T/C]	BB	BB	AA	AA	AB	AB	BB	BB	AB	AB	BB	AB	AB	BB	AB	AA	AA	AB	AA	AB	BB	AB	BB	AB	AA	AB	AB	BB	BB	AB	AB	NC	BB	BB	AB	AA	AB	BB	BB	AB	BB	AB	AB	AB	AA
lb_C_A_chr4_14164960	4	14164960	TOP	[A/C]	BB	BB	BB	BB	BB	BB	BB	BB	BB	BB	BB	BB	BB	BB	BB	BB	BB	BB	BB	BB	BB	BB	BB	BB	BB	BB	BB	BB	BB	BB	BB	BB	BB	BB	BB	BB	BB	BB	BB	BB	BB	BB	BB	BB	BB
chr4_14224653_C_T	4	14224653	TOP	[A/G]	AA	AA	AA	AA	AA	AA	AA	AA	AA	AA	AA	AA	AA	AA	AA	AA	AA	AA	AA	AA	AA	AA	AA	AA	AA	AA	AA	AA	AA	AA	AA	AA	AA	AA	AA	AA	AA	AA	AA	AA	AA	AA	AA	AA	AA
be_C_A_chr4_14225066	4	14225066	TOP	[A/C]	BB	BB	BB	BB	BB	BB	BB	BB	BB	BB	BB	BB	BB	BB	BB	BB	BB	BB	BB	BB	BB	BB	BB	BB	BB	BB	BB	BB	BB	BB	BB	BB	BB	BB	BB	BB	BB	BB	BB	BB	BB	BB	BB	BB	BB
cn_C_A_chr4_14230806	4	14230806	TOP	[A/C]	BB	BB	BB	BB	BB	BB	BB	BB	BB	BB	BB	BB	BB	BB	BB	BB	BB	BB	BB	BB	BB	BB	BB	BB	BB	BB	BB	BB	BB	BB	BB	BB	BB	BB	BB	BB	BB	BB	BB	BB	BB	BB	BB	BB	BB
chr4_1424112_A_G	4	1424112	BOT	[T/C]	AA	AA	AA	AA	AA	AA	AA	AA	AA	AA	AA	AA	AA	AA	AA	AA	AA	AA	AA	AA	AA	AA	AA	AA	AA	AA	AA	AA	AA	AA	AA	AA	AA	AA	AA	AA	AA	AA	AA	AA	AA	AA	AA	AA	AA
chr4_14294357_C_T	4	14294357	TOP	[A/G]	BB	BB	BB	BB	BB	BB	BB	BB	BB	BB	BB	BB	BB	BB	BB	BB	BB	BB	BB	BB	BB	BB	BB	BB	BB	BB	BB	BB	BB	BB	BB	BB	BB	BB	BB	BB	BB	BB	BB	BB	BB	BB	BB	BB	BB
chr4_14300798_A_C	4	14300798	BOT	[T/G]	BB	BB	BB	BB	BB	BB	BB	BB	BB	BB	BB	BB	BB	BB	BB	BB	BB	BB	BB	BB	BB	BB	BB	BB	BB	BB	BB	BB	BB	BB	BB	BB	BB	BB	BB	BB	BB	BB	BB	BB	BB	BB	BB	BB	BB
chr4_14330886_A_G	4	14330886	TOP	[A/G]	AA	AA	AA	AA	AA	AA	AA	AA	AA	AA	AA	AA	AA	AA	AA	AA	AA	AA	AA	AA	AA	AA	AA	AA	AA	AA	AA	AA	AA	AA	AA	AA	AA	AA	AA	AA	AA	AA	AA	AA	AA	AA	AA	AA	AA
chr4_14366795_A_G	4	14366795	TOP	[A/G]	BB	BB	BB	BB	BB	BB	BB	BB	BB	BB	BB	BB	BB	BB	BB	BB	BB	BB	BB	BB	BB	BB	BB	BB	BB	BB	BB	BB	BB	BB	BB	BB	BB	BB	BB	BB	BB	BB	BB	BB	BB	BB	BB	BB	BB
chr4_14399436_G_T	4	14399436	BOT	[T/G]	AA	AA	AA	AA	AA	AA	AA	AA	AA	AA	AA	AA	AA	AA	AA	AA	AA	AA	AA	AA	AA	AA	AA	AA	AA	AA	AA	AA	AA	AA	AA	AA	AA	AA	AA	AA	AA	AA	AA	AA	AA	AA	AA	AA	AA
chr4_1440831_A_G	4	1440831	TOP	[A/G]	AA	AA	AA	AA	AA	AA	AA	AA	AA	AA	AA	AA	AA	AA	AA	AA	AA	AA	AA	AA	AA	AA	AA	AA	AA	AA	AA	AA	AA	AA	AA	AA	AA	AA	AA	AA	AA	AA	AA	AA	AA	AA	AA	AA	AA
chr4_14418439_C_T	4	14418439	TOP	[A/G]	BB	BB	BB	BB	BB	BB	BB	BB	BB	BB	BB	BB	BB	BB	BB	BB	BB	BB	BB	BB	BB	BB	BB	BB	BB	BB	BB	BB	BB	BB	BB	BB	BB	BB	BB	BB	BB	BB	BB	BB	BB	BB	BB	BB	BB
chr4_14434786_A_C	4	14434786	TOP	[A/C]	BB	BB	BB	BB	BB	BB	BB	BB	BB	BB	BB	BB	BB	BB	BB	BB	BB	BB	BB	BB	BB	BB	BB	BB	BB	BB	BB	BB	BB	BB	BB	BB	BB	BB	BB	BB	BB	BB	BB	BB	BB	BB	BB	BB	BB
li_T_C_chr4_14436785	4	14436785	BOT	[T/C]	AA	AA	AA	AA	AA	AA	AA	AA	AA	AA	AA	AA	AA	AA	AA	AA	AA	AA	AA	AA	AA	AA	AA	AA	AA	AA	AA	AA	AA	AA	AA	AA	AA	AA	AA	AA	AA	AA	AA	AA	AA	AA	AA	AA	AA
chr4_14437322_A_G	4	14437322	TOP	[A/G]	AB	AB	BB	AA	AB	AB	AB	AB	AB	AB	AA	BB	AB	BB	AA	AB	BB	AB	AA	AB	AB	AA	BB	BB	AB	AB	AB	AA	AB	AA	AA	NC	BB	BB	BB	AA	BB	AA	BB	BB	AB	AB	AB	AB	AA
chr4_14527736_C_T	4	14527736	TOP	[A/G]	AA	AA	AA	AA	AA	AA	AA	AA	AA	AA	AA	AA	AA	AA	AA	AA	AA	AA	AA	AA	AA	AA	AA	AA	AA	AA	AA	AA	AA	AA	AA	AA	AA	AA	AA	AA	AA	AA	AA	AA	AA	AA	AA	AA	AA
chr4_14597442_C_T	4	14597442	BOT	[T/C]	AA	AA	AA	AA	AA	AA	AA	AA	AA	AA	AA	AA	AA	AA	AA	AA	AA	AA	AA	AA	AA	AA	AA	AA	AA	AA	AA	AA	AA	AA	AA	AA	AA	AA	AA	AA	AA	AA	AA	AA	AA	AA	AA	AA	AA
chr4_14606010_A_G	4	14606010	BOT	[T/C]	BB	BB	BB	BB	BB	BB	BB	BB	BB	BB	BB	BB	BB	BB	BB	BB	BB	BB	BB	BB	BB	BB	BB	BB	BB	BB	BB	BB	BB	BB	BB	BB	BB	BB	BB	BB	BB	BB	BB	BB	BB	BB	BB	BB	BB
chr4_14622644_A_G	4	14622644	TOP	[A/G]	AA	AA	AA	AA	AA	AA	AA	AA	AA	AA	AA	AA	AA	AA	AA	AA	AA	AA	AA	AA	AA	AA	AA	AA	AA	AA	AA	AA	AA	AA	AA	NC	AA	AA	AA	AA	AA	AA	AA	AA	AA	AA	AA	AA	AA
lb_T_C_chr4_14664182	4	14664182	BOT	[T/C]	AA	AA	AA	AA	AA	AA	AA	AA	AA	AA	AA	AA	AA	AA	AA	AA	AA	AA	AA	AA	AA	AA	AA	AA	AA	AA	AA	AA	AA	AA	AA	AA	AA	AA	AA	AA	AA	AA	AA	AA	AA	AA	AA	AA	AA
chr4_14682054_C_T	4	14682054	TOP	[A/G]	AA	AA	AA	AA	AA	AA	AA	AA	AA	AA	AA	AA	AA	AA	AA	AA	AA	AA	AA	AA	AA	AA	AA	AA	AA	AA	AA	AA	AA	AA	AA	AA	AA	AA	AA	AA	AA	AA	AA	AA	AA	AA	AA	AA	AA
chr4_14682462_C_T	4	14682462	BOT	[T/C]	BB	BB	BB	BB	BB	BB	BB	BB	BB	BB	BB	BB	BB	BB	BB	BB	BB	BB	BB	BB	BB	BB	BB	BB	BB	BB	BB	BB	BB	BB	BB	BB	BB	BB	BB	BB	BB	BB	BB	BB	BB	BB	BB	BB	BB
chr4_14682572_A_G	4	14682572	TOP	[A/G]	BB	BB	BB	BB	BB	BB	BB	BB	BB	BB	BB	BB	BB	BB	BB	BB	BB	BB	BB	BB	BB	BB	BB	BB	BB	BB	BB	BB	BB	BB	BB	BB	BB	BB	BB	BB	BB	BB	BB	BB	BB	BB	BB	BB	BB
chr4_14941_A_G	4	14941	BOT	[T/C]	BB	BB	BB	BB	BB	BB	BB	BB	BB	BB	BB	BB	BB	BB	BB	BB	BB	BB	BB	BB	BB	BB	BB	BB	BB	BB	BB	BB	BB	BB	BB	BB	BB	BB	BB	BB	BB	BB	BB	BB	BB	BB	BB	BB	BB
chr4_14967063_A_G	4	14967063	TOP	[A/G]	AB	AB	AA	BB	AB	AB	AB	AB	AB	AB	BB	AA	AB	AA	BB	AB	AA	AB	BB	AB	AB	BB	AA	AA	AB	AB	AB	BB	AB	BB	BB	NC	AA	AA	AA	BB	AA	BB	AA	AA	AB	AB	AB	AB	BB
chr4_14979419_C_T	4	14979419	TOP	[A/G]	BB	BB	BB	BB	BB	BB	BB	BB	BB	BB	BB	BB	BB	BB	BB	BB	BB	BB	BB	BB	BB	BB	BB	BB	BB	BB	BB	BB	BB	BB	BB	BB	BB	BB	BB	BB	BB	BB	BB	BB	BB	BB	BB	BB	BB
chr4_1499114_C_T	4	1499114	TOP	[A/G]	AA	AA	AA	AA	AA	AA	AA	AA	AA	AA	AA	AA	AA	AA	AA	AA	AA	AA	AA	AA	AA	AA	AA	AA	AA	AA	AA	AA	AA	AA	AA	AA	AA	AA	AA	AA	AA	AA	AA	AA	AA	AA	AA	AA	AA
chr4_15011171_C_T	4	15011171	TOP	[A/G]	AB	AB	AA	BB	AB	AB	AB	AB	AB	AB	BB	AA	AB	AA	BB	AB	AA	AB	BB	AB	AB	BB	AA	AA	AB	AB	AB	BB	AB	BB	BB	AA	AA	AA	AA	BB	AA	BB	AA	AA	AB	AB	AB	AB	BB
chr4_15038967_C_T	4	15038967	BOT	[T/C]	BB	BB	BB	BB	BB	BB	BB	BB	BB	BB	BB	BB	BB	BB	BB	BB	BB	BB	BB	BB	BB	BB	BB	BB	BB	BB	BB	BB	BB	BB	BB	BB	BB	BB	BB	BB	BB	BB	BB	BB	BB	BB	BB	BB	BB
chr4_15082941_G_T	4	15082941	TOP	[A/C]	BB	BB	BB	BB	BB	BB	BB	BB	BB	BB	BB	BB	BB	BB	BB	BB	BB	BB	BB	BB	BB	BB	BB	BB	BB	BB	BB	BB	BB	BB	BB	BB	BB	BB	BB	BB	BB	BB	BB	BB	BB	BB	BB	BB	BB
chr4_15083457_A_G	4	15083457	TOP	[A/G]	BB	BB	BB	BB	BB	BB	BB	BB	BB	BB	BB	BB	BB	BB	BB	BB	BB	BB	BB	BB	BB	BB	BB	BB	BB	BB	BB	BB	BB	BB	BB	BB	BB	BB	BB	BB	BB	BB	BB	BB	BB	BB	BB	BB	BB
chr4_15113416_G_T	4	15113416	TOP	[A/C]	AA	AA	AA	AA	AA	AA	AA	AA	AA	AA	AA	AA	AA	AA	AA	AA	AA	AA	AA	AA	AA	AA	AA	AA	AA	AA	AA	AA	AA	AA	AA	AA	AA	AA	AA	AA	AA	AA	AA	AA	AA	AA	AA	AA	AA
chr4_15113763_A_G	4	15113763	TOP	[A/G]	BB	BB	BB	BB	BB	BB	BB	BB	BB	BB	BB	BB	BB	BB	BB	BB	BB	BB	BB	BB	BB	BB	BB	BB	BB	BB	BB	BB	BB	BB	BB	BB	BB	BB	BB	BB	BB	BB	BB	BB	BB	BB	BB	BB	BB
be_T_C_chr4_15130094	4	15130094	BOT	[T/C]	AA	AA	AA	AA	AA	AA	AA	AA	AA	AA	AA	AA	AA	AA	AA	AA	AA	AA	AA	AA	AA	AA	AA	AA	AA	AA	AA	AA	AA	AA	AA	AA	AA	AA	AA	AA	AA	AA	AA	AA	AA	AA	AA	AA	AA
chr4_15145553_C_T	4	15145553	BOT	[T/C]	BB	BB	BB	BB	BB	BB	BB	BB	BB	BB	BB	BB	BB	BB	BB	BB	BB	BB	BB	BB	BB	BB	BB	BB	BB	BB	BB	BB	BB	BB	BB	BB	BB	BB	BB	BB	BB	BB	BB	BB	BB	BB	BB	BB	BB
chr4_1516393_C_T	4	1516393	TOP	[A/G]	BB	BB	BB	BB	BB	BB	BB	BB	BB	BB	BB	BB	BB	BB	BB	BB	BB	BB	BB	BB	BB	BB	BB	BB	BB	BB	BB	BB	BB	BB	BB	BB	BB	BB	BB	BB	BB	BB	BB	BB	BB	BB	BB	BB	BB
lb_C_T_chr4_15168182	4	15168182	BOT	[T/C]	AB	AB	BB	AA	AB	AB	AB	AB	AB	AB	AA	BB	AB	BB	AA	AB	BB	AB	AA	AB	AB	AA	BB	BB	AB	AB	AB	AA	AB	AA	AA	NC	BB	BB	BB	AA	BB	AA	BB	BB	AB	AB	AB	AB	AA
chr4_15212585_A_G	4	15212585	TOP	[A/G]	BB	BB	BB	BB	BB	BB	BB	BB	BB	BB	BB	BB	BB	BB	BB	BB	BB	BB	BB	BB	BB	BB	BB	BB	BB	BB	BB	BB	BB	BB	BB	BB	BB	BB	BB	BB	BB	BB	BB	BB	BB	BB	BB	BB	BB
chr4_15254959_A_G	4	15254959	BOT	[T/C]	AB	AB	AA	BB	AB	AB	AB	AB	AB	AB	BB	AA	AB	AA	BB	AB	AA	AB	BB	AB	AB	BB	AA	AA	AB	AB	AB	BB	AB	BB	BB	NC	AA	AA	AA	BB	AA	BB	AA	AA	AB	AB	AB	AB	BB
chr4_15255259_A_G	4	15255259	TOP	[A/G]	AB	AB	AA	BB	AB	AB	AB	AB	AB	AB	BB	AA	AB	AA	BB	AB	AA	AB	BB	AB	AB	BB	AA	AA	AB	AB	AB	BB	AB	BB	BB	NC	AA	AA	AA	BB	AA	BB	AA	AA	AB	AB	AB	AB	BB
cn_T_C_chr4_15258058	4	15258058	TOP	[A/G]	AA	AA	AA	AA	AA	AA	AA	AA	AA	AA	AA	AA	AA	AA	AA	AA	AA	AA	AA	AA	AA	AA	AA	AA	AA	AA	AA	AA	AA	AA	AA	AA	AA	AA	AA	AA	AA	AA	AA	AA	AA	AA	AA	AA	AA
chr4_15293282_C_T	4	15293282	TOP	[A/G]	AA	AA	AA	AA	AA	AA	AA	AA	AA	AA	AA	AA	AA	AA	AA	AA	AA	AA	AA	AA	AA	AA	AA	AA	AA	AA	AA	AA	AA	AA	AA	AA	AA	AA	AA	AA	AA	AA	AA	AA	AA	AA	AA	AA	AA
chr4_15307990_C_T	4	15307990	TOP	[A/G]	AA	AA	AA	AA	AA	AA	AA	AA	AA	AA	AA	AA	AA	AA	AA	AA	AA	AA	AA	AA	AA	AA	AA	AA	AA	AA	AA	AA	AA	AA	AA	AA	AA	AA	AA	AA	AA	AA	AA	AA	AA	AA	AA	AA	AA
chr4_1551965_C_T	4	1551965	BOT	[T/C]	AA	AA	BB	BB	NC	AB	AA	AA	AB	AB	AA	AA	AB	AA	AB	BB	BB	AB	BB	AB	AA	AB	AA	AB	BB	AB	AB	AA	AA	AB	AB	NC	AA	AA	AB	BB	AB	AA	AA	AB	AA	AB	AB	AB	BB
SNP255_265	4	1554984	TOP	[A/G]	AA	AA	BB	BB	NC	AB	AA	AA	AB	AB	AA	AA	AB	NC	AB	BB	BB	AB	BB	AB	AA	AB	AA	AB	BB	AB	AB	AA	AA	AB	AB	NC	AA	AA	AB	BB	AB	AA	AA	AB	AA	AB	AB	AB	BB
chr4_1563025_A_G	4	1563025	BOT	[T/C]	AA	AA	AA	AA	AA	AA	AA	AA	AA	AA	AA	AA	AA	AA	AA	AA	AA	AA	AA	AA	AA	AA	AA	AA	AA	AA	AA	AA	AA	AA	AA	AA	AA	AA	AA	AA	AA	AA	AA	AA	AA	AA	AA	AA	AA
li_G_A_chr4_15655309	4	15655309	TOP	[A/G]	BB	BB	BB	BB	BB	BB	BB	BB	BB	BB	BB	BB	BB	BB	BB	BB	BB	BB	BB	BB	BB	BB	BB	BB	BB	BB	BB	BB	BB	BB	BB	BB	BB	BB	BB	BB	BB	BB	BB	BB	BB	BB	BB	BB	BB
lb_T_C_chr4_15655329	4	15655329	BOT	[T/C]	AA	AA	AA	AA	AA	AA	AA	AA	AA	AA	AA	AA	AA	AA	AA	AA	AA	AA	AA	AA	AA	AA	AA	AA	AA	AA	AA	AA	AA	AA	AA	AA	AA	AA	AA	AA	AA	AA	AA	AA	AA	AA	AA	AA	AA
chr4_15680926_G_T	4	15680926	TOP	[A/C]	AA	AA	AA	AA	AA	AA	AA	AA	AA	AA	AA	AA	AA	AA	AA	AA	AA	AA	AA	AA	AA	AA	AA	AA	AA	AA	AA	AA	AA	AA	AA	AA	AA	AA	AA	AA	AA	AA	AA	AA	AA	AA	AA	AA	AA
chr4_15711778_C_T	4	15711778	TOP	[A/G]	AA	AA	AA	AA	AA	AA	AA	AA	AA	AA	AA	AA	AA	AA	AA	AA	AA	AA	AA	AA	AA	AA	AA	AA	AA	AA	AA	AA	AA	AA	AA	AA	AA	AA	AA	AA	AA	AA	AA	AA	AA	AA	AA	AA	AA
cn_A_C_chr4_15718600	4	15718600	BOT	[T/G]	AA	AA	AA	AA	AA	AA	AA	AA	AA	AA	AA	AA	AA	AA	AA	AA	AA	AA	AA	AA	AA	AA	AA	AA	AA	AA	AA	AA	AA	AA	AA	AA	AA	AA	AA	AA	AA	AA	AA	AA	AA	AA	AA	AA	AA
be_C_T_chr4_15732262	4	15732262	TOP	[A/G]	BB	BB	BB	BB	BB	BB	BB	BB	BB	BB	BB	BB	BB	BB	BB	BB	BB	BB	BB	BB	BB	BB	BB	BB	BB	BB	BB	BB	BB	BB	BB	BB	BB	BB	BB	BB	BB	BB	BB	BB	BB	BB	BB	BB	BB
chr4_15732273_C_T	4	15732273	TOP	[A/G]	AB	AB	AA	BB	AB	AB	AB	AB	AB	AB	BB	AA	AB	NC	BB	AB	AA	AB	BB	AB	AB	BB	AA	AA	AB	AB	AB	BB	AB	BB	BB	NC	AA	AA	AA	BB	AA	BB	AA	AA	AB	AB	AB	AB	BB
chr4_15756010_C_T	4	15756010	TOP	[A/G]	AB	AB	AA	BB	AB	AB	AB	AB	AB	AB	BB	AA	AB	AA	BB	AB	AA	AB	BB	AB	AB	BB	AA	AA	AB	AB	AB	BB	AB	BB	BB	NC	AA	AA	AA	BB	AA	BB	AA	AA	AB	AB	AB	AB	BB
ae_A_G_chr4_15776522	4	15776522	TOP	[A/G]	AA	AA	AA	AA	AA	AA	AA	AA	AA	AA	AA	AA	AA	AA	AA	AA	AA	AA	AA	AA	AA	AA	AA	AA	AA	AA	AA	AA	AA	AA	AA	AA	AA	AA	AA	AA	AA	AA	AA	AA	AA	AA	AA	AA	AA
chr4_15781302_A_G	4	15781302	BOT	[T/C]	AB	AB	AA	BB	AB	AB	AB	AB	AB	AB	BB	AA	AB	AA	BB	AB	AA	AB	BB	AB	AB	BB	AA	AA	AB	AB	AB	BB	AB	BB	BB	NC	AA	AA	AA	BB	AA	BB	AA	AA	AB	AB	AB	AB	BB
chr4_15785160_C_T	4	15785160	BOT	[T/C]	AB	AB	BB	AA	AB	AB	AB	AB	AB	AB	AA	BB	AB	BB	AA	AB	BB	AB	AA	AB	AB	AA	BB	BB	AB	AB	AB	AA	AB	AA	AA	NC	BB	BB	BB	AA	BB	AA	BB	BB	AB	AB	AB	AB	AA
[truncated: 10,828 more rows]
[truncated: 87 more columns]
